# Supplementary material for: A pan-cancer analysis of prognostic genes
Source: PubMed Central journal article supplement (PMC4815555; doi:10.7717/peerj.1499), 2016-02-16

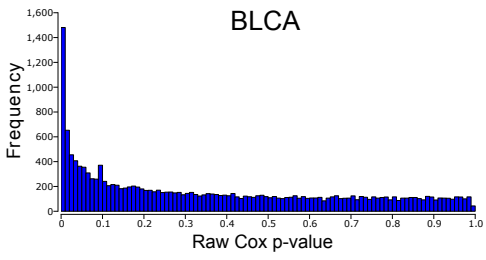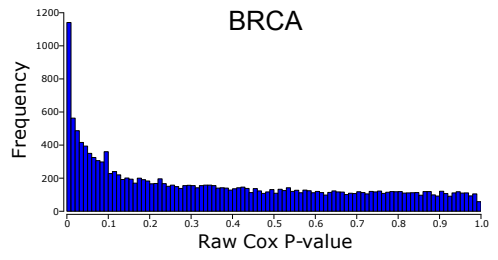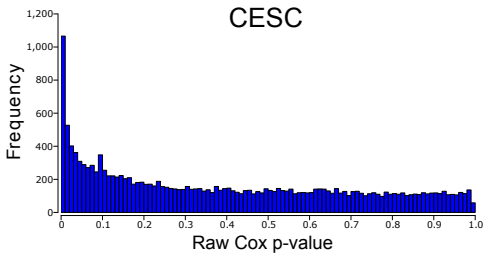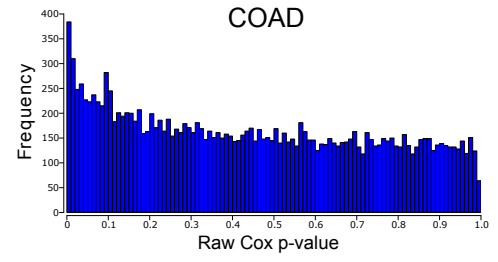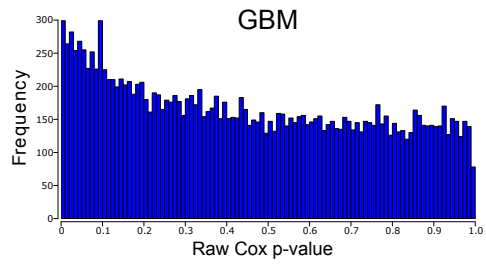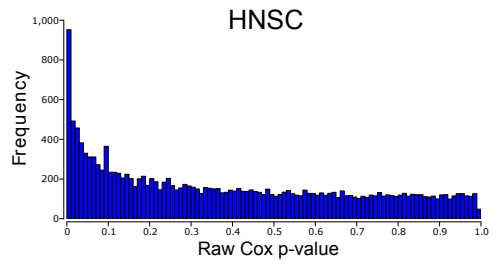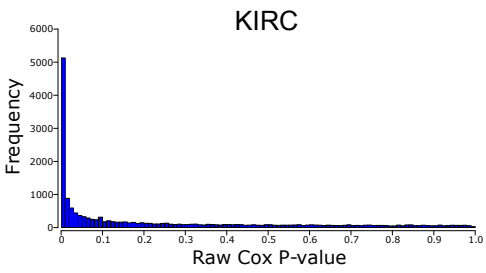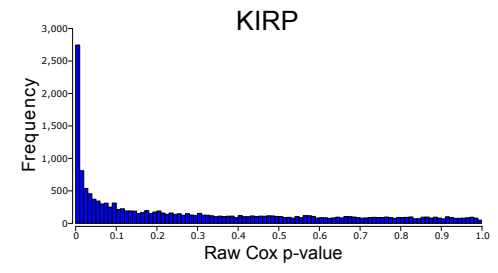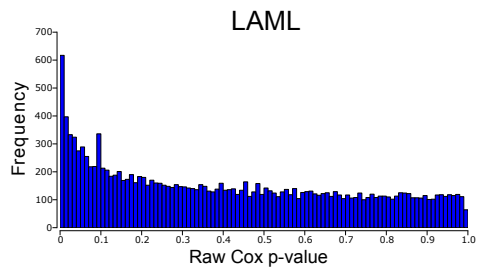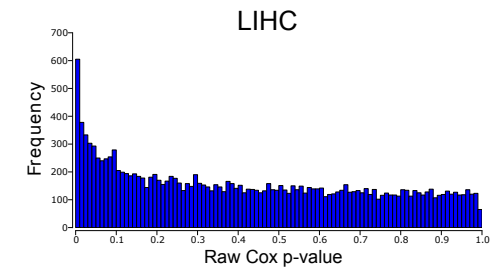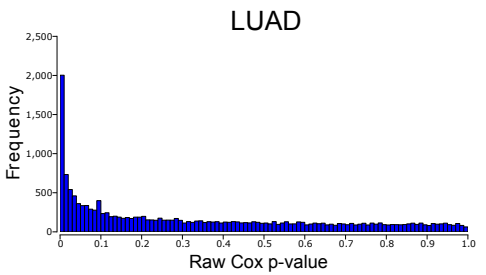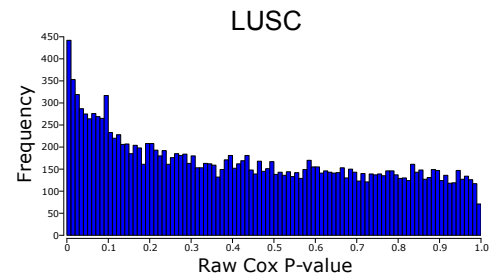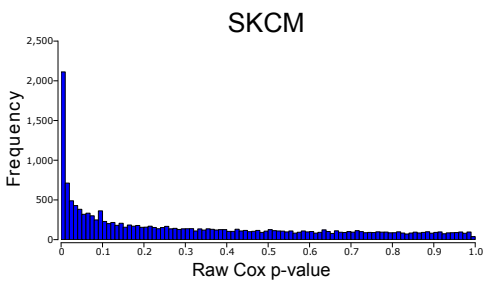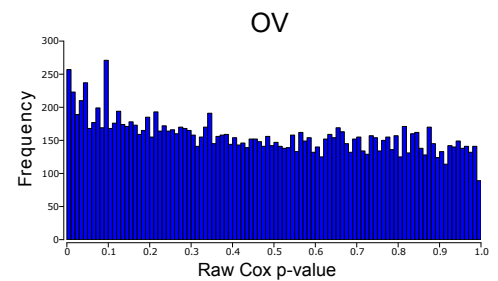

Supplement: peerj-03-1499-s004.pdf [file peerj-03-1499-s004.pdf]
