# Supplementary material for: A pan-cancer analysis of prognostic genes
Source: PeerJ. 2016 Feb 16;3:e1499. doi: 10.7717/peerj.1499 (PMC4815555; doi:10.7717/peerj.1499)
Supplement: Table S1 [file peerj-03-1499-s001.xlsx]

## Sheet: BLCA
Entrez ID	Gene Name	Raw Cox Coefficient	Sigmoidal Normalized Cox Coefficient	Raw Cox P-Value	BH Adjusted P-Value	Model: coxph(Surv(times,died) ~ gene + lowgrade + highgrade + sex + age
55876	GSDMB	-0.5413	-0.96175	1.6e-08	0.00026216
91316	LOC91316	-0.4993	-0.948435	1.7e-07	0.00139273
94101	ORMDL1	-0.45833	-0.931148	5.1e-07	0.00270353
80307	FER1L4	-0.4608	-0.932333	6.7e-07	0.00270353
3581	IL9R	-0.4629	-0.933324	8.6e-07	0.00270353
7072	TIA1	-0.46987	-0.936516	9.9e-07	0.00270353
29990	PILRB	-0.4641	-0.933885	1.6e-06	0.00374514
58527	C6orf115	-0.393	-0.891533	2e-06	0.0039324
166793	ZBTB49	-0.40216	-0.898169	2.3e-06	0.0039324
23301	EHBP1	0.4424	0.949291	2.4e-06	0.0039324
91355	LRP5L	-0.4266	-0.914042	3e-06	0.00399384
84807	NFKBID	-0.419	-0.909377	3.4e-06	0.00399384
653635	WASH7P	-0.4192	-0.909503	3.5e-06	0.00399384
285550	FAM200B	-0.3909	-0.889956	3.7e-06	0.00399384
440944	LOC440944	-0.4176	-0.908492	3.8e-06	0.00399384
10458	BAIAP2	0.3895	0.922624	3.9e-06	0.00399384
100288778	LOC100288778	-0.4146	-0.906568	4.7e-06	0.00446036
6690	SPINK1	-0.4354	-0.919156	4.9e-06	0.00446036
57018	CCNL1	-0.432	-0.917216	5.6e-06	0.00482926
53916	RAB4B	-0.4278	-0.914757	6.2e-06	0.00483748
8940	TOP3B	-0.4313	-0.916811	6.2e-06	0.00483748
386593	CHKB-CPT1B	-0.4326	-0.917561	6.9e-06	0.00513893
79026	AHNAK	0.4149	0.936787	7.4e-06	0.0052717
64968	MRPS6	-0.385	-0.885407	7.8e-06	0.00532512
84173	ELMOD3	-0.4048	-0.900009	9.2e-06	0.00546167
414059	TBC1D3B	-0.4248	-0.912958	9.3e-06	0.00546167
283416	C12orf61	0.3963	0.92669	9.4e-06	0.00546167
23193	GANAB	0.417	0.937839	9.7e-06	0.00546167
55608	ANKRD10	-0.4028	-0.898618	9.8e-06	0.00546167
23051	ZHX3	0.365	0.906109	1e-05	0.00546167
51601	LIPT1	-0.4123	-0.905066	1.1e-05	0.00561771
11129	SFRS16	-0.4135	-0.905852	1.1e-05	0.00561771
100129637	LOC100129637	-0.4151	-0.906891	1.2e-05	0.00561771
541473	LOC541473	-0.3958	-0.893604	1.2e-05	0.00561771
162966	ZNF600	-0.41095	-0.904174	1.2e-05	0.00561771
285359	LOC285359	-0.3774	-0.879286	1.4e-05	0.00637194
81688	C6orf62	-0.3644	-0.868104	1.9e-05	0.00798244
8558	CDK10	-0.4127	-0.905329	1.9e-05	0.00798244
89848	FCHSD1	-0.39353	-0.891928	1.9e-05	0.00798244
81669	CCNL2	-0.4176	-0.908492	2e-05	0.00801819
162989	DEDD2	-0.3867	-0.886735	2.1e-05	0.00801819
55620	STAP2	-0.3832	-0.883984	2.1e-05	0.00801819
64210	MMS19	0.3918	0.924023	2.2e-05	0.00801819
10336	PCGF3	-0.3961	-0.893824	2.2e-05	0.00801819
55007	FAM118A	-0.3869	-0.886891	2.3e-05	0.00801819
285074	LOC285074	-0.3732	-0.875774	2.3e-05	0.00801819
260294	NSUN5P2	-0.4003	-0.896854	2.3e-05	0.00801819
79649	MAP7D3	0.368	0.908298	2.4e-05	0.0081925
2012	EMP1	0.3885	0.922008	2.5e-05	0.00835969
5801	PTPRR	-0.371	-0.873897	2.6e-05	0.0085202
5777	PTPN6	-0.3787	-0.880355	2.9e-05	0.00927453
64772	ENGASE	-0.3953	-0.893237	3e-05	0.00927453
8481	OFD1	-0.398	-0.895205	3e-05	0.00927453
79073	TMEM109	0.3821	0.917954	3.2e-05	0.00970963
55657	ZNF692	-0.3986	-0.895637	3.5e-05	0.0102406
80345	ZSCAN16	-0.3738	-0.876282	3.5e-05	0.0102406
130162	C2orf63	-0.3856	-0.885877	3.6e-05	0.0102753
29945	ANAPC4	-0.3812	-0.882384	3.7e-05	0.0102753
148898	C1orf213	-0.3713	-0.874154	3.7e-05	0.0102753
129642	MBOAT2	0.3442	0.889506	4.2e-05	0.0114695
115110	LOC115110	-0.3819	-0.882946	4.3e-05	0.0115501
9013	TAF1C	-0.3739	-0.876366	4.6e-05	0.0118068
54808	DYM	0.3681	0.908371	4.7e-05	0.0118068
55142	HAUS2	0.3562	0.899396	4.8e-05	0.0118068
3551	IKBKB	-0.386	-0.88619	4.8e-05	0.0118068
729877	TBC1D3H	-0.3614	-0.86539	4.8e-05	0.0118068
80832	APOL4	-0.3468	-0.851428	4.9e-05	0.0118068
284702	NCRNA00201	-0.3693	-0.872428	4.9e-05	0.0118068
55692	LUC7L	-0.3928	-0.891384	5.1e-05	0.0121107
164668	APOBEC3H	-0.3806	-0.8819	5.2e-05	0.0121717
480	ATP1A4	-0.4036	-0.899177	5.4e-05	0.0124618
7391	USF1	-0.3663	-0.869796	5.5e-05	0.0125163
10225	CD96	-0.3291	-0.83272	5.7e-05	0.0127938
1375	CPT1B	-0.3754	-0.877626	6e-05	0.0129355
503542	SPRN	-0.3819	-0.882946	6e-05	0.0129355
7127	TNFAIP2	-0.3931	-0.891608	6e-05	0.0129355
135228	CD109	0.391	0.923539	6.1e-05	0.0129803
440503	PLIN5	-0.3602	-0.86429	6.2e-05	0.013024
84941	HSH2D	-0.3548	-0.859236	6.6e-05	0.013264
150209	AIFM3	-0.36127	-0.865271	6.8e-05	0.013264
1510	CTSE	-0.36595	-0.869486	6.8e-05	0.013264
10419	PRMT5	0.3414	0.887071	6.8e-05	0.013264
10475	TRIM38	-0.3694	-0.872514	6.8e-05	0.013264
7748	ZNF195	-0.3491	-0.853712	6.8e-05	0.013264
222643	UNC5CL	-0.3675	-0.870855	6.9e-05	0.0133008
152992	C4orf23	-0.3736	-0.876113	7e-05	0.0133366
91523	FAM113B	-0.3416	-0.846141	7.1e-05	0.0133717
55268	ECHDC2	-0.3756	-0.877793	7.4e-05	0.0135041
7696	ZNF137	-0.3549	-0.859331	7.4e-05	0.0135041
114932	MRFAP1L1	-0.3543	-0.858759	7.5e-05	0.0135041
757	TMEM50B	-0.3547	-0.85914	7.5e-05	0.0135041
51594	NBAS	0.3505	0.894807	7.8e-05	0.0138916
374666	WASH3P	-0.3458	-0.850424	7.9e-05	0.0139184
51291	GMIP	-0.33098	-0.834805	8e-05	0.0139447
124817	CNTD1	-0.3703	-0.873294	8.3e-05	0.0143153
84837	C14orf128	0.3411	0.886807	8.5e-05	0.0145076
119016	AGAP4	-0.3817	-0.882786	8.6e-05	0.0145269
284900	LOC284900	-0.361	-0.865024	9.2e-05	0.0153818
643253	CCT6P1	-0.337	-0.841321	9.4e-05	0.0154019
284233	LOC284233	-0.3664	-0.869885	9.4e-05	0.0154019
340390	KIAA1875	-0.3838	-0.88446	9.5e-05	0.0154116
51244	C3orf19	-0.333	-0.837018	9.7e-05	0.0154575
84312	BRMS1L	0.3503	0.894643	0.0001	0.0154575
1642	DDB1	0.3304	0.877005	0.0001	0.0154575
3640	INSL3	-0.3452	-0.849819	0.0001	0.0154575
5423	POLB	-0.3441	-0.848704	0.0001	0.0154575
301	ANXA1	0.338	0.884045	0.00011	0.0155375
23780	APOL2	-0.332	-0.835926	0.00011	0.0155375
158381	ATP8B5P	-0.34307	-0.847653	0.00011	0.0155375
84433	CARD11	-0.3507	-0.855283	0.00011	0.0155375
84668	FAM126A	0.3458	0.890876	0.00011	0.0155375
127845	GOLT1A	-0.3599	-0.864013	0.00011	0.0155375
9455	HOMER2	0.357	0.900024	0.00011	0.0155375
3661	IRF3	-0.3732	-0.875774	0.00011	0.0155375
7746	ZNF193	-0.3481	-0.852723	0.00011	0.0155375
147807	ZNF524	-0.34957	-0.854175	0.00011	0.0155375
177	AGER	-0.3611	-0.865115	0.00012	0.0159854
6359	CCL15	-0.3723	-0.875009	0.00012	0.0159854
79180	EFHD2	-0.3504	-0.854989	0.00012	0.0159854
54540	FAM193B	-0.3626	-0.866482	0.00012	0.0159854
3766	KCNJ10	-0.3384	-0.842802	0.00012	0.0159854
146880	LOC146880	-0.359	-0.863181	0.00012	0.0159854
79037	PVRIG	-0.354	-0.858472	0.00012	0.0159854
41	ACCN2	0.3609	0.903036	0.00013	0.0160154
23431	AP4E1	0.3532	0.897005	0.00013	0.0160154
1564	CYP2D7P1	-0.363	-0.866844	0.00013	0.0160154
10748	KLRA1	-0.35565	-0.860043	0.00013	0.0160154
114823	LENG8	-0.35613	-0.860496	0.00013	0.0160154
80161	NCRNA00105	-0.36531	-0.868917	0.00013	0.0160154
6813	STXBP2	-0.3359	-0.840148	0.00013	0.0160154
200728	TMEM17	0.337	0.883141	0.00013	0.0160154
85378	TUBGCP6	-0.3637	-0.867475	0.00013	0.0160154
8233	ZRSR2	-0.3645	-0.868193	0.00013	0.0160154
146	ADRA1D	0.3551	0.898525	0.00014	0.0161542
283870	C16orf79	-0.361	-0.865024	0.00014	0.0161542
54991	C1orf159	-0.3499	-0.854499	0.00014	0.0161542
2634	GBP2	-0.32723	-0.830623	0.00014	0.0161542
155400	NSUN5P1	-0.3615	-0.865481	0.00014	0.0161542
23511	NUP188	0.3383	0.884315	0.00014	0.0161542
5016	OVGP1	-0.3397	-0.844167	0.00014	0.0161542
283970	PDXDC2	-0.3343	-0.838428	0.00014	0.0161542
9805	SCRN1	0.3345	0.880851	0.00014	0.0161542
654434	C17orf86	-0.3646	-0.868283	0.00015	0.016385
57035	C1orf63	-0.3505	-0.855087	0.00015	0.016385
92359	CRB3	-0.3484	-0.85302	0.00015	0.016385
84331	FAM195A	-0.3374	-0.841745	0.00015	0.016385
2679	GGT3P	-0.3495	-0.854106	0.00015	0.016385
100272146	LOC100272146	-0.361	-0.865024	0.00015	0.016385
10737	RFPL3S	-0.371	-0.873897	0.00015	0.016385
245711	SPDYA	-0.353	-0.857513	0.00015	0.016385
653268	AGAP7	-0.3627	-0.866572	0.00016	0.0165924
200539	ANKRD23	-0.3395	-0.843957	0.00016	0.0165924
1427	CRYGS	-0.3533	-0.857801	0.00016	0.0165924
3482	IGF2R	0.3391	0.885032	0.00016	0.0165924
23065	KIAA0090	0.3281	0.874796	0.00016	0.0165924
8764	TNFRSF14	-0.3504	-0.854989	0.00016	0.0165924
9534	ZNF254	-0.3322	-0.836145	0.00016	0.0165924
163255	ZNF540	-0.3517	-0.856256	0.00016	0.0165924
93953	ACRC	-0.3469	-0.851528	0.00017	0.0173009
1018	CDK3	-0.3541	-0.858568	0.00017	0.0173009
5555	PRH2	-0.34664	-0.851268	0.00017	0.0173009
414189	AGAP6	-0.3575	-0.861784	0.00018	0.0178745
360132	FKBP9L	0.3312	0.877764	0.00018	0.0178745
143458	LDLRAD3	0.34598	0.891029	0.00018	0.0178745
219402	MTIF3	-0.3372	-0.841533	0.00018	0.0178745
9878	TOX4	0.331	0.877575	0.00019	0.0187539
7919	BAT1	-0.3469	-0.851528	0.0002	0.0190523
1677	DFFB	-0.3415	-0.846038	0.0002	0.0190523
94104	GCFC1	-0.3285	-0.83205	0.0002	0.0190523
9170	LPAR2	-0.3497	-0.854303	0.0002	0.0190523
7593	MZF1	-0.3733	-0.875859	0.0002	0.0190523
6991	TCTE3	-0.3271	-0.830477	0.0002	0.0190523
79370	BCL2L14	-0.3272	-0.83059	0.00022	0.0204812
23085	ERC1	0.3355	0.881772	0.00022	0.0204812
2098	ESD	0.3075	0.853309	0.00022	0.0204812
7062	TCHH	0.34915	0.893692	0.00022	0.0204812
55769	ZNF83	-0.3355	-0.83972	0.00023	0.0212912
117155	CATSPER2	-0.3326	-0.836582	0.00024	0.0218467
149134	LOC149134	-0.3233	-0.826139	0.00024	0.0218467
55852	TEX2	0.33027	0.876881	0.00024	0.0218467
130872	AHSA2	-0.3443	-0.848907	0.00025	0.0221419
339210	C17orf67	-0.3296	-0.833277	0.00025	0.0221419
84342	COG8	0.3338	0.880202	0.00025	0.0221419
9775	EIF4A3	0.3196	0.866311	0.00025	0.0221419
6286	S100P	-0.3114	-0.811897	0.00025	0.0221419
813	CALU	0.34865	0.893276	0.00026	0.0224216
1345	COX6C	-0.3256	-0.828776	0.00026	0.0224216
2203	FBP1	-0.3238	-0.826715	0.00026	0.0224216
57698	KIAA1598	0.3301	0.876719	0.00026	0.0224216
5460	POU5F1	-0.3297	-0.833388	0.00026	0.0224216
23117	NPIPL3	-0.33605	-0.840308	0.00027	0.0230414
94005	PIGS	0.3359	0.882138	0.00027	0.0230414
80714	PBX4	-0.3168	-0.818485	0.00028	0.0235272
55779	WDR52	-0.3302	-0.833943	0.00028	0.0235272
51710	ZNF44	-0.306	-0.805096	0.00028	0.0235272
10256	CNKSR1	-0.3437	-0.848296	0.00029	0.0239982
4644	MYO5A	0.3362	0.882412	0.00029	0.0239982
8473	OGT	-0.3389	-0.843328	0.00029	0.0239982
9692	KIAA0391	0.3189	0.865589	0.0003	0.0244552
7955	STL	0.3195	0.866208	0.0003	0.0244552
729873	TBC1D3	-0.3363	-0.840575	0.0003	0.0244552
57654	KIAA1530	-0.3305	-0.834275	0.00031	0.0251453
22889	KIAA0907	-0.3398	-0.844271	0.00032	0.0253295
56954	NIT2	-0.3198	-0.822054	0.00032	0.0253295
9240	PNMA1	0.3118	0.858057	0.00032	0.0253295
90853	SPOCD1	-0.3159	-0.817401	0.00032	0.0253295
26140	TTLL3	-0.3398	-0.844271	0.00032	0.0253295
142891	SAMD8	0.316	0.862559	0.00033	0.0258711
6301	SARS	0.3191	0.865796	0.00033	0.0258711
84163	GTF2IRD2	-0.31704	-0.818773	0.00034	0.0262778
55191	NADSYN1	-0.341	-0.84552	0.00034	0.0262778
56114	PCDHGA1	0.332	0.878519	0.00034	0.0262778
54094	C21orf15	-0.3383	-0.842697	0.00035	0.0266733
10633	RASL10A	-0.31758	-0.819419	0.00035	0.0266733
6247	RS1	-0.3388	-0.843223	0.00035	0.0266733
81704	DOCK8	-0.3159	-0.817401	0.00037	0.0274319
440275	EIF2AK4	0.3277	0.874409	0.00037	0.0274319
79711	IPO4	0.3115	0.857731	0.00037	0.0274319
100216545	LOC100216545	-0.3206	-0.822995	0.00037	0.0274319
54103	PION	-0.31852	-0.820539	0.00037	0.0274319
442578	STAG3L3	-0.3217	-0.824282	0.00037	0.0274319
421	ARVCF	-0.3344	-0.838536	0.00038	0.0279206
9266	CYTH2	-0.32	-0.82229	0.00038	0.0279206
11132	CAPN10	-0.3486	-0.853218	0.00039	0.0281504
54923	LIME1	-0.3176	-0.819443	0.00039	0.0281504
85414	SLC45A3	-0.3109	-0.811276	0.00039	0.0281504
388121	TNFAIP8L3	0.315	0.861499	0.00039	0.0281504
2861	GPR37	0.343	0.888469	0.0004	0.0283723
83933	HDAC10	-0.3045	-0.803168	0.0004	0.0283723
728743	LOC728743	-0.3314	-0.835267	0.0004	0.0283723
27339	PRPF19	0.3165	0.863085	0.0004	0.0283723
8814	CDKL1	0.3133	0.85968	0.00041	0.0287088
23052	ENDOD1	0.3176	0.864238	0.00041	0.0287088
90864	SPSB3	-0.3329	-0.836909	0.00041	0.0287088
4642	MYO1D	0.3272	0.873922	0.00042	0.0291597
54093	SETD4	-0.3177	-0.819562	0.00042	0.0291597
221545	C6orf136	-0.3229	-0.825676	0.00043	0.0292346
51380	CSAD	-0.32554	-0.828708	0.00043	0.0292346
4609	MYC	0.3166	0.863191	0.00043	0.0292346
55170	PRMT6	0.3047	0.850138	0.00043	0.0292346
8858	PROZ	-0.337	-0.841321	0.00043	0.0292346
146439	CCDC64B	-0.3188	-0.820871	0.00044	0.0296683
3772	KCNJ15	-0.2936	-0.788642	0.00044	0.0296683
439921	MXRA7	0.2914	0.834202	0.00045	0.0300949
79739	TTLL7	0.3165	0.863085	0.00045	0.0300949
284618	C1orf104	-0.331	-0.834827	0.00046	0.0302695
10062	NR1H3	-0.32706	-0.830432	0.00046	0.0302695
5883	RAD9A	-0.3294	-0.833055	0.00046	0.0302695
860	RUNX2	0.3206	0.867336	0.00046	0.0302695
222161	DKFZP586I1420	-0.3212	-0.823698	0.00047	0.0305593
25865	PRKD2	-0.3376	-0.841957	0.00047	0.0305593
154214	RNF217	0.3145	0.860966	0.00047	0.0305593
221908	C7orf47	-0.2991	-0.796086	0.00048	0.0310862
801	CALM1	0.3174	0.864029	0.00049	0.0314849
9476	NAPSA	-0.2971	-0.793407	0.00049	0.0314849
9265	CYTH3	0.3015	0.846437	0.0005	0.0317732
129450	C2orf60	-0.3174	-0.819204	0.00051	0.0317732
84809	CROCCL1	-0.3232	-0.826023	0.00051	0.0317732
79961	DENND2D	-0.3218	-0.824399	0.00051	0.0317732
29998	GLTSCR1	-0.3245	-0.827519	0.00051	0.0317732
5378	PMS1	-0.3135	-0.814484	0.00051	0.0317732
5523	PPP2R3A	0.3061	0.851731	0.00051	0.0317732
55075	UACA	0.3116	0.85784	0.00051	0.0317732
730112	FAM166B	-0.308	-0.80764	0.00052	0.0317918
8495	PPFIBP2	-0.3196	-0.821818	0.00052	0.0317918
147699	PPM1N	-0.31	-0.810154	0.00052	0.0317918
23186	RCOR1	0.3149	0.861393	0.00052	0.0317918
6709	SPTAN1	0.3033	0.848529	0.00052	0.0317918
84513	PPAPDC1B	-0.3045	-0.803168	0.00053	0.0320445
25897	RNF19A	-0.3158	-0.817281	0.00053	0.0320445
84630	TTBK1	-0.3295	-0.833166	0.00053	0.0320445
8542	APOL1	-0.308	-0.80764	0.00055	0.0328896
9541	CIR1	-0.3112	-0.811649	0.00055	0.0328896
11198	SUPT16H	0.2959	0.839759	0.00055	0.0328896
493753	C2orf64	-0.2867	-0.778966	0.00056	0.0332449
338321	NLRP9	-0.3185	-0.820515	0.00056	0.0332449
1965	EIF2S1	0.293	0.836198	0.00057	0.0335951
94241	TP53INP1	-0.2998	-0.797017	0.00057	0.0335951
5462	POU5F1B	-0.3005	-0.797944	0.00058	0.0338012
735301	SNHG9	-0.3133	-0.814239	0.00058	0.0338012
2734	GLG1	0.3128	0.859141	0.00059	0.0338012
6928	HNF1B	-0.3214	-0.823932	0.00059	0.0338012
22824	HSPA4L	0.2883	0.830273	0.00059	0.0338012
55629	PNRC2	-0.2966	-0.792732	0.00059	0.0338012
83547	RILP	-0.31179	-0.81238	0.00059	0.0338012
283596	SNHG10	-0.3246	-0.827634	0.00059	0.0338012
388552	BLOC1S3	-0.2896	-0.783079	0.0006	0.0339
1506	CTRL	-0.3085	-0.808271	0.0006	0.0339
79659	DYNC2H1	0.2786	0.817425	0.0006	0.0339
9895	TECPR2	0.294	0.837434	0.0006	0.0339
149483	CCDC17	-0.3193	-0.821464	0.00061	0.0342289
79600	TCTN1	0.31626	0.862833	0.00061	0.0342289
79152	FA2H	-0.31362	-0.814631	0.00062	0.0344363
60681	FKBP10	0.31218	0.85847	0.00062	0.0344363
4071	TM4SF1	0.308829	0.854792	0.00062	0.0344363
80776	B9D2	-0.32433	-0.827324	0.00063	0.0347561
100302401	LOC100302401	0.2986	0.843012	0.00063	0.0347561
79161	C7orf23	-0.31105	-0.811463	0.00064	0.0350716
7569	ZNF182	-0.3009	-0.798471	0.00064	0.0350716
170689	ADAMTS15	0.2783	0.817014	0.00065	0.0351107
54344	DPM3	-0.3142	-0.815339	0.00065	0.0351107
8669	EIF3J	0.2883	0.830273	0.00066	0.0351107
3169	FOXA1	-0.3099	-0.810029	0.00066	0.0351107
8826	IQGAP1	0.3038	0.849106	0.00066	0.0351107
4803	NGF	0.3019	0.846905	0.00066	0.0351107
79031	PDCL3	-0.2936	-0.788642	0.00066	0.0351107
9047	SH2D2A	-0.2905	-0.784342	0.00066	0.0351107
28232	SLCO3A1	0.2947	0.838294	0.00066	0.0351107
253018	HCG27	-0.3132	-0.814116	0.00067	0.0351476
11283	CYP4F8	-0.3207	-0.823113	0.00068	0.0351476
5125	PCSK5	0.2878	0.829631	0.00068	0.0351476
5784	PTPN14	0.2994	0.843964	0.00068	0.0351476
6161	RPL32	-0.3078	-0.807387	0.00068	0.0351476
5055	SERPINB2	0.2929	0.836074	0.00068	0.0351476
7782	SLC30A4	0.3108	0.856966	0.00068	0.0351476
11260	XPOT	0.3139	0.860325	0.00068	0.0351476
254887	ZDHHC23	-0.326	-0.829231	0.00068	0.0351476
284805	C20orf203	-0.3238	-0.826715	0.00069	0.0354409
11328	FKBP9	0.3043	0.84968	0.00069	0.0354409
2072	ERCC4	0.3256	0.872354	0.0007	0.0358422
6687	SPG7	-0.3074	-0.80688	0.00071	0.0361284
54881	TEX10	0.3043	0.84968	0.00071	0.0361284
23603	CORO1C	0.3208	0.86754	0.00073	0.0366903
221078	NSUN6	-0.3078	-0.807387	0.00073	0.0366903
6443	SGCB	0.295	0.838662	0.00073	0.0366903
148213	ZNF681	-0.304	-0.802521	0.00073	0.0366903
90806	ANGEL2	-0.3219	-0.824515	0.00075	0.0374657
100132911	DPH3B	0.31481	0.861297	0.00075	0.0374657
844	CASQ1	-0.2969	-0.793137	0.00076	0.0375078
55592	GOLGA2B	-0.2912	-0.78532	0.00076	0.0375078
441531	PGAM4	0.28713	0.828768	0.00076	0.0375078
9043	SPAG9	0.2971	0.841212	0.00076	0.0375078
79810	PTCD2	0.2734	0.810183	0.00077	0.0377738
7152	TOP1P2	-0.3021	-0.800048	0.00077	0.0377738
7103	TSPAN8	-0.3153	-0.816676	0.00078	0.0381501
1981	EIF4G1	0.3078	0.853645	0.00079	0.0381833
57451	ODZ2	0.3022	0.847254	0.00079	0.0381833
114881	OSBPL7	-0.2957	-0.791513	0.00079	0.0381833
124923	SGK494	-0.3012	-0.798867	0.00079	0.0381833
8292	COLQ	-0.3117	-0.812268	0.0008	0.0384399
85028	SNHG12	-0.3138	-0.814851	0.0008	0.0384399
79969	C6orf134	-0.295	-0.79056	0.00081	0.0386934
55552	ZNF823	-0.3076	-0.807133	0.00081	0.0386934
147081	C17orf69	-0.3058	-0.804839	0.00082	0.0389672
113146	AHNAK2	0.3229	0.869667	0.00083	0.0389672
348110	C15orf38	0.2929	0.836074	0.00083	0.0389672
338799	LOC338799	-0.31753	-0.819359	0.00083	0.0389672
5364	PLXNB1	-0.3108	-0.811152	0.00083	0.0389672
51455	REV1	-0.3116	-0.812145	0.00083	0.0389672
26088	GGA1	-0.2992	-0.796219	0.00084	0.0390547
56113	PCDHGA2	0.3109	0.857075	0.00084	0.0390547
590	BCHE	0.3004	0.845146	0.00085	0.0390547
375341	C3orf62	-0.2852	-0.776811	0.00085	0.0390547
5256	PHKA2	-0.2949	-0.790423	0.00085	0.0390547
130557	ZNF513	-0.3008	-0.79834	0.00085	0.0390547
27106	ARRDC2	-0.2841	-0.77522	0.00086	0.0390547
80063	ATF7IP2	-0.2993	-0.796353	0.00086	0.0390547
79574	EPS8L3	-0.3276	-0.83104	0.00086	0.0390547
159090	FAM122B	-0.3017	-0.799524	0.00086	0.0390547
7594	ZNF43	-0.2978	-0.794348	0.00086	0.0390547
2580	GAK	-0.3232	-0.826023	0.00087	0.0390547
4133	MAP2	0.2904	0.832944	0.00087	0.0390547
80336	PABPC1L	-0.3065	-0.805734	0.00087	0.0390547
9810	RNF40	0.2927	0.835825	0.00087	0.0390547
51096	UTP18	0.3057	0.851277	0.00087	0.0390547
5653	KLK6	0.2941	0.837557	0.0009	0.0400611
35	ACADS	-0.29273	-0.787443	0.00091	0.0400611
347902	AMIGO2	-0.2764	-0.7638	0.00091	0.0400611
51148	CERCAM	0.2939	0.837311	0.00091	0.0400611
441089	LOC441089	0.2846	0.825472	0.00091	0.0400611
9814	SFI1	-0.31852	-0.820539	0.00091	0.0400611
79970	ZNF767	-0.3029	-0.801093	0.00091	0.0400611
2166	FAAH	-0.3015	-0.799261	0.00092	0.0400611
27134	TJP3	-0.3078	-0.807387	0.00093	0.0400611
163227	ZNF100	-0.2953	-0.790969	0.00093	0.0400611
79365	BHLHE41	-0.2982	-0.794884	0.00094	0.0400611
80022	MYO15B	-0.30342	-0.801769	0.00094	0.0400611
7442	TRPV1	-0.3035	-0.801873	0.00094	0.0400611
9948	WDR1	-0.3078	-0.807387	0.00094	0.0400611
284371	ZNF841	-0.2905	-0.784342	0.00094	0.0400611
30834	ZNRD1	-0.2817	-0.771713	0.00094	0.0400611
23403	FBXO46	-0.303	-0.801223	0.00095	0.0400611
23095	KIF1B	0.2807	0.820279	0.00095	0.0400611
54847	SIDT1	-0.2879	-0.780676	0.00095	0.0400611
284837	LOC284837	-0.2862	-0.77825	0.00096	0.0400611
6744	SSFA2	0.2891	0.831295	0.00096	0.0400611
80745	THUMPD2	-0.2921	-0.786571	0.00096	0.0400611
29766	TMOD3	0.3	0.844674	0.00096	0.0400611
84193	SETD3	0.281	0.820683	0.00097	0.0400611
23621	BACE1	0.3005	0.845264	0.00099	0.0400611
388407	C17orf82	-0.29267	-0.78736	0.00099	0.0400611
1956	EGFR	0.2973	0.841453	0.00099	0.0400611
23015	GOLGA8A	-0.307	-0.806371	0.00099	0.0400611
5387	PMS2L3	-0.2974	-0.793811	0.00099	0.0400611
79706	PRKRIP1	-0.2942	-0.789466	0.00099	0.0400611
80746	TSEN2	-0.2835	-0.774348	0.00099	0.0400611
55139	ANKZF1	-0.31008	-0.810254	0.001	0.0400611
11120	BTN2A1	-0.2889	-0.782093	0.001	0.0400611
79018	C17orf39	0.2904	0.832944	0.001	0.0400611
57639	CCDC146	-0.2957	-0.791513	0.001	0.0400611
23607	CD2AP	-0.298	-0.794616	0.001	0.0400611
1775	DNASE1L2	-0.3002	-0.797547	0.001	0.0400611
221442	LOC221442	-0.2887	-0.78181	0.001	0.0400611
55379	LRRC59	0.3156	0.862136	0.001	0.0400611
4820	NKTR	-0.3068	-0.806117	0.001	0.0400611
26015	RPAP1	0.30101	0.845863	0.001	0.0400611
79861	TUBAL3	0.2934	0.836693	0.001	0.0400611
150223	YDJC	-0.2951	-0.790696	0.001	0.0400611
730051	ZNF814	-0.3228	-0.82556	0.001	0.0400611
50807	ASAP1	0.2898	0.832184	0.0011	0.0414333
84657	C3orf42	-0.2846	-0.775945	0.0011	0.0414333
842	CASP9	-0.2855	-0.777244	0.0011	0.0414333
64770	CCDC14	-0.3073	-0.806753	0.0011	0.0414333
8533	COPS3	0.2758	0.813557	0.0011	0.0414333
100128285	DNM1P35	-0.2881	-0.78096	0.0011	0.0414333
285489	DOK7	-0.2962	-0.792191	0.0011	0.0414333
29057	FAM156A	-0.2968	-0.793002	0.0011	0.0414333
10527	IPO7	0.28875	0.830848	0.0011	0.0414333
3814	KISS1	-0.2999	-0.797149	0.0011	0.0414333
441208	LOC441208	0.29938	0.84394	0.0011	0.0414333
27258	LSM3	-0.275	-0.761671	0.0011	0.0414333
256691	MAMDC2	0.27546	0.813082	0.0011	0.0414333
4864	NPC1	0.28254	0.822746	0.0011	0.0414333
390916	NUDT19	-0.27663	-0.764148	0.0011	0.0414333
51585	PCF11	-0.3087	-0.808523	0.0011	0.0414333
23761	PISD	-0.301	-0.798603	0.0011	0.0414333
5576	PRKAR2A	0.2999	0.844556	0.0011	0.0414333
5699	PSMB10	-0.2872	-0.77968	0.0011	0.0414333
55647	RAB20	-0.2869	-0.779252	0.0011	0.0414333
9462	RASAL2	0.2939	0.837311	0.0011	0.0414333
27303	RBMS3	0.2942	0.83768	0.0011	0.0414333
641977	SEPT7P2	-0.29379	-0.788904	0.0011	0.0414333
8227	SFRS17A	-0.2978	-0.794348	0.0011	0.0414333
6729	SRP54	0.2899	0.832311	0.0011	0.0414333
7352	UCP3	-0.3029	-0.801093	0.0011	0.0414333
81792	ADAMTS12	0.2872	0.828858	0.0012	0.0435
80216	ALPK1	-0.2947	-0.79015	0.0012	0.0435
154810	AMOTL1	0.2876	0.829374	0.0012	0.0435
338440	ANO9	-0.2882	-0.781102	0.0012	0.0435
387837	CLEC12B	-0.3179	-0.819801	0.0012	0.0435
10175	CNIH	0.2715	0.807474	0.0012	0.0435
284004	HEXDC	-0.3102	-0.810404	0.0012	0.0435
3425	IDUA	-0.2883	-0.781244	0.0012	0.0435
3700	ITIH4	-0.2856	-0.777388	0.0012	0.0435
255252	LRRC57	0.2774	0.815776	0.0012	0.0435
4236	MFAP1	0.2948	0.838417	0.0012	0.0435
4938	OAS1	-0.294	-0.789192	0.0012	0.0435
56288	PARD3	0.2797	0.818925	0.0012	0.0435
5303	PIN4	-0.2798	-0.768903	0.0012	0.0435
83985	SPNS1	0.2974	0.841574	0.0012	0.0435
91875	TTC5	0.2755	0.813138	0.0012	0.0435
387328	ZNF322B	-0.2965	-0.792597	0.0012	0.0435
160428	ALDH1L2	0.2949	0.838539	0.0013	0.0447489
124401	ANKS3	-0.3067	-0.805989	0.0013	0.0447489
476	ATP1A1	0.2826	0.822826	0.0013	0.0447489
10331	B3GNT3	-0.2882	-0.781102	0.0013	0.0447489
80279	CDK5RAP3	-0.2958	-0.791648	0.0013	0.0447489
752014	CEMP1	-0.2987	-0.795553	0.0013	0.0447489
100037417	DDTL	-0.2807	-0.770238	0.0013	0.0447489
130589	GALM	-0.285	-0.776523	0.0013	0.0447489
8364	HIST1H4C	-0.2978	-0.794348	0.0013	0.0447489
3417	IDH1	-0.27189	-0.75688	0.0013	0.0447489
57536	KIAA1328	0.2741	0.811173	0.0013	0.0447489
29967	LRP12	0.28488	0.825839	0.0013	0.0447489
260425	MAGI3	0.2768	0.814947	0.0013	0.0447489
79957	PAQR6	-0.2803	-0.769646	0.0013	0.0447489
56128	PCDHB8	0.3036	0.848875	0.0013	0.0447489
8710	SERPINB7	0.2898	0.832184	0.0013	0.0447489
347051	SLC10A5	-0.2811	-0.770829	0.0013	0.0447489
6815	STYX	0.2814	0.821221	0.0013	0.0447489
25949	SYF2	-0.2873	-0.779822	0.0013	0.0447489
7045	TGFBI	0.3127	0.859033	0.0013	0.0447489
54868	TMEM104	0.2807	0.820279	0.0013	0.0447489
26043	UBXN7	0.2961	0.840002	0.0013	0.0447489
8975	USP13	0.2803	0.819738	0.0013	0.0447489
90592	ZNF700	-0.2785	-0.766964	0.0013	0.0447489
51363	CHST15	0.2921	0.835078	0.0014	0.0470061
1349	COX7B	-0.2734	-0.759216	0.0014	0.0470061
2625	GATA3	-0.2809	-0.770534	0.0014	0.0470061
165082	GPR113	-0.29415	-0.789397	0.0014	0.0470061
100144604	LOC100144604	-0.3115	-0.812021	0.0014	0.0470061
4628	MYH10	0.286	0.827303	0.0014	0.0470061
51567	TDP2	-0.2632	-0.743054	0.0014	0.0470061
79875	THSD4	0.2758	0.813557	0.0014	0.0470061
199746	U2AF1L4	-0.2835	-0.774348	0.0014	0.0470061
8633	UNC5C	0.2798	0.819061	0.0014	0.0470061
117166	WFIKKN1	-0.28773	-0.780435	0.0014	0.0470061
25937	WWTR1	0.2752	0.812719	0.0014	0.0470061
172	AFG3L1	-0.307	-0.806371	0.0015	0.0487649
308	ANXA5	0.2986	0.843012	0.0015	0.0487649
6361	CCL17	-0.274	-0.760139	0.0015	0.0487649
50624	CUZD1	-0.2886	-0.781668	0.0015	0.0487649
199974	CYP4Z1	-0.3077	-0.80726	0.0015	0.0487649
163720	CYP4Z2P	-0.3044	-0.803039	0.0015	0.0487649
22905	EPN2	0.2693	0.804293	0.0015	0.0487649
285512	FAM13AOS	-0.2865	-0.77868	0.0015	0.0487649
26270	FBXO6	-0.28508	-0.776638	0.0015	0.0487649
27333	GOLIM4	0.2907	0.833322	0.0015	0.0487649
440107	PLEKHG7	-0.302056	-0.79999	0.0015	0.0487649
729540	RGPD6	-0.2785	-0.766964	0.0015	0.0487649
9755	TBKBP1	-0.2766	-0.764103	0.0015	0.0487649
5987	TRIM27	-0.282	-0.772154	0.0015	0.0487649
7280	TUBB2A	0.2867	0.828211	0.0015	0.0487649
644353	ZCCHC18	-0.2845	-0.7758	0.0015	0.0487649
51205	ACP6	-0.26649	-0.748366	0.0016	0.0492782
8745	ADAM23	0.2838	0.824418	0.0016	0.0492782
636	BICD1	0.2821	0.822159	0.0016	0.0492782
9605	C16orf7	-0.2884	-0.781385	0.0016	0.0492782
285343	C3orf23	-0.2831	-0.773765	0.0016	0.0492782
116254	C6orf72	0.2811	0.820818	0.0016	0.0492782
286103	C8orf77	-0.2894	-0.782798	0.0016	0.0492782
11126	CD160	-0.27034	-0.754462	0.0016	0.0492782
1464	CSPG4	0.2893	0.831549	0.0016	0.0492782
1999	ELF3	-0.2825	-0.772887	0.0016	0.0492782
2058	EPRS	0.278	0.816602	0.0016	0.0492782
200350	FOXD4L1	-0.2881	-0.78096	0.0016	0.0492782
132158	GLYCTK	-0.2677	-0.750296	0.0016	0.0492782
9026	HIP1R	-0.2925	-0.787125	0.0016	0.0492782
51447	IP6K2	-0.2805	-0.769942	0.0016	0.0492782
23046	KIF21B	-0.2633	-0.743217	0.0016	0.0492782
151174	LOC151174	-0.2575	-0.733626	0.0016	0.0492782
51559	NT5DC3	0.2822	0.822292	0.0016	0.0492782
27445	PCLO	0.282	0.822025	0.0016	0.0492782
5213	PFKM	0.2969	0.840971	0.0016	0.0492782
5947	RBP1	0.2889	0.83104	0.0016	0.0492782
91695	RRP7B	-0.2923	-0.786848	0.0016	0.0492782
26040	SETBP1	0.2753	0.812859	0.0016	0.0492782
4091	SMAD6	-0.28287	-0.773429	0.0016	0.0492782
80705	TSGA10	-0.291	-0.785041	0.0016	0.0492782
27229	TUBGCP4	0.281	0.820683	0.0016	0.0492782
65125	WNK1	0.286	0.827303	0.0016	0.0492782
64397	ZFP106	0.2694	0.804439	0.0016	0.0492782
24	ABCA4	0.2615	0.792636	0.0017	0.0508294
10538	BATF	-0.2945	-0.789877	0.0017	0.0508294
2107	ETF1	0.2782	0.816877	0.0017	0.0508294
79441	HAUS3	-0.27729	-0.765145	0.0017	0.0508294
100130557	LOC100130557	-0.2982	-0.794884	0.0017	0.0508294
100131434	LOC100131434	-0.2921	-0.786571	0.0017	0.0508294
391322	LOC391322	-0.299497	-0.796614	0.0017	0.0508294
4649	MYO9A	0.293	0.836198	0.0017	0.0508294
133308	NHEDC2	0.2808	0.820414	0.0017	0.0508294
5049	PAFAH1B2	0.2872	0.828858	0.0017	0.0508294
25956	SEC31B	-0.2809	-0.770534	0.0017	0.0508294
25870	SUMF2	0.2672	0.801213	0.0017	0.0508294
6884	TAF13	0.2773	0.815638	0.0017	0.0508294
6875	TAF4B	0.2571	0.785793	0.0017	0.0508294
6899	TBX1	-0.2619	-0.740929	0.0017	0.0508294
7718	ZNF165	-0.2776	-0.765612	0.0017	0.0508294
280	AMY2B	-0.287	-0.779394	0.0018	0.0522
100128569	C19orf71	-0.2752	-0.761976	0.0018	0.0522
55286	C4orf19	-0.2887	-0.78181	0.0018	0.0522
1213	CLTC	0.28007	0.819427	0.0018	0.0522
203522	DDX26B	-0.2919	-0.786294	0.0018	0.0522
170384	FUT11	0.2786	0.817425	0.0018	0.0522
57657	HCN3	-0.29	-0.783641	0.0018	0.0522
3294	HSD17B2	-0.2681	-0.750931	0.0018	0.0522
3837	KPNB1	0.27758	0.816025	0.0018	0.0522
100133991	LOC100133991	-0.275	-0.761671	0.0018	0.0522
4131	MAP1B	0.2743	0.811455	0.0018	0.0522
5708	PSMD2	0.2853	0.826389	0.0018	0.0522
51548	SIRT6	-0.2728	-0.758291	0.0018	0.0522
55512	SMPD3	-0.2777	-0.765763	0.0018	0.0522
163050	ZNF564	-0.2786	-0.767113	0.0018	0.0522
27332	ZNF638	-0.27724	-0.76507	0.0018	0.0522
9406	ZRANB2	-0.2658	-0.74726	0.0018	0.0522
8906	AP1G2	-0.2864	-0.778536	0.0019	0.0531254
23299	BICD2	0.2766	0.81467	0.0019	0.0531254
55571	C2orf29	-0.279	-0.767711	0.0019	0.0531254
8911	CACNA1I	-0.2887	-0.78181	0.0019	0.0531254
81576	CCDC130	-0.2771	-0.764859	0.0019	0.0531254
284001	CCDC57	-0.2953	-0.790969	0.0019	0.0531254
1196	CLK2	-0.279	-0.767711	0.0019	0.0531254
1622	DBI	-0.27103	-0.755541	0.0019	0.0531254
1716	DGUOK	-0.2686	-0.751723	0.0019	0.0531254
1893	ECM1	0.27315	0.809829	0.0019	0.0531254
2120	ETV6	-0.2767	-0.764254	0.0019	0.0531254
158584	FAAH2	-0.2777	-0.765763	0.0019	0.0531254
440101	FLJ12825	-0.2842	-0.775365	0.0019	0.0531254
2967	GTF2H3	0.28224	0.822346	0.0019	0.0531254
8338	HIST2H2AC	-0.2578	-0.734129	0.0019	0.0531254
11020	IFT27	-0.2869	-0.779252	0.0019	0.0531254
55227	LRRC1	-0.2803	-0.769646	0.0019	0.0531254
130576	LYPD6B	-0.281	-0.770682	0.0019	0.0531254
4124	MAN2A1	0.28034	0.819792	0.0019	0.0531254
84879	MFSD2A	-0.2685	-0.751565	0.0019	0.0531254
5790	PTPRCAP	-0.268	-0.750772	0.0019	0.0531254
10551	AGR2	-0.27203	-0.757098	0.002	0.054255
57828	CATSPERG	-0.2693	-0.752828	0.002	0.054255
23220	DTX4	-0.2813	-0.771124	0.002	0.054255
89846	FGD3	-0.28681	-0.779123	0.002	0.054255
399717	FLJ45983	-0.2784	-0.766814	0.002	0.054255
401375	GTF2IRD2P1	-0.27387	-0.75994	0.002	0.054255
26508	HEYL	0.271	0.806755	0.002	0.054255
54914	KIAA1797	0.2661	0.799583	0.002	0.054255
55243	KIRREL	0.2755	0.813138	0.002	0.054255
51678	MPP6	0.263	0.794925	0.002	0.054255
56108	PCDHGA7	0.2723	0.808619	0.002	0.054255
56103	PCDHGB2	0.268	0.802392	0.002	0.054255
140700	SAMD10	-0.291	-0.785041	0.002	0.054255
10609	SC65	0.2741	0.811173	0.002	0.054255
7979	SHFM1	-0.2785	-0.766964	0.002	0.054255
126259	TMIGD2	-0.2587	-0.735635	0.002	0.054255
80305	TRABD	-0.2793	-0.768159	0.002	0.054255
7767	ZNF224	-0.2768	-0.764406	0.002	0.054255
51703	ACSL5	-0.2782	-0.766514	0.0021	0.0554976
314	AOC2	-0.268	-0.750772	0.0021	0.0554976
2000	ELF4	-0.272	-0.757051	0.0021	0.0554976
84895	FAM73B	-0.2826	-0.773034	0.0021	0.0554976
80789	INTS5	0.26864	0.80333	0.0021	0.0554976
8645	KCNK5	-0.26189	-0.740913	0.0021	0.0554976
114785	MBD6	-0.2726	-0.757981	0.0021	0.0554976
147650	NCRNA00085	-0.2525	-0.725115	0.0021	0.0554976
8974	P4HA2	0.2789	0.817835	0.0021	0.0554976
84900	RNFT2	-0.2679	-0.750614	0.0021	0.0554976
148418	SAMD13	-0.2519	-0.724079	0.0021	0.0554976
6714	SRC	-0.2697	-0.753458	0.0021	0.0554976
6399	TRAPPC2	-0.2905	-0.784342	0.0021	0.0554976
7289	TULP3	0.2856	0.826781	0.0021	0.0554976
7294	TXK	-0.2573	-0.73329	0.0021	0.0554976
10224	ZNF443	-0.2804	-0.769794	0.0021	0.0554976
27	ABL2	0.2641	0.796588	0.0022	0.0567669
51382	ATP6V1D	0.252	0.777613	0.0022	0.0567669
200197	C1orf126	-0.2973	-0.793676	0.0022	0.0567669
1021	CDK6	0.2765	0.814531	0.0022	0.0567669
401232	DKFZP686I15217	-0.2719	-0.756896	0.0022	0.0567669
23360	FNBP4	-0.2769	-0.764557	0.0022	0.0567669
5019	OXCT1	0.26359	0.795819	0.0022	0.0567669
22984	PDCD11	0.2657	0.798987	0.0022	0.0567669
10622	POLR3G	0.2663	0.79988	0.0022	0.0567669
201562	PTPLB	0.2849	0.825866	0.0022	0.0567669
221035	REEP3	0.2598	0.790015	0.0022	0.0567669
6812	STXBP1	0.2731	0.809758	0.0022	0.0567669
340252	ZNF680	-0.2633	-0.743217	0.0022	0.0567669
285989	ZNF789	-0.2798	-0.768903	0.0022	0.0567669
90576	ZNF799	-0.2662	-0.747902	0.0022	0.0567669
10123	ARL4C	0.2736	0.810466	0.0023	0.0577113
388799	C20orf107	-0.2644	-0.745003	0.0023	0.0577113
901	CCNG2	-0.2721	-0.757206	0.0023	0.0577113
1195	CLK1	-0.27231	-0.757532	0.0023	0.0577113
66002	CYP4F12	-0.2807	-0.770238	0.0023	0.0577113
2303	FOXC2	0.2833	0.823756	0.0023	0.0577113
8087	FXR1	0.26669	0.800459	0.0023	0.0577113
10243	GPHN	0.2653	0.79839	0.0023	0.0577113
55716	LMBR1L	-0.27037	-0.754509	0.0023	0.0577113
2063	NR2F6	-0.2808	-0.770386	0.0023	0.0577113
6340	SCNN1G	-0.2749	-0.761518	0.0023	0.0577113
57147	SCYL3	-0.2748	-0.761365	0.0023	0.0577113
56904	SH3GLB2	-0.2901	-0.783782	0.0023	0.0577113
51547	SIRT7	-0.2789	-0.767562	0.0023	0.0577113
6625	SNRNP70	-0.289	-0.782234	0.0023	0.0577113
8460	TPST1	0.2677	0.801951	0.0023	0.0577113
199223	TTC21A	-0.28	-0.769201	0.0023	0.0577113
7508	XPC	-0.2752	-0.761976	0.0023	0.0577113
23192	ATG4B	-0.293	-0.787816	0.0024	0.0583442
79667	FLJ13197	-0.275	-0.761671	0.0024	0.0583442
610	HCN2	0.2789	0.817835	0.0024	0.0583442
3695	ITGB7	-0.257	-0.732785	0.0024	0.0583442
9027	NAT8	-0.28543	-0.777143	0.0024	0.0583442
283981	NCRNA00107	-0.2721	-0.757206	0.0024	0.0583442
28511	NKIRAS2	0.2639	0.796287	0.0024	0.0583442
169611	OLFML2A	0.27233	0.808662	0.0024	0.0583442
8566	PDXK	-0.2593	-0.736634	0.0024	0.0583442
5223	PGAM1	0.261	0.791868	0.0024	0.0583442
51131	PHF11	-0.2595	-0.736967	0.0024	0.0583442
55771	PRR11	0.2888	0.830912	0.0024	0.0583442
100130889	PSORS1C3	-0.2933	-0.78823	0.0024	0.0583442
56961	SHD	-0.2985	-0.795286	0.0024	0.0583442
59307	SIGIRR	-0.2739	-0.759986	0.0024	0.0583442
161497	STRC	-0.2802	-0.769497	0.0024	0.0583442
10312	TCIRG1	-0.2652	-0.746295	0.0024	0.0583442
29796	UQCR10	-0.2701	-0.754086	0.0024	0.0583442
23559	WBP1	-0.2709	-0.755338	0.0024	0.0583442
6375	XCL1	-0.2809	-0.770534	0.0024	0.0583442
92822	ZNF276	-0.2954	-0.791105	0.0024	0.0583442
150248	C22orf15	-0.274055	-0.760224	0.0025	0.0591089
55345	C4orf21	-0.27762	-0.765642	0.0025	0.0591089
839	CASP6	-0.2782	-0.766514	0.0025	0.0591089
11072	DUSP14	0.27669	0.814795	0.0025	0.0591089
3992	FADS1	0.2731	0.809758	0.0025	0.0591089
2342	FNTB	0.2471	0.769498	0.0025	0.0591089
10114	HIPK3	0.281	0.820683	0.0025	0.0591089
3376	IARS	0.2689	0.80371	0.0025	0.0591089
57724	KIAA1632	0.2642	0.796739	0.0025	0.0591089
80298	MTERFD3	-0.25628	-0.73157	0.0025	0.0591089
4522	MTHFD1	0.2507	0.775485	0.0025	0.0591089
126006	PCP2	-0.2796	-0.768606	0.0025	0.0591089
10279	PRSS16	-0.2595	-0.736967	0.0025	0.0591089
5797	PTPRM	-0.269	-0.752355	0.0025	0.0591089
57127	RHBG	-0.2743	-0.7606	0.0025	0.0591089
51188	SS18L2	-0.2516	-0.723559	0.0025	0.0591089
143425	SYT9	-0.2697	-0.753458	0.0025	0.0591089
8711	TNK1	-0.274	-0.760139	0.0025	0.0591089
114791	TUBGCP5	0.2657	0.798987	0.0025	0.0591089
9034	CCRL2	-0.2619	-0.740929	0.0026	0.059917
53981	CPSF2	0.2501	0.774496	0.0026	0.059917
56474	CTPS2	-0.2581	-0.734632	0.0026	0.059917
8661	EIF3A	0.2687	0.803418	0.0026	0.059917
25929	GEMIN5	0.2678	0.802098	0.0026	0.059917
283464	GXYLT1	-0.2639	-0.744192	0.0026	0.059917
767811	H2BFXP	-0.2706	-0.754869	0.0026	0.059917
81932	HDHD3	-0.2686	-0.751723	0.0026	0.059917
55540	IL17RB	-0.2776	-0.765612	0.0026	0.059917
129531	MITD1	-0.2477	-0.716731	0.0026	0.059917
11223	MST1P9	-0.2549	-0.729228	0.0026	0.059917
51471	NAT8B	-0.2708	-0.755182	0.0026	0.059917
11136	SLC7A9	-0.2771	-0.764859	0.0026	0.059917
84958	SYTL1	-0.27294	-0.758507	0.0026	0.059917
6909	TBX2	-0.2686	-0.751723	0.0026	0.059917
55092	TMEM51	-0.2801	-0.769349	0.0026	0.059917
146057	TTBK2	0.2786	0.817425	0.0026	0.059917
79968	WDR76	0.2703	0.805745	0.0026	0.059917
47	ACLY	0.2736	0.810466	0.0027	0.0601898
84266	ALKBH7	-0.2768	-0.764406	0.0027	0.0601898
286076	BREA2	-0.2507	-0.721996	0.0027	0.0601898
9578	CDC42BPB	0.2738	0.810749	0.0027	0.0601898
64084	CLSTN2	0.2746	0.811877	0.0027	0.0601898
1266	CNN3	0.2832	0.823623	0.0027	0.0601898
1417	CRYBB3	-0.26637	-0.748174	0.0027	0.0601898
57062	DDX24	0.2539	0.780692	0.0027	0.0601898
2051	EPHB6	-0.2595	-0.736967	0.0027	0.0601898
10146	G3BP1	0.2594	0.789395	0.0027	0.0601898
79709	GLT25D1	0.2785	0.817288	0.0027	0.0601898
55764	IFT122	0.2598	0.790015	0.0027	0.0601898
150776	LOC150776	-0.2755	-0.762433	0.0027	0.0601898
401052	LOC401052	-0.2664	-0.748222	0.0027	0.0601898
4130	MAP1A	0.2705	0.806034	0.0027	0.0601898
29116	MYLIP	-0.2761	-0.763345	0.0027	0.0601898
7181	NR2C1	-0.2631	-0.742891	0.0027	0.0601898
132299	OCIAD2	-0.2688	-0.752039	0.0027	0.0601898
222171	PRR15	-0.27124	-0.755869	0.0027	0.0601898
11137	PWP1	0.2734	0.810183	0.0027	0.0601898
10180	RBM6	-0.2613	-0.739944	0.0027	0.0601898
7092	TLL1	0.2729	0.809474	0.0027	0.0601898
55687	TRMU	-0.2794	-0.768308	0.0027	0.0601898
7644	ZNF91	-0.2703	-0.754399	0.0027	0.0601898
55082	ARGLU1	-0.2815	-0.771419	0.0028	0.0615812
114819	CROCCL2	-0.2735	-0.75937	0.0028	0.0615812
85458	DIXDC1	0.2517	0.777123	0.0028	0.0615812
2119	ETV5	0.2691	0.804002	0.0028	0.0615812
114787	GPRIN1	0.2782	0.816877	0.0028	0.0615812
3614	IMPDH1	0.2875	0.829245	0.0028	0.0615812
390595	LOC390595	-0.2811	-0.770829	0.0028	0.0615812
4862	NPAS2	-0.2761	-0.763345	0.0028	0.0615812
26751	SH3YL1	-0.267219	-0.74953	0.0028	0.0615812
29114	TAGLN3	0.2754	0.812999	0.0028	0.0615812
521	ATP5I	-0.2763	-0.763649	0.0029	0.0628525
116828	CG030	-0.25072	-0.722031	0.0029	0.0628525
84062	DTNBP1	-0.2577	-0.733961	0.0029	0.0628525
283229	EFCAB4A	-0.2658	-0.74726	0.0029	0.0628525
401720	FIGNL2	-0.2558	-0.730757	0.0029	0.0628525
2643	GCH1	-0.2745	-0.760906	0.0029	0.0628525
253430	IPMK	0.2694	0.804439	0.0029	0.0628525
4898	NRD1	0.2424	0.761473	0.0029	0.0628525
8406	SRPX	0.2804	0.819874	0.0029	0.0628525
440423	SUZ12P	-0.2622	-0.741421	0.0029	0.0628525
124961	ZFP3	-0.275	-0.761671	0.0029	0.0628525
220004	C11orf66	-0.2588	-0.735802	0.003	0.0635899
25819	CCRN4L	0.2598	0.790015	0.003	0.0635899
90353	CTU1	-0.2559	-0.730927	0.003	0.0635899
9681	DEPDC5	-0.2607	-0.738955	0.003	0.0635899
2137	EXTL3	0.25	0.774331	0.003	0.0635899
64855	FAM129B	0.2587	0.788304	0.003	0.0635899
221914	GPC2	-0.2604	-0.738459	0.003	0.0635899
283050	LOC283050	-0.2613	-0.739944	0.003	0.0635899
91450	LOC91450	-0.2642	-0.744679	0.003	0.0635899
58496	LY6G5B	-0.2821	-0.772301	0.003	0.0635899
9463	PICK1	-0.2672	-0.7495	0.003	0.0635899
5468	PPARG	-0.2551	-0.729569	0.003	0.0635899
8000	PSCA	-0.2721	-0.757206	0.003	0.0635899
137902	PXDNL	0.26015	0.790557	0.003	0.0635899
79102	RNF26	0.2575	0.786423	0.003	0.0635899
132241	RPL32P3	-0.2659	-0.74742	0.003	0.0635899
84124	ZNF394	-0.2703	-0.754399	0.003	0.0635899
790	CAD	0.2727	0.809189	0.0031	0.0647876
63922	CHTF18	-0.262	-0.741093	0.0031	0.0647876
1659	DHX8	0.2594	0.789395	0.0031	0.0647876
2073	ERCC5	-0.2529	-0.725804	0.0031	0.0647876
780776	FAM18A	-0.251476	-0.723344	0.0031	0.0647876
9957	HS3ST1	-0.2641	-0.744517	0.0031	0.0647876
8549	LGR5	-0.2642	-0.744679	0.0031	0.0647876
5604	MAP2K1	0.26669	0.800459	0.0031	0.0647876
256471	MFSD8	-0.28044	-0.769853	0.0031	0.0647876
440456	PLEKHM1P	-0.28	-0.769201	0.0031	0.0647876
27324	TOX3	-0.262	-0.741093	0.0031	0.0647876
22900	CARD8	-0.2653	-0.746456	0.0032	0.0661185
246175	CNOT6L	-0.2562	-0.731435	0.0032	0.0661185
2970	GTF2IP1	-0.265	-0.745972	0.0032	0.0661185
642826	LOC642826	-0.2715	-0.756274	0.0032	0.0661185
4782	NFIC	0.2662	0.799732	0.0032	0.0661185
57486	NLN	0.28059	0.82013	0.0032	0.0661185
196463	PLBD2	0.25322	0.779594	0.0032	0.0661185
151295	SLC23A3	-0.2626	-0.742075	0.0032	0.0661185
92305	TMEM129	-0.2687	-0.751881	0.0032	0.0661185
116285	ACSM1	-0.267	-0.749181	0.0033	0.067085
781	CACNA2D1	0.26023	0.790681	0.0033	0.067085
53944	CSNK1G1	0.26409	0.796573	0.0033	0.067085
1778	DYNC1H1	0.2489	0.772508	0.0033	0.067085
57704	GBA2	-0.2709	-0.755338	0.0033	0.067085
2773	GNAI3	0.28296	0.823305	0.0033	0.067085
84056	KATNAL1	0.2688	0.803564	0.0033	0.067085
3831	KLC1	0.2502	0.774661	0.0033	0.067085
728758	LOC728758	-0.2511	-0.722692	0.0033	0.067085
4810	NHS	-0.255	-0.729399	0.0033	0.067085
5110	PCMT1	0.2604	0.790944	0.0033	0.067085
9028	RHBDL1	-0.259	-0.736135	0.0033	0.067085
1731	2015-09-01	-0.2537	-0.727178	0.0033	0.067085
79025	C20orf195	-0.2572	-0.733121	0.0034	0.0680208
9188	DDX21	0.2681	0.802538	0.0034	0.0680208
152877	FAM53A	-0.2512	-0.722866	0.0034	0.0680208
378805	FLJ43663	-0.25258	-0.725253	0.0034	0.0680208
5349	FXYD3	-0.2585	-0.735301	0.0034	0.0680208
387273	KRTAP5-10	-0.3007	-0.798208	0.0034	0.0680208
100101266	LOC100101266	-0.2609	-0.739285	0.0034	0.0680208
730668	LOC730668	-0.2874	-0.779965	0.0034	0.0680208
114884	OSBPL10	0.25777	0.786848	0.0034	0.0680208
5616	PRKY	-0.408	-0.902197	0.0034	0.0680208
54765	TRIM44	0.2603	0.790789	0.0034	0.0680208
284443	ZNF493	-0.2591	-0.736302	0.0034	0.0680208
84765	ZNF577	-0.2509	-0.722344	0.0034	0.0680208
153642	ARSK	0.26432	0.79692	0.0035	0.069428
219293	ATAD3C	-0.2604	-0.738459	0.0035	0.069428
400242	FLJ45244	-0.2761	-0.763345	0.0035	0.069428
9329	GTF3C4	0.2589	0.788616	0.0035	0.069428
6818	SULT1A3	-0.2678	-0.750455	0.0035	0.069428
22906	TRAK1	-0.266	-0.747581	0.0035	0.069428
147808	ZNF784	-0.2765	-0.763952	0.0035	0.069428
140680	C20orf96	-0.2405	-0.703756	0.0036	0.0700546
391267	C21orf81	-0.272	-0.757051	0.0036	0.0700546
149473	CCDC24	-0.26533	-0.746504	0.0036	0.0700546
84771	DDX11L2	-0.2469	-0.715314	0.0036	0.0700546
10144	FAM13A	-0.25735	-0.733374	0.0036	0.0700546
3682	ITGAE	-0.2447	-0.711384	0.0036	0.0700546
4324	MMP15	-0.2546	-0.728717	0.0036	0.0700546
5050	PAFAH1B3	-0.2503	-0.721299	0.0036	0.0700546
56112	PCDHGA3	0.2615	0.792636	0.0036	0.0700546
5287	PIK3C2B	-0.2679	-0.750614	0.0036	0.0700546
22874	PLEKHA6	-0.271	-0.755494	0.0036	0.0700546
27111	SDCBP2	-0.2561	-0.731266	0.0036	0.0700546
619189	SERINC4	-0.2616	-0.740437	0.0036	0.0700546
7773	ZNF230	-0.2585	-0.735301	0.0036	0.0700546
55900	ZNF302	-0.26552	-0.74681	0.0036	0.0700546
643641	ZNF862	-0.2722	-0.757362	0.0036	0.0700546
784	CACNB3	-0.2529	-0.725804	0.0037	0.0713229
1124	CHN2	-0.246	-0.713711	0.0037	0.0713229
8526	DGKE	-0.2662	-0.747902	0.0037	0.0713229
11184	MAP4K1	-0.2568	-0.732448	0.0037	0.0713229
4853	NOTCH2	0.2662	0.799732	0.0037	0.0713229
5566	PRKACA	0.2618	0.793096	0.0037	0.0713229
5878	RAB5C	0.2641	0.796588	0.0037	0.0713229
84501	SPIRE2	-0.2572	-0.733121	0.0037	0.0713229
55064	C9orf68	-0.2659	-0.74742	0.0038	0.0725676
9343	EFTUD2	0.26691	0.800785	0.0038	0.0725676
28996	HIPK2	0.25835	0.787757	0.0038	0.0725676
54741	LEPROT	0.262	0.793402	0.0038	0.0725676
23162	MAPK8IP3	-0.2678	-0.750455	0.0038	0.0725676
80224	NUBPL	0.2526	0.778589	0.0038	0.0725676
11171	STRAP	0.2584	0.787835	0.0038	0.0725676
64393	ZMAT3	0.2594	0.789395	0.0038	0.0725676
283848	CES8	-0.25093	-0.722396	0.0039	0.0737893
79958	DENND1C	-0.259	-0.736135	0.0039	0.0737893
1773	DNASE1	-0.2551	-0.729569	0.0039	0.0737893
22845	DOLK	0.24911	0.772857	0.0039	0.0737893
3656	IRAK2	-0.264	-0.744355	0.0039	0.0737893
10899	JTB	-0.2615	-0.740273	0.0039	0.0737893
55238	SLC38A7	0.252	0.777613	0.0039	0.0737893
169841	ZNF169	-0.2509	-0.722344	0.0039	0.0737893
79602	ADIPOR2	0.24829	0.771492	0.004	0.074732
634	CEACAM1	-0.2418	-0.706135	0.004	0.074732
1639	DCTN1	0.2472	0.769666	0.004	0.074732
619190	FDPSL2A	-0.2612	-0.739779	0.004	0.074732
3851	KRT4	0.2552	0.782777	0.004	0.074732
84859	LRCH3	0.24665	0.76874	0.004	0.074732
4258	MGST2	-0.2582	-0.734799	0.004	0.074732
90507	SCRN2	-0.2579	-0.734297	0.004	0.074732
58533	SNX6	0.2437	0.763716	0.004	0.074732
55706	TMEM48	0.264	0.796438	0.004	0.074732
10906	TRAFD1	-0.2574	-0.733458	0.004	0.074732
2957	GTF2A1	0.2499	0.774166	0.0041	0.0759079
3176	HNMT	-0.2501	-0.72095	0.0041	0.0759079
6885	MAP3K7	0.2587	0.788304	0.0041	0.0759079
5425	POLD2	0.2477	0.770505	0.0041	0.0759079
124221	PRSS30P	-0.2629	-0.742565	0.0041	0.0759079
54958	TMEM160	-0.2635	-0.743543	0.0041	0.0759079
7366	UGT2B15	-0.2733	-0.759062	0.0041	0.0759079
57677	ZFP14	-0.2613	-0.739944	0.0041	0.0759079
340485	ACER2	-0.2648	-0.745649	0.0042	0.0770627
55856	ACOT13	-0.2342	-0.692004	0.0042	0.0770627
240	ALOX5	-0.2679	-0.750614	0.0042	0.0770627
338657	CCDC84	-0.2649	-0.745811	0.0042	0.0770627
23059	CLUAP1	0.2535	0.780047	0.0042	0.0770627
100270804	LOC100270804	-0.2629	-0.742565	0.0042	0.0770627
4779	NFE2L1	0.2595	0.78955	0.0042	0.0770627
113835	ZNF257	-0.2573	-0.73329	0.0042	0.0770627
304	ANXA2P2	0.2572	0.785951	0.0043	0.0780238
382	ARF6	0.2553	0.782937	0.0043	0.0780238
23092	ARHGAP26	-0.2541	-0.727863	0.0043	0.0780238
441381	LRRC24	-0.2575	-0.733626	0.0043	0.0780238
255738	PCSK9	0.2419	0.760605	0.0043	0.0780238
5569	PKIA	-0.2444	-0.710844	0.0043	0.0780238
148811	PM20D1	-0.2502	-0.721124	0.0043	0.0780238
23433	RHOQ	-0.238	-0.699138	0.0043	0.0780238
84669	USP32	0.27	0.80531	0.0043	0.0780238
7769	ZNF226	-0.2646	-0.745326	0.0043	0.0780238
54443	ANLN	0.261088	0.792004	0.0044	0.0786194
55321	C20orf46	-0.2394	-0.701732	0.0044	0.0786194
200933	FBXO45	0.2644	0.79704	0.0044	0.0786194
2768	GNA12	0.2561	0.78421	0.0044	0.0786194
3224	HOXC8	0.2782	0.816877	0.0044	0.0786194
83729	INHBE	0.2381	0.753921	0.0044	0.0786194
3852	KRT5	0.2542	0.781175	0.0044	0.0786194
27040	LAT	-0.2503	-0.721299	0.0044	0.0786194
9603	NFE2L3	-0.2398	-0.702469	0.0044	0.0786194
6330	SCN4B	0.242	0.760779	0.0044	0.0786194
10484	SEC23A	0.2655	0.798689	0.0044	0.0786194
55346	TCP11L1	0.246	0.767641	0.0044	0.0786194
3371	TNC	0.2639	0.796287	0.0044	0.0786194
151613	TTC14	-0.248625	-0.718364	0.0044	0.0786194
127707	KLHDC7A	-0.2595	-0.736967	0.0045	0.0793676
83742	MARVELD1	0.2496	0.77367	0.0045	0.0793676
23263	MCF2L	-0.24129	-0.705204	0.0045	0.0793676
4696	NDUFA3	-0.2587	-0.735635	0.0045	0.0793676
4800	NFYA	-0.2507	-0.721996	0.0045	0.0793676
10775	POP4	-0.26194	-0.740995	0.0045	0.0793676
9364	RAB28	-0.2456	-0.712997	0.0045	0.0793676
60485	SAV1	0.2513	0.776469	0.0045	0.0793676
22950	SLC4A1AP	0.2503	0.774826	0.0045	0.0793676
6676	SPAG4	-0.2542	-0.728034	0.0045	0.0793676
9668	ZNF432	-0.2643	-0.744841	0.0045	0.0793676
7562	ZNF708	-0.2498	-0.720425	0.0045	0.0793676
83636	C19orf12	-0.25278	-0.725598	0.0046	0.0803529
57680	CHD8	0.24096	0.758966	0.0046	0.0803529
92421	CHMP4C	-0.2642	-0.744679	0.0046	0.0803529
160364	CLEC12A	-0.2433	-0.70886	0.0046	0.0803529
128338	DRAM2	-0.2372	-0.697647	0.0046	0.0803529
3280	HES1	-0.2389	-0.700807	0.0046	0.0803529
143888	KDELC2	0.25205	0.777695	0.0046	0.0803529
64284	RAB17	-0.2538	-0.72735	0.0046	0.0803529
6801	STRN	0.26495	0.797866	0.0046	0.0803529
29121	CLEC2D	-0.2523	-0.72477	0.0047	0.0814054
55705	IPO9	0.2531	0.7794	0.0047	0.0814054
388588	LOC388588	-0.2483	-0.717791	0.0047	0.0814054
9890	LPPR4	0.2457	0.767132	0.0047	0.0814054
9584	RBM39	-0.25634	-0.731671	0.0047	0.0814054
134549	SHROOM1	-0.2531	-0.726149	0.0047	0.0814054
54469	ZFAND6	-0.2365	-0.696338	0.0047	0.0814054
57232	ZNF630	-0.2466	-0.71478	0.0047	0.0814054
84803	AGPAT9	0.2399	0.757107	0.0048	0.0820104
201283	AMZ2P1	-0.2375	-0.698207	0.0048	0.0820104
256329	C11orf35	-0.2576	-0.733794	0.0048	0.0820104
55262	C7orf43	-0.2478	-0.716908	0.0048	0.0820104
10202	DHRS2	-0.2348	-0.69314	0.0048	0.0820104
25975	EGFL6	-0.2483	-0.717791	0.0048	0.0820104
79760	GEMIN7	-0.2517	-0.723733	0.0048	0.0820104
9670	IPO13	0.2451	0.766112	0.0048	0.0820104
64432	MRPS25	-0.2445	-0.711024	0.0048	0.0820104
9649	RALGPS1	-0.2568	-0.732448	0.0048	0.0820104
57521	RPTOR	0.2458	0.767302	0.0048	0.0820104
125058	TBC1D16	0.261	0.791868	0.0048	0.0820104
10781	ZNF266	-0.2532	-0.72632	0.0048	0.0820104
828	CAPS	-0.259	-0.736135	0.0049	0.0829406
50509	COL5A3	0.25359	0.780192	0.0049	0.0829406
51200	CPA4	0.2412	0.759386	0.0049	0.0829406
283459	GATC	0.2574	0.786266	0.0049	0.0829406
440295	GOLGA6L9	-0.2684	-0.751406	0.0049	0.0829406
23408	SIRT5	-0.25034	-0.721369	0.0049	0.0829406
6674	SPAG1	-0.2619	-0.740929	0.0049	0.0829406
10188	TNK2	-0.26	-0.737797	0.0049	0.0829406
23093	TTLL5	0.2296	0.738386	0.0049	0.0829406
282566	C21orf71	-0.2459	-0.713533	0.005	0.084285
91283	C9orf30	0.28491	0.825879	0.005	0.084285
7726	TRIM26	-0.239	-0.700992	0.005	0.084285
11074	TRIM31	-0.2433	-0.70886	0.005	0.084285
138199	C9orf41	0.2486	0.772009	0.0051	0.0849223
57666	FBRSL1	-0.2484	-0.717967	0.0051	0.0849223
10644	IGF2BP2	0.2483	0.771509	0.0051	0.0849223
11128	POLR3A	0.2427	0.761992	0.0051	0.0849223
8045	RASSF7	-0.2555	-0.730249	0.0051	0.0849223
6164	RPL34	-0.2545	-0.728547	0.0051	0.0849223
49855	SCAPER	0.25	0.774331	0.0051	0.0849223
6493	SIM2	-0.2321	-0.688003	0.0051	0.0849223
442590	SPDYE5	-0.2497	-0.72025	0.0051	0.0849223
8577	TMEFF1	0.2589	0.788616	0.0051	0.0849223
8718	TNFRSF25	-0.2584	-0.735134	0.0051	0.0849223
153657	TTC23L	-0.2445	-0.711024	0.0051	0.0849223
284992	CCDC150	-0.2662	-0.747902	0.0052	0.0855442
121006	FAM186A	-0.2622	-0.741421	0.0052	0.0855442
55766	H2AFJ	-0.248	-0.717262	0.0052	0.0855442
3339	HSPG2	0.2426	0.761819	0.0052	0.0855442
253724	LOC253724	-0.2393	-0.701547	0.0052	0.0855442
345193	LRIT3	-0.2539	-0.727521	0.0052	0.0855442
2122	MECOM	-0.2516	-0.723559	0.0052	0.0855442
10001	MED6	0.2408	0.758686	0.0052	0.0855442
339344	MYPOP	-0.2487	-0.718496	0.0052	0.0855442
146279	TEKT5	-0.2517	-0.723733	0.0052	0.0855442
81622	UNC93B1	-0.2624	-0.741748	0.0052	0.0855442
90338	ZNF160	-0.25238	-0.724908	0.0052	0.0855442
60489	APOBEC3G	-0.2337	-0.691055	0.0053	0.0859807
200232	C20orf106	-0.26481	-0.745666	0.0053	0.0859807
1050	CEBPA	-0.2309	-0.685697	0.0053	0.0859807
285464	CRIPAK	-0.2559	-0.730927	0.0053	0.0859807
2202	EFEMP1	0.2443	0.764746	0.0053	0.0859807
2796	GNRH1	-0.25581	-0.730774	0.0053	0.0859807
151009	LOC151009	-0.2352	-0.693895	0.0053	0.0859807
130574	LYPD6	-0.2378	-0.698766	0.0053	0.0859807
4097	MAFG	0.2441	0.764403	0.0053	0.0859807
126147	NTN5	-0.2471	-0.715669	0.0053	0.0859807
5427	POLE2	0.2474	0.770002	0.0053	0.0859807
23759	PPIL2	-0.25531	-0.729926	0.0053	0.0859807
256126	SYCE2	-0.24667	-0.714905	0.0053	0.0859807
80818	ZNF436	-0.2375	-0.698207	0.0053	0.0859807
404550	C16orf74	-0.2437	-0.709583	0.0054	0.0864897
165679	C3orf57	-0.2407	-0.704123	0.0054	0.0864897
1824	DSC2	0.2563	0.784528	0.0054	0.0864897
1950	EGF	0.2329	0.744514	0.0054	0.0864897
2121	EVC	0.2451	0.766112	0.0054	0.0864897
83856	FSD1L	0.2511	0.776141	0.0054	0.0864897
2696	GIPR	-0.26151	-0.740289	0.0054	0.0864897
3998	LMAN1	0.248	0.771007	0.0054	0.0864897
90411	MCFD2	0.2433	0.763028	0.0054	0.0864897
56104	PCDHGB1	0.2571	0.785793	0.0054	0.0864897
56254	RNF20	0.2422	0.761126	0.0054	0.0864897
80725	SRCIN1	-0.2532	-0.72632	0.0054	0.0864897
147166	TRIM16L	0.2498	0.774001	0.0054	0.0864897
10060	ABCC9	0.2507	0.775485	0.0055	0.0866514
80210	ARMC9	0.23606	0.750266	0.0055	0.0866514
283987	C17orf28	-0.2599	-0.737631	0.0055	0.0866514
151195	CCNYL1	0.2538	0.780531	0.0055	0.0866514
55086	CXorf57	-0.2237	-0.671573	0.0055	0.0866514
285193	DUSP28	-0.2463	-0.714246	0.0055	0.0866514
283314	LOC283314	-0.24695	-0.715402	0.0055	0.0866514
389791	LOC389791	-0.2672	-0.7495	0.0055	0.0866514
79157	MFSD11	0.2593	0.789239	0.0055	0.0866514
5532	PPP3CB	0.23232	0.743446	0.0055	0.0866514
55334	SLC39A9	0.2476	0.770337	0.0055	0.0866514
255104	TMCO4	-0.2537	-0.727178	0.0055	0.0866514
55245	UQCC	-0.2422	-0.706864	0.0055	0.0866514
51776	ZAK	0.2483	0.771509	0.0055	0.0866514
25850	ZNF345	-0.2521	-0.724425	0.0055	0.0866514
55311	ZNF444	-0.2699	-0.753772	0.0055	0.0866514
440515	ZNF506	-0.2432	-0.708679	0.0055	0.0866514
79684	C11orf61	-0.2452	-0.712281	0.0056	0.0875534
146705	C17orf56	-0.2505	-0.721648	0.0056	0.0875534
202781	LOC202781	-0.24801	-0.717279	0.0056	0.0875534
93622	LOC93622	-0.24874	-0.718566	0.0056	0.0875534
89941	RHOT2	-0.264	-0.744355	0.0056	0.0875534
79897	RPP21	-0.24106	-0.704783	0.0056	0.0875534
6840	SVIL	0.23652	0.751094	0.0056	0.0875534
445347	TARP	-0.2493	-0.71955	0.0056	0.0875534
51566	ARMCX3	-0.2371	-0.697461	0.0057	0.0877768
339201	C17orf65	-0.2617	-0.740601	0.0057	0.0877768
55150	C19orf73	-0.2223	-0.668768	0.0057	0.0877768
65260	C1orf163	0.242	0.760779	0.0057	0.0877768
388969	C2orf68	-0.2436	-0.709402	0.0057	0.0877768
79577	CDC73	0.26218	0.793676	0.0057	0.0877768
55308	DDX19A	0.247	0.769329	0.0057	0.0877768
23768	FLRT2	0.2613	0.792329	0.0057	0.0877768
93487	MAPK1IP1L	0.243	0.762511	0.0057	0.0877768
51199	NIN	0.2402	0.757634	0.0057	0.0877768
5289	PIK3C3	0.2397	0.756754	0.0057	0.0877768
5793	PTPRG	0.235	0.748349	0.0057	0.0877768
8869	ST3GAL5	-0.243	-0.708316	0.0057	0.0877768
55858	TMEM165	-0.2481	-0.717438	0.0057	0.0877768
51427	ZNF107	-0.24033	-0.703444	0.0057	0.0877768
257101	ZNF683	-0.2362	-0.695776	0.0057	0.0877768
65985	AACS	0.2351	0.74853	0.0058	0.0880751
80830	APOL6	-0.2374	-0.698021	0.0058	0.0880751
199800	C19orf76	-0.26572	-0.747131	0.0058	0.0880751
339883	C3orf35	-0.2357	-0.694836	0.0058	0.0880751
339942	C3orf47	-0.2476	-0.716555	0.0058	0.0880751
56260	C8orf44	-0.2442	-0.710484	0.0058	0.0880751
9940	DLEC1	-0.2534	-0.726664	0.0058	0.0880751
9988	DMTF1	-0.25322	-0.726355	0.0058	0.0880751
8939	FUBP3	0.2428	0.762165	0.0058	0.0880751
2817	GPC1	0.2461	0.76781	0.0058	0.0880751
3908	LAMA2	0.2365	0.751058	0.0058	0.0880751
22854	NTNG1	0.26101	0.791884	0.0058	0.0880751
5980	REV3L	0.23365	0.745889	0.0058	0.0880751
9321	TRIP11	0.2342	0.746894	0.0058	0.0880751
51377	UCHL5	0.26142	0.792514	0.0058	0.0880751
57827	C6orf47	-0.24867	-0.718443	0.0059	0.0890982
645811	CCDC154	-0.2446	-0.711204	0.0059	0.0890982
1595	CYP51A1	0.2406	0.758336	0.0059	0.0890982
23420	NOMO1	0.2293	0.737823	0.0059	0.0890982
54458	PRR13	-0.2524	-0.724943	0.0059	0.0890982
126068	ZNF441	-0.2474	-0.7162	0.0059	0.0890982
56052	ALG1	0.2576	0.78658	0.006	0.0892916
55668	C14orf118	0.23824	0.75417	0.006	0.0892916
51372	CCDC72	-0.2369	-0.697087	0.006	0.0892916
80034	CSRNP3	0.255873	0.783849	0.006	0.0892916
30836	DNTTIP2	0.23	0.739135	0.006	0.0892916
26035	GLCE	0.2362	0.750518	0.006	0.0892916
374443	LOC374443	-0.24129	-0.705204	0.006	0.0892916
10962	MLLT11	0.246	0.767641	0.006	0.0892916
374354	NHLRC2	0.252	0.777613	0.006	0.0892916
56952	PRTFDC1	0.2508	0.775649	0.006	0.0892916
6240	RRM1	0.2432	0.762856	0.006	0.0892916
200010	SLC5A9	-0.2498	-0.720425	0.006	0.0892916
4087	SMAD2	0.235	0.748349	0.006	0.0892916
92017	SNX29	0.2336	0.745798	0.006	0.0892916
163590	TOR1AIP2	0.2402	0.757634	0.006	0.0892916
7551	ZNF3	-0.2365	-0.696338	0.006	0.0892916
8537	BCAS1	-0.2525	-0.725115	0.0061	0.0897204
147685	C19orf18	-0.2386	-0.700252	0.0061	0.0897204
54749	EPDR1	0.25068	0.775452	0.0061	0.0897204
2241	FER	0.24684	0.76906	0.0061	0.0897204
163782	KANK4	0.2598	0.790015	0.0061	0.0897204
23608	MKRN1	-0.2341	-0.691815	0.0061	0.0897204
79854	NCRNA00115	-0.2527	-0.72546	0.0061	0.0897204
94103	ORMDL3	-0.2415	-0.705587	0.0061	0.0897204
63977	PRDM15	-0.2377	-0.69858	0.0061	0.0897204
8631	SKAP1	-0.2315	-0.686852	0.0061	0.0897204
27348	TOR1B	0.2345	0.74744	0.0061	0.0897204
1787	TRDMT1	0.232041	0.742931	0.0061	0.0897204
399669	ZNF321	-0.2598	-0.737465	0.0061	0.0897204
10301	DLEU1	0.2322	0.743224	0.0062	0.090541
728024	LOC728024	0.2531	0.7794	0.0062	0.090541
64428	NARFL	-0.2559	-0.730927	0.0062	0.090541
51251	NT5C3	-0.2351	-0.693706	0.0062	0.090541
149041	RC3H1	-0.25181	-0.723923	0.0062	0.090541
79989	TTC26	0.23835	0.754365	0.0062	0.090541
59348	ZNF350	-0.2233	-0.670773	0.0062	0.090541
284370	ZNF615	-0.2408	-0.704307	0.0062	0.090541
55755	CDK5RAP2	0.2362	0.750518	0.0063	0.09135
285429	DCAF4L1	-0.23696	-0.697199	0.0063	0.09135
2730	GCLM	0.2456	0.766962	0.0063	0.09135
401474	SAMD12	-0.2466	-0.71478	0.0063	0.09135
9913	SUPT7L	-0.24	-0.702837	0.0063	0.09135
27242	TNFRSF21	-0.2458	-0.713354	0.0063	0.09135
27037	TRMT2A	-0.26582	-0.747292	0.0063	0.09135
168374	ZNF92	-0.228	-0.680069	0.0063	0.09135
23201	FAM168A	0.2424	0.761473	0.0064	0.091986
9848	MFAP3L	-0.233	-0.689723	0.0064	0.091986
23598	PATZ1	-0.24947	-0.719848	0.0064	0.091986
5591	PRKDC	0.24975	0.773918	0.0064	0.091986
94081	SFXN1	0.2386	0.754809	0.0064	0.091986
93624	TADA2B	-0.2568	-0.732448	0.0064	0.091986
112858	TP53RK	-0.2199	-0.663915	0.0064	0.091986
55205	ZNF532	0.24797	0.770957	0.0064	0.091986
79898	ZNF613	-0.2299	-0.683766	0.0064	0.091986
7620	ZNF69	-0.2407	-0.704123	0.0064	0.091986
84987	C12orf62	-0.2418	-0.706135	0.0065	0.0930153
10521	DDX17	-0.255	-0.729399	0.0065	0.0930153
642846	LOC642846	-0.24597	-0.713658	0.0065	0.0930153
10230	NBR2	-0.233	-0.689723	0.0065	0.0930153
284266	SIGLEC15	-0.2482	-0.717615	0.0065	0.0930153
1340	COX6B1	-0.2409	-0.70449	0.0066	0.0938286
10640	EXOC5	0.2364	0.750878	0.0066	0.0938286
100126793	GHRLOS	-0.2303	-0.684539	0.0066	0.0938286
283284	IGSF22	-0.2442	-0.710484	0.0066	0.0938286
79849	PDZD3	-0.2606	-0.738789	0.0066	0.0938286
57799	RAB40C	-0.23407	-0.691758	0.0066	0.0938286
170960	ZNF721	-0.2505	-0.721648	0.0066	0.0938286
26033	ATRNL1	0.2418	0.760431	0.0067	0.0938286
831	CAST	0.2418	0.760431	0.0067	0.0938286
51496	CTDSPL2	0.2463	0.768149	0.0067	0.0938286
84663	CYorf15B	-0.4331	-0.917848	0.0067	0.0938286
65990	FAM173A	-0.2616	-0.740437	0.0067	0.0938286
79675	FASTKD1	-0.2594	-0.736801	0.0067	0.0938286
116123	FMO9P	-0.2471	-0.715669	0.0067	0.0938286
94234	FOXQ1	-0.242	-0.706499	0.0067	0.0938286
3020	H3F3A	-0.24803	-0.717315	0.0067	0.0938286
26034	IPCEF1	-0.2457	-0.713176	0.0067	0.0938286
26227	PHGDH	0.2451	0.766112	0.0067	0.0938286
54899	PXK	0.2404	0.757985	0.0067	0.0938286
25914	RTTN	0.243	0.762511	0.0067	0.0938286
25957	SFRS18	-0.2481	-0.717438	0.0067	0.0938286
6566	SLC16A1	0.2409	0.758861	0.0067	0.0938286
6712	SPTBN2	0.2482	0.771342	0.0067	0.0938286
7697	ZNF138	-0.2354	-0.694272	0.0067	0.0938286
9183	ZW10	0.246555	0.768579	0.0067	0.0938286
1415	CRYBB2	-0.2485	-0.718143	0.0068	0.0945823
392465	GLOD5	-0.258	-0.734464	0.0068	0.0945823
57475	PLEKHH1	-0.2487	-0.718496	0.0068	0.0945823
5621	PRNP	0.2498	0.774001	0.0068	0.0945823
165918	RNF168	0.2467	0.768824	0.0068	0.0945823
6711	SPTBN1	0.243	0.762511	0.0068	0.0945823
7263	TST	-0.2343	-0.692194	0.0068	0.0945823
6846	XCL2	-0.2417	-0.705953	0.0068	0.0945823
87	ACTN1	0.2412	0.759386	0.0069	0.0948461
201176	ARHGAP27	-0.2359	-0.695212	0.0069	0.0948461
140893	C20orf151	-0.2546	-0.728717	0.0069	0.0948461
84226	C2orf16	0.2356	0.749436	0.0069	0.0948461
85027	C5orf62	0.2392	0.755872	0.0069	0.0948461
80867	HCG2P7	-0.2719	-0.756896	0.0069	0.0948461
10473	HMGN4	-0.23401	-0.691644	0.0069	0.0948461
3397	ID1	-0.235	-0.693517	0.0069	0.0948461
25953	PNKD	-0.2292	-0.682408	0.0069	0.0948461
642658	SCXB	-0.2327	-0.68915	0.0069	0.0948461
221400	TDRD6	-0.2462	-0.714068	0.0069	0.0948461
7730	ZNF177	-0.2387	-0.700437	0.0069	0.0948461
10472	ZNF238	-0.2421	-0.706682	0.0069	0.0948461
147657	ZNF480	-0.2316	-0.687044	0.0069	0.0948461
285598	ARL10	0.2334	0.745431	0.007	0.0956589
114036	C21orf82	-0.2343	-0.692194	0.007	0.0956589
158055	C9orf163	-0.2371	-0.697461	0.007	0.0956589
11080	DNAJB4	0.2273	0.734042	0.007	0.0956589
26249	KLHL3	-0.2425	-0.707409	0.007	0.0956589
5763	PTMS	0.237	0.751956	0.007	0.0956589
127253	TYW3	0.2194	0.718653	0.007	0.0956589
79949	C10orf81	-0.229	-0.682019	0.0071	0.0962229
342184	FMN1	0.2243	0.728284	0.0071	0.0962229
9535	GMFG	-0.2453	-0.71246	0.0071	0.0962229
51574	LARP7	-0.2337	-0.691055	0.0071	0.0962229
5453	POU3F1	-0.2397	-0.702285	0.0071	0.0962229
84268	RPAIN	-0.2442	-0.710484	0.0071	0.0962229
57515	SERINC1	0.2437	0.763716	0.0071	0.0962229
169166	SNX31	-0.23578	-0.694987	0.0071	0.0962229
606551	UBE2MP1	0.2217	0.723209	0.0071	0.0962229
55888	ZNF167	-0.231337	-0.686538	0.0071	0.0962229
80127	C14orf45	0.2396	0.756578	0.0072	0.0968571
91304	C19orf6	-0.2376	-0.698393	0.0072	0.0968571
92342	C1orf156	-0.24123	-0.705094	0.0072	0.0968571
55330	CNO	-0.2334	-0.690485	0.0072	0.0968571
114928	GPRASP2	0.2215	0.722815	0.0072	0.0968571
3663	IRF5	-0.2354	-0.694272	0.0072	0.0968571
9381	OTOF	-0.2393	-0.701547	0.0072	0.0968571
80320	SP6	-0.2263	-0.676731	0.0072	0.0968571
29799	YPEL1	-0.2359	-0.695212	0.0072	0.0968571
259173	ALS2CL	-0.227	-0.678109	0.0073	0.0973234
112487	C14orf126	0.2386	0.754809	0.0073	0.0973234
113177	C19orf36	-0.2411	-0.704856	0.0073	0.0973234
84869	CBR4	-0.23254	-0.688845	0.0073	0.0973234
148170	CDC42EP5	-0.2315	-0.686852	0.0073	0.0973234
1410	CRYAB	0.2292	0.737635	0.0073	0.0973234
23549	DNPEP	-0.2339	-0.691435	0.0073	0.0973234
3949	LDLR	0.2277	0.734802	0.0073	0.0973234
7841	MOGS	-0.2323	-0.688386	0.0073	0.0973234
60436	TGIF2	-0.2417	-0.705953	0.0073	0.0973234
90987	ZNF251	-0.2267	-0.677519	0.0073	0.0973234
122481	AK7	0.2243	0.728284	0.0074	0.0977815
8702	B4GALT4	-0.2372	-0.697647	0.0074	0.0977815
11094	C9orf7	-0.2342	-0.692004	0.0074	0.0977815
25792	CIZ1	0.2402	0.757634	0.0074	0.0977815
80157	CWH43	0.2532	0.779562	0.0074	0.0977815
8372	HYAL3	0.2306	0.740256	0.0074	0.0977815
79629	OCEL1	-0.2384	-0.699881	0.0074	0.0977815
56125	PCDHB11	0.25242	0.778297	0.0074	0.0977815
5139	PDE3A	0.239	0.755518	0.0074	0.0977815
64600	PLA2G2F	-0.2371	-0.697461	0.0074	0.0977815
100131998	RRN3P3	-0.2349	-0.693329	0.0074	0.0977815
131583	FAM43A	0.2358	0.749797	0.0075	0.0985465
338785	KRT79	0.2467	0.768824	0.0075	0.0985465
2956	MSH6	0.2435	0.763372	0.0075	0.0985465
59343	SENP2	0.2455	0.766793	0.0075	0.0985465
51092	SIDT2	0.23394	0.746419	0.0075	0.0985465
51042	ZNF593	-0.2409	-0.70449	0.0075	0.0985465
284390	ZNF763	-0.2385	-0.700066	0.0075	0.0985465
388389	CCDC103	0.2306	0.740256	0.0076	0.0996208
55223	TRIM62	-0.2431	-0.708498	0.0076	0.0996208
55063	ZCWPW1	-0.22731	-0.678717	0.0076	0.0996208
157	ADRBK2	-0.2304	-0.684733	0.0077	0.100131
166	AES	-0.245	-0.711922	0.0077	0.100131
394	ARHGAP5	0.23789	0.753546	0.0077	0.100131
55160	ARHGEF10L	-0.2528	-0.725632	0.0077	0.100131
1830	DSG3	0.2468	0.768993	0.0077	0.100131
5092	PCBD1	-0.2376	-0.698393	0.0077	0.100131
5351	PLOD1	0.2404	0.757985	0.0077	0.100131
677777	SCARNA12	-0.23029	-0.68452	0.0077	0.100131
10507	SEMA4D	-0.2391	-0.701177	0.0077	0.100131
57711	ZNF529	-0.2339	-0.691435	0.0077	0.100131
824	CAPN2	0.2368	0.751597	0.0078	0.100632
960	CD44	0.2479	0.77084	0.0078	0.100632
1327	COX4I1	-0.2497	-0.72025	0.0078	0.100632
440270	GOLGA8B	-0.2397	-0.702285	0.0078	0.100632
9108	MTMR7	-0.2332	-0.690104	0.0078	0.100632
114880	OSBPL6	0.2465	0.768487	0.0078	0.100632
7422	VEGFA	-0.2304	-0.684733	0.0078	0.100632
375690	WASH5P	-0.2409	-0.70449	0.0078	0.100632
49856	WDR8	-0.2368	-0.6969	0.0078	0.100632
79818	ZNF552	-0.2544	-0.728376	0.0078	0.100632
11041	B3GNT1	0.2232	0.726146	0.0079	0.101523
54984	PINX1	0.2379	0.753564	0.0079	0.101523
401494	PTPLAD2	0.2362	0.750518	0.0079	0.101523
10638	SPHAR	-0.2553	-0.729909	0.0079	0.101523
11169	WDHD1	0.2322	0.743224	0.0079	0.101523
131566	DCBLD2	0.254	0.780853	0.008	0.102167
57662	KIAA1543	-0.2344	-0.692383	0.008	0.102167
55700	MAP7D1	0.23449	0.747422	0.008	0.102167
57380	MRS2	-0.2171	-0.658181	0.008	0.102167
284739	NCRNA00176	-0.2332	-0.690104	0.008	0.102167
8620	NPFF	-0.2455	-0.712818	0.008	0.102167
166815	TIGD2	-0.2431	-0.708498	0.008	0.102167
148203	ZNF738	-0.2249	-0.673962	0.008	0.102167
284459	HKR1	-0.2255	-0.675151	0.0081	0.103042
23008	KLHDC10	0.244	0.764232	0.0081	0.103042
91750	LIN52	0.2251	0.729829	0.0081	0.103042
11054	OGFR	-0.2254	-0.674953	0.0081	0.103042
9400	RECQL5	-0.2448	-0.711563	0.0081	0.103042
23536	ADAT1	0.2257	0.730984	0.0082	0.103591
113	ADCY7	0.2395	0.756402	0.0082	0.103591
55326	AGPAT5	0.2231	0.725951	0.0082	0.103591
2859	GPR35	-0.22211	-0.668386	0.0082	0.103591
100130933	LOC100130933	-0.2536	-0.727007	0.0082	0.103591
5803	PTPRZ1	0.2462	0.767979	0.0082	0.103591
60626	RIC8A	0.2373	0.752493	0.0082	0.103591
170082	TCEANC	-0.2344	-0.692383	0.0082	0.103591
79905	TMC7	-0.2412	-0.705039	0.0082	0.103591
192669	EIF2C3	0.222131	0.724056	0.0083	0.104371
10013	HDAC6	-0.2374	-0.698021	0.0083	0.104371
57462	KIAA1161	0.2278	0.734991	0.0083	0.104371
3991	LIPE	-0.2426	-0.707591	0.0083	0.104371
9618	TRAF4	-0.2286	-0.68124	0.0083	0.104371
79692	ZNF322A	-0.2351	-0.693706	0.0083	0.104371
286967	NCRNA00204B	-0.2424	-0.707227	0.0084	0.105225
56110	PCDHGA5	0.2338	0.746163	0.0084	0.105225
150962	PUS10	-0.2435	-0.709221	0.0084	0.105225
51075	TMX2	0.2369	0.751777	0.0084	0.105225
57209	ZNF248	-0.2445	-0.711024	0.0084	0.105225
126075	CCDC159	-0.2356	-0.694648	0.0085	0.105911
79850	FAM57A	0.22812	0.735598	0.0085	0.105911
389524	GTF2IRD2B	-0.23038	-0.684694	0.0085	0.105911
729082	LOC729082	0.2296	0.738386	0.0085	0.105911
10110	SGK2	-0.2305	-0.684926	0.0085	0.105911
134429	STARD4	0.2293	0.737823	0.0085	0.105911
64129	TINAGL1	-0.2262	-0.676534	0.0085	0.105911
51008	ASCC1	0.23034	0.739771	0.0086	0.10638
79656	BEND5	-0.21813	-0.660299	0.0086	0.10638
150590	C2orf15	-0.2445	-0.711024	0.0086	0.10638
123099	DEGS2	-0.23651	-0.696357	0.0086	0.10638
1785	DNM2	-0.2299	-0.683766	0.0086	0.10638
2218	FKTN	0.221	0.721829	0.0086	0.10638
10038	PARP2	0.236	0.750158	0.0086	0.10638
57761	TRIB3	0.2318	0.742485	0.0086	0.10638
9472	AKAP6	0.2191	0.718054	0.0087	0.10638
401251	C6orf26	-0.2469	-0.715314	0.0087	0.10638
10486	CAP2	0.2295	0.738198	0.0087	0.10638
9946	CRYZL1	-0.2108	-0.644998	0.0087	0.10638
283742	FAM98B	0.2222	0.724191	0.0087	0.10638
2621	GAS6	0.2291	0.737447	0.0087	0.10638
55502	HES6	-0.22491	-0.673982	0.0087	0.10638
3993	LLGL2	-0.2373	-0.697834	0.0087	0.10638
4311	MME	0.2405	0.758161	0.0087	0.10638
11143	MYST2	0.22319	0.726127	0.0087	0.10638
9063	PIAS2	0.2259	0.731368	0.0087	0.10638
399512	SLC25A35	-0.2366	-0.696526	0.0087	0.10638
10548	TM9SF1	0.22275	0.725268	0.0087	0.10638
11257	TP53TG1	-0.2368	-0.6969	0.0087	0.10638
79573	TTC13	-0.243004	-0.708324	0.0087	0.10638
9652	TTC37	0.2242	0.72809	0.0087	0.10638
10628	TXNIP	-0.2332	-0.690104	0.0087	0.10638
37	ACADVL	-0.2429	-0.708135	0.0088	0.106964
7915	ALDH5A1	-0.2315	-0.686852	0.0088	0.106964
84164	ASCC2	-0.247	-0.715491	0.0088	0.106964
51250	C6orf203	-0.2206	-0.665336	0.0088	0.106964
3069	HDLBP	0.23796	0.753671	0.0088	0.106964
53832	IL20RA	-0.2287	-0.681435	0.0088	0.106964
5238	PGM3	0.2351	0.74853	0.0088	0.106964
64121	RRAGC	0.2407	0.758511	0.0088	0.106964
9114	ATP6V0D1	0.2449	0.765771	0.0089	0.107701
64430	C14orf135	0.2254	0.730407	0.0089	0.107701
79016	DDA1	-0.2322	-0.688194	0.0089	0.107701
2310	FOXO3B	0.2317	0.7423	0.0089	0.107701
29954	POMT2	0.2478	0.770673	0.0089	0.107701
23214	XPO6	0.2278	0.734991	0.0089	0.107701
340075	ARSI	0.2432	0.762856	0.009	0.10851
65108	MARCKSL1	-0.238	-0.699138	0.009	0.10851
114822	RHPN1	-0.24	-0.702837	0.009	0.10851
29896	TRA2A	-0.2546	-0.728717	0.009	0.10851
100125288	ZGLP1	-0.2353	-0.694083	0.009	0.10851
255057	C19orf26	0.2205	0.72084	0.0091	0.109233
100132247	LOC100132247	-0.242	-0.706499	0.0091	0.109233
129530	LYG1	-0.2286	-0.68124	0.0091	0.109233
79668	PARP8	-0.23254	-0.688845	0.0091	0.109233
54776	PPP1R12C	-0.24709	-0.715651	0.0091	0.109233
29800	ZDHHC1	0.214541	0.708823	0.0091	0.109233
8913	CACNA1G	0.2332	0.745065	0.0092	0.109471
646300	COL6A4P2	-0.2336	-0.690865	0.0092	0.109471
10129	FRY	-0.2234	-0.670973	0.0092	0.109471
352961	HCG26	-0.2153	-0.654455	0.0092	0.109471
26275	HIBCH	-0.2299	-0.683766	0.0092	0.109471
26128	KIAA1279	0.2236	0.726925	0.0092	0.109471
123169	LEO1	0.2223	0.724387	0.0092	0.109471
4035	LRP1	0.2225	0.724779	0.0092	0.109471
158056	MAMDC4	-0.2405	-0.703756	0.0092	0.109471
26502	NARF	-0.2366	-0.696526	0.0092	0.109471
5929	RBBP5	0.2386	0.754809	0.0092	0.109471
6726	SRP9	-0.2372	-0.697647	0.0092	0.109471
10263	CDK2AP2	-0.23138	-0.686621	0.0093	0.109943
1398	CRK	0.2346	0.747622	0.0093	0.109943
54905	CYP2W1	0.223	0.725756	0.0093	0.109943
23109	DDN	0.24292	0.762372	0.0093	0.109943
8663	EIF3C	0.23	0.739135	0.0093	0.109943
4698	NDUFA5	-0.2135	-0.650696	0.0093	0.109943
9409	PEX16	-0.2295	-0.68299	0.0093	0.109943
267002	PGBD2	-0.237	-0.697274	0.0093	0.109943
80149	ZC3H12A	-0.23189	-0.6876	0.0093	0.109943
3460	IFNGR2	-0.2213	-0.666753	0.0094	0.110635
3783	KCNN4	-0.2297	-0.683378	0.0094	0.110635
79070	KDELC1	0.2482	0.771342	0.0094	0.110635
284232	LOC284232	-0.23	-0.683959	0.0094	0.110635
153478	PLEKHG4B	0.2347	0.747804	0.0094	0.110635
220082	SPERT	-0.23758	-0.698356	0.0094	0.110635
22926	ATF6	0.23	0.739135	0.0095	0.110635
219670	ENKUR	0.2402	0.757634	0.0095	0.110635
2298	FOXD4	-0.2413	-0.705222	0.0095	0.110635
100129726	LOC100129726	-0.2188	-0.661672	0.0095	0.110635
8828	NRP2	0.23328	0.745211	0.0095	0.110635
57139	RGL3	-0.2311	-0.686083	0.0095	0.110635
11322	TMC6	-0.22043	-0.664991	0.0095	0.110635
91544	UBXN11	-0.2411	-0.704856	0.0095	0.110635
26152	ZNF337	-0.2396	-0.702101	0.0095	0.110635
594	BCKDHB	-0.2238	-0.671772	0.0096	0.110635
8851	CDK5R1	0.2452	0.766282	0.0096	0.110635
9391	CIAO1	-0.22296	-0.670093	0.0096	0.110635
54677	CROT	-0.2353	-0.694083	0.0096	0.110635
27122	DKK3	0.2224	0.724583	0.0096	0.110635
25778	DSTYK	0.2329	0.744514	0.0096	0.110635
441094	FLJ42709	0.238	0.753742	0.0096	0.110635
2335	FN1	0.2438	0.763888	0.0096	0.110635
3996	LLGL1	0.2267	0.732899	0.0096	0.110635
729020	LOC729020	0.2366	0.751238	0.0096	0.110635
115353	LRRC42	0.2353	0.748893	0.0096	0.110635
4694	NDUFA1	-0.224	-0.672171	0.0096	0.110635
8398	PLA2G6	-0.2288	-0.681629	0.0096	0.110635
54977	SLC25A38	-0.2259	-0.675942	0.0096	0.110635
80117	ARL14	-0.2405	-0.703756	0.0097	0.110635
9570	GOSR2	0.24	0.757283	0.0097	0.110635
285830	LOC285830	-0.2112	-0.645846	0.0097	0.110635
2660	MSTN	-0.2574	-0.733458	0.0097	0.110635
7469	WHSC2	-0.222	-0.668164	0.0097	0.110635
8748	ADAM20	-0.2586	-0.735468	0.0098	0.110635
22914	KLRK1	-0.2154	-0.654663	0.0098	0.110635
5315	PKM2	0.236	0.750158	0.0098	0.110635
6773	STAT2	-0.2298	-0.683572	0.0098	0.110635
162655	ZNF519	-0.2271	-0.678305	0.0098	0.110635
439	ASNA1	0.237	0.751956	0.0099	0.110635
60494	CCDC81	-0.23636	-0.696076	0.0099	0.110635
2004	ELK3	0.23432	0.747113	0.0099	0.110635
2312	FLG	0.2291	0.737447	0.0099	0.110635
10120	ACTR1B	-0.22263	-0.669431	0.01	0.110635
54812	AFTPH	-0.2356	-0.694648	0.01	0.110635
26993	AKAP8L	-0.2359	-0.695212	0.01	0.110635
11016	ATF7	0.2211	0.722026	0.01	0.110635
535	ATP6V0A1	0.2303	0.739696	0.01	0.110635
29760	BLNK	-0.2347	-0.692951	0.01	0.110635
79946	C10orf95	-0.228	-0.680069	0.01	0.110635
123811	C16orf63	0.2256	0.730792	0.01	0.110635
339541	C1orf228	-0.2303	-0.684539	0.01	0.110635
54067	C21orf49	-0.2217	-0.66756	0.01	0.110635
56683	C21orf59	-0.2405	-0.703756	0.01	0.110635
389541	C7orf59	-0.2242	-0.67257	0.01	0.110635
23624	CBLC	-0.2197	-0.663508	0.01	0.110635
149951	COMMD7	-0.21697	-0.657913	0.01	0.110635
1512	CTSH	-0.22574	-0.675626	0.01	0.110635
23191	CYFIP1	0.2228	0.725366	0.01	0.110635
51473	DCDC2	-0.2179	-0.659827	0.01	0.110635
163259	DENND2C	0.2219	0.723602	0.01	0.110635
1808	DPYSL2	0.2278	0.734991	0.01	0.110635
57488	ESYT2	0.2095	0.698325	0.01	0.110635
441518	FAM127C	0.2338	0.746163	0.01	0.110635
644815	FAM83G	0.2339	0.746346	0.01	0.110635
10362	HMG20B	-0.223	-0.670173	0.01	0.110635
55699	IARS2	0.232	0.742855	0.01	0.110635
3796	KIF2A	0.2269	0.73328	0.01	0.110635
3818	KLKB1	-0.24268	-0.707736	0.01	0.110635
100286793	LOC100286793	-0.2177	-0.659416	0.01	0.110635
26018	LRIG1	0.2278	0.734991	0.01	0.110635
51599	LSR	-0.227	-0.678109	0.01	0.110635
8898	MTMR2	0.2237	0.72712	0.01	0.110635
9611	NCOR1	0.234	0.746529	0.01	0.110635
4794	NFKBIE	-0.2234	-0.670973	0.01	0.110635
150159	NHEDC1	-0.2222	-0.668567	0.01	0.110635
24145	PANX1	0.2335	0.745615	0.01	0.110635
118987	PDZD8	0.2304	0.739883	0.01	0.110635
23007	PLCH1	-0.2269	-0.677912	0.01	0.110635
5337	PLD1	0.2304	0.739883	0.01	0.110635
55111	PLEKHJ1	-0.2432	-0.708679	0.01	0.110635
55015	PRPF39	-0.2423	-0.707046	0.01	0.110635
5707	PSMD1	0.2325	0.743778	0.01	0.110635
2185	PTK2B	-0.2325	-0.688768	0.01	0.110635
246243	RNASEH1	0.2217	0.723209	0.01	0.110635
9501	RPH3AL	-0.2314	-0.68666	0.01	0.110635
25950	RWDD3	-0.221	-0.666146	0.01	0.110635
27352	SGSM3	-0.2351	-0.693706	0.01	0.110635
6830	SUPT6H	0.2321	0.74304	0.01	0.110635
7051	TGM1	0.2154	0.710581	0.01	0.110635
81559	TRIM11	-0.2229	-0.669972	0.01	0.110635
81629	TSSK3	-0.2377	-0.69858	0.01	0.110635
10376	TUBA1B	0.2338	0.746163	0.01	0.110635
7297	TYK2	-0.2229	-0.669972	0.01	0.110635
92715	WDR85	-0.23934	-0.701621	0.01	0.110635
16	AARS	0.2344	0.747258	0.011	0.114873
55289	ACOXL	-0.2277	-0.679482	0.011	0.114873
135	ADORA2A	-0.2238	-0.671772	0.011	0.114873
119385	AGAP11	-0.2194	-0.662897	0.011	0.114873
302	ANXA2	0.2281	0.73556	0.011	0.114873
397	ARHGDIB	-0.223	-0.670173	0.011	0.114873
419	ART3	-0.2312	-0.686275	0.011	0.114873
522	ATP5J	-0.23255	-0.688864	0.011	0.114873
587	BCAT2	-0.2177	-0.659416	0.011	0.114873
10904	BLCAP	-0.2124	-0.648383	0.011	0.114873
65998	C11orf95	0.2196	0.719052	0.011	0.114873
339263	C17orf51	0.2343	0.747076	0.011	0.114873
25941	C18orf10	0.2168	0.713428	0.011	0.114873
91689	C22orf32	-0.2231	-0.670373	0.011	0.114873
51337	C8orf55	-0.23145	-0.686756	0.011	0.114873
57082	CASC5	0.242	0.760779	0.011	0.114873
10309	CCNO	-0.218	-0.660033	0.011	0.114873
905	CCNT2	-0.2297	-0.683378	0.011	0.114873
5129	CDK18	-0.23443	-0.69244	0.011	0.114873
1160	CKMT2	0.2169	0.713631	0.011	0.114873
9746	CLSTN3	-0.2192	-0.662489	0.011	0.114873
440081	DDX12	-0.2286	-0.68124	0.011	0.114873
26355	FAM162A	-0.218	-0.660033	0.011	0.114873
402483	FLJ45340	-0.2354	-0.694272	0.011	0.114873
2318	FLNC	0.2283	0.735938	0.011	0.114873
2395	FXN	0.2253	0.730215	0.011	0.114873
11245	GPR176	0.23833	0.75433	0.011	0.114873
80868	HCG4P6	-0.2243	-0.672769	0.011	0.114873
8350	HIST1H3A	-0.244	-0.710124	0.011	0.114873
51170	HSD17B11	-0.213	-0.649646	0.011	0.114873
23553	HYAL4	-0.22923	-0.682466	0.011	0.114873
23463	ICMT	0.2279	0.735181	0.011	0.114873
23096	IQSEC2	-0.2229	-0.669972	0.011	0.114873
2531	KDSR	0.2281	0.73556	0.011	0.114873
4254	KITLG	0.2247	0.729058	0.011	0.114873
51621	KLF13	0.2282	0.735749	0.011	0.114873
100272228	LOC100272228	-0.2278	-0.679677	0.011	0.114873
100289341	LOC100289341	0.2234	0.726536	0.011	0.114873
344595	LOC344595	0.2244	0.728477	0.011	0.114873
399815	LOC399815	-0.2255	-0.675151	0.011	0.114873
5607	MAP2K5	0.2299	0.738948	0.011	0.114873
51360	MBTPS2	0.2398	0.756931	0.011	0.114873
57644	MYH7B	-0.23912	-0.701214	0.011	0.114873
4636	MYL5	-0.2344	-0.692383	0.011	0.114873
93100	NAPRT1	-0.2275	-0.67909	0.011	0.114873
197135	PATL2	-0.2167	-0.657356	0.011	0.114873
115294	PCMTD1	-0.2282	-0.680459	0.011	0.114873
5194	PEX13	-0.2151	-0.654039	0.011	0.114873
54858	PGPEP1	-0.2395	-0.701916	0.011	0.114873
22822	PHLDA1	0.22419	0.728071	0.011	0.114873
728233	PI4KAP1	-0.2317	-0.687236	0.011	0.114873
5307	PITX1	0.2123	0.704194	0.011	0.114873
5325	PLAGL1	0.2318	0.742485	0.011	0.114873
5357	PLS1	-0.2246	-0.673366	0.011	0.114873
28227	PPP2R3B	-0.2186	-0.661262	0.011	0.114873
167681	PRSS35	0.2276	0.734612	0.011	0.114873
84249	PSD2	-0.2163	-0.656529	0.011	0.114873
284119	PTRF	0.228	0.73537	0.011	0.114873
51715	RAB23	0.2149	0.709559	0.011	0.114873
23132	RAD54L2	0.2122	0.703986	0.011	0.114873
5901	RAN	0.2225	0.724779	0.011	0.114873
5933	RBL1	0.2412	0.759386	0.011	0.114873
266747	RGL4	-0.2198	-0.663711	0.011	0.114873
677781	SCARNA16	-0.2447	-0.711384	0.011	0.114873
729238	SFTPA2	-0.2353	-0.694083	0.011	0.114873
79834	SGK269	0.2156	0.71099	0.011	0.114873
10280	SIGMAR1	0.2105	0.700432	0.011	0.114873
9016	SLC25A14	-0.225	-0.67416	0.011	0.114873
8420	SNHG3	-0.24385	-0.709854	0.011	0.114873
54961	SSH3	-0.2307	-0.685312	0.011	0.114873
6749	SSRP1	0.2246	0.728864	0.011	0.114873
29966	STRN3	0.2167	0.713226	0.011	0.114873
29091	STXBP6	0.2228	0.725366	0.011	0.114873
6819	SULT1C2	-0.2251	-0.674359	0.011	0.114873
6925	TCF4	0.2181	0.716051	0.011	0.114873
147798	TMC4	-0.2452	-0.712281	0.011	0.114873
7164	TPD52L1	0.224914	0.729471	0.011	0.114873
10867	TSPAN9	0.2166	0.713023	0.011	0.114873
143630	UBQLNL	-0.2156	-0.655078	0.011	0.114873
54578	UGT1A6	-0.2257	-0.675547	0.011	0.114873
400673	VMAC	-0.2304	-0.684733	0.011	0.114873
10406	WFDC2	-0.21782	-0.659663	0.011	0.114873
374887	YJEFN3	-0.2282	-0.680459	0.011	0.114873
7709	ZBTB17	-0.2326	-0.688959	0.011	0.114873
10793	ZNF273	-0.22035	-0.664829	0.011	0.114873
7581	ZNF33A	-0.2349	-0.693329	0.011	0.114873
126070	ZNF440	-0.2274	-0.678894	0.011	0.114873
54993	ZSCAN2	-0.2124	-0.648383	0.011	0.114873
10349	ABCA10	-0.2141	-0.651952	0.012	0.120552
29777	ABT1	-0.21941	-0.662917	0.012	0.120552
83650	AMAC1L2	-0.24151	-0.705606	0.012	0.120552
55435	AP1AR	-0.2198	-0.663711	0.012	0.120552
9546	APBA3	-0.23749	-0.698188	0.012	0.120552
624	BDKRB2	0.2291	0.737447	0.012	0.120552
150135	C21orf129	-0.242	-0.706499	0.012	0.120552
388743	CAPN8	-0.22385	-0.671872	0.012	0.120552
150472	CBWD2	-0.2082	-0.639442	0.012	0.120552
10920	COPS8	0.2332	0.745065	0.012	0.120552
1329	COX5B	-0.218	-0.660033	0.012	0.120552
1487	CTBP1	-0.2363	-0.695963	0.012	0.120552
55157	DARS2	0.23807	0.753867	0.012	0.120552
8525	DGKZ	-0.2306	-0.685119	0.012	0.120552
1746	DLX2	0.2373	0.752493	0.012	0.120552
165545	DQX1	-0.2199	-0.663915	0.012	0.120552
9451	EIF2AK3	-0.2331	-0.689913	0.012	0.120552
2049	EPHB3	0.2234	0.726536	0.012	0.120552
51104	FAM108B1	-0.2133	-0.650276	0.012	0.120552
150864	FAM117B	-0.2269	-0.677912	0.012	0.120552
116496	FAM129A	0.21222	0.704028	0.012	0.120552
645784	FLJ40330	-0.2213	-0.666753	0.012	0.120552
8729	GBF1	0.2194	0.718653	0.012	0.120552
51573	GDE1	-0.2184	-0.660853	0.012	0.120552
54960	GEMIN8	-0.2238	-0.671772	0.012	0.120552
2671	GFER	-0.2348	-0.69314	0.012	0.120552
64599	GIGYF1	-0.22006	-0.66424	0.012	0.120552
8821	INPP4B	-0.2148	-0.653414	0.012	0.120552
389434	IYD	-0.23625	-0.69587	0.012	0.120552
222658	KCTD20	0.236	0.750158	0.012	0.120552
9897	KIAA0196	0.23458	0.747586	0.012	0.120552
22920	KIFAP3	0.226	0.731559	0.012	0.120552
3965	LGALS9	-0.2093	-0.6418	0.012	0.120552
283663	LOC283663	-0.2208	-0.665741	0.012	0.120552
4128	MAOA	-0.2108	-0.644998	0.012	0.120552
4144	MAT2A	-0.2289	-0.681824	0.012	0.120552
122830	NAA30	0.2143	0.708328	0.012	0.120552
23165	NUP205	0.214	0.707711	0.012	0.120552
5013	OTX1	0.2333	0.745248	0.012	0.120552
165631	PARP15	-0.2182	-0.660443	0.012	0.120552
143	PARP4	-0.2268	-0.677716	0.012	0.120552
5358	PLS3	0.228	0.73537	0.012	0.120552
90673	PPP1R3E	-0.2354	-0.694272	0.012	0.120552
151987	PPP4R2	0.2374	0.752672	0.012	0.120552
8899	PRPF4B	-0.2227	-0.669571	0.012	0.120552
79832	QSER1	0.2207	0.721236	0.012	0.120552
169714	QSOX2	0.21875	0.717355	0.012	0.120552
81890	QTRT1	-0.23164	-0.687121	0.012	0.120552
6156	RPL30	-0.2268	-0.677716	0.012	0.120552
126969	SLC44A3	-0.2174	-0.658799	0.012	0.120552
80736	SLC44A4	-0.2247	-0.673565	0.012	0.120552
6541	SLC7A1	0.227414	0.734259	0.012	0.120552
6786	STIM1	0.2262	0.731943	0.012	0.120552
57620	STIM2	-0.22227	-0.668708	0.012	0.120552
414060	TBC1D3C	-0.2199	-0.663915	0.012	0.120552
130733	TMEM178	-0.2238	-0.671772	0.012	0.120552
81628	TSC22D4	-0.216	-0.655908	0.012	0.120552
51807	TUBA8	-0.2172	-0.658387	0.012	0.120552
54600	UGT1A9	-0.228	-0.680069	0.012	0.120552
57191	VN1R1	-0.2356	-0.694648	0.012	0.120552
197335	WDR90	-0.2294	-0.682796	0.012	0.120552
94039	ZNF101	-0.2184	-0.660853	0.012	0.120552
388795	?	-0.2285	-0.681045	0.013	0.125519
132	ADK	0.2107	0.700852	0.013	0.125519
64577	ALDH8A1	-0.2329	-0.689532	0.013	0.125519
200420	ALMS1P	-0.2252	-0.674557	0.013	0.125519
140564	APOBEC3D	-0.2203	-0.664728	0.013	0.125519
372	ARCN1	0.2226	0.724974	0.013	0.125519
127002	ATXN7L2	-0.21746	-0.658923	0.013	0.125519
55337	C19orf66	-0.2087	-0.640515	0.013	0.125519
54059	C21orf57	-0.2181	-0.660238	0.013	0.125519
128989	C22orf25	-0.2221	-0.668366	0.013	0.125519
79846	C7orf63	-0.2265	-0.677125	0.013	0.125519
440278	CATSPER2P1	0.216	0.711804	0.013	0.125519
90799	CCDC45	-0.2306	-0.685119	0.013	0.125519
915	CD3D	-0.2094	-0.642014	0.013	0.125519
996	CDC27	0.22673	0.732956	0.013	0.125519
55847	CISD1	0.2009	0.6797	0.013	0.125519
10970	CKAP4	0.2136	0.706887	0.013	0.125519
9318	COPS2	0.2226	0.724974	0.013	0.125519
57175	CORO1B	-0.2221	-0.668366	0.013	0.125519
10063	COX17	-0.2262	-0.676534	0.013	0.125519
1469	CST1	-0.214	-0.651743	0.013	0.125519
1520	CTSS	-0.2034	-0.629007	0.013	0.125519
1558	CYP2C8	-0.2325	-0.688768	0.013	0.125519
54876	DCAF16	-0.2208	-0.665741	0.013	0.125519
8444	DYRK3	0.2235	0.726731	0.013	0.125519
374786	EFCAB5	-0.2187	-0.661467	0.013	0.125519
1945	EFNA4	-0.2177	-0.659416	0.013	0.125519
30846	EHD2	0.2184	0.716653	0.013	0.125519
2151	F2RL2	0.2276	0.734612	0.013	0.125519
58489	FAM108C1	-0.2123	-0.648172	0.013	0.125519
127943	FCRLB	-0.2097	-0.642655	0.013	0.125519
79672	FN3KRP	0.2137	0.707093	0.013	0.125519
2697	GJA1	0.2135	0.70668	0.013	0.125519
2819	GPD1	-0.2213	-0.666753	0.013	0.125519
10767	HBS1L	0.2158	0.711397	0.013	0.125519
79618	HMBOX1	0.2176	0.715044	0.013	0.125519
79786	KLHL36	-0.2063	-0.635339	0.013	0.125519
100129534	LOC100129534	-0.2094	-0.642014	0.013	0.125519
100302640	LOC100302640	0.22216	0.724112	0.013	0.125519
646851	LOC646851	-0.2156	-0.655078	0.013	0.125519
79917	MAGIX	-0.2217	-0.66756	0.013	0.125519
4302	MLLT6	-0.21423	-0.652224	0.013	0.125519
11247	NXPH4	0.2205	0.72084	0.013	0.125519
4967	OGDH	0.2053	0.689343	0.013	0.125519
56111	PCDHGA4	0.23	0.739135	0.013	0.125519
5098	PCDHGC3	0.2241	0.727896	0.013	0.125519
10846	PDE10A	-0.2127	-0.649015	0.013	0.125519
344405	PRDXDD1P	-0.2229	-0.669972	0.013	0.125519
5734	PTGER4	-0.2078	-0.638581	0.013	0.125519
54542	RC3H2	0.2278	0.734991	0.013	0.125519
83853	ROPN1L	0.2255	0.730599	0.013	0.125519
6133	RPL9	-0.2162	-0.656322	0.013	0.125519
23223	RRP12	0.233	0.744697	0.013	0.125519
6419	SETMAR	-0.2146	-0.652997	0.013	0.125519
6591	SNAI2	0.2403	0.75781	0.013	0.125519
22938	SNW1	0.197	0.670951	0.013	0.125519
7089	TLE2	-0.2246	-0.673366	0.013	0.125519
79613	TMCO7	0.232	0.742855	0.013	0.125519
255043	TMEM86B	-0.2368	-0.6969	0.013	0.125519
158248	TTC16	-0.2274	-0.678894	0.013	0.125519
7301	TYRO3	0.20722	0.693476	0.013	0.125519
79882	ZC3H14	0.2012	0.680365	0.013	0.125519
80829	ZFP91	0.2349	0.748168	0.013	0.125519
80095	ZNF606	-0.2208	-0.665741	0.013	0.125519
171392	ZNF675	-0.2263	-0.676731	0.013	0.125519
91120	ZNF682	-0.2191	-0.662285	0.013	0.125519
9311	ACCN3	-0.2025	-0.627024	0.014	0.130335
55122	AKIRIN2	0.2323	0.743409	0.014	0.130335
80709	AKNA	-0.21992	-0.663955	0.014	0.130335
348094	ANKDD1A	-0.2112	-0.645846	0.014	0.130335
338692	ANKRD13D	-0.2284	-0.68085	0.014	0.130335
118663	BTBD16	-0.225	-0.67416	0.014	0.130335
91828	C14orf73	-0.2128	-0.649226	0.014	0.130335
90417	C15orf23	0.22942	0.738048	0.014	0.130335
84326	C16orf13	-0.2252	-0.674557	0.014	0.130335
80262	C16orf70	0.21805	0.71595	0.014	0.130335
1108	CHD4	0.2109	0.701272	0.014	0.130335
137075	CLDN23	-0.2189	-0.661876	0.014	0.130335
9787	DLGAP5	0.2185	0.716854	0.014	0.130335
11034	DSTN	0.2175	0.714843	0.014	0.130335
1840	DTX1	0.2151	0.709968	0.014	0.130335
7458	EIF4H	0.2157	0.711193	0.014	0.130335
2069	EREG	0.22066	0.721157	0.014	0.130335
54850	FBXL12	-0.2194	-0.662897	0.014	0.130335
84750	FUT10	0.2014	0.680808	0.014	0.130335
3150	HMGN1	-0.2097	-0.642655	0.014	0.130335
3281	HSBP1	-0.2133	-0.650276	0.014	0.130335
3299	HSF4	-0.2116	-0.646694	0.014	0.130335
10068	IL18BP	-0.2202	-0.664524	0.014	0.130335
56479	KCNQ5	0.2207	0.721236	0.014	0.130335
100188947	LOC100188947	-0.22077	-0.665681	0.014	0.130335
90246	LOC90246	-0.228	-0.680069	0.014	0.130335
64900	LPIN3	-0.2124	-0.648383	0.014	0.130335
1326	MAP3K8	-0.2181	-0.660238	0.014	0.130335
4695	NDUFA2	-0.2259	-0.675942	0.014	0.130335
64332	NFKBIZ	-0.219	-0.66208	0.014	0.130335
55824	PAG1	-0.20732	-0.637546	0.014	0.130335
54852	PAQR5	0.2129	0.705439	0.014	0.130335
267004	PGBD3	0.2007	0.679256	0.014	0.130335
5693	PSMB5	0.2314	0.741744	0.014	0.130335
10744	PTTG2	-0.2108	-0.644998	0.014	0.130335
646024	RAET1K	-0.2035	-0.629226	0.014	0.130335
83998	REG4	-0.2291	-0.682213	0.014	0.130335
50862	RNF141	0.2223	0.724387	0.014	0.130335
388591	RNF207	-0.2145	-0.652788	0.014	0.130335
6304	SATB1	-0.2188	-0.661672	0.014	0.130335
677766	SCARNA2	-0.2244	-0.672968	0.014	0.130335
8796	SCEL	0.22467	0.729	0.014	0.130335
23450	SF3B3	0.219	0.717855	0.014	0.130335
23387	SIK3	0.208	0.695142	0.014	0.130335
123096	SLC25A29	-0.20272	-0.62751	0.014	0.130335
201266	SLC39A11	-0.2039	-0.630104	0.014	0.130335
246329	STAC3	-0.2116	-0.646694	0.014	0.130335
2054	STX2	0.2188	0.717455	0.014	0.130335
11276	SYNRG	-0.2093	-0.6418	0.014	0.130335
7003	TEAD1	0.2053	0.689343	0.014	0.130335
116211	TM4SF19	0.2313	0.741558	0.014	0.130335
124491	TMEM170A	-0.2278	-0.679677	0.014	0.130335
79134	TMEM185B	0.2204	0.720642	0.014	0.130335
199964	TMEM61	0.2153	0.710377	0.014	0.130335
29765	TMOD4	-0.2195	-0.6631	0.014	0.130335
25816	TNFAIP8	-0.2226	-0.669371	0.014	0.130335
9099	USP2	0.2126	0.704817	0.014	0.130335
8673	VAMP8	-0.2278	-0.679677	0.014	0.130335
7417	VDAC2	0.2102	0.699801	0.014	0.130335
56252	YLPM1	0.2056	0.689992	0.014	0.130335
63925	ZNF335	-0.2143	-0.65237	0.014	0.130335
84905	ZNF341	-0.2198	-0.663711	0.014	0.130335
388561	ZNF761	-0.2195	-0.6631	0.014	0.130335
57188	ADAMTSL3	0.2089	0.697055	0.015	0.134303
50808	AK3	-0.1996	-0.620581	0.015	0.134303
55252	ASXL2	0.2278	0.734991	0.015	0.134303
493	ATP2B4	0.2058	0.690424	0.015	0.134303
57198	ATP8B2	0.2118	0.703153	0.015	0.134303
56967	C14orf132	0.2066	0.692146	0.015	0.134303
55776	C6orf64	-0.1961	-0.612692	0.015	0.134303
347475	CCDC160	-0.2365	-0.696338	0.015	0.134303
57530	CGN	-0.2185	-0.661058	0.015	0.134303
79937	CNTNAP3	0.203	0.684332	0.015	0.134303
9696	CROCC	-0.2185	-0.661058	0.015	0.134303
1515	CTSL2	0.226	0.731559	0.015	0.134303
1653	DDX1	0.208	0.695142	0.015	0.134303
8694	DGAT1	-0.2149	-0.653622	0.015	0.134303
1609	DGKQ	-0.2198	-0.663711	0.015	0.134303
1797	DOM3Z	-0.2113	-0.646058	0.015	0.134303
1803	DPP4	0.2216	0.723012	0.015	0.134303
56605	ERO1LB	-0.20777	-0.638516	0.015	0.134303
84140	FAM161A	0.2168	0.713428	0.015	0.134303
157638	FAM84B	-0.2312	-0.686275	0.015	0.134303
55199	FAM86C	0.1959	0.66845	0.015	0.134303
161247	FITM1	-0.213667	-0.651046	0.015	0.134303
2556	GABRA3	0.2303	0.739696	0.015	0.134303
51053	GMNN	-0.19768	-0.616269	0.015	0.134303
3029	HAGH	-0.226	-0.676139	0.015	0.134303
51564	HDAC7	-0.2112	-0.645846	0.015	0.134303
727957	HEATR7A	-0.2216	-0.667358	0.015	0.134303
55662	HIF1AN	0.20848	0.696164	0.015	0.134303
10855	HPSE	0.2233	0.726341	0.015	0.134303
3628	INPP1	-0.2101	-0.643508	0.015	0.134303
79944	L2HGDH	0.2086	0.696419	0.015	0.134303
127841	LOC127841	-0.2101	-0.643508	0.015	0.134303
57497	LRFN2	-0.224	-0.672171	0.015	0.134303
114614	MIR155HG	-0.2073	-0.637503	0.015	0.134303
79258	MMEL1	-0.233	-0.689723	0.015	0.134303
4323	MMP14	0.2051	0.68891	0.015	0.134303
4357	MPST	-0.2087	-0.640515	0.015	0.134303
90634	N4BP2L1	-0.21009	-0.643487	0.015	0.134303
51691	NAA38	-0.2112	-0.645846	0.015	0.134303
89795	NAV3	0.2359	0.749978	0.015	0.134303
79159	NOL12	-0.2181	-0.660238	0.015	0.134303
79156	PLEKHF1	-0.21031	-0.643956	0.015	0.134303
728448	PPIEL	-0.2059	-0.63447	0.015	0.134303
23082	PPRC1	0.2192	0.718254	0.015	0.134303
5817	PVR	0.222	0.723798	0.015	0.134303
5834	PYGB	0.2195	0.718853	0.015	0.134303
154064	RAET1L	0.2255	0.730599	0.015	0.134303
27289	RND1	-0.21204	-0.647624	0.015	0.134303
10692	RRH	-0.2198	-0.663711	0.015	0.134303
374897	SBSN	0.2224	0.724583	0.015	0.134303
23256	SCFD1	0.202	0.682133	0.015	0.134303
6452	SH3BP2	-0.2241	-0.672371	0.015	0.134303
9963	SLC23A1	-0.2208	-0.665741	0.015	0.134303
120103	SLC36A4	0.2154	0.710581	0.015	0.134303
6623	SNCG	-0.2143	-0.65237	0.015	0.134303
6650	SOLH	-0.2196	-0.663304	0.015	0.134303
6778	STAT6	-0.2219	-0.667963	0.015	0.134303
8803	SUCLA2	0.2166	0.713023	0.015	0.134303
374403	TBC1D10C	-0.209	-0.641158	0.015	0.134303
7067	THRA	0.20122	0.680409	0.015	0.134303
55002	TMCO3	0.2213	0.722421	0.015	0.134303
284114	TMEM102	-0.2221	-0.668366	0.015	0.134303
7204	TRIO	0.2138	0.707299	0.015	0.134303
91373	UAP1L1	0.2161	0.712008	0.015	0.134303
80019	UBTD1	0.21822	0.716292	0.015	0.134303
11180	WDR6	-0.2151	-0.654039	0.015	0.134303
58499	ZNF462	0.2015	0.681029	0.015	0.134303
133923	ZNF474	0.2228	0.725366	0.015	0.134303
201514	ZNF584	0.2019	0.681913	0.015	0.134303
390980	ZNF805	-0.2149	-0.653622	0.015	0.134303
79934	ADCK4	-0.2183	-0.660648	0.016	0.138416
137964	AGPAT6	-0.2219	-0.667963	0.016	0.138416
85007	AGXT2L2	-0.2026	-0.627245	0.016	0.138416
51281	ANKMY1	-0.2098	-0.642869	0.016	0.138416
92591	ASB16	-0.2241	-0.672371	0.016	0.138416
400223	C14orf181	-0.1981	-0.617216	0.016	0.138416
79415	C17orf62	-0.2067	-0.636206	0.016	0.138416
79974	C7orf58	0.2071	0.693219	0.016	0.138416
55739	CARKD	-0.2098	-0.642869	0.016	0.138416
151887	CCDC80	0.2162	0.712211	0.016	0.138416
1073	CFL2	0.2104	0.700222	0.016	0.138416
1434	CSE1L	0.2129	0.705439	0.016	0.138416
91966	CXorf40A	-0.2122	-0.647961	0.016	0.138416
63932	CXorf56	0.2223	0.724387	0.016	0.138416
81624	DIAPH3	0.21819	0.716232	0.016	0.138416
9427	ECEL1	-0.2192	-0.662489	0.016	0.138416
1958	EGR1	0.2052	0.689126	0.016	0.138416
54462	FAM190B	0.2154	0.710581	0.016	0.138416
11318	GPR182	-0.214	-0.651743	0.016	0.138416
55890	GPRC5C	-0.2119	-0.647328	0.016	0.138416
727936	GXYLT2	0.21508	0.709927	0.016	0.138416
3038	HAS3	-0.2076	-0.63815	0.016	0.138416
54626	HES2	0.21341	0.706495	0.016	0.138416
121504	HIST4H4	-0.212	-0.647539	0.016	0.138416
7087	ICAM5	0.218	0.71585	0.016	0.138416
3455	IFNAR2	-0.2047	-0.631856	0.016	0.138416
23415	KCNH4	-0.2288	-0.681629	0.016	0.138416
89953	KLC4	-0.2168	-0.657562	0.016	0.138416
9903	KLHL21	0.1943	0.664783	0.016	0.138416
388692	LOC388692	-0.2169	-0.657769	0.016	0.138416
55805	LRP2BP	-0.219	-0.66208	0.016	0.138416
51690	LSM7	-0.2176	-0.659211	0.016	0.138416
4048	LTA4H	0.2127	0.705025	0.016	0.138416
767558	LUZP6	0.22701	0.73349	0.016	0.138416
93380	MMGT1	0.2057	0.690208	0.016	0.138416
4330	MN1	0.2212	0.722224	0.016	0.138416
27158	NDOR1	-0.2004	-0.622367	0.016	0.138416
283131	NEAT1	-0.221	-0.666146	0.016	0.138416
9631	NUP155	0.2155	0.710786	0.016	0.138416
23225	NUP210	-0.2099	-0.643082	0.016	0.138416
79290	OR13A1	-0.2263	-0.676731	0.016	0.138416
5159	PDGFRB	0.2156	0.71099	0.016	0.138416
26147	PHF19	0.2143	0.708328	0.016	0.138416
5440	POLR2K	-0.2081	-0.639227	0.016	0.138416
118471	PRAP1	-0.2189	-0.661876	0.016	0.138416
84440	RAB11FIP4	-0.221	-0.666146	0.016	0.138416
84127	RUNDC2A	0.2154	0.710581	0.016	0.138416
9147	SDCCAG1	0.2277	0.734802	0.016	0.138416
135295	SFRS13B	0.2119	0.703362	0.016	0.138416
54557	SGTB	0.2322	0.743224	0.016	0.138416
10045	SH2D3A	-0.2161	-0.656115	0.016	0.138416
23539	SLC16A8	-0.211	-0.645422	0.016	0.138416
171169	SPACA4	-0.2217	-0.66756	0.016	0.138416
100170229	SRRM5	-0.211	-0.645422	0.016	0.138416
6934	TCF7L2	-0.2004	-0.622367	0.016	0.138416
164656	TMPRSS6	-0.22	-0.664118	0.016	0.138416
7364	UGT2B7	-0.2324	-0.688577	0.016	0.138416
7414	VCL	0.2116	0.702736	0.016	0.138416
114987	WDR31	0.2166	0.713023	0.016	0.138416
7535	ZAP70	-0.2013	-0.624369	0.016	0.138416
56242	ZNF253	-0.2093	-0.6418	0.016	0.138416
163087	ZNF383	-0.2065	-0.635772	0.016	0.138416
284306	ZNF547	-0.2204	-0.66493	0.016	0.138416
100129842	ZNF737	-0.206	-0.634688	0.016	0.138416
203054	ADCK5	-0.2203	-0.664728	0.017	0.142624
550	AUP1	-0.2026	-0.627245	0.017	0.142624
617	BCS1L	-0.2262	-0.676534	0.017	0.142624
440574	C1orf151	-0.2227	-0.669571	0.017	0.142624
100128385	C9orf110	0.22774	0.734878	0.017	0.142624
11092	C9orf9	0.2078	0.694716	0.017	0.142624
202243	CCDC125	-0.2058	-0.634253	0.017	0.142624
728621	CCDC30	-0.211	-0.645422	0.017	0.142624
55536	CDCA7L	0.2105	0.700432	0.017	0.142624
4261	CIITA	-0.2069	-0.636638	0.017	0.142624
63967	CLSPN	0.2135	0.70668	0.017	0.142624
1272	CNTN1	0.219	0.717855	0.017	0.142624
200186	CRTC2	-0.2067	-0.636206	0.017	0.142624
283106	CSNK2A1P	0.21262	0.704859	0.017	0.142624
23002	DAAM1	0.2131	0.705854	0.017	0.142624
1632	DCI	-0.22492	-0.674001	0.017	0.142624
92126	DSEL	0.2035	0.685427	0.017	0.142624
1948	EFNB2	0.2089	0.697055	0.017	0.142624
2023	ENO1	0.2137	0.707093	0.017	0.142624
84498	FAM120B	0.1989	0.675237	0.017	0.142624
80308	FLAD1	-0.1996	-0.620581	0.017	0.142624
2551	GABPA	-0.2098	-0.642869	0.017	0.142624
79695	GALNT12	-0.2023	-0.626583	0.017	0.142624
10052	GJC1	0.2153	0.710377	0.017	0.142624
647042	GOLGA6L10	-0.2189	-0.661876	0.017	0.142624
26996	GPR160	-0.2061	-0.634905	0.017	0.142624
728932	GPR89C	-0.2141	-0.651952	0.017	0.142624
8924	HERC2	0.2113	0.702109	0.017	0.142624
150274	HSCB	-0.2148	-0.653414	0.017	0.142624
345275	HSD17B13	-0.20248	-0.62698	0.017	0.142624
51171	HSD17B14	-0.2079	-0.638796	0.017	0.142624
3398	ID2	-0.2029	-0.627906	0.017	0.142624
3690	ITGB3	0.2153	0.710377	0.017	0.142624
11104	KATNA1	0.20652	0.691974	0.017	0.142624
3846	KRTAP5-9	-0.22724	-0.67858	0.017	0.142624
3915	LAMC1	0.2043	0.687172	0.017	0.142624
8567	MADD	-0.2018	-0.625477	0.017	0.142624
4294	MAP3K10	-0.2195	-0.6631	0.017	0.142624
84693	MCEE	-0.199051	-0.619352	0.017	0.142624
57534	MIB1	0.2207	0.721236	0.017	0.142624
84689	MS4A14	-0.2224	-0.668969	0.017	0.142624
4485	MST1	-0.2075	-0.637934	0.017	0.142624
10471	PFDN6	-0.20893	-0.641008	0.017	0.142624
26030	PLEKHG3	0.2038	0.686082	0.017	0.142624
151242	PPP1R1C	0.2165	0.71282	0.017	0.142624
9588	PRDX6	0.2193	0.718454	0.017	0.142624
8635	RNASET2	-0.21166	-0.646821	0.017	0.142624
55197	RPRD1A	0.2126	0.704817	0.017	0.142624
6281	S100A10	0.2168	0.713428	0.017	0.142624
12	SERPINA3	0.2062	0.691286	0.017	0.142624
55676	SLC30A6	0.2224	0.724583	0.017	0.142624
728661	SLC35E2	-0.2136	-0.650906	0.017	0.142624
7031	TFF1	-0.2205	-0.665133	0.017	0.142624
79725	THAP9	-0.2151	-0.654039	0.017	0.142624
55151	TMEM38B	0.2215	0.722815	0.017	0.142624
59341	TRPV4	-0.2147	-0.653205	0.017	0.142624
57558	USP35	-0.21713	-0.658243	0.017	0.142624
404281	YY2	0.2321	0.74304	0.017	0.142624
58486	ZBED5	-0.2157	-0.655286	0.017	0.142624
98	ACYP2	-0.2102	-0.643721	0.018	0.145573
10093	ARPC4	-0.2126	-0.648805	0.018	0.145573
523	ATP6V1A	0.2298	0.738761	0.018	0.145573
8706	B3GALNT1	-0.19748	-0.615818	0.018	0.145573
27113	BBC3	-0.2163	-0.656529	0.018	0.145573
10974	C10orf116	-0.2032	-0.628567	0.018	0.145573
149840	C20orf196	-0.1967	-0.614054	0.018	0.145573
200844	C3orf67	0.2157	0.711193	0.018	0.145573
81617	CAB39L	-0.2053	-0.633165	0.018	0.145573
100129792	CCDC152	0.21	0.69938	0.018	0.145573
728642	CDK11A	-0.2062	-0.635122	0.018	0.145573
26047	CNTNAP2	0.2092	0.697691	0.018	0.145573
1662	DDX10	0.2155	0.710786	0.018	0.145573
8560	DEGS1	0.2111	0.701691	0.018	0.145573
1877	E4F1	-0.2163	-0.656529	0.018	0.145573
27161	EIF2C2	0.22312	0.72599	0.018	0.145573
2035	EPB41	-0.2067	-0.636206	0.018	0.145573
10827	FAM114A2	0.2155	0.710786	0.018	0.145573
2176	FANCC	0.2223	0.724387	0.018	0.145573
2309	FOXO3	0.2069	0.69279	0.018	0.145573
2624	GATA2	-0.2177	-0.659416	0.018	0.145573
124975	GGT6	-0.2201	-0.664321	0.018	0.145573
2710	GK	-0.18958	-0.597665	0.018	0.145573
2731	GLDC	-0.2085	-0.640086	0.018	0.145573
2738	GLI4	-0.2194	-0.662897	0.018	0.145573
56850	GRIPAP1	-0.2071	-0.637071	0.018	0.145573
30819	KCNIP2	-0.21091	-0.645231	0.018	0.145573
1939	LGTN	0.21513	0.71003	0.018	0.145573
4012	LNPEP	0.2138	0.707299	0.018	0.145573
100188949	LOC100188949	-0.198	-0.61699	0.018	0.145573
168474	LOC168474	-0.2011	-0.623925	0.018	0.145573
84328	LZIC	0.1993	0.676134	0.018	0.145573
51253	MRPL37	0.21801	0.71587	0.018	0.145573
740	MRPL49	0.2046	0.687825	0.018	0.145573
26151	NAT9	-0.2145	-0.652788	0.018	0.145573
79661	NEIL1	-0.2035	-0.629226	0.018	0.145573
79707	NOL9	0.1928	0.661317	0.018	0.145573
80023	NRSN2	0.2044	0.68739	0.018	0.145573
5034	P4HB	0.2149	0.709559	0.018	0.145573
8496	PPFIBP1	0.2028	0.683893	0.018	0.145573
56981	PRDM11	0.2111	0.701691	0.018	0.145573
5630	PRPH	0.2141	0.707917	0.018	0.145573
51334	PRR16	0.2187	0.717254	0.018	0.145573
55037	PTCD3	-0.21032	-0.643977	0.018	0.145573
5894	RAF1	-0.1985	-0.618115	0.018	0.145573
64926	RASAL3	-0.2107	-0.644785	0.018	0.145573
[truncated: 14,386 more rows]

## Sheet: BRCA
Entrez ID	Gene Name	Raw Cox Coefficient	Sigmoidal Normalized Cox Coefficient	Raw Cox P-Value	BH Adjusted P-Value	Model: Surv(times,died) ~ gene + ductal + metaplastic + mucinous + medullary + lobular + sex + age
10039	PARP3	-0.5186	-0.961322	5.4e-07	0.00899046
8764	TNFRSF14	-0.433	-0.927337	4.1e-06	0.0249735
4792	NFKBIA	-0.4514	-0.936486	4.5e-06	0.0249735
25864	ABHD14A	-0.425	-0.922975	1.1e-05	0.0366278
5230	PGK1	0.476	0.952822	1.1e-05	0.0366278
55080	TAPBPL	-0.4089	-0.913423	1.4e-05	0.0388477
255374	MBLAC1	-0.3993	-0.907199	1.7e-05	0.0404333
54859	C3orf75	-0.4101	-0.914173	2.8e-05	0.0438132
140564	APOBEC3D	-0.3964	-0.905237	2.9e-05	0.0438132
79710	MORC4	0.4127	0.923749	3e-05	0.0438132
139322	APOOL	0.4068	0.920291	4e-05	0.0438132
9028	RHBDL1	-0.4072	-0.912351	4.1e-05	0.0438132
79758	DHRS12	-0.3777	-0.891607	4.2e-05	0.0438132
348378	FAM159A	-0.4192	-0.919657	4.3e-05	0.0438132
3660	IRF2	-0.4141	-0.916626	4.4e-05	0.0438132
6618	SNAPC2	-0.3784	-0.892149	4.5e-05	0.0438132
11070	TMEM115	-0.4082	-0.912983	4.5e-05	0.0438132
54059	C21orf57	-0.3902	-0.900909	4.9e-05	0.0438132
11095	ADAMTS8	-0.421	-0.920701	5e-05	0.0438132
5265	SERPINA1	-0.3471	-0.865253	6e-05	0.0456306
5880	RAC2	-0.3592	-0.876319	6.3e-05	0.0456306
8784	TNFRSF18	-0.3784	-0.892149	6.3e-05	0.0456306
100132911	DPH3B	0.3903	0.909806	6.9e-05	0.0456306
347736	TXNDC6	-0.3909	-0.901407	6.9e-05	0.0456306
6448	SGSH	-0.4205	-0.920412	7e-05	0.0456306
441150	C6orf226	-0.3927	-0.902676	7.3e-05	0.0456306
140606	SELM	-0.3612	-0.878064	7.4e-05	0.0456306
23317	DNAJC13	0.3836	0.905184	7.8e-05	0.0463794
7318	UBA7	-0.3851	-0.897209	8.7e-05	0.0488371
93653	ST7OT1	-0.4082	-0.912983	8.8e-05	0.0488371
6892	TAPBP	-0.3695	-0.885063	9.7e-05	0.0520281
53918	PELO	0.3756	0.899369	0.0001	0.0520281
196743	PAOX	-0.353	-0.870759	0.00011	0.0554967
9380	GRHPR	-0.3863	-0.898091	0.00012	0.0563918
79801	SHCBP1	0.3727	0.897179	0.00012	0.0563918
100126791	EGOT	-0.3895	-0.900408	0.00013	0.0563918
7518	XRCC4	0.4037	0.918415	0.00013	0.0563918
157869	C8orf84	-0.3587	-0.875879	0.00014	0.0563918
24142	NAT6	-0.3672	-0.883162	0.00014	0.0563918
440957	LOC440957	-0.3703	-0.885718	0.00015	0.0563918
256281	NUDT14	-0.3629	-0.879529	0.00015	0.0563918
6567	SLC16A2	0.3597	0.886797	0.00015	0.0563918
414328	C9orf103	-0.3657	-0.881907	0.00016	0.0563918
10940	POP1	0.3872	0.907695	0.00016	0.0563918
30	ACAA1	-0.3592	-0.876319	0.00017	0.0563918
113177	C19orf36	-0.3602	-0.877194	0.00017	0.0563918
80212	CCDC92	-0.3547	-0.872306	0.00017	0.0563918
115110	LOC115110	-0.3591	-0.876231	0.00017	0.0563918
51368	TEX264	-0.37	-0.885473	0.00017	0.0563918
116349	C5orf55	-0.3745	-0.889096	0.00018	0.0563918
220729	LOC220729	0.3638	0.890174	0.00018	0.0563918
283948	NHLRC4	-0.3634	-0.879957	0.00018	0.0563918
85495	RPPH1	-0.3353	-0.853584	0.00018	0.0563918
165186	FAM179A	-0.3585	-0.875702	0.0002	0.0563918
4686	NCBP1	0.3482	0.876799	0.0002	0.0563918
10802	SEC24A	0.3379	0.867149	0.0002	0.0563918
196441	ZFC3H1	0.3461	0.874886	0.0002	0.0563918
389541	C7orf59	-0.3609	-0.877804	0.00021	0.0563918
2491	CENPI	0.3601	0.887131	0.00021	0.0563918
54821	ERCC6L	0.3691	0.894398	0.00021	0.0563918
3483	IGFALS	-0.3872	-0.898748	0.00021	0.0563918
6897	TARS	0.3705	0.895488	0.00021	0.0563918
9625	AATK	-0.3778	-0.891684	0.00022	0.0571533
283416	C12orf61	-0.3515	-0.869379	0.00022	0.0571533
50619	DEF6	-0.3453	-0.86353	0.00023	0.0571533
202051	SPATA24	-0.3761	-0.890358	0.00023	0.0571533
79905	TMC7	0.3526	0.880718	0.00023	0.0571533
203328	SUSD3	-0.3418	-0.860122	0.00024	0.0579096
63970	TP53AIP1	-0.3853	-0.897356	0.00024	0.0579096
5333	PLCD1	-0.3675	-0.883412	0.00025	0.0582715
283373	ANKRD52	0.3412	0.870315	0.00026	0.0582715
84688	C9orf24	-0.3418	-0.860122	0.00026	0.0582715
8518	IKBKAP	0.3529	0.880981	0.00026	0.0582715
57609	DIP2B	0.3828	0.904617	0.00027	0.0582715
80045	GPR157	0.3534	0.881418	0.00027	0.0582715
4117	MAK	-0.3608	-0.877717	0.00027	0.0582715
91661	ZNF765	0.3473	0.875982	0.00027	0.0582715
92196	DAPL1	-0.38	-0.893378	0.00028	0.0582715
8742	TNFSF12	-0.3563	-0.873746	0.00028	0.0582715
91664	ZNF845	0.3484	0.87698	0.00028	0.0582715
5720	PSME1	-0.3368	-0.855117	0.00029	0.0588806
134957	STXBP5	0.3651	0.891224	0.00029	0.0588806
93380	MMGT1	0.3364	0.865687	0.00031	0.062183
54552	GNL3L	0.3349	0.864209	0.00032	0.0634248
56113	PCDHGA2	0.3593	0.886462	0.00033	0.0636029
3376	IARS	0.3181	0.846603	0.00034	0.0636029
285643	KIF4B	0.3332	0.862516	0.00034	0.0636029
5255	PHKA1	0.3355	0.864802	0.00034	0.0636029
5699	PSMB10	-0.3237	-0.841211	0.00034	0.0636029
80270	HSD3B7	-0.314	-0.830139	0.00035	0.0637621
57107	PDSS2	0.3448	0.873688	0.00035	0.0637621
56948	SDR39U1	-0.3683	-0.884075	0.00036	0.0637621
27285	TEKT2	-0.3461	-0.864299	0.00036	0.0637621
81856	ZNF611	0.3364	0.865687	0.00036	0.0637621
10538	BATF	-0.3243	-0.841874	0.00037	0.064168
9963	SLC23A1	-0.3497	-0.867706	0.00037	0.064168
55194	FAM176B	-0.3312	-0.849315	0.00038	0.0652229
113763	C7orf29	-0.3139	-0.830021	0.00039	0.065587
202781	LOC202781	-0.3689	-0.88457	0.00039	0.065587
23367	LARP1	0.3153	0.843472	0.0004	0.066596
79643	CHMP6	-0.3555	-0.873028	0.00042	0.066596
25915	NDUFAF3	-0.32314	-0.84059	0.00042	0.066596
85025	TMEM60	-0.3592	-0.876319	0.00042	0.066596
1244	ABCC2	0.34	0.869172	0.00043	0.066596
5284	PIGR	-0.3344	-0.852656	0.00043	0.066596
128853	DUSP15	-0.3493	-0.867331	0.00044	0.066596
51533	PHF7	-0.3512	-0.869102	0.00044	0.066596
196383	RILPL2	-0.3085	-0.823554	0.00044	0.066596
7428	VHL	0.30411	0.830369	0.00044	0.066596
347273	MURC	0.3178	0.84627	0.00045	0.066596
339541	C1orf228	-0.3443	-0.862565	0.00046	0.066596
63932	CXorf56	0.3145	0.842567	0.00046	0.066596
51319	RSRC1	0.355	0.882806	0.00046	0.066596
23142	DCUN1D4	0.34	0.869172	0.00047	0.066596
2954	GSTZ1	-0.3279	-0.845797	0.00047	0.066596
387646	LOC387646	0.3259	0.855023	0.00047	0.066596
4976	OPA1	0.3217	0.850544	0.00048	0.066596
80024	SLC24A6	-0.3317	-0.849842	0.00048	0.066596
29907	SNX15	-0.3056	-0.81999	0.00048	0.066596
51114	ZDHHC9	0.3346	0.863912	0.00048	0.066596
9631	NUP155	0.3337	0.863016	0.00049	0.0674216
53916	RAB4B	-0.3281	-0.846013	0.0005	0.0675612
284040	CDRT4	-0.3474	-0.865538	0.00051	0.0675612
3137	HLA-J	-0.335	-0.853275	0.00051	0.0675612
54811	ZNF562	0.3286	0.857838	0.00051	0.0675612
730112	FAM166B	-0.3357	-0.853994	0.00052	0.0675612
150381	LOC150381	-0.3227	-0.840101	0.00052	0.0675612
284131	FLJ35220	-0.33902	-0.857359	0.00053	0.0675612
3312	HSPA8	0.339	0.868212	0.00054	0.0675612
79142	PHF23	-0.3087	-0.823798	0.00054	0.0675612
100302736	TMED7-TICAM2	0.3468	0.875527	0.00054	0.0675612
79841	AGBL2	-0.3655	-0.881738	0.00055	0.0675612
9728	SECISBP2L	0.3325	0.861814	0.00055	0.0675612
79979	TRMT2B	0.3169	0.845268	0.00055	0.0675612
65989	DLK2	-0.3416	-0.859925	0.00056	0.0675612
9045	RPL14	-0.3312	-0.849315	0.00056	0.0675612
6950	TCP1	0.3586	0.885875	0.00056	0.0675612
10318	TNIP1	-0.3202	-0.837294	0.00056	0.0675612
10767	HBS1L	0.366	0.891946	0.00058	0.069456
254065	BRWD3	0.3245	0.853544	0.0006	0.069456
2771	GNAI2	-0.3212	-0.838422	0.0006	0.069456
3313	HSPA9	0.328	0.857217	0.0006	0.069456
4794	NFKBIE	-0.3152	-0.831546	0.0006	0.069456
8833	GMPS	0.3925	0.911277	0.00061	0.069456
1120	CHKB	-0.3434	-0.86169	0.00062	0.069456
10522	DEAF1	-0.3357	-0.853994	0.00063	0.069456
1741	DLG3	0.3269	0.856072	0.00063	0.069456
339145	FAM92B	-0.3483	-0.86639	0.00063	0.069456
5721	PSME2	-0.3346	-0.852863	0.00063	0.069456
83956	RACGAP1P	0.3441	0.873039	0.00063	0.069456
1678	TIMM8A	0.3203	0.849022	0.00063	0.069456
9575	CLOCK	0.3171	0.845491	0.00064	0.069456
7869	SEMA3B	-0.3453	-0.86353	0.00064	0.069456
4636	MYL5	-0.354	-0.871671	0.00065	0.069456
201562	PTPLB	0.3277	0.856905	0.00066	0.069456
56105	PCDHGA11	0.3284	0.857631	0.00067	0.069456
57758	SCUBE2	-0.3371	-0.855422	0.00067	0.069456
63923	TNN	-0.3578	-0.875083	0.00067	0.069456
11260	XPOT	0.3302	0.859482	0.00067	0.069456
54102	CLIC6	-0.3251	-0.842753	0.00068	0.069456
3385	ICAM3	-0.3086	-0.823676	0.00068	0.069456
165918	RNF168	0.3241	0.853119	0.00068	0.069456
219743	TYSND1	-0.3415	-0.859827	0.00068	0.069456
51447	IP6K2	-0.3304	-0.848469	0.0007	0.0698493
51188	SS18L2	-0.329	-0.846978	0.0007	0.0698493
151903	CCDC12	-0.3324	-0.850576	0.00071	0.0698493
23251	KIAA1024	0.33319	0.862506	0.00072	0.0698493
5192	PEX10	-0.3209	-0.838084	0.00072	0.0698493
83882	TSPAN10	-0.2895	-0.799001	0.00072	0.0698493
1062	CENPE	0.3159	0.844148	0.00073	0.0698493
5364	PLXNB1	-0.3564	-0.873836	0.00073	0.0698493
55771	PRR11	0.3234	0.852372	0.00073	0.0698493
51035	UBXN1	-0.3142	-0.830374	0.00073	0.0698493
167127	UGT3A2	-0.3481	-0.866201	0.00073	0.0698493
348995	NUP43	0.3342	0.863514	0.00074	0.0704015
5431	POLR2B	0.3255	0.854602	0.00075	0.0704381
6545	SLC7A4	-0.3388	-0.857139	0.00075	0.0704381
154791	C7orf55	-0.3266	-0.844391	0.00076	0.0704381
51112	TTC15	-0.3185	-0.83536	0.00076	0.0704381
550631	CCDC157	-0.3278	-0.845689	0.00077	0.0704381
50651	SLC45A1	-0.346	-0.864203	0.00077	0.0704381
84671	ZNF347	0.323	0.851944	0.00077	0.0704381
7576	ZNF28	0.3275	0.856697	0.00078	0.070963
133619	PRRC1	0.3325	0.861814	0.00079	0.0712257
27077	B9D1	-0.3135	-0.82955	0.0008	0.0712257
79940	C6orf155	-0.3215	-0.838759	0.0008	0.0712257
199745	THAP8	-0.32505	-0.842699	0.0008	0.0712257
1593	CYP27A1	-0.3196	-0.836614	0.00081	0.0713529
153339	TMEM167A	0.323	0.851944	0.00081	0.0713529
57082	CASC5	0.3213	0.85011	0.00082	0.0714774
4778	NFE2	-0.3004	-0.813436	0.00082	0.0714774
57720	GPR107	0.3176	0.846048	0.00083	0.0715993
246269	LACE1	0.324	0.853012	0.00083	0.0715993
2999	GZMH	-0.3112	-0.826815	0.00084	0.0717188
389434	IYD	0.3346	0.863912	0.00084	0.0717188
84892	C3orf39	-0.3227	-0.840101	0.00085	0.0719505
149473	CCDC24	-0.3389	-0.857239	0.00086	0.0719505
5777	PTPN6	-0.314	-0.830139	0.00086	0.0719505
6176	RPLP1	-0.3098	-0.825131	0.00086	0.0719505
83547	RILP	-0.2909	-0.800909	0.00088	0.072387
9814	SFI1	-0.3486	-0.866673	0.00088	0.072387
51364	ZMYND10	-0.3274	-0.845258	0.00088	0.072387
205564	SENP5	0.3108	0.838318	0.00089	0.072387
23564	DDAH2	-0.3075	-0.822332	0.0009	0.072387
132203	SNTN	-0.3554	-0.872938	0.0009	0.072387
51230	PHF20	0.33	0.859277	0.00091	0.072387
10311	DSCR3	0.2909	0.813625	0.00094	0.072387
2028	ENPEP	0.3084	0.835506	0.00094	0.072387
200933	FBXO45	0.3226	0.851514	0.00094	0.072387
81555	YIPF5	0.3172	0.845603	0.00094	0.072387
646450	C3orf71	-0.318	-0.834787	0.00096	0.072387
440465	FLJ90757	-0.3314	-0.849526	0.00096	0.072387
51635	DHRS7	-0.3282	-0.84612	0.00097	0.072387
29997	GLTSCR2	-0.313	-0.828959	0.00097	0.072387
64924	SLC30A5	0.312	0.839707	0.00097	0.072387
51222	ZNF219	-0.3175	-0.834213	0.00097	0.072387
51279	C1RL	-0.3407	-0.859035	0.00098	0.072387
79071	ELOVL6	0.3318	0.861108	0.00099	0.072387
2067	ERCC1	-0.3158	-0.832245	0.00099	0.072387
9961	MVP	-0.3035	-0.817369	0.00099	0.072387
29801	ZDHHC8	-0.3319	-0.850052	0.00099	0.072387
57596	BEGAIN	-0.3436	-0.861885	0.001	0.072387
127254	C1orf173	-0.3242	-0.841763	0.001	0.072387
629	CFB	-0.311	-0.826575	0.001	0.072387
100130148	LOC100130148	-0.3544	-0.872034	0.001	0.072387
79873	NUDT18	-0.3297	-0.847725	0.001	0.072387
25930	PTPN23	-0.3237	-0.841211	0.001	0.072387
29127	RACGAP1	0.3184	0.846935	0.001	0.072387
83853	ROPN1L	-0.3214	-0.838647	0.001	0.072387
23322	RPGRIP1L	0.293	0.816383	0.001	0.072387
90135	BTBD6	-0.302	-0.815475	0.0011	0.0744467
145376	C14orf50	-0.3113	-0.826935	0.0011	0.0744467
1052	CEBPD	-0.3321	-0.850262	0.0011	0.0744467
29082	CHMP4A	-0.3292	-0.847192	0.0011	0.0744467
112398	EGLN2	-0.296	-0.807725	0.0011	0.0744467
55763	EXOC1	0.2968	0.821279	0.0011	0.0744467
3004	GZMM	-0.3136	-0.829668	0.0011	0.0744467
3320	HSP90AA1	0.322	0.850868	0.0011	0.0744467
729082	LOC729082	0.3073	0.834203	0.0011	0.0744467
10797	MTHFD2	0.3311	0.860398	0.0011	0.0744467
56102	PCDHGB3	0.3207	0.849458	0.0011	0.0744467
5110	PCMT1	0.31	0.837385	0.0011	0.0744467
5565	PRKAB2	0.3045	0.830842	0.0011	0.0744467
51308	REEP2	-0.321	-0.838197	0.0011	0.0744467
26206	SPAG8	-0.3118	-0.827532	0.0011	0.0744467
388558	ZNF808	0.3088	0.835978	0.0011	0.0744467
90288	?	-0.3127	-0.828603	0.0012	0.0751083
255239	ANKK1	-0.3177	-0.834443	0.0012	0.0751083
55156	ARMC1	0.3108	0.838318	0.0012	0.0751083
157922	CAMSAP1	0.3122	0.839938	0.0012	0.0751083
84317	CCDC115	-0.3042	-0.818246	0.0012	0.0751083
100133941	CD24	0.3113	0.838898	0.0012	0.0751083
80205	CHD9	0.308	0.835033	0.0012	0.0751083
1211	CLTA	-0.3225	-0.839878	0.0012	0.0751083
1665	DHX15	0.2829	0.802777	0.0012	0.0751083
2108	ETFA	0.3174	0.845825	0.0012	0.0751083
161247	FITM1	-0.3213	-0.838534	0.0012	0.0751083
3705	ITPK1	-0.319	-0.835931	0.0012	0.0751083
3799	KIF5B	0.3128	0.840627	0.0012	0.0751083
138639	PTPDC1	0.292	0.815074	0.0012	0.0751083
6441	SFTPD	-0.3237	-0.841211	0.0012	0.0751083
8651	SOCS1	-0.312	-0.827771	0.0012	0.0751083
7319	UBE2A	0.3152	0.843359	0.0012	0.0751083
254887	ZDHHC23	0.299	0.82406	0.0012	0.0751083
151126	ZNF385B	-0.30901	-0.824174	0.0012	0.0751083
84124	ZNF394	-0.3141	-0.830257	0.0012	0.0751083
115201	ATG4A	0.3143	0.84234	0.0013	0.0759428
1188	CLCNKB	-0.3453	-0.86353	0.0013	0.0759428
1374	CPT1A	0.3067	0.833488	0.0013	0.0759428
60401	EDA2R	0.3098	0.837152	0.0013	0.0759428
26270	FBXO6	-0.2924	-0.802936	0.0013	0.0759428
2322	FLT3	-0.3225	-0.839878	0.0013	0.0759428
373156	GSTK1	-0.304	-0.817996	0.0013	0.0759428
3489	IGFBP6	-0.3073	-0.822087	0.0013	0.0759428
133746	JMY	0.295	0.818975	0.0013	0.0759428
100188949	LOC100188949	-0.3059	-0.820362	0.0013	0.0759428
653113	LOC653113	-0.3073	-0.822087	0.0013	0.0759428
126308	MOBKL2A	-0.2922	-0.802667	0.0013	0.0759428
83876	MRO	0.2913	0.814153	0.0013	0.0759428
57786	RBAK	0.306	0.83265	0.0013	0.0759428
55153	SDAD1	0.3052	0.831688	0.0013	0.0759428
376497	SLC27A1	-0.3098	-0.825131	0.0013	0.0759428
6770	STAR	-0.291	-0.801045	0.0013	0.0759428
26043	UBXN7	0.2973	0.821915	0.0013	0.0759428
8233	ZRSR2	-0.3146	-0.830844	0.0013	0.0759428
22848	AAK1	0.316	0.84426	0.0014	0.0779552
92340	C17orf72	-0.2984	-0.810859	0.0014	0.0779552
84852	C1orf203	-0.2858	-0.79388	0.0014	0.0779552
84221	C21orf56	-0.3185	-0.83536	0.0014	0.0779552
1616	DAXX	-0.2937	-0.804677	0.0014	0.0779552
89846	FGD3	-0.2919	-0.802262	0.0014	0.0779552
3306	HSPA2	-0.2849	-0.792617	0.0014	0.0779552
3796	KIF2A	0.2724	0.787688	0.0014	0.0779552
5479	PPIB	-0.3022	-0.815729	0.0014	0.0779552
10728	PTGES3	0.318	0.846492	0.0014	0.0779552
6209	RPS15	-0.3111	-0.826695	0.0014	0.0779552
23098	SARM1	-0.3077	-0.822577	0.0014	0.0779552
11231	SEC63	0.3141	0.842112	0.0014	0.0779552
8676	STX11	-0.2961	-0.807856	0.0014	0.0779552
219621	C10orf107	-0.305	-0.819245	0.0015	0.0810828
8445	DYRK2	0.3117	0.839361	0.0015	0.0810828
51257	2015-03-02	-0.2907	-0.800638	0.0015	0.0810828
8974	P4HA2	0.3104	0.837852	0.0015	0.0810828
5130	PCYT1A	0.2991	0.824186	0.0015	0.0810828
441531	PGAM4	0.317	0.84538	0.0015	0.0810828
51808	PHAX	0.2888	0.81083	0.0015	0.0810828
5971	RELB	-0.2857	-0.79374	0.0015	0.0810828
7980	TFPI2	-0.3186	-0.835474	0.0015	0.0810828
22	ABCB7	0.2863	0.807455	0.0016	0.0824718
91452	ACBD5	0.2962	0.820514	0.0016	0.0824718
54906	C10orf18	0.3111	0.838666	0.0016	0.0824718
125988	C19orf70	-0.3004	-0.813436	0.0016	0.0824718
1056	CEL	0.3081	0.835151	0.0016	0.0824718
2197	FAU	-0.288	-0.796939	0.0016	0.0824718
2617	GARS	0.3009	0.82643	0.0016	0.0824718
55142	HAUS2	0.2994	0.824562	0.0016	0.0824718
3052	HCCS	0.3317	0.861007	0.0016	0.0824718
3487	IGFBP4	-0.2945	-0.805742	0.0016	0.0824718
113691	MGC16703	-0.332	-0.850157	0.0016	0.0824718
4952	OCRL	0.3082	0.83527	0.0016	0.0824718
340562	SATL1	0.3108	0.838318	0.0016	0.0824718
6836	SURF4	0.30642	0.833153	0.0016	0.0824718
7514	XPO1	0.3001	0.825436	0.0016	0.0824718
10865	ARID5A	-0.288	-0.796939	0.0017	0.0837376
79058	ASPSCR1	-0.3002	-0.81318	0.0017	0.0837376
256329	C11orf35	-0.3205	-0.837633	0.0017	0.0837376
122616	C14orf79	-0.3085	-0.823554	0.0017	0.0837376
9940	DLEC1	-0.3144	-0.830609	0.0017	0.0837376
23379	KIAA0947	0.3	0.825311	0.0017	0.0837376
400569	MED11	-0.3057	-0.820114	0.0017	0.0837376
5290	PIK3CA	0.3113	0.838898	0.0017	0.0837376
151742	PPM1L	0.2874	0.808947	0.0017	0.0837376
5592	PRKG1	0.2842	0.804577	0.0017	0.0837376
55285	RBM41	0.2829	0.802777	0.0017	0.0837376
6159	RPL29	-0.2864	-0.794718	0.0017	0.0837376
6122	RPL3	-0.2804	-0.786198	0.0017	0.0837376
54997	TESC	-0.3308	-0.848893	0.0017	0.0837376
286451	YIPF6	0.2939	0.817553	0.0017	0.0837376
51024	FIS1	-0.3157	-0.832129	0.0018	0.0851369
51305	KCNK9	0.2986	0.823557	0.0018	0.0851369
55605	KIF21A	0.3	0.825311	0.0018	0.0851369
84930	MASTL	0.2806	0.799556	0.0018	0.0851369
4149	MAX	-0.3052	-0.819493	0.0018	0.0851369
147407	MCART2	0.2801	0.798849	0.0018	0.0851369
51068	NMD3	0.297	0.821534	0.0018	0.0851369
158046	NXNL2	-0.317	-0.833636	0.0018	0.0851369
10606	PAICS	0.3242	0.853225	0.0018	0.0851369
9462	RASAL2	0.2962	0.820514	0.0018	0.0851369
10592	SMC2	0.2929	0.816252	0.0018	0.0851369
53340	SPA17	-0.2861	-0.794299	0.0018	0.0851369
9552	SPAG7	-0.2935	-0.80441	0.0018	0.0851369
79178	THTPA	-0.2944	-0.805609	0.0018	0.0851369
7832	BTG2	-0.3255	-0.843192	0.0019	0.0869041
55702	CCDC94	-0.2879	-0.7968	0.0019	0.0869041
904	CCNT1	0.3016	0.827296	0.0019	0.0869041
81888	HYI	-0.2762	-0.78005	0.0019	0.0869041
79836	LONRF3	0.2924	0.815599	0.0019	0.0869041
84918	LRP11	0.308	0.835033	0.0019	0.0869041
51633	OTUD6B	0.2823	0.801941	0.0019	0.0869041
92960	PEX11G	-0.3036	-0.817494	0.0019	0.0869041
5790	PTPRCAP	-0.291	-0.801045	0.0019	0.0869041
6478	SIAH2	-0.292	-0.802397	0.0019	0.0869041
9868	TOMM70A	0.291	0.813757	0.0019	0.0869041
9819	TSC22D2	0.3093	0.836566	0.0019	0.0869041
51703	ACSL5	-0.2777	-0.782264	0.002	0.0876263
221491	C6orf1	-0.2925	-0.80307	0.002	0.0876263
26256	CABYR	-0.296	-0.807725	0.002	0.0876263
79140	CCDC28B	-0.2773	-0.781675	0.002	0.0876263
1043	CD52	-0.2924	-0.802936	0.002	0.0876263
51466	EVL	-0.3028	-0.816487	0.002	0.0876263
2962	GTF2F1	-0.2885	-0.797628	0.002	0.0876263
26231	LRRC29	-0.2984	-0.810859	0.002	0.0876263
150365	MEI1	-0.3112	-0.826815	0.002	0.0876263
56180	MOSPD1	0.3135	0.841429	0.002	0.0876263
4350	MPG	-0.288	-0.796939	0.002	0.0876263
54948	MRPL16	-0.2963	-0.808119	0.002	0.0876263
126006	PCP2	-0.309	-0.824162	0.002	0.0876263
54103	PION	-0.3016	-0.814968	0.002	0.0876263
29108	PYCARD	-0.291	-0.801045	0.002	0.0876263
26228	STAP1	-0.2947	-0.806008	0.002	0.0876263
55337	C19orf66	-0.2876	-0.796385	0.0021	0.0885137
1024	CDK8	0.3054	0.831929	0.0021	0.0885137
1153	CIRBP	-0.3091	-0.824284	0.0021	0.0885137
84277	DNAJC30	-0.2894	-0.798864	0.0021	0.0885137
6596	HLTF	0.2766	0.793842	0.0021	0.0885137
3957	LGALS2	-0.2987	-0.811248	0.0021	0.0885137
254050	LRRC43	-0.2846	-0.792194	0.0021	0.0885137
80741	LY6G5C	-0.2904	-0.80023	0.0021	0.0885137
10588	MTHFS	-0.2796	-0.785039	0.0021	0.0885137
80155	NAA15	0.3085	0.835624	0.0021	0.0885137
4719	NDUFS1	0.2796	0.798141	0.0021	0.0885137
6015	RING1	-0.303	-0.81674	0.0021	0.0885137
200312	RNF215	-0.2982	-0.8106	0.0021	0.0885137
55681	SCYL2	0.294	0.817683	0.0021	0.0885137
9217	VAPB	0.3059	0.83253	0.0021	0.0885137
54443	ANLN	0.2982	0.823054	0.0022	0.0908878
57673	BEND3	0.2975	0.822168	0.0022	0.0908878
3512	IGJ	-0.3112	-0.826815	0.0022	0.0908878
10873	ME3	-0.3136	-0.829668	0.0022	0.0908878
5696	PSMB8	-0.2856	-0.7936	0.0022	0.0908878
54542	RC3H2	0.2854	0.806226	0.0022	0.0908878
374403	TBC1D10C	-0.2877	-0.796524	0.0022	0.0908878
140467	ZNF358	-0.2758	-0.779457	0.0022	0.0908878
26057	ANKRD17	0.2797	0.798283	0.0023	0.0924944
701	BUB1B	0.301	0.826554	0.0023	0.0924944
54165	DCUN1D1	0.2988	0.823809	0.0023	0.0924944
27252	KLHL20	0.2866	0.807863	0.0023	0.0924944
6150	MRPL23	-0.2911	-0.801181	0.0023	0.0924944
157310	PEBP4	-0.3079	-0.822822	0.0023	0.0924944
5980	REV3L	0.2846	0.805128	0.0023	0.0924944
202500	TCTE1	-0.30826	-0.823262	0.0023	0.0924944
80764	THAP7	-0.3022	-0.815729	0.0023	0.0924944
91544	UBXN11	-0.3084	-0.823432	0.0023	0.0924944
284346	ZNF575	-0.2905	-0.800366	0.0023	0.0924944
200316	APOBEC3F	-0.273	-0.775263	0.0024	0.0942396
973	CD79A	-0.2809	-0.78692	0.0024	0.0942396
780776	FAM18A	-0.3012	-0.814458	0.0024	0.0942396
144501	KRT80	0.2971	0.821661	0.0024	0.0942396
606724	LOC606724	-0.2982	-0.8106	0.0024	0.0942396
4714	NDUFB8	-0.2705	-0.77146	0.0024	0.0942396
26469	PTPN18	-0.3102	-0.825614	0.0024	0.0942396
8467	SMARCA5	0.2914	0.814285	0.0024	0.0942396
389058	SP5	-0.31	-0.825373	0.0024	0.0942396
158248	TTC16	-0.31	-0.825373	0.0024	0.0942396
54784	ALKBH4	-0.2864	-0.794718	0.0025	0.0959044
55729	ATF7IP	0.2956	0.819746	0.0025	0.0959044
57827	C6orf47	-0.2817	-0.78807	0.0025	0.0959044
5046	PCSK6	-0.2829	-0.789785	0.0025	0.0959044
5986	RFNG	-0.2896	-0.799138	0.0025	0.0959044
158787	RIBC1	-0.2857	-0.79374	0.0025	0.0959044
6222	RPS18	-0.2857	-0.79374	0.0025	0.0959044
64854	USP46	0.289	0.811098	0.0025	0.0959044
340706	VWA2	-0.2946	-0.805875	0.0025	0.0959044
285971	ZNF775	-0.3107	-0.826215	0.0025	0.0959044
338440	ANO9	-0.28475	-0.792405	0.0026	0.0966237
55832	CAND1	0.277	0.79442	0.0026	0.0966237
440193	CCDC88C	-0.3162	-0.83271	0.0026	0.0966237
26130	GAPVD1	0.2919	0.814943	0.0026	0.0966237
63905	MANBAL	-0.2698	-0.770385	0.0026	0.0966237
4201	MEA1	-0.2865	-0.794857	0.0026	0.0966237
56109	PCDHGA6	0.3005	0.825934	0.0026	0.0966237
5887	RAD23B	0.299	0.82406	0.0026	0.0966237
25788	RAD54B	0.2998	0.825062	0.0026	0.0966237
54439	RBM27	0.2908	0.813493	0.0026	0.0966237
203562	TMEM31	0.283	0.802916	0.0026	0.0966237
27340	UTP20	0.269	0.782588	0.0026	0.0966237
79446	WDR25	-0.2923	-0.802801	0.0026	0.0966237
25888	ZNF473	0.296	0.820258	0.0026	0.0966237
641371	ACOT1	-0.2605	-0.755682	0.0027	0.0966716
137872	ADHFE1	-0.2907	-0.800638	0.0027	0.0966716
10488	CREB3	-0.2962	-0.807988	0.0027	0.0966716
1431	CS	0.2862	0.807318	0.0027	0.0966716
11068	CYB561D2	-0.2979	-0.81021	0.0027	0.0966716
23291	FBXW11	0.266	0.777999	0.0027	0.0966716
2735	GLI1	-0.3114	-0.827054	0.0027	0.0966716
3066	HDAC2	0.3033	0.829383	0.0027	0.0966716
9840	KIAA0748	-0.2848	-0.792476	0.0027	0.0966716
55669	MFN1	0.2822	0.801802	0.0027	0.0966716
55074	OXR1	0.2622	0.772065	0.0027	0.0966716
5204	PFDN5	-0.2795	-0.784894	0.0027	0.0966716
5422	POLA1	0.2869	0.80827	0.0027	0.0966716
5433	POLR2D	0.3028	0.828771	0.0027	0.0966716
79723	SUV39H2	0.2911	0.813889	0.0027	0.0966716
155382	VPS37D	-0.293	-0.803741	0.0027	0.0966716
49854	ZNF295	0.2838	0.804025	0.0027	0.0966716
80162	ATHL1	-0.2978	-0.81008	0.0028	0.0967162
8705	B3GALT4	-0.2831	-0.79007	0.0028	0.0967162
29903	CCDC106	-0.2965	-0.808382	0.0028	0.0967162
972	CD74	-0.279	-0.784166	0.0028	0.0967162
63967	CLSPN	0.2966	0.821025	0.0028	0.0967162
1469	CST1	-0.2995	-0.812281	0.0028	0.0967162
1471	CST3	-0.284	-0.791347	0.0028	0.0967162
94234	FOXQ1	-0.2981	-0.81047	0.0028	0.0967162
29933	GPR132	-0.2849	-0.792617	0.0028	0.0967162
2948	GSTM4	-0.2891	-0.798453	0.0028	0.0967162
9567	GTPBP1	-0.2628	-0.759392	0.0028	0.0967162
89932	PAPLN	-0.29	-0.799684	0.0028	0.0967162
26025	PCDHGA12	0.2825	0.80222	0.0028	0.0967162
29098	RANGRF	-0.2861	-0.794299	0.0028	0.0967162
23541	SEC14L2	-0.2803	-0.786054	0.0028	0.0967162
146542	ZNF688	-0.2908	-0.800774	0.0028	0.0967162
221584	ZSCAN12P1	0.2762	0.793263	0.0028	0.0967162
51529	ANAPC11	-0.2791	-0.784312	0.0029	0.0971471
324	APC	0.2927	0.815991	0.0029	0.0971471
124872	B4GALNT2	0.3053	0.831808	0.0029	0.0971471
573	BAG1	-0.3087	-0.823798	0.0029	0.0971471
124944	C17orf49	-0.2918	-0.802127	0.0029	0.0971471
24137	KIF4A	0.2921	0.815205	0.0029	0.0971471
116844	LRG1	-0.2791	-0.784312	0.0029	0.0971471
7867	MAPKAPK3	-0.287	-0.795553	0.0029	0.0971471
92140	MTDH	0.2809	0.799979	0.0029	0.0971471
55644	OSGEP	-0.2719	-0.773596	0.0029	0.0971471
51177	PLEKHO1	-0.275	-0.778266	0.0029	0.0971471
440503	PLIN5	-0.2977	-0.80995	0.0029	0.0971471
677766	SCARNA2	-0.2706	-0.771613	0.0029	0.0971471
83860	TAF3	0.2729	0.788429	0.0029	0.0971471
80263	TRIM45	-0.289	-0.798316	0.0029	0.0971471
9774	BCLAF1	0.2819	0.801382	0.003	0.0992982
55010	C12orf48	0.2687	0.782133	0.003	0.0992982
9175	MAP3K13	0.2863	0.807455	0.003	0.0992982
51537	MTP18	-0.272	-0.773748	0.003	0.0992982
89970	RSPRY1	0.2669	0.779385	0.003	0.0992982
9278	ZBTB22	-0.2942	-0.805343	0.003	0.0992982
91409	CCDC74B	-0.28157	-0.787884	0.0031	0.100217
54788	DNAJB12	-0.3012	-0.814458	0.0031	0.100217
129080	EMID1	-0.2814	-0.787639	0.0031	0.100217
345630	FBLL1	-0.2982	-0.8106	0.0031	0.100217
79792	GSDMD	-0.283	-0.789928	0.0031	0.100217
284004	HEXDC	-0.2858	-0.79388	0.0031	0.100217
9466	IL27RA	-0.2709	-0.772072	0.0031	0.100217
84295	PHF6	0.2907	0.813361	0.0031	0.100217
55209	SETD5	0.2748	0.791224	0.0031	0.100217
79064	TMEM223	-0.262	-0.758107	0.0031	0.100217
10277	UBE4B	0.3106	0.838085	0.0031	0.100217
63929	XPNPEP3	0.2827	0.802499	0.0031	0.100217
100131814	C6orf217	-0.2981	-0.81047	0.0032	0.101094
54344	DPM3	-0.2732	-0.775565	0.0032	0.101094
51182	HSPA14	0.2721	0.787242	0.0032	0.101094
5608	MAP2K6	-0.2767	-0.78079	0.0032	0.101094
57591	MKL1	-0.2627	-0.759231	0.0032	0.101094
116541	MRPL54	-0.2673	-0.76651	0.0032	0.101094
50855	PARD6A	-0.285	-0.792757	0.0032	0.101094
6604	SMARCD3	-0.2944	-0.805609	0.0032	0.101094
26872	STEAP1	-0.2883	-0.797353	0.0032	0.101094
200424	TET3	0.285	0.805678	0.0032	0.101094
26019	UPF2	0.2701	0.78425	0.0032	0.101094
126374	WTIP	-0.2948	-0.80614	0.0032	0.101094
79575	ABHD8	-0.285	-0.792757	0.0033	0.102695
222256	CDHR3	-0.2861	-0.794299	0.0033	0.102695
9675	KIAA0406	0.2822	0.801802	0.0033	0.102695
124602	KIF19	-0.2862	-0.794439	0.0033	0.102695
100128292	LOC100128292	-0.2936	-0.804544	0.0033	0.102695
4485	MST1	-0.2964	-0.80825	0.0033	0.102695
6157	RPL27A	-0.2714	-0.772835	0.0033	0.102695
6203	RPS9	-0.2631	-0.759872	0.0033	0.102695
842	CASP9	-0.263	-0.759712	0.0034	0.104248
2323	FLT3LG	-0.2746	-0.777668	0.0034	0.104248
4357	MPST	-0.2785	-0.783436	0.0034	0.104248
23637	RABGAP1	0.2667	0.779078	0.0034	0.104248
55773	TBC1D23	0.2836	0.803748	0.0034	0.104248
7178	TPT1	-0.2678	-0.767289	0.0034	0.104248
6737	TRIM21	-0.2813	-0.787496	0.0034	0.104248
27037	TRMT2A	-0.292	-0.802397	0.0034	0.104248
8754	ADAM9	0.2685	0.781829	0.0035	0.104994
91647	ATPAF2	-0.2893	-0.798727	0.0035	0.104994
401124	DTHD1	-0.2984	-0.810859	0.0035	0.104994
81558	FAM117A	-0.2801	-0.785764	0.0035	0.104994
649446	FLJ35776	-0.2812	-0.787352	0.0035	0.104994
4707	NDUFB1	-0.287	-0.795553	0.0035	0.104994
440836	ODF3B	-0.2753	-0.778713	0.0035	0.104994
118672	PSTK	-0.2772	-0.781528	0.0035	0.104994
5810	RAD1	0.2729	0.788429	0.0035	0.104994
6288	SAA1	-0.2905	-0.800366	0.0035	0.104994
138474	TAF1L	0.2627	0.772854	0.0035	0.104994
10730	YME1L1	0.2675	0.780304	0.0035	0.104994
199731	CADM4	-0.2614	-0.757139	0.0036	0.106459
1660	DHX9	0.2764	0.793553	0.0036	0.106459
55929	DMAP1	-0.2759	-0.779605	0.0036	0.106459
2286	FKBP2	-0.2621	-0.758268	0.0036	0.106459
643314	KIAA0754	0.2736	0.789463	0.0036	0.106459
80774	LIMD2	-0.265	-0.762895	0.0036	0.106459
55037	PTCD3	0.292	0.815074	0.0036	0.106459
51132	RLIM	0.2825	0.80222	0.0036	0.106459
36	ACADSB	-0.2926	-0.803205	0.0037	0.108072
6363	CCL19	-0.2726	-0.774658	0.0037	0.108072
9329	GTF3C4	0.2797	0.798283	0.0037	0.108072
23438	HARS2	0.2844	0.804853	0.0037	0.108072
3141	HLCS	0.2749	0.79137	0.0037	0.108072
79644	SRD5A3	0.287	0.808405	0.0037	0.108072
261729	STEAP2	-0.2759	-0.779605	0.0037	0.108072
79656	BEND5	-0.2671	-0.766197	0.0038	0.108705
91300	C19orf22	-0.2645	-0.762102	0.0038	0.108705
64925	CCDC71	-0.28	-0.785619	0.0038	0.108705
79174	CRELD2	-0.26	-0.754869	0.0038	0.108705
8666	EIF3G	-0.274	-0.776769	0.0038	0.108705
92689	FAM114A1	0.2802	0.798991	0.0038	0.108705
3820	KLRB1	-0.281	-0.787064	0.0038	0.108705
10641	NPRL2	-0.2818	-0.788214	0.0038	0.108705
5593	PRKG2	0.279	0.797287	0.0038	0.108705
5933	RBL1	0.2875	0.809082	0.0038	0.108705
51522	TMEM14C	-0.2776	-0.782117	0.0038	0.108705
641339	ZNF674	0.2825	0.80222	0.0038	0.108705
506	ATP5B	0.2671	0.779692	0.0039	0.110053
3338	DNAJC4	-0.2593	-0.753726	0.0039	0.110053
9980	DOPEY2	0.2801	0.798849	0.0039	0.110053
26271	FBXO5	0.2967	0.821152	0.0039	0.110053
28998	MRPL13	0.2911	0.813889	0.0039	0.110053
4841	NONO	0.27	0.784099	0.0039	0.110053
11073	TOPBP1	0.2716	0.786498	0.0039	0.110053
11257	TP53TG1	-0.2852	-0.793038	0.0039	0.110053
218	ALDH3A1	-0.28497	-0.792715	0.004	0.110809
139231	FAM199X	0.2694	0.783194	0.004	0.110809
23560	GTPBP4	0.2693	0.783042	0.004	0.110809
80856	KIAA1715	0.2765	0.793697	0.004	0.110809
200634	KRTCAP3	-0.2658	-0.764158	0.004	0.110809
55183	RIF1	0.2794	0.797857	0.004	0.110809
58515	SELK	-0.2733	-0.775716	0.004	0.110809
12	SERPINA3	-0.2614	-0.757139	0.004	0.110809
83930	STARD3NL	0.25923	0.767331	0.004	0.110809
1890	TYMP	-0.2552	-0.746945	0.004	0.110809
27107	ZBTB11	0.26241	0.772397	0.004	0.110809
9711	KIAA0226	0.2623	0.772223	0.0041	0.111355
8462	KLF11	0.2643	0.775361	0.0041	0.111355
116064	LRRC58	0.276	0.792973	0.0041	0.111355
54545	MTMR12	0.2793	0.797714	0.0041	0.111355
84309	NUDT16L1	-0.266	-0.764472	0.0041	0.111355
150696	PROM2	0.2939	0.817553	0.0041	0.111355
25873	RPL36	-0.2637	-0.76083	0.0041	0.111355
6241	RRM2	0.2863	0.807455	0.0041	0.111355
51547	SIRT7	-0.2725	-0.774507	0.0041	0.111355
124565	SLC38A10	-0.2819	-0.788357	0.0041	0.111355
112574	SNX18	0.2716	0.786498	0.0041	0.111355
55751	TMEM184C	0.2789	0.797145	0.0041	0.111355
79863	C18orf22	-0.2791	-0.784312	0.0042	0.112061
388722	C1orf53	-0.2697	-0.770231	0.0042	0.112061
939	CD27	-0.2699	-0.770539	0.0042	0.112061
1739	DLG1	0.2748	0.791224	0.0042	0.112061
7403	KDM6A	0.2653	0.776916	0.0042	0.112061
28985	MCTS1	0.2888	0.81083	0.0042	0.112061
2956	MSH6	0.2736	0.789463	0.0042	0.112061
56114	PCDHGA1	0.258	0.765346	0.0042	0.112061
5471	PPAT	0.2854	0.806226	0.0042	0.112061
129831	RBM45	0.2621	0.771907	0.0042	0.112061
84292	WDR83	-0.2678	-0.767289	0.0042	0.112061
9824	ARHGAP11A	0.27	0.784099	0.0043	0.113456
513	ATP5D	-0.2674	-0.766666	0.0043	0.113456
10870	HCST	-0.2624	-0.75875	0.0043	0.113456
4222	MEOX1	-0.2916	-0.801857	0.0043	0.113456
80218	NAA50	0.2887	0.810696	0.0043	0.113456
653162	RPSAP9	-0.2903	-0.800093	0.0043	0.113456
27072	VPS41	0.2563	0.762578	0.0043	0.113456
9790	BMS1	0.2663	0.778462	0.0044	0.114821
55004	C11orf59	-0.2704	-0.771306	0.0044	0.114821
79794	C12orf49	0.284	0.804301	0.0044	0.114821
5252	PHF1	-0.2958	-0.807461	0.0044	0.114821
51195	RAPGEFL1	-0.2821	-0.788643	0.0044	0.114821
57187	THOC2	0.2844	0.804853	0.0044	0.114821
8459	TPST2	-0.2869	-0.795414	0.0044	0.114821
404550	C16orf74	-0.2875	-0.796247	0.0045	0.11544
10695	CNPY3	-0.2636	-0.760671	0.0045	0.11544
374393	FAM111B	0.292	0.815074	0.0045	0.11544
2176	FANCC	0.2784	0.796431	0.0045	0.11544
100128640	LOC100128640	-0.2754	-0.778862	0.0045	0.11544
9749	PHACTR2	0.2714	0.786199	0.0045	0.11544
5781	PTPN11	0.2566	0.763068	0.0045	0.11544
80854	SETD7	0.2782	0.796145	0.0045	0.11544
23410	SIRT3	-0.2526	-0.742562	0.0045	0.11544
55954	ZMAT5	-0.2607	-0.756006	0.0045	0.11544
9831	ZNF623	0.2763	0.793408	0.0045	0.11544
8697	CDC23	0.269	0.782588	0.0046	0.116215
55839	CENPN	0.2892	0.811366	0.0046	0.116215
80097	FAM128B	-0.2751	-0.778415	0.0046	0.116215
55336	FBXL8	-0.2735	-0.776017	0.0046	0.116215
257144	GCET2	-0.277	-0.781233	0.0046	0.116215
3658	IREB2	0.2583	0.765832	0.0046	0.116215
144363	LYRM5	-0.2762	-0.78005	0.0046	0.116215
80018	NAA25	0.257	0.763721	0.0046	0.116215
5920	RARRES3	-0.2577	-0.751099	0.0046	0.116215
90333	ZNF468	0.2826	0.80236	0.0046	0.116215
113451	ADC	-0.3029	-0.816614	0.0047	0.116966
339231	ARL16	-0.2922	-0.802667	0.0047	0.116966
112752	C14orf179	-0.2687	-0.768687	0.0047	0.116966
915	CD3D	-0.2676	-0.766978	0.0047	0.116966
150274	HSCB	-0.2639	-0.761149	0.0047	0.116966
100128164	LOC100128164	-0.2802	-0.785909	0.0047	0.116966
10531	PITRM1	0.2545	0.759616	0.0047	0.116966
124935	SLC43A2	-0.2539	-0.744761	0.0047	0.116966
85439	STON2	-0.257	-0.749942	0.0047	0.116966
131616	TMEM42	-0.2604	-0.755519	0.0047	0.116966
90557	CCDC74A	-0.2788	-0.783874	0.0048	0.117869
728656	DMRTC1B	-0.2823	-0.788929	0.0048	0.117869
54617	INO80	0.2563	0.762578	0.0048	0.117869
56112	PCDHGA3	0.2965	0.820897	0.0048	0.117869
56902	PNO1	0.2773	0.794852	0.0048	0.117869
29890	RBM15B	-0.264	-0.761308	0.0048	0.117869
8625	RFXANK	-0.2613	-0.756978	0.0048	0.117869
6884	TAF13	0.264	0.774893	0.0048	0.117869
7942	TFEB	-0.2685	-0.768377	0.0048	0.117869
153	ADRB1	-0.2739	-0.776619	0.0049	0.118576
391356	C2orf79	-0.2636	-0.760671	0.0049	0.118576
64122	FN3K	-0.266	-0.764472	0.0049	0.118576
3767	KCNJ11	-0.2557	-0.74778	0.0049	0.118576
143458	LDLRAD3	-0.2717	-0.773292	0.0049	0.118576
114569	MAL2	0.2504	0.752751	0.0049	0.118576
4861	NPAS1	-0.2564	-0.748946	0.0049	0.118576
5139	PDE3A	0.269	0.782588	0.0049	0.118576
6794	STK11	-0.2722	-0.774052	0.0049	0.118576
7416	VDAC1	0.2679	0.780915	0.0049	0.118576
84312	BRMS1L	0.2673	0.779998	0.005	0.118583
388759	C1orf229	-0.2841	-0.791488	0.005	0.118583
10589	DRAP1	-0.2634	-0.760351	0.005	0.118583
83444	INO80B	-0.2777	-0.782264	0.005	0.118583
57508	INTS2	0.2755	0.792246	0.005	0.118583
5917	RARS	0.2667	0.779078	0.005	0.118583
57139	RGL3	-0.2807	-0.786631	0.005	0.118583
51282	SCAND1	-0.2702	-0.770999	0.005	0.118583
29950	SERTAD1	-0.2484	-0.735345	0.005	0.118583
222865	TMEM130	-0.2756	-0.77916	0.005	0.118583
374395	TMEM179B	-0.2491	-0.73656	0.005	0.118583
23495	TNFRSF13B	-0.2823	-0.788929	0.005	0.118583
55850	USE1	-0.2675	-0.766822	0.005	0.118583
84272	YIPF4	0.2732	0.788873	0.005	0.118583
311	ANXA11	-0.2641	-0.761467	0.0051	0.119255
50650	ARHGEF3	-0.3013	-0.814586	0.0051	0.119255
9140	ATG12	0.2742	0.790345	0.0051	0.119255
388182	FLJ42289	-0.2771	-0.781381	0.0051	0.119255
23769	FLRT1	-0.2522	-0.741882	0.0051	0.119255
83450	LRRC48	-0.2774	-0.781823	0.0051	0.119255
84316	LSMD1	-0.2684	-0.768222	0.0051	0.119255
116068	LYSMD3	0.268	0.781068	0.0051	0.119255
10299	2015-03-06	0.2904	0.812963	0.0051	0.119255
23306	TMEM194A	0.2802	0.798991	0.0051	0.119255
55909	BIN3	-0.2594	-0.75389	0.0052	0.119744
672	BRCA1	0.2503	0.752581	0.0052	0.119744
22903	BTBD3	0.2597	0.768086	0.0052	0.119744
55848	C9orf46	-0.2688	-0.768841	0.0052	0.119744
8530	CST7	-0.2649	-0.762736	0.0052	0.119744
2874	GPS2	-0.2622	-0.758428	0.0052	0.119744
9885	OSBPL2	0.2686	0.781981	0.0052	0.119744
54881	TEX10	0.2509	0.753597	0.0052	0.119744
93643	TJAP1	-0.2848	-0.792476	0.0052	0.119744
84330	ZNF414	-0.2525	-0.742392	0.0052	0.119744
79986	ZNF702P	0.2766	0.793842	0.0052	0.119744
653784	FAM128A	-0.2711	-0.772377	0.0053	0.121208
51765	MST4	0.257	0.763721	0.0053	0.121208
157378	TMEM65	0.2734	0.789168	0.0053	0.121208
407977	TNFSF12-TNFSF13	-0.2795	-0.784894	0.0053	0.121208
114791	TUBGCP5	0.267	0.779538	0.0053	0.121208
26175	C14orf109	-0.2755	-0.779011	0.0054	0.121987
400360	C15orf54	0.277	0.79442	0.0054	0.121987
2879	GPX4	-0.2623	-0.758589	0.0054	0.121987
23185	LARP4B	0.2518	0.755114	0.0054	0.121987
154822	LOC154822	-0.2792	-0.784457	0.0054	0.121987
196264	MPZL3	0.2685	0.781829	0.0054	0.121987
6137	RPL13	-0.2683	-0.768066	0.0054	0.121987
54958	TMEM160	-0.2746	-0.777668	0.0054	0.121987
139596	UPRT	0.2557	0.761594	0.0054	0.121987
79697	C14orf169	-0.2457	-0.730616	0.0055	0.122093
8507	ENC1	0.27	0.784099	0.0055	0.122093
2107	ETF1	0.2585	0.766155	0.0055	0.122093
80199	FUZ	-0.273	-0.775263	0.0055	0.122093
3665	IRF7	-0.2598	-0.754543	0.0055	0.122093
4144	MAT2A	0.2598	0.768246	0.0055	0.122093
9848	MFAP3L	0.2473	0.747449	0.0055	0.122093
27085	MTBP	0.2565	0.762905	0.0055	0.122093
91807	MYLK3	0.2624	0.772381	0.0055	0.122093
100302692	NCRNA00182	0.27	0.784099	0.0055	0.122093
6731	SRP72	0.2634	0.773954	0.0055	0.122093
51322	WAC	0.251	0.753766	0.0055	0.122093
10467	ZNHIT1	-0.264	-0.761308	0.0055	0.122093
9547	CXCL14	-0.2671	-0.766197	0.0056	0.123326
81614	NIPA2	0.2766	0.793842	0.0056	0.123326
5730	PTGDS	-0.2788	-0.783874	0.0056	0.123326
55020	TTC38	-0.2564	-0.748946	0.0056	0.123326
29979	UBQLN1	0.259	0.766961	0.0056	0.123326
64145	ZFYVE20	0.2653	0.776916	0.0056	0.123326
84681	HINT2	-0.2582	-0.751922	0.0057	0.124214
3120	HLA-DQB2	-0.2597	-0.75438	0.0057	0.124214
3430	IFI35	-0.2451	-0.729556	0.0057	0.124214
4050	LTB	-0.2495	-0.737252	0.0057	0.124214
4926	NUMA1	-0.2848	-0.792476	0.0057	0.124214
23615	PYY2	-0.2616	-0.757462	0.0057	0.124214
6430	SFRS5	-0.293	-0.803741	0.0057	0.124214
51246	SHISA5	-0.2738	-0.776468	0.0057	0.124214
10965	ACOT2	-0.2339	-0.709105	0.0058	0.12476
84079	ANKRD27	0.2671	0.779692	0.0058	0.12476
1452	CSNK1A1	0.268	0.781068	0.0058	0.12476
2177	FANCD2	0.2437	0.74117	0.0058	0.12476
2875	GPT	-0.269	-0.769151	0.0058	0.12476
3001	GZMA	-0.2589	-0.753072	0.0058	0.12476
64112	MOAP1	-0.2591	-0.753399	0.0058	0.12476
79171	RBM42	-0.2551	-0.746777	0.0058	0.12476
7062	TCHH	0.26897	0.782543	0.0058	0.12476
24144	TFIP11	-0.2492	-0.736733	0.0058	0.12476
9744	ACAP1	-0.2647	-0.76242	0.0059	0.125024
23780	APOL2	-0.254	-0.74493	0.0059	0.125024
90871	C9orf123	-0.2492	-0.736733	0.0059	0.125024
9879	DDX46	0.233	0.721719	0.0059	0.125024
57689	LRRC4C	-0.2607	-0.756006	0.0059	0.125024
5597	MAPK6	0.2773	0.794852	0.0059	0.125024
79706	PRKRIP1	-0.2619	-0.757946	0.0059	0.125024
5718	PSMD12	0.283	0.802916	0.0059	0.125024
54407	SLC38A2	0.2706	0.785001	0.0059	0.125024
79856	SNX22	-0.2656	-0.763842	0.0059	0.125024
441151	TMEM151B	-0.2956	-0.807198	0.0059	0.125024
8755	ADAM6	-0.266	-0.764472	0.006	0.125024
120534	C11orf46	-0.2447	-0.728847	0.006	0.125024
57571	CARNS1	-0.2449	-0.729201	0.006	0.125024
6352	CCL5	-0.2601	-0.755031	0.006	0.125024
56882	CDC42SE1	0.2455	0.744326	0.006	0.125024
574029	DUSP5P	0.2692	0.782891	0.006	0.125024
348262	FAM195B	-0.2614	-0.757139	0.006	0.125024
3112	HLA-DOB	-0.2618	-0.757785	0.006	0.125024
3183	HNRNPC	-0.255	-0.74661	0.006	0.125024
57486	NLN	0.252	0.75545	0.006	0.125024
56103	PCDHGB2	0.269	0.782588	0.006	0.125024
27068	PPA2	0.2521	0.755618	0.006	0.125024
158234	RG9MTD3	-0.2617	-0.757623	0.006	0.125024
8871	SYNJ2	0.2808	0.799838	0.006	0.125024
10973	ASCC3	0.2612	0.770481	0.0061	0.126317
4791	NFKB2	-0.2479	-0.734475	0.0061	0.126317
79815	NIPAL2	0.2731	0.788725	0.0061	0.126317
5833	PCYT2	-0.2573	-0.750438	0.0061	0.126317
90326	THAP3	-0.2613	-0.756978	0.0061	0.126317
10808	HSPH1	0.2617	0.771274	0.0062	0.127437
144438	LOC144438	0.2834	0.803471	0.0062	0.127437
4832	NME3	-0.2491	-0.73656	0.0062	0.127437
56852	RAD18	0.2564	0.762741	0.0062	0.127437
5888	RAD51	0.2749	0.79137	0.0062	0.127437
29102	RNASEN	0.2457	0.744674	0.0062	0.127437
60489	APOBEC3G	-0.2414	-0.722937	0.0063	0.128069
280636	C11orf31	-0.2551	-0.746777	0.0063	0.128069
10591	C6orf108	-0.2659	-0.764315	0.0063	0.128069
283420	CLEC9A	-0.2883	-0.797353	0.0063	0.128069
89781	HPS4	-0.2641	-0.761467	0.0063	0.128069
4216	MAP3K4	0.272	0.787094	0.0063	0.128069
57664	PLEKHA4	-0.2627	-0.759231	0.0063	0.128069
6166	RPL36AL	-0.258	-0.751593	0.0063	0.128069
8239	USP9X	0.26	0.768567	0.0063	0.128069
57085	AGTRAP	-0.2477	-0.734126	0.0064	0.128688
9138	ARHGEF1	-0.2583	-0.752087	0.0064	0.128688
26038	CHD5	0.263	0.773326	0.0064	0.128688
29980	DONSON	0.261	0.770163	0.0064	0.128688
84514	GHDC	-0.2953	-0.806802	0.0064	0.128688
282997	LOC282997	-0.2598	-0.754543	0.0064	0.128688
6908	TBP	0.2638	0.77458	0.0064	0.128688
84336	TMEM101	-0.2639	-0.761149	0.0064	0.128688
54472	TOLLIP	-0.2517	-0.74103	0.0064	0.128688
122481	AK7	-0.2603	-0.755357	0.0065	0.129448
8900	CCNA1	-0.2633	-0.760192	0.0065	0.129448
916	CD3E	-0.262	-0.758107	0.0065	0.129448
9209	LRRFIP2	-0.2536	-0.744255	0.0065	0.129448
931	MS4A1	-0.2676	-0.766978	0.0065	0.129448
64324	NSD1	0.2607	0.769685	0.0065	0.129448
89765	RSPH1	-0.2614	-0.757139	0.0065	0.129448
56916	SMARCAD1	0.2498	0.751732	0.0065	0.129448
64431	ACTR6	0.2456	0.7445	0.0066	0.130194
51362	CDC40	0.2536	0.758123	0.0066	0.130194
25932	CLIC4	0.2692	0.782891	0.0066	0.130194
283726	FAM154B	-0.26	-0.754869	0.0066	0.130194
8139	GAN	0.2582	0.76567	0.0066	0.130194
54857	GDPD2	0.2631	0.773483	0.0066	0.130194
197131	UBR1	0.2544	0.759451	0.0066	0.130194
146845	WDR16	-0.2593	-0.753726	0.0066	0.130194
126792	B3GALT6	-0.2628	-0.759392	0.0067	0.131698
4141	MARS	0.2543	0.759285	0.0067	0.131698
5708	PSMD2	0.2663	0.778462	0.0067	0.131698
19	ABCA1	0.2513	0.754272	0.0068	0.13195
396	ARHGDIA	-0.2592	-0.753563	0.0068	0.13195
203260	CCDC107	-0.2516	-0.740859	0.0068	0.13195
1154	CISH	-0.2671	-0.766197	0.0068	0.13195
79132	DHX58	-0.2538	-0.744593	0.0068	0.13195
414918	FAM116B	-0.2569	-0.749776	0.0068	0.13195
84061	MAGT1	0.2473	0.747449	0.0068	0.13195
81031	SLC2A10	0.248	0.748654	0.0068	0.13195
643836	ZFP62	0.25518	0.760739	0.0068	0.13195
51663	ZFR	0.2737	0.78961	0.0068	0.13195
7626	ZNF75D	0.2486	0.749684	0.0068	0.13195
55814	BDP1	0.2503	0.752581	0.0069	0.133115
79415	C17orf62	-0.254	-0.74493	0.0069	0.133115
8338	HIST2H2AC	-0.249	-0.736387	0.0069	0.133115
146547	PRSS36	-0.271	-0.772225	0.0069	0.133115
79228	THOC6	-0.2569	-0.749776	0.0069	0.133115
675	BRCA2	0.2615	0.770957	0.007	0.133804
339229	C17orf90	-0.2802	-0.785909	0.007	0.133804
79172	CENPO	0.2698	0.783798	0.007	0.133804
286256	LCN12	-0.272	-0.773748	0.007	0.133804
100130093	LOC100130093	-0.2857	-0.79374	0.007	0.133804
30833	NT5C	-0.27081	-0.771934	0.007	0.133804
6143	RPL19	-0.2619	-0.757946	0.007	0.133804
23076	RRP1B	0.2552	0.760772	0.007	0.133804
220107	DLEU7	0.272	0.787094	0.0071	0.134327
64118	DUS1L	-0.2636	-0.760671	0.0071	0.134327
10495	ENOX2	0.2484	0.749341	0.0071	0.134327
54566	EPB41L4B	0.2646	0.775829	0.0071	0.134327
2116	ETV2	-0.259	-0.753236	0.0071	0.134327
65999	LRRC61	-0.247	-0.732902	0.0071	0.134327
641455	P704P	0.2249	0.706192	0.0071	0.134327
5774	PTPN3	0.2547	0.759947	0.0071	0.134327
155368	WBSCR27	-0.2545	-0.745771	0.0071	0.134327
253635	CCDC75	0.241	0.736374	0.0072	0.135603
23097	CDK19	0.2427	0.739402	0.0072	0.135603
146223	CMTM4	0.25645	0.762823	0.0072	0.135603
10577	NPC2	-0.2447	-0.728847	0.0072	0.135603
83543	AIF1L	0.2608	0.769844	0.0073	0.135948
1982	EIF4G2	0.2721	0.787242	0.0073	0.135948
3895	KTN1	0.2525	0.756288	0.0073	0.135948
751071	METTL12	-0.269	-0.769151	0.0073	0.135948
10787	NCKAP1	0.2571	0.763884	0.0073	0.135948
23165	NUP205	0.2529	0.756957	0.0073	0.135948
5557	PRIM1	0.2577	0.76486	0.0073	0.135948
6262	RYR2	0.2557	0.761594	0.0073	0.135948
124404	2015-09-12	-0.2672	-0.766353	0.0073	0.135948
54663	WDR74	-0.259	-0.753236	0.0073	0.135948
283431	GAS2L3	0.2351	0.725631	0.0074	0.136892
57576	KIF17	-0.2804	-0.786198	0.0074	0.136892
22877	MLXIP	0.2521	0.755618	0.0074	0.136892
5025	P2RX4	-0.2582	-0.751922	0.0074	0.136892
132160	PPM1M	-0.2583	-0.752087	0.0074	0.136892
5935	RBM3	-0.249	-0.736387	0.0074	0.136892
699	BUB1	0.2658	0.77769	0.0075	0.137671
891	CCNB1	0.2617	0.771274	0.0075	0.137671
2203	FBP1	-0.2554	-0.747279	0.0075	0.137671
143666	LOC143666	-0.2483	-0.735171	0.0075	0.137671
126003	TRAPPC5	-0.2413	-0.722757	0.0075	0.137671
80326	WNT10A	-0.2763	-0.780199	0.0075	0.137671
55689	YEATS2	0.247	0.746931	0.0075	0.137671
89839	ARHGAP11B	0.245	0.743452	0.0076	0.13859
127003	C1orf194	-0.2492	-0.736733	0.0076	0.13859
284001	CCDC57	-0.274	-0.776769	0.0076	0.13859
79139	DERL1	0.2589	0.7668	0.0076	0.13859
79977	GRHL2	0.2755	0.792246	0.0076	0.13859
81853	TMEM14B	-0.2542	-0.745267	0.0076	0.13859
115817	DHRS1	-0.2464	-0.731849	0.0077	0.139194
2817	GPC1	-0.2618	-0.757785	0.0077	0.139194
64761	PARP12	-0.2519	-0.741371	0.0077	0.139194
6462	SHBG	-0.2554	-0.747279	0.0077	0.139194
6812	STXBP1	0.2667	0.779078	0.0077	0.139194
348825	TPRXL	0.253	0.757124	0.0077	0.139194
7109	TRAPPC10	0.2377	0.73041	0.0077	0.139194
347733	TUBB2B	-0.2526	-0.742562	0.0077	0.139194
199990	C1orf86	-0.2526	-0.742562	0.0078	0.139938
23030	KDM4B	-0.2592	-0.753563	0.0078	0.139938
729991	LOC729991	-0.2637	-0.76083	0.0078	0.139938
4361	MRE11A	0.2575	0.764535	0.0078	0.139938
84955	NUDCD1	0.2664	0.778616	0.0078	0.139938
318	NUDT2	-0.2763	-0.780199	0.0078	0.139938
11334	TUSC2	-0.265	-0.762895	0.0078	0.139938
54934	C12orf41	0.2594	0.767605	0.0079	0.140476
150356	CHADL	-0.256	-0.74828	0.0079	0.140476
1654	DDX3X	0.2545	0.759616	0.0079	0.140476
2014	EMP3	-0.2522	-0.741882	0.0079	0.140476
4046	LSP1	-0.2571	-0.750107	0.0079	0.140476
81854	MGC3771	-0.2174	-0.676658	0.0079	0.140476
166	AES	-0.2504	-0.738803	0.008	0.140476
51596	CUTA	-0.25765	-0.751016	0.008	0.140476
317781	DDX51	-0.2678	-0.767289	0.008	0.140476
2319	FLOT2	-0.234	-0.709293	0.008	0.140476
2953	GSTT2	-0.2377	-0.716184	0.008	0.140476
26145	IRF2BP1	-0.247	-0.732902	0.008	0.140476
6236	RRAD	-0.252	-0.741541	0.008	0.140476
11066	SNRNP35	-0.24305	-0.725905	0.008	0.140476
84294	UTP23	0.2536	0.758123	0.008	0.140476
25776	CBY1	-0.2319	-0.705321	0.0081	0.140476
51167	CYB5R4	0.2472	0.747276	0.0081	0.140476
1565	CYP2D6	-0.2598	-0.754543	0.0081	0.140476
220382	FAM181B	-0.264	-0.761308	0.0081	0.140476
401375	GTF2IRD2P1	-0.2739	-0.776619	0.0081	0.140476
55295	KLHL26	-0.2525	-0.742392	0.0081	0.140476
113251	LARP4	0.2542	0.759119	0.0081	0.140476
79576	NKAP	0.2509	0.753597	0.0081	0.140476
79646	PANK3	0.2386	0.732047	0.0081	0.140476
5347	PLK1	0.2522	0.755785	0.0081	0.140476
23198	PSME4	0.2675	0.780304	0.0081	0.140476
83871	RAB34	-0.2474	-0.733602	0.0081	0.140476
57826	RAP2C	0.2505	0.75292	0.0081	0.140476
8698	S1PR4	-0.2421	-0.7242	0.0081	0.140476
342125	TMC3	-0.2775	-0.78197	0.0081	0.140476
403341	ZBTB34	0.2567	0.763232	0.0081	0.140476
7567	ZNF19	-0.2522	-0.741882	0.0081	0.140476
23468	CBX5	0.2526	0.756455	0.0082	0.141473
389741	MGC21881	-0.278	-0.782704	0.0082	0.141473
148932	MOBKL2C	-0.2461	-0.731321	0.0082	0.141473
125488	TTC39C	-0.26825	-0.767989	0.0082	0.141473
195828	ZNF367	0.2555	0.761265	0.0082	0.141473
55300	PI4K2B	0.2362	0.727661	0.0083	0.142461
6160	RPL31	-0.2471	-0.733077	0.0083	0.142461
6529	SLC6A1	0.259	0.766961	0.0083	0.142461
6689	SPIB	-0.2372	-0.71526	0.0083	0.142461
7494	XBP1	-0.2618	-0.757785	0.0083	0.142461
1535	CYBA	-0.2368	-0.71452	0.0084	0.142998
78988	MRP63	-0.2522	-0.741882	0.0084	0.142998
51667	NUB1	-0.249	-0.736387	0.0084	0.142998
55072	RNF31	-0.271	-0.772225	0.0084	0.142998
6181	RPLP2	-0.2494	-0.737079	0.0084	0.142998
23157	2015-09-06	-0.2492	-0.736733	0.0084	0.142998
23020	SNRNP200	0.2469	0.746758	0.0084	0.142998
7296	TXNRD1	0.2442	0.74205	0.0084	0.142998
10575	CCT4	0.2686	0.781981	0.0085	0.143526
168002	DACT2	-0.2719	-0.773596	0.0085	0.143526
285962	FLJ40852	-0.2532	-0.743579	0.0085	0.143526
29909	GPR171	-0.2548	-0.746275	0.0085	0.143526
3482	IGF2R	0.2473	0.747449	0.0085	0.143526
9643	MORF4L2	0.2378	0.730592	0.0085	0.143526
23117	NPIPL3	-0.239	-0.718572	0.0085	0.143526
11040	PIM2	-0.2509	-0.739661	0.0085	0.143526
79096	C11orf49	-0.254	-0.74493	0.0086	0.143697
29785	CYP2S1	-0.2571	-0.750107	0.0086	0.143697
2876	GPX1	-0.2464	-0.731849	0.0086	0.143697
3561	IL2RG	-0.2416	-0.723298	0.0086	0.143697
55388	MCM10	0.26	0.768567	0.0086	0.143697
84515	MCM8	0.2446	0.742752	0.0086	0.143697
51237	MGC29506	-0.247	-0.732902	0.0086	0.143697
22828	RBM16	0.2547	0.759947	0.0086	0.143697
85480	TSLP	-0.2686	-0.768532	0.0086	0.143697
9652	TTC37	0.2404	0.735298	0.0086	0.143697
262	AMD1	0.2565	0.762905	0.0087	0.143697
5199	CFP	-0.2543	-0.745435	0.0087	0.143697
1591	CYP24A1	-0.2788	-0.783874	0.0087	0.143697
9535	GMFG	-0.2493	-0.736906	0.0087	0.143697
253018	HCG27	-0.25892	-0.753105	0.0087	0.143697
3458	IFNG	-0.2699	-0.770539	0.0087	0.143697
8681	JMJD7-PLA2G4B	-0.252	-0.741541	0.0087	0.143697
9650	MTFR1	0.2605	0.769366	0.0087	0.143697
5716	PSMD10	0.262	0.771749	0.0087	0.143697
389362	PSMG4	-0.2583	-0.752087	0.0087	0.143697
9125	RQCD1	0.2535	0.757957	0.0087	0.143697
6716	SRD5A2	-0.2641	-0.761467	0.0087	0.143697
92949	ADAMTSL1	0.2555	0.761265	0.0088	0.143921
54908	CCDC99	0.2465	0.746065	0.0088	0.143921
2302	FOXJ1	-0.2374	-0.71563	0.0088	0.143921
134266	GRPEL2	0.2463	0.745718	0.0088	0.143921
8551	INE2	-0.266	-0.764472	0.0088	0.143921
23633	KPNA6	0.2545	0.759616	0.0088	0.143921
4682	NUBP1	-0.2458	-0.730793	0.0088	0.143921
64926	RASAL3	-0.2506	-0.739147	0.0088	0.143921
113675	SDSL	-0.2572	-0.750273	0.0088	0.143921
9760	TOX	-0.2429	-0.725637	0.0088	0.143921
55101	ATP5SL	-0.24653	-0.732077	0.0089	0.144421
196513	DCP1B	-0.2412	-0.722576	0.0089	0.144421
81624	DIAPH3	0.2506	0.75309	0.0089	0.144421
23463	ICMT	0.2551	0.760607	0.0089	0.144421
10400	PEMT	-0.2664	-0.765101	0.0089	0.144421
5521	PPP2R2B	-0.2354	-0.711916	0.0089	0.144421
399512	SLC25A35	-0.2557	-0.74778	0.0089	0.144421
170958	ZNF525	0.2364	0.728029	0.0089	0.144421
79587	CARS2	-0.246	-0.731145	0.009	0.145054
55036	CCDC40	-0.2685	-0.768377	0.009	0.145054
27161	EIF2C2	0.2526	0.756455	0.009	0.145054
3161	HMMR	0.2364	0.728029	0.009	0.145054
200879	LIPH	0.2563	0.762578	0.009	0.145054
9051	PSTPIP1	-0.2387	-0.718022	0.009	0.145054
345895	RSPH4A	-0.2332	-0.707785	0.009	0.145054
246	ALOX15	0.26	0.768567	0.0091	0.145539
840	CASP7	-0.2338	-0.708917	0.0091	0.145539
55584	CHRNA9	-0.2635	-0.760511	0.0091	0.145539
84824	FCRLA	-0.2516	-0.740859	0.0091	0.145539
51105	PHF20L1	0.2523	0.755953	0.0091	0.145539
5534	PPP3R1	0.2674	0.780151	0.0091	0.145539
94081	SFXN1	0.2502	0.752412	0.0091	0.145539
7411	VBP1	0.266	0.777999	0.0091	0.145539
79729	C1orf113	-0.2501	-0.738287	0.0092	0.145877
91689	C22orf32	-0.2436	-0.726889	0.0092	0.145877
81928	CABLES2	0.2429	0.739756	0.0092	0.145877
84269	CHCHD5	-0.2513	-0.740346	0.0092	0.145877
27336	HTATSF1	0.258	0.765346	0.0092	0.145877
60672	MIIP	-0.2432	-0.726174	0.0092	0.145877
140700	SAMD10	-0.2664	-0.765101	0.0092	0.145877
23753	SDF2L1	-0.24685	-0.732639	0.0092	0.145877
55236	UBA6	0.2515	0.754609	0.0092	0.145877
738	C11orf2	-0.2517	-0.74103	0.0093	0.145916
63939	C20orf177	0.248	0.748654	0.0093	0.145916
9134	CCNE2	0.244	0.741698	0.0093	0.145916
64641	EBF2	0.268	0.781068	0.0093	0.145916
2672	GFI1	-0.2463	-0.731673	0.0093	0.145916
100216545	LOC100216545	-0.2445	-0.728491	0.0093	0.145916
11243	PMF1	-0.2331	-0.707596	0.0093	0.145916
145482	PTGR2	-0.2402	-0.720762	0.0093	0.145916
22938	SNW1	-0.266	-0.764472	0.0093	0.145916
9880	ZBTB39	0.256	0.762086	0.0093	0.145916
79777	ACBD4	-0.2637	-0.76083	0.0094	0.145916
1521	CTSW	-0.2498	-0.73777	0.0094	0.145916
5062	PAK2	0.2469	0.746758	0.0094	0.145916
5327	PLAT	-0.2341	-0.709481	0.0094	0.145916
10955	SERINC3	0.256	0.762086	0.0094	0.145916
6502	SKP2	0.2476	0.747966	0.0094	0.145916
285386	TPRG1	-0.2459	-0.730969	0.0094	0.145916
741	ZNHIT2	-0.2484	-0.735345	0.0094	0.145916
129138	ANKRD54	-0.2445	-0.728491	0.0095	0.145916
2780	GNAT2	0.2552	0.760772	0.0095	0.145916
80328	ULBP2	0.2702	0.7844	0.0095	0.145916
923	CD6	-0.2424	-0.724739	0.0096	0.145916
10153	CEBPZ	0.246	0.745197	0.0096	0.145916
22995	CEP152	0.2403	0.735118	0.0096	0.145916
84265	POLR3GL	-0.2451	-0.729556	0.0096	0.145916
63977	PRDM15	0.2447	0.742927	0.0096	0.145916
23616	SH3BP1	-0.2365	-0.713964	0.0096	0.145916
8914	TIMELESS	0.2601	0.768727	0.0096	0.145916
56949	XAB2	-0.2553	-0.747112	0.0096	0.145916
1981	EIF4G1	0.2429	0.739756	0.0097	0.145916
642587	LOC642587	-0.249	-0.736387	0.0097	0.145916
29937	NENF	-0.2425	-0.724919	0.0097	0.145916
64976	MRPL40	-0.2345	-0.710232	0.0098	0.145916
100272147	MTCP1NB	-0.24	-0.720398	0.0098	0.145916
653583	PHLDB3	-0.2517	-0.74103	0.0098	0.145916
333926	PPM1J	-0.2545	-0.745771	0.0098	0.145916
10268	RAMP3	-0.2332	-0.707785	0.0098	0.145916
54790	TET2	0.2465	0.746065	0.0098	0.145916
80329	ULBP1	0.259	0.766961	0.0098	0.145916
27443	CECR2	0.2507	0.753259	0.0099	0.145916
91687	CENPL	0.2367	0.72858	0.0099	0.145916
2936	GSR	0.2412	0.736732	0.0099	0.145916
57563	KLHL8	0.2508	0.753428	0.0099	0.145916
6873	TAF2	0.2413	0.73691	0.0099	0.145916
7566	ZNF18	-0.24805	-0.734736	0.0099	0.145916
2180	ACSL1	0.2479	0.748483	0.01	0.145916
50808	AK3	-0.249	-0.736387	0.01	0.145916
572	BAD	-0.253	-0.74324	0.01	0.145916
85319	BAGE2	0.2354	0.726186	0.01	0.145916
55212	BBS7	0.2348	0.725075	0.01	0.145916
84520	C14orf142	-0.257	-0.749942	0.01	0.145916
90417	C15orf23	0.2534	0.757791	0.01	0.145916
755	C21orf2	-0.2632	-0.760032	0.01	0.145916
92749	C2orf39	-0.2377	-0.716184	0.01	0.145916
253714	C6orf167	0.2578	0.765022	0.01	0.145916
221908	C7orf47	-0.2461	-0.731321	0.01	0.145916
910	CD1B	-0.2749	-0.778116	0.01	0.145916
27098	CLUL1	-0.2464	-0.731849	0.01	0.145916
8453	CUL2	0.2403	0.735118	0.01	0.145916
10901	DHRS4	-0.2422	-0.72438	0.01	0.145916
147991	DPY19L3	0.2584	0.765993	0.01	0.145916
196403	DTX3	-0.2515	-0.740688	0.01	0.145916
1870	E2F2	0.2594	0.767605	0.01	0.145916
1894	ECT2	0.2527	0.756623	0.01	0.145916
79180	EFHD2	-0.2347	-0.710607	0.01	0.145916
8637	EIF4EBP3	-0.248	-0.734649	0.01	0.145916
219670	ENKUR	-0.2334	-0.708163	0.01	0.145916
54845	ESRP1	0.2544	0.759451	0.01	0.145916
93343	FAM125A	-0.2505	-0.738975	0.01	0.145916
6468	FBXW4	-0.2475	-0.733777	0.01	0.145916
63979	FIGNL1	0.2377	0.73041	0.01	0.145916
25794	FSCN2	-0.2544	-0.745603	0.01	0.145916
64396	GMCL1L	0.232	0.71984	0.01	0.145916
2932	GSK3B	0.2665	0.77877	0.01	0.145916
3149	HMGB3	0.2474	0.747621	0.01	0.145916
55272	IMP3	-0.2423	-0.72456	0.01	0.145916
91012	LASS5	-0.2327	-0.706839	0.01	0.145916
7873	MANF	-0.2608	-0.756168	0.01	0.145916
55233	MOBKL1B	0.243	0.739934	0.01	0.145916
8572	PDLIM4	-0.2399	-0.720216	0.01	0.145916
5238	PGM3	0.24368	0.741135	0.01	0.145916
5291	PIK3CB	0.2401	0.734758	0.01	0.145916
55660	PRPF40A	0.2603	0.769047	0.01	0.145916
55647	RAB20	-0.2454	-0.730086	0.01	0.145916
5929	RBBP5	0.2557	0.761594	0.01	0.145916
440400	RNASEK	-0.264	-0.761308	0.01	0.145916
6136	RPL12	-0.2414	-0.722937	0.01	0.145916
6229	RPS24	-0.2489	-0.736213	0.01	0.145916
6491	STIL	0.2565	0.762905	0.01	0.145916
57465	TBC1D24	0.259	0.766961	0.01	0.145916
7529	YWHAB	0.256	0.762086	0.01	0.145916
3267	AGFG1	0.2355	0.726371	0.011	0.149746
217	ALDH2	-0.25	-0.738115	0.011	0.149746
84266	ALKBH7	-0.2402	-0.720762	0.011	0.149746
54882	ANKHD1	0.2411	0.736553	0.011	0.149746
80833	APOL3	-0.2373	-0.715445	0.011	0.149746
55937	APOM	-0.2356	-0.71229	0.011	0.149746
27113	BBC3	-0.2455	-0.730263	0.011	0.149746
57448	BIRC6	0.2304	0.716812	0.011	0.149746
10904	BLCAP	-0.2515	-0.740688	0.011	0.149746
90427	BMF	0.2499	0.751902	0.011	0.149746
60686	C14orf93	-0.239	-0.718572	0.011	0.149746
100134934	C17orf106	-0.2498	-0.73777	0.011	0.149746
814	CAMK4	-0.2593	-0.753726	0.011	0.149746
55259	CASC1	-0.2356	-0.71229	0.011	0.149746
26112	CCDC69	-0.2443	-0.728136	0.011	0.149746
11007	CCDC85B	-0.2467	-0.732376	0.011	0.149746
90324	CCDC97	-0.2291	-0.699955	0.011	0.149746
22948	CCT5	0.2657	0.777536	0.011	0.149746
930	CD19	-0.246	-0.731145	0.011	0.149746
914	CD2	-0.2431	-0.725995	0.011	0.149746
64405	CDH22	-0.2762	-0.78005	0.011	0.149746
4680	CEACAM6	0.24	0.734578	0.011	0.149746
54921	CHTF8	0.2299	0.71586	0.011	0.149746
1262	CNGA4	-0.2476	-0.733951	0.011	0.149746
1434	CSE1L	0.2627	0.772854	0.011	0.149746
2833	CXCR3	-0.2444	-0.728314	0.011	0.149746
79077	DCTPP1	0.2624	0.772381	0.011	0.149746
317749	DHRS4L2	-0.235	-0.711169	0.011	0.149746
1738	DLD	0.2402	0.734938	0.011	0.149746
317649	EIF4E3	-0.26	-0.754869	0.011	0.149746
157769	FAM91A1	0.2307	0.717382	0.011	0.149746
2218	FKTN	0.2461	0.74537	0.011	0.149746
652968	GATSL3	-0.241	-0.722214	0.011	0.149746
2665	GDI2	0.2425	0.739047	0.011	0.149746
9837	GINS1	0.2506	0.75309	0.011	0.149746
9446	GSTO1	-0.2477	-0.734126	0.011	0.149746
3003	GZMK	-0.2496	-0.737425	0.011	0.149746
3005	H1F0	-0.2442	-0.727958	0.011	0.149746
374875	HSD11B1L	-0.2349	-0.710982	0.011	0.149746
7923	HSD17B8	-0.2408	-0.721851	0.011	0.149746
8519	IFITM1	-0.2277	-0.697242	0.011	0.149746
122961	ISCA2	-0.2402	-0.720762	0.011	0.149746
8690	JRKL	0.234	0.723588	0.011	0.149746
79734	KCTD17	-0.2465	-0.732025	0.011	0.149746
27040	LAT	-0.237	-0.714891	0.011	0.149746
388789	LOC388789	-0.2317	-0.70494	0.011	0.149746
10233	LRRC23	-0.2346	-0.71042	0.011	0.149746
151827	LRRC34	-0.2415	-0.723118	0.011	0.149746
346389	MACC1	0.2542	0.759119	0.011	0.149746
55777	MBD5	0.251	0.753766	0.011	0.149746
10893	MMP24	-0.2511	-0.740004	0.011	0.149746
4608	MYBPH	-0.2553	-0.747112	0.011	0.149746
642976	NCRNA00110	-0.2787	-0.783728	0.011	0.149746
4713	NDUFB7	-0.236	-0.713035	0.011	0.149746
340527	NHSL2	0.2513	0.754272	0.011	0.149746
8382	NME5	-0.244	-0.727602	0.011	0.149746
5194	PEX13	0.2481	0.748826	0.011	0.149746
5366	PMAIP1	-0.2405	-0.721307	0.011	0.149746
55851	PSENEN	-0.2335	-0.708351	0.011	0.149746
10266	RAMP2	-0.2376	-0.715999	0.011	0.149746
5930	RBBP6	0.241	0.736374	0.011	0.149746
220441	RNF152	0.2293	0.714714	0.011	0.149746
6158	RPL28	-0.2402	-0.720762	0.011	0.149746
6194	RPS6	-0.253	-0.74324	0.011	0.149746
84816	RTN4IP1	0.2497	0.751562	0.011	0.149746
989	2015-09-07	0.2521	0.755618	0.011	0.149746
151648	SGOL1	0.241	0.736374	0.011	0.149746
10603	SH2B2	-0.2382	-0.717104	0.011	0.149746
59307	SIGIRR	-0.2338	-0.708917	0.011	0.149746
4090	SMAD5	0.248	0.748654	0.011	0.149746
6625	SNRNP70	-0.243	-0.725816	0.011	0.149746
84958	SYTL1	-0.2646	-0.762261	0.011	0.149746
6881	TAF10	-0.2319	-0.705321	0.011	0.149746
7007	TECTA	0.252	0.75545	0.011	0.149746
26277	TINF2	-0.2348	-0.710795	0.011	0.149746
79809	TTC21B	0.2546	0.759782	0.011	0.149746
143941	TTC36	-0.249	-0.736387	0.011	0.149746
29089	UBE2T	0.2332	0.722094	0.011	0.149746
9960	USP3	0.238	0.730957	0.011	0.149746
55737	VPS35	0.2464	0.745891	0.011	0.149746
65266	WNK4	-0.259	-0.753236	0.011	0.149746
221302	ZUFSP	0.257	0.763721	0.011	0.149746
5826	ABCD4	-0.2534	-0.743917	0.012	0.154276
95	ACY1	-0.2466	-0.7322	0.012	0.154276
27125	AFF4	0.2459	0.745023	0.012	0.154276
57538	ALPK3	0.2334	0.722468	0.012	0.154276
397	ARHGDIB	-0.2443	-0.728136	0.012	0.154276
79370	BCL2L14	-0.2465	-0.732025	0.012	0.154276
8553	BHLHE40	-0.2523	-0.742052	0.012	0.154276
2186	BPTF	0.2408	0.736015	0.012	0.154276
79839	CCDC102B	0.2404	0.735298	0.012	0.154276
9857	CEP350	0.2466	0.746238	0.012	0.154276
25978	CHMP2B	0.2326	0.720969	0.012	0.154276
150468	CKAP2L	0.2368	0.728763	0.012	0.154276
25822	DNAJB5	-0.2482	-0.734997	0.012	0.154276
79980	DSN1	0.238	0.730957	0.012	0.154276
2058	EPRS	0.2426	0.739225	0.012	0.154276
2140	EYA3	0.224	0.704423	0.012	0.154276
79072	FASTKD3	0.2384	0.731684	0.012	0.154276
752	FMNL1	-0.2367	-0.714335	0.012	0.154276
9908	G3BP2	0.2234	0.703239	0.012	0.154276
348654	GEN1	0.245	0.743452	0.012	0.154276
10691	GMEB1	0.2407	0.735836	0.012	0.154276
23526	HMHA1	-0.24388	-0.727388	0.012	0.154276
253430	IPMK	0.233	0.721719	0.012	0.154276
3836	KPNA1	0.2585	0.766155	0.012	0.154276
3852	KRT5	-0.24	-0.720398	0.012	0.154276
3953	LEPR	0.261	0.770163	0.012	0.154276
56262	LRRC8A	0.2332	0.722094	0.012	0.154276
7940	LST1	-0.231	-0.703605	0.012	0.154276
4085	MAD2L1	0.2465	0.746065	0.012	0.154276
5605	MAP2K2	-0.2288	-0.699375	0.012	0.154276
2847	MCHR1	-0.2517	-0.74103	0.012	0.154276
414919	MGC70857	-0.2368	-0.71452	0.012	0.154276
4301	MLLT4	0.2311	0.71814	0.012	0.154276
83661	MS4A8B	-0.2652	-0.763211	0.012	0.154276
55922	NKRF	0.2496	0.751392	0.012	0.154276
8602	NOP14	0.248	0.748654	0.012	0.154276
93129	ORAI3	-0.2311	-0.703796	0.012	0.154276
23252	OTUD3	0.2398	0.734218	0.012	0.154276
55066	PDPR	0.2462	0.745544	0.012	0.154276
26279	PLA2G2D	-0.243	-0.725816	0.012	0.154276
9240	PNMA1	-0.236	-0.713035	0.012	0.154276
5707	PSMD1	0.247	0.746931	0.012	0.154276
5713	PSMD7	0.2496	0.751392	0.012	0.154276
114971	PTPMT1	-0.2344	-0.710045	0.012	0.154276
5778	PTPN7	-0.2315	-0.704559	0.012	0.154276
5978	REST	0.2423	0.738692	0.012	0.154276
10636	RGS14	-0.22832	-0.698446	0.012	0.154276
55206	SBNO1	0.2358	0.726924	0.012	0.154276
256380	SCML4	-0.2411	-0.722395	0.012	0.154276
56920	SEMA3G	-0.2608	-0.756168	0.012	0.154276
1731	2015-09-01	-0.2455	-0.730263	0.012	0.154276
9047	SH2D2A	-0.234	-0.709293	0.012	0.154276
11001	SLC27A2	-0.228	-0.697825	0.012	0.154276
55676	SLC30A6	0.2349	0.72526	0.012	0.154276
6640	SNTA1	-0.2412	-0.722576	0.012	0.154276
8724	SNX3	0.2554	0.761101	0.012	0.154276
6713	SQLE	0.261	0.770163	0.012	0.154276
10629	TAF6L	-0.2567	-0.749444	0.012	0.154276
126259	TMIGD2	-0.2521	-0.741712	0.012	0.154276
7127	TNFAIP2	-0.2342	-0.709669	0.012	0.154276
7263	TST	-0.2313	-0.704178	0.012	0.154276
51061	TXNDC11	-0.2413	-0.722757	0.012	0.154276
80019	UBTD1	-0.2398	-0.720033	0.012	0.154276
55432	YOD1	0.2359	0.727109	0.012	0.154276
7988	ZNF212	-0.2516	-0.740859	0.012	0.154276
170959	ZNF431	0.2375	0.730045	0.012	0.154276
9668	ZNF432	0.2467	0.746411	0.012	0.154276
147657	ZNF480	0.2532	0.757457	0.012	0.154276
22847	ZNF507	0.2459	0.745023	0.012	0.154276
90317	ZNF616	0.239	0.732773	0.012	0.154276
27332	ZNF638	0.2549	0.760277	0.012	0.154276
79894	ZNF672	-0.2467	-0.732376	0.012	0.154276
37	ACADVL	-0.25	-0.738115	0.013	0.162368
140	ADORA3	0.2497	0.751562	0.013	0.162368
125061	AFMID	-0.2383	-0.717288	0.013	0.162368
196394	AMN1	-0.2358	-0.712662	0.013	0.162368
282679	AQP11	-0.2392	-0.718938	0.013	0.162368
51329	ARL6IP4	-0.2301	-0.70188	0.013	0.162368
400223	C14orf181	-0.2522	-0.741882	0.013	0.162368
80233	C17orf70	-0.2535	-0.744086	0.013	0.162368
400793	C1orf226	-0.2487	-0.735866	0.013	0.162368
221481	C6orf81	-0.23	-0.701688	0.013	0.162368
822	CAPG	-0.2432	-0.726174	0.013	0.162368
925	CD8A	-0.248	-0.734649	0.013	0.162368
10980	COPS6	-0.2301	-0.70188	0.013	0.162368
23373	CRTC1	-0.2357	-0.712476	0.013	0.162368
4072	EPCAM	0.256	0.762086	0.013	0.162368
1161	ERCC8	0.2252	0.70678	0.013	0.162368
2769	GNA15	-0.2362	-0.713407	0.013	0.162368
160897	GPR180	0.2408	0.736015	0.013	0.162368
92255	LMBRD2	0.2313	0.718519	0.013	0.162368
283663	LOC283663	-0.2392	-0.718938	0.013	0.162368
390595	LOC390595	-0.2618	-0.757785	0.013	0.162368
4145	MATK	-0.2337	-0.708728	0.013	0.162368
84954	MPND	-0.235	-0.711169	0.013	0.162368
162417	NAGS	-0.2548	-0.746275	0.013	0.162368
63899	NSUN3	0.2357	0.72674	0.013	0.162368
8544	PIR	0.2436	0.740993	0.013	0.162368
84919	PPP1R15B	0.24206	0.738266	0.013	0.162368
10213	PSMD14	0.265	0.776451	0.013	0.162368
6188	RPS3	-0.2444	-0.728314	0.013	0.162368
81894	SLC25A28	-0.239	-0.718572	0.013	0.162368
8140	SLC7A5	0.2477	0.748138	0.013	0.162368
9887	SMG7	0.2305	0.717002	0.013	0.162368
6872	TAF1	0.2379	0.730774	0.013	0.162368
79867	TCTN2	-0.2424	-0.724739	0.013	0.162368
7040	TGFB1	-0.2537	-0.744424	0.013	0.162368
163590	TOR1AIP2	0.2549	0.760277	0.013	0.162368
9694	TTC35	0.236	0.727293	0.013	0.162368
10773	ZBTB6	0.2284	0.712988	0.013	0.162368
23527	ACAP2	0.2252	0.70678	0.014	0.16805
64746	ACBD3	0.24	0.734578	0.014	0.16805
247	ALOX15B	-0.2444	-0.728314	0.014	0.16805
335	APOA1	-0.249	-0.736387	0.014	0.16805
55017	C14orf119	-0.2402	-0.720762	0.014	0.16805
11161	C14orf1	-0.2372	-0.71526	0.014	0.16805
79701	C17orf101	-0.2278	-0.697436	0.014	0.16805
284422	C19orf77	-0.2414	-0.722937	0.014	0.16805
84996	C21orf119	-0.2441	-0.72778	0.014	0.16805
389084	C2orf82	-0.2585	-0.752416	0.014	0.16805
375444	C5orf34	0.2355	0.726371	0.014	0.16805
441108	C5orf56	-0.2434	-0.726531	0.014	0.16805
55847	CISD1	0.2459	0.745023	0.014	0.16805
57472	CNOT6	0.2375	0.730045	0.014	0.16805
10898	CPSF4	-0.2482	-0.734997	0.014	0.16805
9696	CROCC	-0.2472	-0.733252	0.014	0.16805
27065	D4S234E	-0.2422	-0.72438	0.014	0.16805
2079	ERH	-0.2379	-0.716552	0.014	0.16805
441518	FAM127C	0.2335	0.722655	0.014	0.16805
57697	FANCM	0.2465	0.746065	0.014	0.16805
10817	FRS3	-0.2431	-0.725995	0.014	0.16805
94104	GCFC1	0.2304	0.716812	0.014	0.16805
221393	GPR115	0.2541	0.758954	0.014	0.16805
2946	GSTM2	-0.2312	-0.703987	0.014	0.16805
3000	GUCY2D	-0.2358	-0.712662	0.014	0.16805
2995	GYPC	-0.2335	-0.708351	0.014	0.16805
8692	HYAL2	-0.2322	-0.705891	0.014	0.16805
3652	IPP	0.2255	0.707366	0.014	0.16805
11014	KDELR2	0.2363	0.727845	0.014	0.16805
3845	KRAS	0.2435	0.740817	0.014	0.16805
100129534	LOC100129534	-0.2202	-0.682363	0.014	0.16805
440925	LOC440925	-0.2487	-0.735866	0.014	0.16805
7804	LRP8	0.2228	0.702051	0.014	0.16805
123872	LRRC50	-0.2376	-0.715999	0.014	0.16805
55341	LSG1	0.233	0.721719	0.014	0.16805
9969	MED13	0.2474	0.747621	0.014	0.16805
23269	MGA	0.2323	0.720405	0.014	0.16805
401884	MGC57346	0.236	0.727293	0.014	0.16805
51263	MRPL30	0.233	0.721719	0.014	0.16805
4843	NOS2	0.2431	0.74011	0.014	0.16805
54760	PCSK4	-0.2531	-0.74341	0.014	0.16805
5717	PSMD11	0.248	0.748654	0.014	0.16805
5859	QARS	-0.2309	-0.703414	0.014	0.16805
6050	RNH1	-0.2417	-0.723479	0.014	0.16805
9475	ROCK2	0.2263	0.708926	0.014	0.16805
388524	RPSAP58	-0.2467	-0.732376	0.014	0.16805
8175	SF3A2	-0.2208	-0.683575	0.014	0.16805
6472	SHMT2	0.254	0.758788	0.014	0.16805
10617	STAMBP	0.2419	0.737981	0.014	0.16805
83590	TMUB1	-0.2415	-0.723118	0.014	0.16805
79739	TTLL7	0.2328	0.721344	0.014	0.16805
7343	UBTF	-0.2387	-0.718022	0.014	0.16805
57209	ZNF248	0.2308	0.717571	0.014	0.16805
126299	ZNF428	-0.2294	-0.700533	0.014	0.16805
81569	ACTL8	0.2276	0.711446	0.015	0.172469
9546	APBA3	-0.2326	-0.70665	0.015	0.172469
57492	ARID1B	0.2425	0.739047	0.015	0.172469
55130	ARMC4	-0.2335	-0.708351	0.015	0.172469
79915	ATAD5	0.2286	0.713372	0.015	0.172469
552	AVPR1A	0.2497	0.751562	0.015	0.172469
656	BMP8B	0.2442	0.74205	0.015	0.172469
170487	C20orf134	-0.2333	-0.707974	0.015	0.172469
140701	C20orf135	-0.2548	-0.746275	0.015	0.172469
51372	CCDC72	-0.2411	-0.722395	0.015	0.172469
221016	CCDC7	0.2235	0.703437	0.015	0.172469
894	CCND2	-0.2342	-0.709669	0.015	0.172469
1145	CHRNE	-0.2313	-0.704178	0.015	0.172469
55748	CNDP2	-0.215	-0.671703	0.015	0.172469
1621	DBH	-0.2486	-0.735693	0.015	0.172469
1737	DLAT	0.2524	0.756121	0.015	0.172469
51295	ECSIT	-0.2363	-0.713593	0.015	0.172469
1977	EIF4E	0.221	0.698463	0.015	0.172469
90167	FRMD7	0.2455	0.744326	0.015	0.172469
84340	GFM2	0.212	0.679991	0.015	0.172469
2677	GGCX	0.2288	0.713756	0.015	0.172469
3422	IDI1	0.2533	0.757624	0.015	0.172469
83982	IFI27L2	-0.22584	-0.693606	0.015	0.172469
10068	IL18BP	-0.202	-0.643796	0.015	0.172469
27130	INVS	0.2188	0.694031	0.015	0.172469
3659	IRF1	-0.2253	-0.692544	0.015	0.172469
23325	KIAA1033	0.2232	0.702844	0.015	0.172469
23095	KIF1B	0.246	0.745197	0.015	0.172469
89953	KLC4	-0.2478	-0.734301	0.015	0.172469
100271836	LOC100271836	0.2397	0.734038	0.015	0.172469
440354	LOC440354	0.2229	0.702249	0.015	0.172469
647288	LOC647288	0.2245	0.705407	0.015	0.172469
728323	LOC728323	0.2383	0.731502	0.015	0.172469
79888	LPCAT1	0.2377	0.73041	0.015	0.172469
84859	LRCH3	0.2286	0.713372	0.015	0.172469
4123	MAN2C1	-0.25	-0.738115	0.015	0.172469
283385	MORN3	-0.2221	-0.686187	0.015	0.172469
116540	MRPL53	-0.238	-0.716736	0.015	0.172469
55149	MTPAP	0.2364	0.728029	0.015	0.172469
4604	MYBPC1	-0.2431	-0.725995	0.015	0.172469
342977	NANOS3	-0.2238	-0.689577	0.015	0.172469
5133	PDCD1	-0.22	-0.681958	0.015	0.172469
5281	PIGF	0.2228	0.702051	0.015	0.172469
257000	PLAC2	0.2376	0.730227	0.015	0.172469
25953	PNKD	-0.2325	-0.70646	0.015	0.172469
27343	POLL	-0.2592	-0.753563	0.015	0.172469
5861	RAB1A	0.2466	0.746238	0.015	0.172469
6135	RPL11	-0.2254	-0.692741	0.015	0.172469
56256	SERTAD4	0.2286	0.713372	0.015	0.172469
147912	SIX5	-0.2381	-0.71692	0.015	0.172469
292	SLC25A5	0.2396	0.733857	0.015	0.172469
29985	SLC39A3	-0.2397	-0.719851	0.015	0.172469
6732	SRPK1	0.2489	0.750197	0.015	0.172469
80765	STARD5	-0.2306	-0.702839	0.015	0.172469
6788	STK3	0.2339	0.723401	0.015	0.172469
114795	TMEM132B	0.2315	0.718897	0.015	0.172469
57570	TRMT5	-0.2485	-0.735519	0.015	0.172469
25809	TTLL1	-0.2239	-0.689776	0.015	0.172469
113457	TUBA3D	-0.2443	-0.728136	0.015	0.172469
84135	UTP15	0.23411	0.723793	0.015	0.172469
54521	WDR44	0.2275	0.711253	0.015	0.172469
6059	ABCE1	0.2415	0.737267	0.016	0.176647
122970	ACOT4	-0.2019	-0.643574	0.016	0.176647
80221	ACSF2	-0.2245	-0.690965	0.016	0.176647
79934	ADCK4	-0.2351	-0.711356	0.016	0.176647
121642	ALKBH2	-0.2333	-0.707974	0.016	0.176647
64682	ANAPC1	0.2312	0.718329	0.016	0.176647
398	ARHGDIG	-0.2402	-0.720762	0.016	0.176647
201229	C17orf108	-0.2457	-0.730616	0.016	0.176647
81563	C1orf21	-0.2214	-0.684783	0.016	0.176647
128977	C22orf39	-0.2273	-0.696463	0.016	0.176647
84733	CBX2	0.2415	0.737267	0.016	0.176647
79714	CCDC51	-0.2476	-0.733951	0.016	0.176647
994	CDC25B	0.2073	0.669985	0.016	0.176647
1048	CEACAM5	0.2206	0.697661	0.016	0.176647
1121	CHM	0.2349	0.72526	0.016	0.176647
9793	CKAP5	0.2332	0.722094	0.016	0.176647
1213	CLTC	0.237	0.72913	0.016	0.176647
8200	GDF5	-0.241	-0.722214	0.016	0.176647
170575	GIMAP1	-0.2354	-0.711916	0.016	0.176647
2823	GPM6A	-0.2434	-0.726531	0.016	0.176647
29899	GPSM2	0.2279	0.712025	0.016	0.176647
27190	IL17B	-0.2332	-0.707785	0.016	0.176647
3683	ITGAL	-0.2286	-0.698988	0.016	0.176647
8997	KALRN	0.2132	0.682506	0.016	0.176647
10524	KAT5	-0.224	-0.689974	0.016	0.176647
23416	KCNH3	-0.2299	-0.701496	0.016	0.176647
647121	LOC647121	-0.2319	-0.705321	0.016	0.176647
4063	LY9	-0.2314	-0.704368	0.016	0.176647
9440	MED17	0.2441	0.741874	0.016	0.176647
9112	MTA1	-0.22341	-0.688802	0.016	0.176647
4886	NPY1R	-0.241	-0.722214	0.016	0.176647
4905	NSF	0.23835	0.731593	0.016	0.176647
127700	OSCP1	-0.2289	-0.699568	0.016	0.176647
23598	PATZ1	-0.2187	-0.679317	0.016	0.176647
5162	PDHB	-0.2366	-0.714149	0.016	0.176647
54704	PDP1	0.2293	0.714714	0.016	0.176647
5251	PHEX	0.2269	0.710091	0.016	0.176647
254295	PHYHD1	-0.2186	-0.679113	0.016	0.176647
122618	PLD4	-0.25997	-0.75482	0.016	0.176647
57104	PNPLA2	-0.258	-0.751593	0.016	0.176647
29964	PRICKLE4	-0.258	-0.751593	0.016	0.176647
23108	RAP1GAP2	0.218	0.692405	0.016	0.176647
8787	RGS9	-0.2196	-0.681147	0.016	0.176647
9805	SCRN1	0.2227	0.701853	0.016	0.176647
9792	SERTAD2	0.2212	0.698864	0.016	0.176647
122060	SLAIN1	-0.224	-0.689974	0.016	0.176647
146802	SLC47A2	-0.2369	-0.714705	0.016	0.176647
25876	SPEF1	-0.228	-0.697825	0.016	0.176647
26039	SS18L1	0.2377	0.73041	0.016	0.176647
219736	STOX1	-0.2152	-0.672118	0.016	0.176647
1155	TBCB	-0.2283	-0.698407	0.016	0.176647
55365	TMEM176A	-0.2166	-0.675013	0.016	0.176647
161145	TMEM229B	-0.234	-0.709293	0.016	0.176647
9246	UBE2L6	-0.2158	-0.673361	0.016	0.176647
7360	UGP2	0.2385	0.731866	0.016	0.176647
331	XIAP	0.2361	0.727477	0.016	0.176647
253943	YTHDF3	0.2201	0.696656	0.016	0.176647
9189	ZBED1	-0.2321	-0.705701	0.016	0.176647
23099	ZBTB43	0.2473	0.747449	0.016	0.176647
23174	ZCCHC14	0.2367	0.72858	0.016	0.176647
53947	A4GALT	-0.23	-0.701688	0.017	0.180736
83592	AKR1E2	0.2191	0.694638	0.017	0.180736
79998	ANKRD53	-0.2373	-0.715445	0.017	0.180736
10297	APC2	0.2214	0.699264	0.017	0.180736
54828	BCAS3	0.2447	0.742927	0.017	0.180736
113246	C12orf57	-0.2259	-0.693724	0.017	0.180736
56905	C15orf39	0.2206	0.697661	0.017	0.180736
150383	C22orf40	-0.2241	-0.690173	0.017	0.180736
84933	C8orf76	0.2333	0.722281	0.017	0.180736
375748	C9orf102	0.2221	0.70066	0.017	0.180736
1184	CLCN5	0.22	0.696455	0.017	0.180736
11151	CORO1A	-0.2225	-0.686988	0.017	0.180736
122011	CSNK1A1L	0.2086	0.672777	0.017	0.180736
23002	DAAM1	0.2405	0.735477	0.017	0.180736
9077	DIRAS3	-0.2413	-0.722757	0.017	0.180736
2009	EML1	0.221	0.698463	0.017	0.180736
55556	ENOSF1	-0.2383	-0.717288	0.017	0.180736
729830	FAM160A1	0.23567	0.726685	0.017	0.180736
81610	FAM83D	0.2341	0.723774	0.017	0.180736
2717	GLA	-0.2456	-0.73044	0.017	0.180736
51291	GMIP	-0.2223	-0.686588	0.017	0.180736
2813	GP2	-0.2568	-0.74961	0.017	0.180736
122509	IFI27L1	-0.217	-0.675836	0.017	0.180736
10581	IFITM2	-0.2066	-0.653878	0.017	0.180736
10989	IMMT	0.2356	0.726555	0.017	0.180736
9897	KIAA0196	0.222	0.700461	0.017	0.180736
401431	LOC401431	-0.2317	-0.70494	0.017	0.180736
10128	LRPPRC	0.2334	0.722468	0.017	0.180736
255252	LRRC57	0.2158	0.6879	0.017	0.180736
84445	LZTS2	-0.23	-0.701688	0.017	0.180736
84804	MFSD9	0.2169	0.690159	0.017	0.180736
11043	MID2	0.2297	0.715478	0.017	0.180736
10062	NR1H3	-0.231	-0.703605	0.017	0.180736
5058	PAK1	-0.2375	-0.715815	0.017	0.180736
8505	PARG	0.2139	0.683965	0.017	0.180736
11315	PARK7	-0.2318	-0.705131	0.017	0.180736
5195	PEX14	-0.2098	-0.660757	0.017	0.180736
113791	PIK3IP1	-0.245	-0.729378	0.017	0.180736
5450	POU2AF1	-0.2334	-0.708163	0.017	0.180736
9230	RAB11B	-0.2207	-0.683373	0.017	0.180736
10111	RAD50	0.2224	0.701257	0.017	0.180736
57665	RDH14	-0.2192	-0.680335	0.017	0.180736
285855	RPL7L1	0.2222	0.700859	0.017	0.180736
6235	RPS29	-0.2362	-0.713407	0.017	0.180736
6291	SAA4	-0.2317	-0.70494	0.017	0.180736
123096	SLC25A29	-0.2386	-0.717839	0.017	0.180736
57405	SPC25	0.2359	0.727109	0.017	0.180736
6874	TAF4	0.2284	0.712988	0.017	0.180736
219899	TBCEL	0.2301	0.716241	0.017	0.180736
7057	THBS1	0.2321	0.720029	0.017	0.180736
80008	TMEM156	-0.2197	-0.68135	0.017	0.180736
124446	TMEM219	-0.2202	-0.682363	0.017	0.180736
83538	TTC25	-0.2296	-0.700919	0.017	0.180736
7380	UPK3A	-0.235	-0.711169	0.017	0.180736
57478	USP31	0.229	0.714139	0.017	0.180736
400673	VMAC	-0.2266	-0.695096	0.017	0.180736
146177	VWA3A	-0.2299	-0.701496	0.017	0.180736
286101	ZNF252	0.2246	0.705603	0.017	0.180736
57561	ARRDC3	0.2316	0.719086	0.018	0.185677
79572	ATP13A3	0.2145	0.685212	0.018	0.185677
566	AZU1	-0.2477	-0.734126	0.018	0.185677
602	BCL3	-0.2053	-0.651052	0.018	0.185677
631	BFSP1	0.2309	0.717761	0.018	0.185677
63877	C10orf84	-0.2077	-0.656255	0.018	0.185677
60314	C12orf10	-0.2183	-0.678501	0.018	0.185677
810	CALML3	-0.2335	-0.708351	0.018	0.185677
9973	CCS	-0.2152	-0.672118	0.018	0.185677
958	CD40	-0.2186	-0.679113	0.018	0.185677
283106	CSNK2A1P	0.221	0.698463	0.018	0.185677
80319	CXXC4	0.221	0.698463	0.018	0.185677
1632	DCI	-0.217	-0.675836	0.018	0.185677
28955	DEXI	-0.214	-0.66962	0.018	0.185677
8411	EEA1	0.2128	0.681669	0.018	0.185677
201158	FAM18B2	-0.2113	-0.663944	0.018	0.185677
54629	FAM63B	0.2222	0.700859	0.018	0.185677
84248	FYTTD1	0.2292	0.714522	0.018	0.185677
2585	GALK2	0.2388	0.73241	0.018	0.185677
283464	GXYLT1	0.2152	0.686662	0.018	0.185677
3832	KIF11	0.23	0.71605	0.018	0.185677
9493	KIF23	0.233	0.721719	0.018	0.185677
28999	KLF15	-0.2282	-0.698213	0.018	0.185677
54468	MIOS	0.2224	0.701257	0.018	0.185677
64386	MMP25	-0.2208	-0.683575	0.018	0.185677
10199	MPHOSPH10	0.2229	0.702249	0.018	0.185677
65258	MPPE1	-0.241	-0.722214	0.018	0.185677
8202	NCOA3	0.2304	0.716812	0.018	0.185677
10276	NET1	0.226	0.708342	0.018	0.185677
11142	PKIG	-0.2293	-0.700341	0.018	0.185677
10084	PQBP1	-0.2157	-0.673154	0.018	0.185677
5664	PSEN2	-0.2447	-0.728847	0.018	0.185677
391	RHOG	-0.2202	-0.682363	0.018	0.185677
6382	SDC1	0.2334	0.722468	0.018	0.185677
23678	SGK3	-0.2355	-0.712103	0.018	0.185677
203427	SLC25A43	0.218	0.692405	0.018	0.185677
1317	SLC31A1	0.2295	0.715096	0.018	0.185677
401548	SNX30	0.2224	0.701257	0.018	0.185677
9806	SPOCK2	-0.2202	-0.682363	0.018	0.185677
7112	TMPO	0.2132	0.682506	0.018	0.185677
81603	TRIM8	-0.2183	-0.678501	0.018	0.185677
402682	UFSP1	-0.2267	-0.695291	0.018	0.185677
147645	VSIG10L	0.2281	0.71241	0.018	0.185677
7532	YWHAG	0.2381	0.731139	0.018	0.185677
7546	ZIC2	0.2383	0.731502	0.018	0.185677
84225	ZMYND15	-0.2332	-0.707785	0.018	0.185677
284349	ZNF283	0.2201	0.696656	0.018	0.185677
25850	ZNF345	-0.236	-0.713035	0.018	0.185677
54806	AHI1	0.2269	0.710091	0.019	0.190103
80709	AKNA	-0.215	-0.671703	0.019	0.190103
170961	ANKRD24	-0.2428	-0.725457	0.019	0.190103
164668	APOBEC3H	-0.2251	-0.69215	0.019	0.190103
379	ARL4D	-0.2296	-0.700919	0.019	0.190103
25852	ARMC8	0.228	0.712218	0.019	0.190103
23313	C22orf9	-0.212	-0.665423	0.019	0.190103
818	CAMK2G	0.2072	0.669769	0.019	0.190103
9486	CHST10	-0.2197	-0.68135	0.019	0.190103
58190	CTDSP1	-0.2166	-0.675013	0.019	0.190103
10563	CXCL13	-0.2225	-0.686988	0.019	0.190103
85359	DGCR6L	-0.2224	-0.686788	0.019	0.190103
1770	DNAH9	-0.2208	-0.683575	0.019	0.190103
84332	DYDC2	-0.219	-0.679928	0.019	0.190103
2077	ERF	-0.2201	-0.682161	0.019	0.190103
30001	ERO1L	0.2428	0.739579	0.019	0.190103
283742	FAM98B	0.2164	0.689134	0.019	0.190103
91893	FDXACB1	-0.2167	-0.675219	0.019	0.190103
11337	GABARAP	-0.2223	-0.686588	0.019	0.190103
2800	GOLGA1	0.2232	0.702844	0.019	0.190103
2811	GP1BA	-0.236	-0.713035	0.019	0.190103
57211	GPR126	0.2142	0.684589	0.019	0.190103
3106	HLA-B	-0.2202	-0.682363	0.019	0.190103
10379	IRF9	-0.2243	-0.690569	0.019	0.190103
3753	KCNE1	-0.2258	-0.693527	0.019	0.190103
3861	KRT14	-0.2335	-0.708351	0.019	0.190103
3872	KRT17	-0.2224	-0.686788	0.019	0.190103
284441	LOC284441	0.2284	0.712988	0.019	0.190103
84557	MAP1LC3A	-0.2229	-0.687786	0.019	0.190103
23148	NACAD	-0.2225	-0.686988	0.019	0.190103
4818	NKG7	-0.2219	-0.685787	0.019	0.190103
114876	OSBPL1A	-0.2175	-0.676863	0.019	0.190103
5023	P2RX1	-0.231	-0.703605	0.019	0.190103
23244	PDS5A	0.2169	0.690159	0.019	0.190103
11331	PHB2	-0.2232	-0.688384	0.019	0.190103
5283	PIGH	-0.2138	-0.669202	0.019	0.190103
25865	PRKD2	-0.22	-0.681958	0.019	0.190103
5733	PTGER3	-0.208	-0.656901	0.019	0.190103
5983	RFC3	0.2324	0.720593	0.019	0.190103
11237	RNF24	0.2429	0.739756	0.019	0.190103
6230	RPS25	-0.2138	-0.669202	0.019	0.190103
10427	SEC24B	0.2157	0.687694	0.019	0.190103
7355	SLC35A2	0.2212	0.698864	0.019	0.190103
64116	SLC39A8	-0.2139	-0.669411	0.019	0.190103
10454	TAB1	-0.218	-0.677887	0.019	0.190103
23534	TNPO3	0.2193	0.695043	0.019	0.190103
7272	TTK	0.233	0.721719	0.019	0.190103
7392	USF2	-0.2254	-0.692741	0.019	0.190103
54853	WDR55	0.2196	0.695649	0.019	0.190103
339559	ZNF642	-0.2234	-0.688782	0.019	0.190103
8748	ADAM20	-0.2247	-0.69136	0.02	0.195411
10393	ANAPC10	0.2326	0.720969	0.02	0.195411
1822	ATN1	-0.2205	-0.682969	0.02	0.195411
155066	ATP6V0E2	-0.2303	-0.702264	0.02	0.195411
686	BTD	-0.2278	-0.697436	0.02	0.195411
84808	C1orf170	-0.20688	-0.654484	0.02	0.195411
8476	CDC42BPA	0.242	0.738159	0.02	0.195411
125965	COX6B2	-0.2356	-0.71229	0.02	0.195411
100037417	DDTL	-0.231	-0.703605	0.02	0.195411
78986	DUSP26	-0.2333	-0.707974	0.02	0.195411
55268	ECHDC2	-0.2429	-0.725637	0.02	0.195411
1933	EEF1B2	-0.2271	-0.696073	0.02	0.195411
23233	EXOC6B	0.2245	0.705407	0.02	0.195411
51013	EXOSC1	-0.2125	-0.666476	0.02	0.195411
23016	EXOSC7	-0.226	-0.69392	0.02	0.195411
2926	GRSF1	0.2132	0.682506	0.02	0.195411
3115	HLA-DPB1	-0.223	-0.687986	0.02	0.195411
22858	ICK	0.2266	0.709509	0.02	0.195411
219541	MED19	-0.2134	-0.668365	0.02	0.195411
4744	NEFH	-0.2413	-0.722757	0.02	0.195411
5441	POLR2L	-0.2101	-0.661396	0.02	0.195411
260434	PYDC1	-0.2531	-0.74341	0.02	0.195411
5898	RALA	0.2325	0.720781	0.02	0.195411
9771	RAPGEF5	0.2153	0.686868	0.02	0.195411
79641	ROGDI	-0.2196	-0.681147	0.02	0.195411
222901	RPL23P8	-0.2293	-0.700341	0.02	0.195411
3921	RPSA	-0.231	-0.703605	0.02	0.195411
55291	SAPS3	0.2293	0.714714	0.02	0.195411
90507	SCRN2	-0.2296	-0.700919	0.02	0.195411
256987	SERINC5	0.221	0.698463	0.02	0.195411
10165	SLC25A13	0.2185	0.693422	0.02	0.195411
51012	SLMO2	0.2177	0.691794	0.02	0.195411
132851	SPATA4	-0.2426	-0.725098	0.02	0.195411
57731	SPTBN4	-0.2353	-0.71173	0.02	0.195411
339488	TFAP2E	-0.2117	-0.664789	0.02	0.195411
7076	TIMP1	-0.2195	-0.680944	0.02	0.195411
7082	TJP1	0.2249	0.706192	0.02	0.195411
7267	TTC3	0.225	0.706388	0.02	0.195411
56995	TULP4	0.2309	0.717761	0.02	0.195411
8427	ZNF282	-0.2306	-0.702839	0.02	0.195411
386724	AMIGO3	-0.212	-0.665423	0.021	0.199332
26229	B3GAT3	-0.226	-0.69392	0.021	0.199332
374467	C12orf63	-0.2338	-0.708917	0.021	0.199332
55322	C5orf22	0.2152	0.686662	0.021	0.199332
442213	C6orf138	0.2181	0.692609	0.021	0.199332
65265	C8orf33	0.2211	0.698664	0.021	0.199332
919	CD247	-0.2225	-0.686988	0.021	0.199332
974	CD79B	-0.217	-0.675836	0.021	0.199332
79094	CHAC1	0.2109	0.677671	0.021	0.199332
85443	DCLK3	0.2201	0.696656	0.021	0.199332
9700	ESPL1	0.2159	0.688106	0.021	0.199332
25929	GEMIN5	0.2073	0.669985	0.021	0.199332
23426	GRIP1	0.2292	0.714522	0.021	0.199332
3136	HLA-H	-0.2108	-0.662884	0.021	0.199332
3384	ICAM2	-0.2146	-0.670871	0.021	0.199332
347252	IGFBPL1	-0.2527	-0.742732	0.021	0.199332
253558	LCLAT1	0.216	0.688311	0.021	0.199332
57128	LYRM4	-0.222	-0.685987	0.021	0.199332
56917	MEIS3	-0.2176	-0.677068	0.021	0.199332
64780	MICAL1	-0.2088	-0.658619	0.021	0.199332
64005	MYO1G	-0.2059	-0.652358	0.021	0.199332
90634	N4BP2L1	-0.2241	-0.690173	0.021	0.199332
100188953	NCRNA00092	-0.227	-0.695878	0.021	0.199332
205251	NCRNA00116	-0.2168	-0.675425	0.021	0.199332
9480	ONECUT2	0.234	0.723588	0.021	0.199332
56097	PCDHGC5	0.2169	0.690159	0.021	0.199332
25796	PGLS	-0.22238	-0.686748	0.021	0.199332
5257	PHKB	0.2099	0.675551	0.021	0.199332
255783	PRR24	-0.2142	-0.670037	0.021	0.199332
138428	PTRH1	-0.2235	-0.688981	0.021	0.199332
79037	PVRIG	-0.2297	-0.701111	0.021	0.199332
11236	RNF139	0.2253	0.706975	0.021	0.199332
60485	SAV1	-0.2321	-0.705701	0.021	0.199332
4068	SH2D1A	-0.2199	-0.681756	0.021	0.199332
5002	SLC22A18	-0.2291	-0.699955	0.021	0.199332
23657	SLC7A11	0.2152	0.686662	0.021	0.199332
10963	STIP1	0.2487	0.749855	0.021	0.199332
8417	STX7	0.2327	0.721157	0.021	0.199332
150483	TEKT4	-0.221	-0.683978	0.021	0.199332
400629	TEX19	0.2225	0.701456	0.021	0.199332
80757	TMEM121	-0.2236	-0.68918	0.021	0.199332
28959	TMEM176B	-0.21	-0.661183	0.021	0.199332
641649	TMEM91	-0.2177	-0.677273	0.021	0.199332
64852	TUT1	-0.2128	-0.667107	0.021	0.199332
117581	TWIST2	-0.229	-0.699762	0.021	0.199332
7454	WAS	-0.2172	-0.676247	0.021	0.199332
10009	ZBTB33	0.2196	0.695649	0.021	0.199332
23036	ZNF292	0.2257	0.707757	0.021	0.199332
654254	ZNF732	0.218	0.692405	0.021	0.199332
729747	ZNF878	0.231	0.717951	0.021	0.199332
8225	?	-0.2227	-0.687387	0.022	0.202364
1	A1BG	-0.2378	-0.716368	0.022	0.202364
254268	AKNAD1	0.2188	0.694031	0.022	0.202364
381	ARF5	-0.2176	-0.677068	0.022	0.202364
684	BST2	-0.2147	-0.671079	0.022	0.202364
694	BTG1	-0.2176	-0.677068	0.022	0.202364
55320	C14orf106	0.2189	0.694233	0.022	0.202364
23587	C17orf81	-0.2204	-0.682767	0.022	0.202364
126731	C1orf96	0.2054	0.665869	0.022	0.202364
285636	C5orf51	0.2167	0.689749	0.022	0.202364
126075	CCDC159	-0.2397	-0.719851	0.022	0.202364
898	CCNE1	0.2237	0.703832	0.022	0.202364
951	CD37	-0.217	-0.675836	0.022	0.202364
10321	CRISP3	0.2156	0.687487	0.022	0.202364
1763	DNA2	0.2117	0.679359	0.022	0.202364
401145	FAM190A	0.2202	0.696858	0.022	0.202364
116228	FAM36A	-0.2179	-0.677683	0.022	0.202364
152877	FAM53A	-0.2221	-0.686187	0.022	0.202364
2188	FANCF	-0.2054	-0.65127	0.022	0.202364
51303	FKBP11	-0.2035	-0.647109	0.022	0.202364
2356	FPGS	-0.2128	-0.667107	0.022	0.202364
53822	FXYD7	-0.2372	-0.71526	0.022	0.202364
132158	GLYCTK	-0.2268	-0.695487	0.022	0.202364
79158	GNPTAB	0.2197	0.69585	0.022	0.202364
84278	HIATL2	0.231	0.717951	0.022	0.202364
10075	HUWE1	0.2155	0.687281	0.022	0.202364
134353	LSM11	0.2168	0.689954	0.022	0.202364
51360	MBTPS2	0.2122	0.680411	0.022	0.202364
100271849	MEF2B	-0.2165	-0.674807	0.022	0.202364
4734	NEDD4	0.2279	0.712025	0.022	0.202364
4915	NTRK2	-0.2195	-0.680944	0.022	0.202364
4916	NTRK3	-0.2307	-0.703031	0.022	0.202364
28962	OSTM1	0.2319	0.719652	0.022	0.202364
375189	PFN4	-0.2174	-0.676658	0.022	0.202364
114770	PGLYRP2	-0.2191	-0.680132	0.022	0.202364
9796	PHYHIP	-0.2404	-0.721125	0.022	0.202364
23129	PLXND1	0.2175	0.691386	0.022	0.202364
55629	PNRC2	-0.1989	-0.636873	0.022	0.202364
56980	PRDM10	0.2188	0.694031	0.022	0.202364
23475	QPRT	0.2381	0.731139	0.022	0.202364
5872	RAB13	-0.2158	-0.673361	0.022	0.202364
389	RHOC	-0.2116	-0.664578	0.022	0.202364
56254	RNF20	0.2259	0.708147	0.022	0.202364
11224	RPL35	-0.2164	-0.674601	0.022	0.202364
152579	SCFD2	0.2262	0.708731	0.022	0.202364
257218	SHPRH	0.2148	0.685834	0.022	0.202364
81034	SLC25A32	0.2211	0.698664	0.022	0.202364
7782	SLC30A4	0.2133	0.682714	0.022	0.202364
6801	STRN	0.2173	0.690978	0.022	0.202364
23023	TMCC1	0.2224	0.701257	0.022	0.202364
23505	TMEM131	0.2202	0.696858	0.022	0.202364
51534	VTA1	0.2274	0.711059	0.022	0.202364
7709	ZBTB17	-0.2184	-0.678705	0.022	0.202364
374655	ZNF710	0.2087	0.672991	0.022	0.202364
388567	ZNF749	0.2128	0.681669	0.022	0.202364
197320	ZNF778	0.218	0.692405	0.022	0.202364
176	ACAN	0.2233	0.703041	0.023	0.205764
23431	AP4E1	0.2086	0.672777	0.023	0.205764
410	ARSA	-0.214	-0.66962	0.023	0.205764
84126	ATRIP	-0.224	-0.689974	0.023	0.205764
554	AVPR2	-0.2374	-0.71563	0.023	0.205764
10458	BAIAP2	-0.224	-0.689974	0.023	0.205764
23299	BICD2	0.2058	0.666739	0.023	0.205764
56946	C11orf30	0.2307	0.717382	0.023	0.205764
9605	C16orf7	-0.2187	-0.679317	0.023	0.205764
55345	C4orf21	0.2043	0.663468	0.023	0.205764
283234	CCDC88B	-0.2179	-0.677683	0.023	0.205764
9276	COPB2	0.2327	0.721157	0.023	0.205764
57834	CYP4F11	-0.2236	-0.68918	0.023	0.205764
25879	DCAF13	0.2358	0.726924	0.023	0.205764
55308	DDX19A	0.202	0.658402	0.023	0.205764
285489	DOK7	-0.2163	-0.674394	0.023	0.205764
29952	DPP7	-0.219	-0.679928	0.023	0.205764
161582	DYX1C1	-0.204	-0.648207	0.023	0.205764
55215	FANCI	0.2178	0.691998	0.023	0.205764
80028	FBXL18	0.2162	0.688723	0.023	0.205764
2687	GGT5	-0.2283	-0.698407	0.023	0.205764
124790	HEXIM2	-0.2178	-0.677478	0.023	0.205764
10855	HPSE	0.2059	0.666956	0.023	0.205764
3615	IMPDH2	-0.2347	-0.710607	0.023	0.205764
57214	KIAA1199	0.2293	0.714714	0.023	0.205764
22998	LIMCH1	0.2251	0.706584	0.023	0.205764
728606	LOC728606	-0.2269	-0.695682	0.023	0.205764
26018	LRIG1	-0.2291	-0.699955	0.023	0.205764
51586	MED15	-0.2062	-0.65301	0.023	0.205764
4665	NAB2	-0.2164	-0.674601	0.023	0.205764
25832	NBPF14	0.2169	0.690159	0.023	0.205764
152110	NEK10	-0.231	-0.703605	0.023	0.205764
25983	NGDN	-0.2233	-0.688583	0.023	0.205764
4814	NINJ1	-0.2092	-0.659475	0.023	0.205764
54830	NUP62CL	0.229	0.714139	0.023	0.205764
10178	ODZ1	-0.2217	-0.685385	0.023	0.205764
143503	OR51E1	0.2325	0.720781	0.023	0.205764
56288	PARD3	0.2132	0.682506	0.023	0.205764
23532	PRAME	0.2172	0.690773	0.023	0.205764
84109	QRFPR	-0.2411	-0.722395	0.023	0.205764
9693	RAPGEF2	0.2162	0.688723	0.023	0.205764
5970	RELA	-0.2047	-0.649741	0.023	0.205764
79751	SLC25A22	-0.2157	-0.673154	0.023	0.205764
342667	STAC2	-0.208	-0.656901	0.023	0.205764
136306	SVOPL	-0.224	-0.689974	0.023	0.205764
10388	SYCP2	0.2049	0.664779	0.023	0.205764
7031	TFF1	-0.2298	-0.701304	0.023	0.205764
7177	TPSAB1	-0.225	-0.691952	0.023	0.205764
81628	TSC22D4	-0.2231	-0.688185	0.023	0.205764
80700	UBXN6	-0.217	-0.675836	0.023	0.205764
203523	ZNF449	0.2097	0.675125	0.023	0.205764
27350	APOBEC3C	-0.2081	-0.657116	0.024	0.208004
84419	C15orf48	-0.213	-0.667527	0.024	0.208004
114926	C8orf40	-0.2125	-0.666476	0.024	0.208004
8912	CACNA1H	0.218	0.692405	0.024	0.208004
57863	CADM3	-0.2353	-0.71173	0.024	0.208004
8573	CASK	0.206	0.667173	0.024	0.208004
56267	CCBL2	-0.2049	-0.650178	0.024	0.208004
890	CCNA2	0.2233	0.703041	0.024	0.208004
899	CCNF	0.2321	0.720029	0.024	0.208004
962	CD48	-0.2103	-0.661822	0.024	0.208004
1017	CDK2	0.235	0.725446	0.024	0.208004
51286	CEND1	-0.2048	-0.64996	0.024	0.208004
64105	CENPK	0.1975	0.648317	0.024	0.208004
25999	CLIP3	-0.2281	-0.698019	0.024	0.208004
1308	COL17A1	-0.2204	-0.682767	0.024	0.208004
8450	CUL4B	0.221	0.698463	0.024	0.208004
84062	DTNBP1	-0.2287	-0.699182	0.024	0.208004
2059	EPS8	0.2091	0.673846	0.024	0.208004
121506	ERP27	-0.2232	-0.688384	0.024	0.208004
2117	ETV3	0.2216	0.699663	0.024	0.208004
23404	EXOSC2	0.206	0.667173	0.024	0.208004
199786	FAM129C	-0.2229	-0.687786	0.024	0.208004
2187	FANCB	0.2117	0.679359	0.024	0.208004
2242	FES	-0.2277	-0.697242	0.024	0.208004
63940	GPSM3	-0.2085	-0.657975	0.024	0.208004
51409	HEMK1	-0.244	-0.727602	0.024	0.208004
3454	IFNAR1	0.224	0.704423	0.024	0.208004
3593	IL12B	-0.2265	-0.6949	0.024	0.208004
3672	ITGA1	0.2168	0.689954	0.024	0.208004
113730	KLHDC7B	-0.1964	-0.631215	0.024	0.208004
3816	KLK1	-0.2325	-0.70646	0.024	0.208004
3866	KRT15	-0.193	-0.623409	0.024	0.208004
441089	LOC441089	0.2177	0.691794	0.024	0.208004
96610	LOC96610	-0.2169	-0.675631	0.024	0.208004
136332	LRGUK	-0.2203	-0.682565	0.024	0.208004
55796	MBNL3	0.2118	0.67957	0.024	0.208004
339175	METTL2A	0.2163	0.688928	0.024	0.208004
8190	MIA	-0.2251	-0.69215	0.024	0.208004
10934	MORF4	0.20596	0.667087	0.024	0.208004
79661	NEIL1	-0.2271	-0.696073	0.024	0.208004
4795	NFKBIL1	-0.218	-0.677887	0.024	0.208004
25836	NIPBL	0.218	0.692405	0.024	0.208004
5049	PAFAH1B2	0.2234	0.703239	0.024	0.208004
9409	PEX16	-0.2142	-0.670037	0.024	0.208004
10857	PGRMC1	0.2118	0.67957	0.024	0.208004
29085	PHPT1	-0.2146	-0.670871	0.024	0.208004
81890	QTRT1	-0.2202	-0.682363	0.024	0.208004
57403	RAB22A	0.23	0.71605	0.024	0.208004
26046	RNF160	0.2018	0.657959	0.024	0.208004
9136	RRP9	-0.2231	-0.688185	0.024	0.208004
81848	SPRY4	0.2227	0.701853	0.024	0.208004
11171	STRAP	0.2198	0.696052	0.024	0.208004
7037	TFRC	0.224	0.704423	0.024	0.208004
943	TNFRSF8	-0.21	-0.661183	0.024	0.208004
50852	TRAT1	-0.2158	-0.673361	0.024	0.208004
27229	TUBGCP4	0.2101	0.675976	0.024	0.208004
65109	UPF3B	0.203	0.660612	0.024	0.208004
84640	USP38	0.2132	0.682506	0.024	0.208004
7705	ZNF146	0.2184	0.693219	0.024	0.208004
221785	ZNF498	-0.2306	-0.702839	0.024	0.208004
270	AMPD1	-0.248	-0.734649	0.025	0.210534
196527	ANO6	0.2205	0.697461	0.025	0.210534
330	BIRC3	-0.205	-0.650397	0.025	0.210534
80217	C10orf79	-0.225	-0.691952	0.025	0.210534
64776	C11orf1	-0.1976	-0.633939	0.025	0.210534
84418	C5orf32	-0.203	-0.646007	0.025	0.210534
55064	C9orf68	-0.2282	-0.698213	0.025	0.210534
813	CALU	0.2224	0.701257	0.025	0.210534
29775	CARD10	-0.2166	-0.675013	0.025	0.210534
959	CD40LG	-0.2123	-0.666055	0.025	0.210534
55664	CDC37L1	-0.2146	-0.670871	0.025	0.210534
79598	CEP97	0.2034	0.661493	0.025	0.210534
1118	CHIT1	-0.2187	-0.679317	0.025	0.210534
4435	CITED1	-0.2359	-0.712849	0.025	0.210534
124817	CNTD1	-0.2191	-0.680132	0.025	0.210534
64506	CPEB1	0.2065	0.668257	0.025	0.210534
404217	CTXN1	-0.2325	-0.70646	0.025	0.210534
79004	CUEDC2	-0.2272	-0.696268	0.025	0.210534
9267	CYTH1	-0.2166	-0.675013	0.025	0.210534
9451	EIF2AK3	0.2227	0.701853	0.025	0.210534
2217	FCGRT	-0.224	-0.689974	0.025	0.210534
2529	FUT7	-0.2009	-0.641352	0.025	0.210534
64395	GMCL1	0.20161	0.657537	0.025	0.210534
8971	H1FX	-0.213	-0.667527	0.025	0.210534
94239	H2AFV	0.2171	0.690569	0.025	0.210534
729920	ISPD	0.2135	0.683132	0.025	0.210534
55818	KDM3A	0.2402	0.734938	0.025	0.210534
286467	LOC286467	0.2122	0.680411	0.025	0.210534
4066	LYL1	-0.2252	-0.692347	0.025	0.210534
84815	MGC12916	-0.2139	-0.669411	0.025	0.210534
4316	MMP7	-0.2063	-0.653227	0.025	0.210534
4358	MPV17	-0.2031	-0.646228	0.025	0.210534
9242	MSC	-0.2185	-0.678909	0.025	0.210534
4534	MTM1	0.217	0.690364	0.025	0.210534
80022	MYO15B	-0.2294	-0.700533	0.025	0.210534
8883	NAE1	0.215	0.686248	0.025	0.210534
79707	NOL9	0.2051	0.665216	0.025	0.210534
4901	NRL	-0.2109	-0.663096	0.025	0.210534
80228	ORAI2	-0.2106	-0.662459	0.025	0.210534
8641	PCDHGB4	0.2161	0.688517	0.025	0.210534
56101	PCDHGB5	0.2194	0.695245	0.025	0.210534
5178	PEG3	0.2085	0.672563	0.025	0.210534
23761	PISD	-0.2148	-0.671287	0.025	0.210534
9055	PRC1	0.2213	0.699064	0.025	0.210534
5551	PRF1	-0.21	-0.661183	0.025	0.210534
8000	PSCA	0.2115	0.678938	0.025	0.210534
55278	QRSL1	0.2141	0.684381	0.025	0.210534
112483	SAT2	-0.2159	-0.673568	0.025	0.210534
27240	SIT1	-0.2115	-0.664367	0.025	0.210534
170463	SSBP4	-0.2244	-0.690767	0.025	0.210534
6919	TCEA2	-0.211	-0.663308	0.025	0.210534
64499	TPSB2	-0.219	-0.679928	0.025	0.210534
199223	TTC21A	-0.2351	-0.711356	0.025	0.210534
11344	TWF2	-0.2149	-0.671495	0.025	0.210534
7481	WNT11	-0.2141	-0.669829	0.025	0.210534
55565	ZNF821	-0.2081	-0.657116	0.025	0.210534
26154	ABCA12	0.219	0.694436	0.026	0.213344
130340	AP1S3	0.2084	0.672349	0.026	0.213344
84364	ARFGAP2	-0.2071	-0.65496	0.026	0.213344
90381	C15orf42	0.2212	0.698864	0.026	0.213344
90835	C16orf93	-0.2309	-0.703414	0.026	0.213344
91304	C19orf6	-0.2204	-0.682767	0.026	0.213344
9994	CASP8AP2	0.2126	0.68125	0.026	0.213344
441549	CDNF	-0.2047	-0.649741	0.026	0.213344
1111	CHEK1	0.2413	0.73691	0.026	0.213344
1147	CHUK	0.1956	0.643989	0.026	0.213344
113540	CMTM1	0.2176	0.69159	0.026	0.213344
160851	DGKH	0.2155	0.687281	0.026	0.213344
25778	DSTYK	0.206	0.667173	0.026	0.213344
23301	EHBP1	0.2117	0.679359	0.026	0.213344
728833	FAM72D	0.2052	0.665434	0.026	0.213344
24147	FJX1	-0.2182	-0.678296	0.026	0.213344
2841	GPR18	-0.2235	-0.688981	0.026	0.213344
389524	GTF2IRD2B	-0.2227	-0.687387	0.026	0.213344
79441	HAUS3	0.1996	0.653052	0.026	0.213344
3134	HLA-F	-0.1948	-0.627557	0.026	0.213344
3290	HSD11B1	-0.2262	-0.694312	0.026	0.213344
3621	ING1	-0.1943	-0.626409	0.026	0.213344
[truncated: 14,650 more rows]

## Sheet: CESC
Entrez ID	Gene Name	Raw Cox Coefficient	Sigmoidal Normalized Cox Coefficient	Raw Cox P-Value	BH Adjusted P-Value	Model: coxph(Surv(times,died) ~ gene + grade1 + grade2 + grade3 + grade4 + age
11082	ESM1	0.757	0.963174	2.5e-06	0.0113019
3678	ITGA5	0.6236	0.927152	2.8e-06	0.0113019
4017	LOXL2	0.6731	0.943358	3.2e-06	0.0113019
352954	GATS	-0.58099	-0.924047	4.2e-06	0.0113019
9582	APOBEC3B	-0.656	-0.949303	4.3e-06	0.0113019
81848	SPRY4	0.6683	0.941954	5.8e-06	0.0113019
9441	MED26	-0.6749	-0.954247	6.1e-06	0.0113019
100272147	MTCP1NB	-0.656	-0.949303	6.6e-06	0.0113019
64778	FNDC3B	0.728	0.957244	6.8e-06	0.0113019
51228	GLTP	-0.6138	-0.936315	7.6e-06	0.0113019
3751	KCND2	0.567	0.903153	7.6e-06	0.0113019
375033	PEAR1	0.595	0.915841	1e-05	0.0128527
4179	CD46	0.65274	0.937166	1.1e-05	0.0128527
10422	UBAC1	-0.63465	-0.943091	1.1e-05	0.0128527
81792	ADAMTS12	0.5914	0.914303	1.4e-05	0.0136317
285	ANGPT2	0.6832	0.946206	1.4e-05	0.0136317
348013	FAM70B	0.5842	0.911147	1.5e-05	0.0136317
7837	PXDN	0.6557	0.938105	1.5e-05	0.0136317
29781	NCAPH2	-0.577	-0.922409	2e-05	0.0171015
146547	PRSS36	-0.6128	-0.935972	2.1e-05	0.0171015
60681	FKBP10	0.6455	0.93481	2.3e-05	0.0171015
5798	PTPRN	0.5802	0.909346	2.3e-05	0.0171015
26150	RIBC2	-0.56657	-0.917964	2.5e-05	0.0177804
1284	COL4A2	0.6881	0.947537	2.7e-05	0.0184027
1282	COL4A1	0.6646	0.940848	3.1e-05	0.0193873
5787	PTPRB	0.5979	0.917061	3.1e-05	0.0193873
54567	DLL4	0.6495	0.936122	3.2e-05	0.0193873
10130	PDIA6	0.5727	0.905875	3.4e-05	0.0196296
79019	CENPM	-0.5728	-0.920647	3.5e-05	0.0196296
11328	FKBP9	0.5512	0.895212	3.6e-05	0.0196296
11277	TREX1	-0.5768	-0.922326	4.2e-05	0.0221625
22862	FNDC3A	0.5561	0.897739	4.7e-05	0.0229012
56937	PMEPA1	0.5573	0.898348	4.7e-05	0.0229012
158801	CXorf42	-0.5308	-0.900798	4.8e-05	0.0229012
84629	TNRC18	0.5551	0.897228	4.9e-05	0.0229012
10444	ZER1	-0.578	-0.922823	5.5e-05	0.0243273
401237	FLJ22536	0.5775	0.908111	5.6e-05	0.0243273
47	ACLY	0.5126	0.873154	5.7e-05	0.0243273
256126	SYCE2	-0.56419	-0.916916	5.8e-05	0.0243273
8974	P4HA2	0.538	0.88811	6.1e-05	0.0247272
5033	P4HA1	0.49295	0.860326	6.2e-05	0.0247272
9818	NUPL1	0.5675	0.903395	6.5e-05	0.0247272
56904	SH3GLB2	-0.53245	-0.901659	6.5e-05	0.0247272
10371	SEMA3A	0.5695	0.904356	7.5e-05	0.0257953
4982	TNFRSF11B	0.5353	0.886603	7.5e-05	0.0257953
91966	CXorf40A	-0.5205	-0.895254	7.6e-05	0.0257953
645432	ARRDC5	-0.5674	-0.918326	7.7e-05	0.0257953
55840	EAF2	-0.5711	-0.919923	7.8e-05	0.0257953
2335	FN1	0.6066	0.920618	7.9e-05	0.0257953
83930	STARD3NL	0.5237	0.879906	8e-05	0.0257953
5782	PTPN12	0.5484	0.893742	8.1e-05	0.0257953
144715	RAD9B	-0.5526	-0.911627	8.2e-05	0.0257953
115650	TNFRSF13C	-0.5615	-0.915716	8.4e-05	0.0259259
5069	PAPPA	0.5737	0.906345	8.6e-05	0.0260516
1620	DBC1	0.5754	0.907139	9.8e-05	0.0277254
150365	MEI1	-0.5296	-0.900166	9.8e-05	0.0277254
10973	ASCC3	0.5659	0.902619	0.0001	0.0277254
8829	NRP1	0.5268	0.881731	0.0001	0.0277254
55652	SLC48A1	-0.5213	-0.895695	0.0001	0.0277254
25825	BACE2	0.5288	0.882895	0.00011	0.029498
8270	LAGE3	-0.5624	-0.916119	0.00011	0.029498
118932	ANKRD22	-0.539	-0.905011	0.00012	0.0299513
81533	ITFG1	0.5491	0.894111	0.00012	0.0299513
83941	TM2D1	0.5341	0.885926	0.00012	0.0299513
7130	TNFAIP6	0.4969	0.862997	0.00012	0.0299513
54583	EGLN1	0.51607	0.875302	0.00013	0.0299513
199786	FAM129C	-0.5177	-0.893697	0.00013	0.0299513
164312	LRRN4	0.5745	0.90672	0.00013	0.0299513
80714	PBX4	-0.4556	-0.853054	0.00013	0.0299513
5445	PON2	0.5579	0.898652	0.00013	0.0299513
6781	STC1	0.4991	0.864465	0.00013	0.0299513
5352	PLOD2	0.5011	0.865786	0.00014	0.0313715
51616	TAF9B	-0.5067	-0.887366	0.00014	0.0313715
80114	BICC1	0.552	0.895629	0.00015	0.0318662
3482	IGF2R	0.5332	0.885417	0.00015	0.0318662
23479	ISCU	-0.471	-0.8643	0.00015	0.0318662
3690	ITGB3	0.524	0.880084	0.00015	0.0318662
1024	CDK8	0.55	0.894584	0.00016	0.031918
3576	IL8	0.561	0.900207	0.00016	0.031918
54741	LEPROT	0.5432	0.89096	0.00016	0.031918
9020	MAP3K14	-0.5205	-0.895254	0.00016	0.031918
23648	SSBP3	-0.5017	-0.884373	0.00016	0.031918
23080	AVL9	0.5191	0.87715	0.00017	0.0323356
2321	FLT1	0.5634	0.901396	0.00017	0.0323356
170384	FUT11	0.4681	0.842386	0.00017	0.0323356
23528	ZNF281	0.539	0.888664	0.00017	0.0323356
6363	CCL19	-0.5041	-0.885819	0.00018	0.0330836
100133036	FAM95B1	-0.5549	-0.912701	0.00018	0.0330836
80020	FOXRED2	-0.4657	-0.860523	0.00018	0.0330836
55723	ASF1B	-0.5328	-0.901841	0.00019	0.0337828
79992	C6orf59	0.5315	0.884449	0.00019	0.0337828
5236	PGM1	0.5174	0.876116	0.00019	0.0337828
4148	MATN3	0.48	0.851226	0.0002	0.0351785
92689	FAM114A1	0.52836	0.88264	0.00021	0.0361598
64838	FNDC4	0.522	0.878894	0.00021	0.0361598
128989	C22orf25	-0.5223	-0.896243	0.00023	0.0380034
51343	FZR1	-0.4933	-0.879176	0.00023	0.0380034
169355	IDO2	-0.4971	-0.881554	0.00023	0.0380034
89780	WNT3A	-0.5172	-0.893417	0.00023	0.0380034
4162	MCAM	0.5127	0.873216	0.00024	0.0381157
6581	SLC22A3	0.5578	0.898601	0.00024	0.0381157
9016	SLC25A14	-0.4814	-0.871438	0.00024	0.0381157
6770	STAR	-0.5235	-0.896898	0.00024	0.0381157
66002	CYP4F12	-0.5209	-0.895474	0.00025	0.0393221
79624	C6orf211	0.49	0.858299	0.00026	0.0405055
11167	FSTL1	0.5448	0.891824	0.00027	0.040895
6374	CXCL5	0.5397	0.88905	0.00028	0.040895
283208	P4HA3	0.5356	0.886771	0.00028	0.040895
5351	PLOD1	0.5221	0.878954	0.00028	0.040895
871	SERPINH1	0.55	0.894584	0.00028	0.040895
123096	SLC25A29	-0.5292	-0.899955	0.00028	0.040895
29988	SLC2A8	-0.4586	-0.85531	0.00028	0.040895
55033	FKBP14	0.5299	0.88353	0.00029	0.0416125
57515	SERINC1	0.4957	0.862191	0.00029	0.0416125
3672	ITGA1	0.526	0.881263	0.0003	0.042673
5164	PDK2	-0.4969	-0.88143	0.00031	0.0433417
25945	PVRL3	0.4851	0.854873	0.00031	0.0433417
3624	INHBA	0.4515	0.829253	0.00032	0.0437931
253827	MSRB3	0.5232	0.87961	0.00032	0.0437931
1349	COX7B	-0.5073	-0.887721	0.00033	0.0437931
4311	MME	0.5103	0.871711	0.00033	0.0437931
100129424	RPL19P12	-0.4749	-0.867019	0.00033	0.0437931
8754	ADAM9	0.469	0.843071	0.00034	0.0437931
393	ARHGAP4	-0.4793	-0.870026	0.00034	0.0437931
622	BDH1	-0.4698	-0.863453	0.00034	0.0437931
414152	C10orf105	-0.482	-0.871839	0.00034	0.0437931
4811	NID1	0.4857	0.855296	0.00034	0.0437931
25998	IBTK	0.4964	0.862662	0.00035	0.0447289
4312	MMP1	0.473	0.846083	0.00036	0.0452991
8115	TCL1A	-0.51355	-0.891349	0.00036	0.0452991
85359	DGCR6L	-0.4785	-0.869484	0.00037	0.045852
222068	TMED4	0.5022	0.866507	0.00037	0.045852
923	CD6	-0.4465	-0.846011	0.00038	0.0467371
171423	PDIA3P	0.4987	0.864199	0.00039	0.0472564
164118	TTC24	-0.4851	-0.873892	0.00039	0.0472564
25902	MTHFD1L	0.5415	0.890036	0.0004	0.0481118
79603	LASS4	-0.4508	-0.849377	0.00041	0.0483828
51390	AIG1	0.5121	0.872841	0.00042	0.0483828
26524	LATS2	0.5207	0.878115	0.00042	0.0483828
4314	MMP3	0.4925	0.860018	0.00042	0.0483828
6711	SPTBN1	0.474	0.846827	0.00042	0.0483828
203547	VMA21	-0.4463	-0.845853	0.00042	0.0483828
10535	RNASEH2A	-0.4834	-0.87277	0.00043	0.0491884
112869	CCDC101	-0.4954	-0.880495	0.00044	0.0492981
3835	KIF22	-0.4439	-0.843943	0.00044	0.0492981
5104	SERPINA5	0.4886	0.857328	0.00044	0.0492981
57126	CD177	-0.5298	-0.900272	0.00046	0.0505807
55065	GPR172B	-0.4612	-0.85724	0.00046	0.0505807
83746	L3MBTL2	-0.4502	-0.848911	0.00047	0.0505807
23209	MLC1	-0.501	-0.883948	0.00047	0.0505807
134429	STARD4	0.4234	0.804748	0.00047	0.0505807
23091	ZC3H13	0.4596	0.835781	0.00047	0.0505807
79159	NOL12	-0.4619	-0.857755	0.00048	0.050986
388	RHOB	0.4862	0.855649	0.00048	0.050986
3309	HSPA5	0.4966	0.862796	0.00049	0.0513809
79085	SLC25A23	-0.4861	-0.874548	0.00049	0.0513809
5797	PTPRM	0.5159	0.875197	0.0005	0.0518173
444	ASPH	0.467	0.841545	0.00051	0.0518173
1069	CETN2	-0.5054	-0.886595	0.00051	0.0518173
1755	DMBT1	0.4682	0.842463	0.00051	0.0518173
1829	DSG2	0.455	0.832102	0.00051	0.0518173
89766	UMODL1	-0.537	-0.903999	0.00052	0.0522682
1236	CCR7	-0.4394	-0.840303	0.00053	0.0522682
3688	ITGB1	0.5107	0.871963	0.00053	0.0522682
116150	NUS1	0.4351	0.815311	0.00053	0.0522682
596	BCL2	-0.4577	-0.854637	0.00054	0.0522682
8214	DGCR6	-0.4756	-0.867502	0.00054	0.0522682
3792	KEL	-0.5007	-0.883766	0.00054	0.0522682
7422	VEGFA	0.51078	0.872013	0.00054	0.0522682
2590	GALNT2	0.4692	0.843223	0.00055	0.0526135
10631	POSTN	0.4716	0.845035	0.00055	0.0526135
10036	CHAF1A	-0.4823	-0.872039	0.00056	0.0526783
2069	EREG	0.4839	0.854022	0.00056	0.0526783
11096	ADAMTS5	0.5169	0.875811	0.00057	0.0526783
2051	EPHB6	-0.4389	-0.839893	0.00057	0.0526783
84954	MPND	-0.4451	-0.8449	0.00057	0.0526783
8641	PCDHGB4	0.446	0.824687	0.00057	0.0526783
57407	NMRAL1	-0.4781	-0.869212	0.00058	0.0527957
10111	RAD50	0.4739	0.846753	0.00058	0.0527957
126382	NR2C2AP	-0.4572	-0.854261	0.00059	0.0527957
10955	SERINC3	0.4533	0.830724	0.00059	0.0527957
163590	TOR1AIP2	0.4569	0.833631	0.00059	0.0527957
22926	ATF6	0.501	0.86572	0.0006	0.0527957
25782	RAB3GAP2	0.5024	0.866638	0.0006	0.0527957
144195	SLC2A14	0.477	0.849041	0.0006	0.0527957
285761	DCBLD1	0.4324	0.81292	0.00061	0.0527957
2028	ENPEP	0.5021	0.866442	0.00061	0.0527957
23547	LILRA4	-0.4552	-0.852751	0.00061	0.0527957
11184	MAP4K1	-0.4516	-0.849996	0.00061	0.0527957
57574	2015-03-04	0.4898	0.858161	0.00063	0.0542397
83468	GLT8D2	0.462	0.837671	0.00065	0.0550917
654346	LGALS9C	-0.4772	-0.868599	0.00065	0.0550917
84910	TMEM87B	0.45308	0.830544	0.00065	0.0550917
4174	MCM5	-0.4553	-0.852827	0.00066	0.0553655
79037	PVRIG	-0.455	-0.852599	0.00066	0.0553655
199675	C19orf59	0.5135	0.873714	0.00067	0.0556172
112464	PRKCDBP	0.4919	0.859607	0.00067	0.0556172
84971	ATG4D	-0.4636	-0.858999	0.00068	0.0556172
440278	CATSPER2P1	0.4876	0.85663	0.00068	0.0556172
913	CD1E	-0.5037	-0.885579	0.00068	0.0556172
84895	FAM73B	-0.4401	-0.840874	0.00071	0.0572127
4337	MOCS1	0.4689	0.842995	0.00071	0.0572127
6464	SHC1	0.4896	0.858022	0.00071	0.0572127
8777	MPDZ	0.457	0.833711	0.00072	0.0576876
56106	PCDHGA10	0.4781	0.849846	0.00073	0.0576876
10484	SEC23A	0.452	0.829663	0.00073	0.0576876
55002	TMCO3	0.4307	0.8114	0.00073	0.0576876
79586	CHPF	0.4779	0.8497	0.00074	0.0578703
2303	FOXC2	0.4403	0.819839	0.00074	0.0578703
23062	GGA2	-0.4755	-0.867433	0.00075	0.0578703
3421	IDH3G	-0.455	-0.852599	0.00075	0.0578703
55243	KIRREL	0.407	0.789036	0.00075	0.0578703
3681	ITGAD	-0.49	-0.877075	0.00076	0.0580938
26279	PLA2G2D	-0.4546	-0.852295	0.00076	0.0580938
5049	PAFAH1B2	0.4533	0.830724	0.00077	0.0582614
6559	SLC12A3	-0.4645	-0.859654	0.00077	0.0582614
2828	GPR4	0.5032	0.86716	0.00078	0.0582614
12	SERPINA3	0.439	0.818716	0.00078	0.0582614
399694	SHC4	0.4453	0.824098	0.00078	0.0582614
3028	HSD17B10	-0.4193	-0.82308	0.00079	0.0587401
5139	PDE3A	0.4787	0.850283	0.0008	0.0589477
147138	TMC8	-0.436	-0.837501	0.0008	0.0589477
79637	ARMC7	-0.4968	-0.881367	0.00081	0.0591517
1301	COL11A1	0.456	0.832908	0.00081	0.0591517
30001	ERO1L	0.4805	0.851587	0.00083	0.0598112
100188949	LOC100188949	-0.42	-0.823707	0.00083	0.0598112
55529	TMEM55A	0.48	0.851226	0.00083	0.0598112
164284	APCDD1L	0.4444	0.823338	0.00084	0.0600031
4063	LY9	-0.421	-0.8246	0.00084	0.0600031
1445	CSK	-0.4402	-0.840955	0.00085	0.0604535
54555	DDX49	-0.4476	-0.846879	0.00086	0.0608999
8273	SLC10A3	-0.4447	-0.844582	0.00087	0.0610792
389898	UBE2NL	-0.4187	-0.822541	0.00087	0.0610792
3131	HLF	-0.4424	-0.842738	0.00088	0.0612555
126295	ZNF57	-0.4166	-0.820643	0.00088	0.0612555
9113	LATS1	0.4373	0.817239	0.00089	0.0614288
3987	LIMS1	0.4437	0.822745	0.00089	0.0614288
3087	HHEX	-0.458	-0.854862	0.00091	0.0625453
280655	C14orf19	-0.442	-0.842415	0.00092	0.0627057
93323	HAUS8	-0.4753	-0.867295	0.00092	0.0627057
8609	KLF7	0.4382	0.818023	0.00094	0.0634031
2194	FASN	0.41034	0.792324	0.00095	0.0634031
254559	LOC254559	-0.4579	-0.854787	0.00095	0.0634031
292	SLC25A5	-0.4404	-0.841118	0.00095	0.0634031
374291	NDUFS7	-0.4502	-0.848911	0.00098	0.0634031
6901	TAZ	-0.458	-0.854862	0.00098	0.0634031
5238	PGM3	0.465	0.840006	0.00099	0.0634031
163154	PRR22	-0.4191	-0.822901	0.00099	0.0634031
128611	ZNF831	-0.4139	-0.818175	0.00099	0.0634031
51433	ANAPC5	-0.4328	-0.834823	0.001	0.0634031
221395	GPR116	0.4926	0.860087	0.001	0.0634031
55083	KIF26B	0.4766	0.848748	0.001	0.0634031
4238	MFAP3	0.4391	0.818803	0.001	0.0634031
23596	OPN3	0.485	0.854802	0.001	0.0634031
55819	RNF130	-0.5191	-0.894478	0.001	0.0634031
26015	RPAP1	0.4741	0.846902	0.001	0.0634031
51150	SDF4	0.4541	0.831374	0.001	0.0634031
9015	TAF1A	0.4352	0.815399	0.001	0.0634031
79827	ASAM	0.4753	0.84779	0.0011	0.0656708
56913	C1GALT1	0.4463	0.824939	0.0011	0.0656708
79074	C2orf49	0.4558	0.832747	0.0011	0.0656708
10486	CAP2	0.4502	0.828183	0.0011	0.0656708
124817	CNTD1	-0.4411	-0.841687	0.0011	0.0656708
53905	DUOX1	-0.5213	-0.895695	0.0011	0.0656708
3910	LAMA4	0.475	0.847569	0.0011	0.0656708
4899	NRF1	-0.4599	-0.856278	0.0011	0.0656708
441194	PMS2CL	0.4595	0.835702	0.0011	0.0656708
10609	SC65	0.4407	0.820183	0.0011	0.0656708
9123	SLC16A3	0.4635	0.838842	0.0011	0.0656708
6626	SNRPA	-0.4628	-0.858415	0.0011	0.0656708
55061	SUSD4	-0.4542	-0.85199	0.0011	0.0656708
286102	TMED10P1	0.4207	0.802235	0.0011	0.0656708
29802	VPREB3	-0.441	-0.841606	0.0011	0.0656708
440590	ZYG11A	-0.4472	-0.846564	0.0011	0.0656708
8038	ADAM12	0.4614	0.8372	0.0012	0.0681583
813	CALU	0.4929	0.860292	0.0012	0.0681583
930	CD19	-0.4299	-0.832362	0.0012	0.0681583
83548	COG3	0.43199	0.812554	0.0012	0.0681583
203522	DDX26B	-0.4504	-0.849067	0.0012	0.0681583
360132	FKBP9L	0.4072	0.789234	0.0012	0.0681583
10272	FSTL3	0.4446	0.823507	0.0012	0.0681583
474382	H2AFB1	-0.4469	-0.846327	0.0012	0.0681583
5654	HTRA1	0.4333	0.81372	0.0012	0.0681583
10527	IPO7	0.4474	0.82586	0.0012	0.0681583
84078	KBTBD7	0.4523	0.829908	0.0012	0.0681583
6594	SMARCA1	0.4673	0.841775	0.0012	0.0681583
54210	TREM1	0.451	0.828842	0.0012	0.0681583
389136	VGLL3	0.4694	0.843375	0.0012	0.0681583
10270	AKAP8	-0.4374	-0.83866	0.0013	0.0716007
50619	DEF6	-0.4469	-0.846327	0.0013	0.0716007
80267	EDEM3	0.44	0.81958	0.0013	0.0716007
26260	FBXO25	-0.4282	-0.830904	0.0013	0.0716007
643008	LOC643008	-0.4733	-0.86591	0.0013	0.0716007
644538	LOC644538	0.4402	0.819753	0.0013	0.0716007
94274	PPP1R14A	0.444	0.822999	0.0013	0.0716007
9827	RGP1	0.4314	0.812027	0.0013	0.0716007
55787	TXLNG	0.499	0.864398	0.0013	0.0716007
441425	ANKRD20A3	-0.445	-0.844821	0.0014	0.0745967
30008	EFEMP2	0.4741	0.846902	0.0014	0.0745967
55747	FAM21B	-0.4094	-0.813995	0.0014	0.0745967
3553	IL1B	0.4581	0.834589	0.0014	0.0745967
143458	LDLRAD3	0.4688	0.842919	0.0014	0.0745967
9355	LHX2	-0.4076	-0.812299	0.0014	0.0745967
9053	MAP7	0.42945	0.810276	0.0014	0.0745967
4713	NDUFB7	-0.4462	-0.845774	0.0014	0.0745967
26255	PTTG3P	-0.4263	-0.829261	0.0014	0.0745967
1731	2015-09-01	-0.41	-0.814557	0.0014	0.0745967
200810	ALG1L	-0.4755	-0.867433	0.0015	0.0762019
121642	ALKBH2	-0.46456	-0.859698	0.0015	0.0762019
8623	ASMTL	-0.4212	-0.824778	0.0015	0.0762019
25770	C22orf31	-0.4681	-0.862245	0.0015	0.0762019
733	C8G	-0.4474	-0.846721	0.0015	0.0762019
51117	COQ4	-0.4325	-0.83457	0.0015	0.0762019
91319	DERL3	-0.4511	-0.849609	0.0015	0.0762019
2332	FMR1	-0.4223	-0.825753	0.0015	0.0762019
2677	GGCX	0.4144	0.796259	0.0015	0.0762019
493869	GPX8	0.4372	0.817152	0.0015	0.0762019
4204	MECP2	-0.4506	-0.849222	0.0015	0.0762019
7045	TGFBI	0.4213	0.802796	0.0015	0.0762019
50999	TMED5	0.426	0.807141	0.0015	0.0762019
9966	TNFSF15	0.42017	0.801738	0.0015	0.0762019
84937	ZNRF1	-0.4401	-0.840874	0.0015	0.0762019
27125	AFF4	0.4327	0.813187	0.0016	0.078597
430	ASCL2	-0.459	-0.855609	0.0016	0.078597
113802	C1orf59	-0.4255	-0.828564	0.0016	0.078597
148304	C1orf74	0.4381	0.817936	0.0016	0.078597
116254	C6orf72	0.4281	0.809055	0.0016	0.078597
51148	CERCAM	0.4212	0.802703	0.0016	0.078597
84518	CNFN	-0.4504	-0.849067	0.0016	0.078597
2920	CXCL2	0.4855	0.855155	0.0016	0.078597
55578	FAM48A	0.4111	0.793066	0.0016	0.078597
606724	LOC606724	-0.3996	-0.804591	0.0016	0.078597
23683	PRKD3	0.4189	0.800544	0.0016	0.078597
87	ACTN1	0.4565	0.83331	0.0017	0.080839
11173	ADAMTS7	0.4295	0.810321	0.0017	0.080839
1325	CORT	-0.466	-0.860739	0.0017	0.080839
9820	CUL7	0.4537	0.831049	0.0017	0.080839
10489	LRRC41	0.398	0.779948	0.0017	0.080839
10802	SEC24A	0.4431	0.822235	0.0017	0.080839
344558	SH3RF3	0.4742	0.846976	0.0017	0.080839
80704	SLC19A3	0.428	0.808964	0.0017	0.080839
79622	SNRNP25	-0.4463	-0.845853	0.0017	0.080839
100302736	TMED7-TICAM2	0.4137	0.795586	0.0017	0.080839
55754	TMEM30A	0.45	0.828018	0.0017	0.080839
10487	CAP1	0.4162	0.797983	0.0018	0.08179
23492	CBX7	-0.461	-0.857092	0.0018	0.08179
1315	COPB1	0.423	0.804378	0.0018	0.08179
1580	CYP4B1	-0.4157	-0.819824	0.0018	0.08179
1632	DCI	-0.4467	-0.846169	0.0018	0.08179
146433	IL34	-0.4132	-0.817531	0.0018	0.08179
22914	KLRK1	-0.423	-0.826372	0.0018	0.08179
284217	LAMA1	0.4233	0.804655	0.0018	0.08179
90411	MCFD2	0.4138	0.795682	0.0018	0.08179
5111	PCNA	-0.433	-0.834992	0.0018	0.08179
5806	PTX3	0.4501	0.828101	0.0018	0.08179
5886	RAD23A	-0.422	-0.825488	0.0018	0.08179
642658	SCXB	0.4221	0.803542	0.0018	0.08179
55089	SLC38A4	0.4378	0.817675	0.0018	0.08179
57687	VAT1L	0.4643	0.839464	0.0018	0.08179
7535	ZAP70	-0.386	-0.790839	0.0018	0.08179
56895	AGPAT4	0.4477	0.82611	0.0019	0.0835489
27301	APEX2	-0.3941	-0.79913	0.0019	0.0835489
79173	C19orf57	-0.4812	-0.871304	0.0019	0.0835489
1118	CHIT1	-0.4039	-0.808768	0.0019	0.0835489
2921	CXCL3	0.43	0.810771	0.0019	0.0835489
2519	FUCA2	0.4135	0.795393	0.0019	0.0835489
145748	LYSMD4	-0.4115	-0.815956	0.0019	0.0835489
4907	NT5E	0.3983	0.780256	0.0019	0.0835489
10501	SEMA6B	0.4199	0.801485	0.0019	0.0835489
85360	SYDE1	0.4061	0.788142	0.0019	0.0835489
81839	VANGL1	0.3919	0.773594	0.0019	0.0835489
3104	ZBTB48	-0.4286	-0.831248	0.0019	0.0835489
196527	ANO6	0.4075	0.789531	0.002	0.085644
64174	DPEP2	-0.365	-0.767927	0.002	0.085644
1870	E2F2	-0.4545	-0.852219	0.002	0.085644
3364	HUS1	0.44	0.81958	0.002	0.085644
5214	PFKP	0.4212	0.802703	0.002	0.085644
5796	PTPRK	0.4223	0.803728	0.002	0.085644
81894	SLC25A28	-0.4098	-0.81437	0.002	0.085644
8793	TNFRSF10D	0.3807	0.761511	0.002	0.085644
10381	TUBB3	0.4157	0.797505	0.002	0.085644
7750	ZMYM2	0.42551	0.806692	0.002	0.085644
119385	AGAP11	-0.4225	-0.82593	0.0021	0.0878563
28990	ASTE1	-0.4259	-0.828913	0.0021	0.0878563
158381	ATP8B5P	-0.4058	-0.810589	0.0021	0.0878563
911	CD1C	-0.4284	-0.831076	0.0021	0.0878563
161247	FITM1	-0.4194	-0.82317	0.0021	0.0878563
3326	HSP90AB1	0.4504	0.828348	0.0021	0.0878563
23143	LRCH1	0.3832	0.764256	0.0021	0.0878563
81555	YIPF5	0.434	0.81434	0.0021	0.0878563
7566	ZNF18	-0.445	-0.844821	0.0021	0.0878563
2782	GNB1	0.4288	0.809689	0.0022	0.0904211
3801	KIFC3	0.4157	0.797505	0.0022	0.0904211
339674	LOC339674	-0.4307	-0.833044	0.0022	0.0904211
729020	LOC729020	0.405	0.787046	0.0022	0.0904211
4325	MMP16	0.4509	0.82876	0.0022	0.0904211
8776	MTMR1	-0.4073	-0.812015	0.0022	0.0904211
81619	TSPAN14	-0.4345	-0.836251	0.0022	0.0904211
10327	AKR1A1	-0.3863	-0.791152	0.0023	0.0915411
151888	BTLA	-0.3933	-0.798324	0.0023	0.0915411
939	CD27	-0.373	-0.776902	0.0023	0.0915411
645455	CEP170L	0.4249	0.806132	0.0023	0.0915411
392617	ELFN1	0.449	0.827191	0.0023	0.0915411
56132	PCDHB3	0.4348	0.815047	0.0023	0.0915411
548644	POLR2J3	-0.4203	-0.823975	0.0023	0.0915411
10744	PTTG2	-0.4325	-0.83457	0.0023	0.0915411
7035	TFPI	0.4549	0.832021	0.0023	0.0915411
9220	TIAF1	-0.4499	-0.848678	0.0023	0.0915411
283232	TMEM80	-0.4372	-0.838495	0.0023	0.0915411
92092	ZC3HAV1L	0.4021	0.78413	0.0023	0.0915411
162979	ZNF296	-0.4095	-0.814089	0.0023	0.0915411
9829	DNAJC6	0.4173	0.79903	0.0024	0.0941468
2078	ERG	0.4533	0.830724	0.0024	0.0941468
9130	FAM50A	-0.4544	-0.852143	0.0024	0.0941468
55127	HEATR1	0.4267	0.807781	0.0024	0.0941468
9060	PAPSS2	0.4275	0.80851	0.0024	0.0941468
83861	RSPH3	0.4278	0.808782	0.0024	0.0941468
8862	APLN	0.4388	0.818543	0.0025	0.0957728
1000	CDH2	0.4508	0.828678	0.0025	0.0957728
401541	CENPP	-0.4294	-0.831934	0.0025	0.0957728
55527	FEM1A	-0.3868	-0.791671	0.0025	0.0957728
10661	KLF1	-0.4468	-0.846248	0.0025	0.0957728
5261	PHKG2	-0.4357	-0.837252	0.0025	0.0957728
60675	PROK2	0.4354	0.815575	0.0025	0.0957728
5634	PRPS2	-0.3823	-0.786953	0.0025	0.0957728
387694	SH2D4B	-0.418	-0.821911	0.0025	0.0957728
91544	UBXN11	-0.433	-0.834992	0.0025	0.0957728
653308	ASAH2B	0.4	0.781996	0.0026	0.0958209
57213	C13orf1	0.4287	0.809598	0.0026	0.0958209
29965	C16orf5	-0.3889	-0.793842	0.0026	0.0958209
1277	COL1A1	0.4147	0.796547	0.0026	0.0958209
2746	GLUD1	-0.4116	-0.816049	0.0026	0.0958209
3640	INSL3	-0.3892	-0.79415	0.0026	0.0958209
8544	PIR	-0.4066	-0.81135	0.0026	0.0958209
100169750	PRINS	-0.4071	-0.811825	0.0026	0.0958209
9475	ROCK2	0.4211	0.802609	0.0026	0.0958209
55356	SLC22A15	0.4112	0.793163	0.0026	0.0958209
27173	SLC39A1	0.396	0.777882	0.0026	0.0958209
23471	TRAM1	0.4247	0.805948	0.0026	0.0958209
205	AK3L1	0.3962	0.778089	0.0027	0.0958209
152641	C4orf38	0.4029	0.784938	0.0027	0.0958209
9859	CEP170	0.4434	0.82249	0.0027	0.0958209
60678	EEFSEC	-0.38684	-0.791713	0.0027	0.0958209
399665	FAM102A	-0.3675	-0.770765	0.0027	0.0958209
147965	FAM98C	-0.4297	-0.832191	0.0027	0.0958209
2969	GTF2I	0.4369	0.81689	0.0027	0.0958209
3294	HSD17B2	0.3934	0.775171	0.0027	0.0958209
3312	HSPA8	0.4037	0.785743	0.0027	0.0958209
3339	HSPG2	0.4456	0.824351	0.0027	0.0958209
100303728	LOC100303728	-0.3843	-0.789062	0.0027	0.0958209
83752	LONP2	0.4043	0.786345	0.0027	0.0958209
10903	MTMR11	0.373	0.752885	0.0027	0.0958209
197358	NLRC3	-0.3902	-0.795175	0.0027	0.0958209
754	PTTG1IP	0.373	0.752885	0.0027	0.0958209
29957	SLC25A24	0.411	0.792968	0.0027	0.0958209
55620	STAP2	-0.4425	-0.842818	0.0027	0.0958209
81793	TLR10	-0.3806	-0.785146	0.0027	0.0958209
60487	TRMT11	0.4181	0.799788	0.0027	0.0958209
9875	URB1	0.45	0.828018	0.0027	0.0958209
219333	USP12	0.4332	0.813631	0.0027	0.0958209
8540	AGPS	0.4406	0.820097	0.0028	0.0958209
164668	APOBEC3H	-0.3661	-0.76918	0.0028	0.0958209
387885	CCDC42B	-0.4013	-0.806252	0.0028	0.0958209
440275	EIF2AK4	0.441	0.820441	0.0028	0.0958209
644619	INTS4L2	0.4162	0.797983	0.0028	0.0958209
340533	KIAA2022	-0.455	-0.852599	0.0028	0.0958209
3912	LAMB1	0.434	0.81434	0.0028	0.0958209
8775	NAPA	-0.4156	-0.819733	0.0028	0.0958209
23385	NCSTN	0.4083	0.790321	0.0028	0.0958209
27303	RBMS3	0.4439	0.822915	0.0028	0.0958209
6515	SLC2A3	0.409	0.79101	0.0028	0.0958209
26000	TBC1D10B	-0.4013	-0.806252	0.0028	0.0958209
7022	TFAP2C	-0.4243	-0.827515	0.0028	0.0958209
10959	TMED2	0.4217	0.803169	0.0028	0.0958209
360023	ZBTB41	0.4191	0.800732	0.0028	0.0958209
55713	ZNF334	0.414	0.795875	0.0028	0.0958209
152485	ZNF827	0.4194	0.801015	0.0028	0.0958209
7579	ZSCAN20	0.4079	0.789927	0.0028	0.0958209
1003	CDH5	0.4561	0.832989	0.0029	0.0964191
1281	COL3A1	0.4206	0.802141	0.0029	0.0964191
1290	COL5A2	0.4384	0.818196	0.0029	0.0964191
1877	E4F1	-0.4276	-0.830387	0.0029	0.0964191
2109	ETFB	-0.4077	-0.812393	0.0029	0.0964191
2323	FLT3LG	-0.4417	-0.842173	0.0029	0.0964191
55568	GALNT10	0.4151	0.796931	0.0029	0.0964191
23193	GANAB	0.41	0.791991	0.0029	0.0964191
9817	KEAP1	-0.4369	-0.838247	0.0029	0.0964191
3976	LIF	0.4552	0.832264	0.0029	0.0964191
51054	PLEKHA9	0.4097	0.791697	0.0029	0.0964191
149345	SHISA4	0.414	0.795875	0.0029	0.0964191
80727	TTYH3	0.3969	0.778814	0.0029	0.0964191
55293	UEVLD	0.4537	0.831049	0.0029	0.0964191
1032	CDKN2D	-0.4305	-0.832874	0.003	0.0985422
89846	FGD3	-0.388	-0.792914	0.003	0.0985422
2879	GPX4	-0.4033	-0.80819	0.003	0.0985422
5985	RFC5	-0.385	-0.789795	0.003	0.0985422
5054	SERPINE1	0.4069	0.788937	0.003	0.0985422
10781	ZNF266	-0.408	-0.812677	0.003	0.0985422
54939	COMMD4	-0.4009	-0.805862	0.0031	0.100415
170589	GPHA2	-0.43571	-0.83726	0.0031	0.100415
54979	HRASLS2	-0.4251	-0.828215	0.0031	0.100415
414332	LCN10	-0.4103	-0.814838	0.0031	0.100415
64976	MRPL40	-0.39	-0.79497	0.0031	0.100415
5566	PRKACA	-0.4144	-0.818635	0.0031	0.100415
92104	TTC30A	0.3821	0.763052	0.0031	0.100415
586	BCAT1	0.4168	0.798554	0.0032	0.102237
1437	CSF2	0.434	0.81434	0.0032	0.102237
27248	ERLEC1	0.4061	0.788142	0.0032	0.102237
4124	MAN2A1	0.4062	0.788242	0.0032	0.102237
4694	NDUFA1	-0.4173	-0.821278	0.0032	0.102237
9145	SYNGR1	-0.3653	-0.76827	0.0032	0.102237
80014	WWC2	0.4071	0.789135	0.0032	0.102237
151516	ASPRV1	-0.3816	-0.786211	0.0033	0.103018
123591	C15orf27	-0.396	-0.801031	0.0033	0.103018
440465	FLJ90757	0.3922	0.77391	0.0033	0.103018
8322	FZD4	0.4097	0.791697	0.0033	0.103018
51141	INSIG2	0.3783	0.758851	0.0033	0.103018
4922	NTS	-0.4365	-0.837916	0.0033	0.103018
5230	PGK1	0.3879	0.769341	0.0033	0.103018
11196	SEC23IP	0.3986	0.780564	0.0033	0.103018
6696	SPP1	0.39805	0.779999	0.0033	0.103018
146771	TCAM1P	-0.424	-0.827252	0.0033	0.103018
283989	TSEN54	-0.4481	-0.847271	0.0033	0.103018
89891	WDR34	-0.4046	-0.809441	0.0033	0.103018
9719	ADAMTSL2	0.459	0.835305	0.0034	0.10357
124359	CDYL2	0.4286	0.809508	0.0034	0.10357
1050	CEBPA	-0.4383	-0.839401	0.0034	0.10357
337876	CHSY3	0.4113	0.79326	0.0034	0.10357
1781	DYNC1I2	0.4086	0.790617	0.0034	0.10357
9750	FAM65B	-0.39887	-0.803874	0.0034	0.10357
3766	KCNJ10	-0.3962	-0.801231	0.0034	0.10357
9645	MICAL2	0.3893	0.770838	0.0034	0.10357
22795	NID2	0.4387	0.818456	0.0034	0.10357
5664	PSEN2	0.3796	0.760295	0.0034	0.10357
9886	RHOBTB1	0.4112	0.793163	0.0034	0.10357
6307	SC4MOL	0.4137	0.795586	0.0034	0.10357
11346	SYNPO	0.3911	0.772749	0.0034	0.10357
23250	ATP11A	0.3959	0.777778	0.0035	0.105244
23048	FNBP1	-0.3861	-0.790944	0.0035	0.105244
3257	HPS1	-0.3729	-0.776792	0.0035	0.105244
5096	PCCB	-0.3787	-0.783111	0.0035	0.105244
9701	SAPS2	-0.3538	-0.754837	0.0035	0.105244
80255	SLC35F5	0.383	0.764037	0.0035	0.105244
9320	TRIP12	0.3985	0.780461	0.0035	0.105244
655	BMP7	-0.397	-0.802026	0.0036	0.107071
1417	CRYBB3	-0.4302	-0.832618	0.0036	0.107071
60401	EDA2R	0.4212	0.802703	0.0036	0.107071
117248	GALNTL2	0.395	0.776843	0.0036	0.107071
9840	KIAA0748	-0.3662	-0.769293	0.0036	0.107071
9814	SFI1	-0.4004	-0.805374	0.0036	0.107071
53947	A4GALT	-0.4126	-0.816976	0.0037	0.107504
9508	ADAMTS3	0.3987	0.780667	0.0037	0.107504
11216	AKAP10	0.385	0.766215	0.0037	0.107504
93081	C13orf27	-0.41112	-0.815603	0.0037	0.107504
1295	COL8A1	0.4032	0.78524	0.0037	0.107504
1798	DPAGT1	0.385	0.766215	0.0037	0.107504
2004	ELK3	0.4223	0.803728	0.0037	0.107504
3820	KLRB1	-0.3562	-0.757694	0.0037	0.107504
284023	LOC284023	-0.3979	-0.802917	0.0037	0.107504
254552	NUDT8	-0.4327	-0.834739	0.0037	0.107504
56950	SMYD2	0.356	0.732887	0.0037	0.107504
9375	TM9SF2	0.3738	0.753793	0.0037	0.107504
55761	TTC17	0.3706	0.750141	0.0037	0.107504
64072	CDH23	-0.3953	-0.800333	0.0038	0.109437
8517	IKBKG	-0.3893	-0.794253	0.0038	0.109437
3915	LAMC1	0.4261	0.807232	0.0038	0.109437
349565	NMNAT3	-0.3736	-0.777563	0.0038	0.109437
84820	POLR2J4	-0.431	-0.8333	0.0038	0.109437
10097	ACTR2	0.3849	0.766106	0.0039	0.110183
9823	ARMCX2	0.4192	0.800827	0.0039	0.110183
6361	CCL17	-0.4201	-0.823797	0.0039	0.110183
9069	CLDN12	0.372	0.751745	0.0039	0.110183
80034	CSRNP3	0.41251	0.794436	0.0039	0.110183
2618	GART	0.4125	0.794426	0.0039	0.110183
51763	INPP5K	-0.415	-0.819184	0.0039	0.110183
9180	OSMR	0.3715	0.751173	0.0039	0.110183
143	PARP4	0.3636	0.741991	0.0039	0.110183
51294	PCDH12	0.4244	0.805672	0.0039	0.110183
57835	SLC4A5	-0.441	-0.841606	0.0039	0.110183
996	CDC27	0.4076	0.78963	0.004	0.111659
85443	DCLK3	0.3975	0.779433	0.004	0.111659
1869	E2F1	-0.3832	-0.787904	0.004	0.111659
2887	GRB10	0.4036	0.785642	0.004	0.111659
85379	KIAA1671	-0.3796	-0.784077	0.004	0.111659
8802	SUCLG1	-0.4352	-0.836835	0.004	0.111659
7411	VBP1	-0.4154	-0.81955	0.004	0.111659
1628	DBP	-0.3965	-0.801529	0.0041	0.11253
116729	DYSFIP1	-0.3862	-0.791048	0.0041	0.11253
84337	ELOF1	-0.3927	-0.797718	0.0041	0.11253
283991	FAM100B	-0.407	-0.81173	0.0041	0.11253
168455	FLJ36031	0.4162	0.797983	0.0041	0.11253
4121	MAN1A1	0.404	0.786044	0.0041	0.11253
8698	S1PR4	-0.35792	-0.759725	0.0041	0.11253
6529	SLC6A1	0.38107	0.761919	0.0041	0.11253
55854	ZC3H15	0.4144	0.796259	0.0041	0.11253
55146	ZDHHC4	0.4201	0.801673	0.0041	0.11253
339201	C17orf65	-0.4082	-0.812866	0.0042	0.11356
916	CD3E	-0.3524	-0.753157	0.0042	0.11356
1314	COPA	0.4235	0.804841	0.0042	0.11356
23234	DNAJC9	-0.39691	-0.801937	0.0042	0.11356
57291	KIAA0114	-0.3706	-0.774242	0.0042	0.11356
83874	TBC1D10A	-0.4124	-0.816791	0.0042	0.11356
54664	TMEM106B	0.3949	0.776738	0.0042	0.11356
154807	VKORC1L1	0.3956	0.777467	0.0042	0.11356
94039	ZNF101	-0.3489	-0.748913	0.0042	0.11356
51411	BIN2	-0.3346	-0.730919	0.0043	0.114428
820	CAMP	-0.424	-0.827252	0.0043	0.114428
10085	EDIL3	0.393	0.774751	0.0043	0.114428
10151	HNRNPA3P1	-0.3857	-0.790527	0.0043	0.114428
4700	NDUFA6	-0.3778	-0.782141	0.0043	0.114428
5325	PLAGL1	0.3976	0.779536	0.0043	0.114428
5883	RAD9A	-0.4009	-0.805862	0.0043	0.114428
51429	SNX9	0.3623	0.740453	0.0043	0.114428
10554	AGPAT1	0.376	0.756277	0.0044	0.114428
375790	AGRN	0.3911	0.772749	0.0044	0.114428
351	APP	0.3711	0.750715	0.0044	0.114428
378	ARF4	0.4141	0.795971	0.0044	0.114428
148170	CDC42EP5	0.352	0.727987	0.0044	0.114428
1363	CPE	0.363	0.741282	0.0044	0.114428
79888	LPCAT1	0.4095	0.791501	0.0044	0.114428
729633	MRS2P2	-0.3902	-0.795175	0.0044	0.114428
931	MS4A1	-0.3685	-0.771892	0.0044	0.114428
5579	PRKCB	-0.3633	-0.76598	0.0044	0.114428
4218	RAB8A	-0.3641	-0.766898	0.0044	0.114428
84138	SLC7A6OS	0.415	0.796835	0.0044	0.114428
6689	SPIB	-0.358	-0.759819	0.0044	0.114428
100134938	UPK3BL	-0.3676	-0.770878	0.0044	0.114428
29796	UQCR10	-0.3946	-0.799632	0.0044	0.114428
27033	ZBTB32	-0.3638	-0.766554	0.0044	0.114428
9411	ARHGAP29	0.409	0.79101	0.0045	0.115923
1386	ATF2	0.3871	0.768483	0.0045	0.115923
1269	CNR2	-0.4294	-0.831934	0.0045	0.115923
1303	COL12A1	0.3595	0.737113	0.0045	0.115923
148932	MOBKL2C	-0.386	-0.790839	0.0045	0.115923
83959	SLC4A11	-0.4086	-0.813243	0.0045	0.115923
10449	ACAA2	0.3698	0.749221	0.0046	0.116662
64682	ANAPC1	0.4001	0.782098	0.0046	0.116662
1776	DNASE1L3	-0.374	-0.778003	0.0046	0.116662
81887	LAS1L	-0.3737	-0.777673	0.0046	0.116662
3953	LEPR	0.3735	0.753453	0.0046	0.116662
80274	SCUBE1	-0.3784	-0.782788	0.0046	0.116662
10507	SEMA4D	-0.3607	-0.762975	0.0046	0.116662
51330	TNFRSF12A	0.3851	0.766323	0.0046	0.116662
9652	TTC37	0.383	0.764037	0.0046	0.116662
53347	UBASH3A	-0.3609	-0.763207	0.0046	0.116662
31	ACACA	0.3696	0.748991	0.0047	0.118099
129138	ANKRD54	-0.369	-0.772454	0.0047	0.118099
57120	GOPC	0.3672	0.74621	0.0047	0.118099
60598	KCNK15	0.41	0.791991	0.0047	0.118099
158376	LOC158376	0.4104	0.792383	0.0047	0.118099
55544	RBM38	-0.3474	-0.747075	0.0047	0.118099
115201	ATG4A	-0.4035	-0.808383	0.0048	0.118787
90736	FAM104B	-0.3638	-0.766554	0.0048	0.118787
729920	ISPD	0.3917	0.773383	0.0048	0.118787
163782	KANK4	0.3917	0.773383	0.0048	0.118787
3948	LDHC	-0.3741	-0.778112	0.0048	0.118787
138151	NACC2	0.4131	0.795006	0.0048	0.118787
2923	PDIA3	0.3854	0.766648	0.0048	0.118787
387990	TOMM20L	-0.4194	-0.82317	0.0048	0.118787
158248	TTC16	-0.376	-0.780189	0.0048	0.118787
83719	YPEL3	-0.34	-0.737839	0.0048	0.118787
3426	CFI	0.3998	0.781792	0.0049	0.1191
79368	FCRL2	-0.3811	-0.785679	0.0049	0.1191
23240	KIAA0922	-0.3698	-0.773349	0.0049	0.1191
65095	KRI1	-0.4072	-0.81192	0.0049	0.1191
55784	MCTP2	0.383	0.764037	0.0049	0.1191
5066	PAM	0.39	0.771583	0.0049	0.1191
5450	POU2AF1	-0.3874	-0.792294	0.0049	0.1191
5861	RAB1A	0.405	0.787046	0.0049	0.1191
5862	RAB2A	0.3687	0.747951	0.0049	0.1191
6118	RPA2	-0.3893	-0.794253	0.0049	0.1191
9143	SYNGR3	-0.357	-0.758641	0.0049	0.1191
7693	ZNF134	0.3588	0.736272	0.0049	0.1191
64422	ATG3	-0.3814	-0.785998	0.005	0.120634
2591	GALNT3	0.3591	0.736633	0.005	0.120634
4249	MGAT5	0.3941	0.775904	0.005	0.120634
4901	NRL	-0.3668	-0.769974	0.005	0.120634
55238	SLC38A7	0.3886	0.770091	0.005	0.120634
119	ADD2	0.4155	0.797314	0.0051	0.122325
729171	ANKRD20B	-0.3945	-0.799531	0.0051	0.122325
126328	NDUFA11	-0.3838	-0.788536	0.0051	0.122325
285590	SH3PXD2B	0.3813	0.762173	0.0051	0.122325
415	ARSE	0.388	0.769448	0.0052	0.122567
2050	EPHB4	0.4042	0.786245	0.0052	0.122567
9679	FAM53B	-0.408	-0.812677	0.0052	0.122567
146330	FBXL16	-0.3754	-0.779535	0.0052	0.122567
8820	HESX1	-0.3681	-0.771442	0.0052	0.122567
55699	IARS2	0.4118	0.793747	0.0052	0.122567
79035	OBFC2B	-0.3918	-0.796806	0.0052	0.122567
5083	PAX9	-0.357	-0.758641	0.0052	0.122567
91608	RASL10B	0.384	0.765128	0.0052	0.122567
645683	RPL13AP3	-0.3896	-0.794561	0.0052	0.122567
54437	SEMA5B	0.3797	0.760406	0.0052	0.122567
374403	TBC1D10C	-0.3488	-0.74879	0.0052	0.122567
1666	DECR1	-0.3727	-0.776571	0.0053	0.123501
27165	GLS2	-0.3945	-0.799531	0.0053	0.123501
3099	HK2	0.4028	0.784837	0.0053	0.123501
3839	KPNA3	0.388	0.769448	0.0053	0.123501
23509	POFUT1	0.3865	0.767837	0.0053	0.123501
949	SCARB1	0.3921	0.773805	0.0053	0.123501
54733	SLC35F2	0.3955	0.777363	0.0053	0.123501
10418	SPON1	0.3768	0.757175	0.0053	0.123501
317749	DHRS4L2	-0.39564	-0.800672	0.0054	0.124063
3006	HIST1H1C	-0.39823	-0.803243	0.0054	0.124063
23065	KIAA0090	0.3646	0.743169	0.0054	0.124063
347240	KIF24	-0.3624	-0.764944	0.0054	0.124063
644165	LOC644165	-0.3834	-0.788115	0.0054	0.124063
4313	MMP2	0.3842	0.765346	0.0054	0.124063
9107	MTMR6	0.412	0.793941	0.0054	0.124063
8985	PLOD3	0.3788	0.759407	0.0054	0.124063
83549	UCK1	-0.3985	-0.803509	0.0054	0.124063
7580	ZNF32	-0.4072	-0.81192	0.0054	0.124063
9509	ADAMTS2	0.3821	0.763052	0.0055	0.125305
64115	C10orf54	-0.3692	-0.772678	0.0055	0.125305
844	CASQ1	-0.3641	-0.766898	0.0055	0.125305
23580	CDC42EP4	-0.3853	-0.790109	0.0055	0.125305
11014	KDELR2	0.4028	0.784837	0.0055	0.125305
5163	PDK1	0.3841	0.765237	0.0055	0.125305
84624	FNDC1	0.3981	0.78005	0.0056	0.126876
2805	GOT1	-0.3847	-0.789481	0.0056	0.126876
4149	MAX	-0.3612	-0.763556	0.0056	0.126876
25907	TMEM158	0.3901	0.771689	0.0056	0.126876
35	ACADS	-0.3806	-0.785146	0.0057	0.127552
1288	COL4A6	0.3953	0.777155	0.0057	0.127552
1650	DDOST	0.3923	0.774015	0.0057	0.127552
27294	DHDH	-0.3606	-0.762859	0.0057	0.127552
5098	PCDHGC3	0.384	0.765128	0.0057	0.127552
5784	PTPN14	0.343	0.716684	0.0057	0.127552
10325	RRAGB	-0.3835	-0.78822	0.0057	0.127552
347734	SLC35B2	0.3881	0.769556	0.0057	0.127552
134957	STXBP5	0.408	0.790025	0.0057	0.127552
653553	?	-0.3699	-0.773461	0.0058	0.128038
140564	APOBEC3D	-0.3494	-0.749523	0.0058	0.128038
51279	C1RL	0.3661	0.744927	0.0058	0.128038
8318	CDC45	-0.3511	-0.751587	0.0058	0.128038
10525	HYOU1	0.3806	0.761401	0.0058	0.128038
3490	IGFBP7	0.385	0.766215	0.0058	0.128038
9209	LRRFIP2	-0.3674	-0.770652	0.0058	0.128038
143503	OR51E1	0.378	0.758516	0.0058	0.128038
5865	RAB3B	0.3782	0.758739	0.0058	0.128038
7319	UBE2A	-0.3675	-0.770765	0.0058	0.128038
3267	AGFG1	0.392	0.773699	0.0059	0.128855
168620	BHLHA15	0.3859	0.767189	0.0059	0.128855
6354	CCL7	0.3643	0.742816	0.0059	0.128855
154141	MBOAT1	-0.3546	-0.755793	0.0059	0.128855
55239	OGFOD1	0.3926	0.774331	0.0059	0.128855
54661	PCDHB17	0.4156	0.79741	0.0059	0.128855
51367	POP5	-0.3866	-0.791464	0.0059	0.128855
50852	TRAT1	-0.349	-0.749035	0.0059	0.128855
284697	BTBD8	0.3766	0.756951	0.006	0.129927
158401	C9orf84	-0.3808	-0.785359	0.006	0.129927
8456	FOXN1	-0.391	-0.795992	0.006	0.129927
50814	NSDHL	-0.3515	-0.752071	0.006	0.129927
81890	QTRT1	-0.3741	-0.778112	0.006	0.129927
84696	ABHD1	0.3931	0.774856	0.0061	0.129927
6868	ADAM17	0.3678	0.746908	0.0061	0.129927
27106	ARRDC2	-0.3836	-0.788326	0.0061	0.129927
653404	FOXD4L6	-0.378	-0.782356	0.0061	0.129927
3029	HAGH	-0.3614	-0.763787	0.0061	0.129927
100130932	LOC100130932	-0.3975	-0.802522	0.0061	0.129927
338799	LOC338799	-0.359	-0.760992	0.0061	0.129927
286967	NCRNA00204B	-0.34	-0.737839	0.0061	0.129927
8073	PTP4A2	0.3752	0.755376	0.0061	0.129927
6170	RPL39	-0.3871	-0.791983	0.0061	0.129927
6836	SURF4	0.3706	0.750141	0.0061	0.129927
51569	UFM1	0.3524	0.72848	0.0061	0.129927
6843	VAMP1	-0.3445	-0.743489	0.0061	0.129927
9202	ZMYM4	0.364	0.742463	0.0061	0.129927
432369	ATP5EP2	-0.3592	-0.761226	0.0062	0.130695
1289	COL5A1	0.3995	0.781486	0.0062	0.130695
84978	FRMD5	0.3874	0.768805	0.0062	0.130695
389792	IER5L	0.3553	0.732035	0.0062	0.130695
126432	RINL	-0.37472	-0.778792	0.0062	0.130695
26470	SEZ6L2	0.3539	0.730323	0.0062	0.130695
7779	SLC30A1	0.3719	0.75163	0.0062	0.130695
7546	ZIC2	-0.371	-0.774688	0.0062	0.130695
79135	APOO	-0.3895	-0.794458	0.0063	0.130781
10458	BAIAP2	-0.41694	-0.820952	0.0063	0.130781
640	BLK	-0.3764	-0.780624	0.0063	0.130781
1213	CLTC	0.3842	0.765346	0.0063	0.130781
85440	DOCK7	0.3709	0.750486	0.0063	0.130781
3003	GZMK	-0.3468	-0.746336	0.0063	0.130781
57801	HES4	0.3467	0.721378	0.0063	0.130781
100216545	LOC100216545	-0.375	-0.779098	0.0063	0.130781
440461	LOC440461	-0.4009	-0.805862	0.0063	0.130781
8935	SKAP2	0.3977	0.779639	0.0063	0.130781
9655	SOCS5	0.3844	0.765563	0.0063	0.130781
7942	TFEB	-0.362	-0.764482	0.0063	0.130781
26071	FAM127B	-0.3677	-0.770991	0.0064	0.131192
165215	FAM171B	0.348	0.723011	0.0064	0.131192
8970	HIST1H2BJ	-0.38627	-0.791121	0.0064	0.131192
253980	KCTD13	-0.3745	-0.778551	0.0064	0.131192
3965	LGALS9	-0.3463	-0.74572	0.0064	0.131192
10227	MFSD10	0.353	0.729219	0.0064	0.131192
283927	NUDT7	-0.3867	-0.791568	0.0064	0.131192
56101	PCDHGB5	0.3575	0.734705	0.0064	0.131192
7161	TP73	-0.3837	-0.788431	0.0064	0.131192
9831	ZNF623	0.3688	0.748067	0.0064	0.131192
8747	ADAM21	0.364	0.742463	0.0065	0.132577
27130	INVS	0.341	0.71412	0.0065	0.132577
83642	SELO	-0.3315	-0.726878	0.0065	0.132577
333929	SNAI3	-0.3452	-0.744358	0.0065	0.132577
60489	APOBEC3G	-0.354	-0.755076	0.0066	0.132959
821	CANX	0.3817	0.762612	0.0066	0.132959
23500	DAAM2	0.381	0.761842	0.0066	0.132959
5768	QSOX1	0.3472	0.722007	0.0066	0.132959
6196	RPS6KA2	0.3832	0.764256	0.0066	0.132959
57181	SLC39A10	0.4156	0.79741	0.0066	0.132959
6865	TACR2	-0.3686	-0.772004	0.0066	0.132959
6954	TCP11	-0.3732	-0.777123	0.0066	0.132959
91151	TIGD7	-0.3465	-0.745966	0.0066	0.132959
100131827	ZNF717	0.3389	0.711407	0.0066	0.132959
84532	ACSS1	-0.351	-0.751466	0.0067	0.134312
54874	FNBP1L	0.39047	0.772082	0.0067	0.134312
692094	MSMP	0.3628	0.741045	0.0067	0.134312
4891	SLC11A2	0.353	0.729219	0.0067	0.134312
53630	BCMO1	-0.3776	-0.781924	0.0068	0.135322
64224	HERPUD2	0.3849	0.766106	0.0068	0.135322
8863	PER3	-0.3689	-0.772341	0.0068	0.135322
5435	POLR2F	-0.345	-0.74411	0.0068	0.135322
23213	SULF1	0.3793	0.759963	0.0068	0.135322
7052	TGM2	0.4187	0.800355	0.0068	0.135322
27	ABL2	0.3874	0.768805	0.0069	0.135988
10023	FRAT1	-0.3396	-0.737331	0.0069	0.135988
4154	MBNL1	-0.3739	-0.777893	0.0069	0.135988
6920	TCEA3	-0.4094	-0.813995	0.0069	0.135988
7031	TFF1	0.341	0.71412	0.0069	0.135988
8266	UBL4A	-0.3513	-0.751829	0.0069	0.135988
64856	VWA1	0.3569	0.733979	0.0069	0.135988
84272	YIPF4	0.3597	0.737352	0.0069	0.135988
91689	C22orf32	-0.3822	-0.786847	0.007	0.136805
440193	CCDC88C	-0.337	-0.734013	0.007	0.136805
2277	FIGF	-0.36	-0.76216	0.007	0.136805
84316	LSMD1	-0.3599	-0.762044	0.007	0.136805
51257	2015-03-02	-0.365	-0.767927	0.007	0.136805
11123	RCAN3	0.374	0.75402	0.007	0.136805
84215	ZNF541	-0.3705	-0.774131	0.007	0.136805
64746	ACBD3	0.3797	0.760406	0.0071	0.13743
51660	BRP44L	-0.3482	-0.748056	0.0071	0.13743
54863	C9orf167	0.3295	0.698999	0.0071	0.13743
7184	HSP90B1	0.3833	0.764365	0.0071	0.13743
11098	PRSS23	0.3814	0.762283	0.0071	0.13743
6049	RNF6	0.3784	0.758962	0.0071	0.13743
25800	SLC39A6	0.3704	0.749912	0.0071	0.13743
9392	TGFBRAP1	0.377	0.757399	0.0071	0.13743
246	ALOX15	-0.3781	-0.782464	0.0072	0.13743
1153	CIRBP	-0.3648	-0.767699	0.0072	0.13743
160365	CLECL1	-0.3426	-0.741116	0.0072	0.13743
57511	COG6	0.3765	0.756839	0.0072	0.13743
55425	KIAA1704	0.3517	0.727616	0.0072	0.13743
9388	LIPG	0.3739	0.753907	0.0072	0.13743
51079	NDUFA13	-0.3902	-0.795175	0.0072	0.13743
26025	PCDHGA12	0.394	0.775799	0.0072	0.13743
79874	RABEP2	-0.354	-0.755076	0.0072	0.13743
22872	SEC31A	0.3357	0.707231	0.0072	0.13743
7037	TFRC	0.3246	0.692359	0.0072	0.13743
7988	ZNF212	-0.3635	-0.76621	0.0072	0.13743
3939	LDHA	0.3669	0.745861	0.0073	0.138853
6646	SOAT1	0.3738	0.753793	0.0073	0.138853
8417	STX7	0.3126	0.675591	0.0073	0.138853
8220	DGCR14	-0.3464	-0.745843	0.0074	0.13978
400954	EML6	-0.3747	-0.77877	0.0074	0.13978
643314	KIAA0754	0.3602	0.737951	0.0074	0.13978
5155	PDGFB	0.3962	0.778089	0.0074	0.13978
10758	TRAF3IP2	0.3546	0.73118	0.0074	0.13978
340348	TSPAN33	-0.3467	-0.746213	0.0074	0.13978
9703	KIAA0100	0.3735	0.753453	0.0075	0.141017
116039	OSR2	-0.3563	-0.757813	0.0075	0.141017
8495	PPFIBP2	-0.373	-0.776902	0.0075	0.141017
221035	REEP3	0.359	0.736512	0.0075	0.141017
100271715	ARHGEF33	-0.3698	-0.773349	0.0076	0.142081
1278	COL1A2	0.3711	0.750715	0.0076	0.142081
8468	FKBP6	-0.389	-0.793944	0.0076	0.142081
148808	MFSD4	-0.358	-0.759819	0.0076	0.142081
91179	SCARF2	0.3969	0.778814	0.0076	0.142081
3077	HFE	0.3705	0.750026	0.0077	0.142646
5426	POLE	-0.3678	-0.771104	0.0077	0.142646
284338	PRR19	-0.3527	-0.753517	0.0077	0.142646
5715	PSMD9	-0.3658	-0.768839	0.0077	0.142646
255758	TCTEX1D2	-0.3204	-0.711986	0.0077	0.142646
22954	TRIM32	0.3339	0.704861	0.0077	0.142646
81844	TRIM56	0.369	0.748298	0.0077	0.142646
9724	UTP14C	0.331	0.701008	0.0077	0.142646
919	CD247	-0.339	-0.736569	0.0078	0.143362
2847	MCHR1	0.3741	0.754133	0.0078	0.143362
9033	PKD2L1	-0.3533	-0.754238	0.0078	0.143362
64091	POPDC2	-0.3675	-0.770765	0.0078	0.143362
283130	SLC25A45	-0.3568	-0.758404	0.0078	0.143362
54457	TAF7L	-0.3659	-0.768953	0.0078	0.143362
7092	TLL1	0.363	0.741282	0.0078	0.143362
27042	C1orf107	0.3818	0.762722	0.0079	0.144551
65991	FUNDC2	-0.3717	-0.775465	0.0079	0.144551
3203	HOXA6	0.3464	0.721	0.0079	0.144551
389125	MUSTN1	-0.3769	-0.781167	0.0079	0.144551
64421	DCLRE1C	-0.3389	-0.736441	0.008	0.145082
3167	HMX2	-0.3833	-0.78801	0.008	0.145082
113691	MGC16703	-0.3568	-0.758404	0.008	0.145082
56105	PCDHGA11	0.3427	0.716301	0.008	0.145082
29944	PNMA3	-0.3708	-0.774465	0.008	0.145082
10084	PQBP1	-0.3518	-0.752433	0.008	0.145082
5550	PREP	0.3479	0.722886	0.008	0.145082
5789	PTPRD	0.3548	0.731425	0.008	0.145082
768	CA9	0.3478	0.72276	0.0081	0.146086
2146	EZH2	-0.38	-0.784505	0.0081	0.146086
10105	PPIF	-0.355	-0.756269	0.0081	0.146086
55676	SLC30A6	0.3439	0.717832	0.0081	0.146086
25870	SUMF2	0.341	0.71412	0.0081	0.146086
924	CD7	-0.3381	-0.735421	0.0082	0.146596
2157	F8	-0.3582	-0.760054	0.0082	0.146596
8825	LIN7A	0.3702	0.749682	0.0082	0.146596
4710	NDUFB4	-0.3392	-0.736823	0.0082	0.146596
2185	PTK2B	-0.3657	-0.768725	0.0082	0.146596
80764	THAP7	-0.3684	-0.77178	0.0082	0.146596
25963	TMEM87A	0.3337	0.704596	0.0082	0.146596
7175	TPR	0.3745	0.754586	0.0082	0.146596
282997	LOC282997	-0.358	-0.759819	0.0083	0.147578
113655	MFSD3	0.3377	0.709847	0.0083	0.147578
9601	PDIA4	0.385	0.766215	0.0083	0.147578
4068	SH2D1A	-0.3204	-0.711986	0.0083	0.147578
57583	TMEM181	0.3202	0.686294	0.0083	0.147578
55145	THAP1	0.353	0.729219	0.0084	0.148709
29766	TMOD3	0.366	0.744811	0.0084	0.148709
7532	YWHAG	0.3569	0.733979	0.0084	0.148709
253832	ZDHHC20	0.3857	0.766973	0.0084	0.148709
55702	CCDC94	-0.3658	-0.768839	0.0085	0.14967
10175	CNIH	0.3466	0.721252	0.0085	0.14967
23118	TAB2	0.3341	0.705125	0.0085	0.14967
6948	TCN2	-0.401	-0.80596	0.0085	0.14967
10548	TM9SF1	0.3705	0.750026	0.0085	0.14967
114904	C1QTNF6	0.3492	0.724512	0.0086	0.149792
92922	CCDC102A	0.3799	0.760627	0.0086	0.149792
27336	HTATSF1	-0.3369	-0.733885	0.0086	0.149792
91156	IGFN1	0.3744	0.754473	0.0086	0.149792
284441	LOC284441	0.3423	0.715789	0.0086	0.149792
4046	LSP1	-0.3121	-0.700415	0.0086	0.149792
57447	NDRG2	-0.3841	-0.788852	0.0086	0.149792
6498	SKIL	0.349	0.724262	0.0086	0.149792
6839	SUV39H1	-0.3122	-0.700556	0.0086	0.149792
8409	UXT	-0.336	-0.732728	0.0086	0.149792
242	ALOX12B	-0.3617	-0.764135	0.0087	0.149792
286257	C9orf142	-0.3815	-0.786104	0.0087	0.149792
80323	CCDC68	0.3367	0.708542	0.0087	0.149792
254228	FAM26E	0.362	0.740096	0.0087	0.149792
2200	FBN1	0.3777	0.758182	0.0087	0.149792
100125556	LOC100125556	-0.3766	-0.780841	0.0087	0.149792
283070	LOC283070	-0.3581	-0.759936	0.0087	0.149792
4651	MYO10	0.3466	0.721252	0.0087	0.149792
25903	OLFML2B	0.386	0.767297	0.0087	0.149792
6804	STX1A	0.3735	0.753453	0.0087	0.149792
200316	APOBEC3F	-0.3149	-0.704361	0.0088	0.149792
149478	BTBD19	0.3357	0.707231	0.0088	0.149792
54431	DNAJC10	0.3645	0.743051	0.0088	0.149792
58513	EPS15L1	-0.369	-0.772454	0.0088	0.149792
23704	KCNE4	0.3721	0.751859	0.0088	0.149792
54830	NUP62CL	-0.3552	-0.756507	0.0088	0.149792
5089	PBX2	0.3698	0.749221	0.0088	0.149792
645142	PPIAL4D	-0.359	-0.760992	0.0088	0.149792
25797	QPCT	0.3448	0.718976	0.0088	0.149792
201595	STT3B	0.3721	0.751859	0.0088	0.149792
445347	TARP	-0.33	-0.724904	0.0088	0.149792
7351	UCP2	-0.3575	-0.75923	0.0088	0.149792
152302	CIDECP	-0.3402	-0.738092	0.0089	0.150867
5583	PRKCH	-0.35364	-0.754645	0.0089	0.150867
6447	SCG5	0.338	0.710238	0.0089	0.150867
91419	XRCC6BP1	-0.3508	-0.751224	0.0089	0.150867
26017	FAM32A	-0.3463	-0.74572	0.009	0.151896
2664	GDI1	-0.3467	-0.746213	0.009	0.151896
90853	SPOCD1	0.3538	0.730201	0.009	0.151896
7083	TK1	-0.356	-0.757457	0.009	0.151896
10437	IFI30	-0.3221	-0.71431	0.0091	0.151896
3682	ITGAE	-0.3437	-0.742492	0.0091	0.151896
8681	JMJD7-PLA2G4B	-0.378	-0.782356	0.0091	0.151896
4041	LRP5	0.3298	0.699402	0.0091	0.151896
4291	MLF1	-0.3513	-0.751829	0.0091	0.151896
4882	NPR2	0.3421	0.715533	0.0091	0.151896
5790	PTPRCAP	-0.324	-0.716889	0.0091	0.151896
347735	SERINC2	0.3622	0.740334	0.0091	0.151896
8175	SF3A2	-0.3436	-0.742367	0.0091	0.151896
6399	TRAPPC2	-0.3492	-0.749279	0.0091	0.151896
84627	ZNF469	0.3564	0.733372	0.0091	0.151896
79647	AKIRIN1	0.3465	0.721126	0.0092	0.152014
10485	C1orf61	-0.3869	-0.791775	0.0092	0.152014
790	CAD	0.357	0.7341	0.0092	0.152014
752014	CEMP1	-0.3827	-0.787376	0.0092	0.152014
50487	PLA2G3	-0.385	-0.789795	0.0092	0.152014
23759	PPIL2	-0.346	-0.745349	0.0092	0.152014
286205	SCAI	-0.346	-0.745349	0.0092	0.152014
150737	TTC30B	0.3381	0.710368	0.0092	0.152014
25828	TXN2	-0.3501	-0.750375	0.0092	0.152014
29799	YPEL1	-0.3555	-0.756864	0.0092	0.152014
170689	ADAMTS15	0.3164	0.680979	0.0093	0.152587
27063	ANKRD1	0.36	0.737712	0.0093	0.152587
10663	CXCR6	-0.3183	-0.709094	0.0093	0.152587
3198	HOXA1	0.3546	0.73118	0.0093	0.152587
3642	INSM1	-0.3958	-0.800832	0.0093	0.152587
642852	LOC642852	0.3381	0.710368	0.0093	0.152587
22932	POMZP3	-0.362	-0.764482	0.0093	0.152587
60312	AFAP1	0.3538	0.730201	0.0094	0.153452
1427	CRYGS	-0.3982	-0.803214	0.0094	0.153452
391634	HSP90AB2P	0.3238	0.691263	0.0094	0.153452
7454	WAS	-0.3286	-0.723051	0.0094	0.153452
10144	FAM13A	0.32142	0.687985	0.0095	0.153452
50943	FOXP3	-0.3255	-0.718911	0.0095	0.153452
89890	KBTBD6	0.3548	0.731425	0.0095	0.153452
541473	LOC541473	-0.3745	-0.778551	0.0095	0.153452
5793	PTPRG	0.3922	0.77391	0.0095	0.153452
6403	SELP	-0.38995	-0.794919	0.0095	0.153452
59344	ALOXE3	-0.3651	-0.768042	0.0096	0.153452
910	CD1B	-0.398	-0.803016	0.0096	0.153452
2833	CXCR3	-0.3409	-0.738977	0.0096	0.153452
9657	IQCB1	-0.3469	-0.746459	0.0096	0.153452
197131	UBR1	0.3536	0.729956	0.0096	0.153452
51733	UPB1	-0.37069	-0.774343	0.0096	0.153452
64328	XPO4	0.3651	0.743756	0.0096	0.153452
97	ACYP1	-0.3677	-0.770991	0.0097	0.153452
1777	DNASE2	-0.357	-0.758641	0.0097	0.153452
4213	MEIS3P1	0.368	0.74714	0.0097	0.153452
51014	TMED7	0.3508	0.726502	0.0097	0.153452
11217	AKAP2	0.3744	0.754473	0.0098	0.153452
130951	C2orf65	-0.3298	-0.72464	0.0098	0.153452
6367	CCL22	-0.3241	-0.717024	0.0098	0.153452
914	CD2	-0.3106	-0.698283	0.0098	0.153452
1571	CYP2E1	-0.3729	-0.776792	0.0098	0.153452
2532	DARC	-0.363	-0.765635	0.0098	0.153452
115352	FCRL3	-0.3318	-0.727271	0.0098	0.153452
6449	SGTA	-0.3395	-0.737204	0.0098	0.153452
10245	TIMM17B	-0.3184	-0.709232	0.0098	0.153452
55858	TMEM165	0.336	0.707625	0.0098	0.153452
51738	GHRL	-0.3419	-0.740237	0.0099	0.153452
8870	IER3	0.3638	0.742227	0.0099	0.153452
10439	OLFM1	-0.347	-0.746583	0.0099	0.153452
114836	SLAMF6	-0.3114	-0.699421	0.0099	0.153452
51776	ZAK	0.375	0.755151	0.0099	0.153452
176	ACAN	0.3675	0.746559	0.01	0.153452
641371	ACOT1	-0.3414	-0.739608	0.01	0.153452
123688	AGPHD1	-0.3233	-0.715941	0.01	0.153452
80709	AKNA	-0.324	-0.716889	0.01	0.153452
83854	ANGPTL6	-0.3439	-0.742741	0.01	0.153452
148741	ANKRD35	-0.3571	-0.758759	0.01	0.153452
50636	ANO7	0.3465	0.721126	0.01	0.153452
149428	BNIPL	-0.3533	-0.754238	0.01	0.153452
284029	C17orf44	-0.3602	-0.762393	0.01	0.153452
389541	C7orf59	-0.373	-0.776902	0.01	0.153452
51759	C9orf78	-0.3213	-0.713218	0.01	0.153452
6376	CX3CL1	-0.3188	-0.709785	0.01	0.153452
3580	CXCR2P1	-0.3183	-0.709094	0.01	0.153452
2056	EPO	-0.3586	-0.760523	0.01	0.153452
26235	FBXL4	0.3581	0.735429	0.01	0.153452
115350	FCRL1	-0.3774	-0.781708	0.01	0.153452
3091	HIF1A	0.3422	0.715661	0.01	0.153452
85236	HIST1H2BK	-0.3486	-0.748546	0.01	0.153452
3206	HOXA10	0.368	0.74714	0.01	0.153452
3589	IL11	0.369	0.748298	0.01	0.153452
3593	IL12B	-0.342	-0.740363	0.01	0.153452
284348	LYPD5	-0.3731	-0.777013	0.01	0.153452
9442	MED27	-0.3336	-0.729621	0.01	0.153452
27334	P2RY10	-0.3213	-0.713218	0.01	0.153452
56099	PCDHGB7	0.3428	0.716429	0.01	0.153452
5916	RARG	-0.3726	-0.776461	0.01	0.153452
140730	RIMS4	0.3632	0.741518	0.01	0.153452
23516	SLC39A14	0.3609	0.738787	0.01	0.153452
57231	SNX14	0.3102	0.67215	0.01	0.153452
3371	TNC	0.368	0.74714	0.01	0.153452
6845	VAMP7	-0.3347	-0.731049	0.01	0.153452
51087	YBX2	-0.327	-0.72092	0.01	0.153452
115196	ZNF554	-0.355	-0.756269	0.01	0.153452
9744	ACAP1	-0.3128	-0.701405	0.011	0.160087
56999	ADAMTS9	0.3718	0.751516	0.011	0.160087
347902	AMIGO2	0.3487	0.723887	0.011	0.160087
308	ANXA5	0.3378	0.709977	0.011	0.160087
79642	ARSJ	0.3584	0.735791	0.011	0.160087
439	ASNA1	-0.3568	-0.758404	0.011	0.160087
56935	C11orf75	-0.3415	-0.739734	0.011	0.160087
283651	C15orf21	-0.3413	-0.739482	0.011	0.160087
54094	C21orf15	-0.3758	-0.779971	0.011	0.160087
54862	CC2D1A	-0.3698	-0.773349	0.011	0.160087
57639	CCDC146	-0.3554	-0.756745	0.011	0.160087
60492	CCDC90B	0.3508	0.726502	0.011	0.160087
908	CCT6A	0.3424	0.715917	0.011	0.160087
1043	CD52	-0.3138	-0.702815	0.011	0.160087
84303	CHCHD6	-0.3577	-0.759466	0.011	0.160087
25932	CLIC4	0.349	0.724262	0.011	0.160087
150384	CN5H6.4	-0.3679	-0.771217	0.011	0.160087
1653	DDX1	0.361	0.738906	0.011	0.160087
133584	EGFLAM	0.3843	0.765455	0.011	0.160087
8637	EIF4EBP3	-0.346	-0.745349	0.011	0.160087
2029	ENSA	-0.3325	-0.728187	0.011	0.160087
2098	ESD	0.358	0.735309	0.011	0.160087
115572	FAM46B	-0.3475	-0.747198	0.011	0.160087
55711	FAR2	0.3684	0.747604	0.011	0.160087
51661	FKBP7	0.3825	0.76349	0.011	0.160087
23401	FRAT2	-0.3613	-0.763671	0.011	0.160087
8880	FUBP1	0.3605	0.73831	0.011	0.160087
221092	HNRNPUL2	0.339	0.711537	0.011	0.160087
10068	IL18BP	-0.32	-0.711437	0.011	0.160087
126298	IRGQ	-0.3298	-0.72464	0.011	0.160087
3669	ISG20	-0.3724	-0.77624	0.011	0.160087
343450	KCNT2	0.3808	0.761622	0.011	0.160087
3978	LIG1	-0.333	-0.72884	0.011	0.160087
80774	LIMD2	-0.3402	-0.738092	0.011	0.160087
55777	MBD5	0.3337	0.704596	0.011	0.160087
4298	MLLT1	-0.3369	-0.733885	0.011	0.160087
8898	MTMR2	0.357	0.7341	0.011	0.160087
259232	NALCN	0.3753	0.755489	0.011	0.160087
23057	NMNAT2	0.3737	0.75368	0.011	0.160087
126147	NTN5	-0.3273	-0.721321	0.011	0.160087
51604	PIGT	0.3589	0.736392	0.011	0.160087
5900	RALGDS	-0.3096	-0.696855	0.011	0.160087
5920	RARRES3	-0.3317	-0.72714	0.011	0.160087
6338	SCNN1B	-0.3615	-0.763903	0.011	0.160087
6402	SELL	-0.3208	-0.712534	0.011	0.160087
8910	SGCE	0.354	0.730446	0.011	0.160087
84174	SLA2	-0.3261	-0.719716	0.011	0.160087
735301	SNHG9	-0.3445	-0.743489	0.011	0.160087
9751	SNPH	0.3452	0.719483	0.011	0.160087
6709	SPTAN1	0.3611	0.739026	0.011	0.160087
6818	SULT1A3	-0.3095	-0.696712	0.011	0.160087
7077	TIMP2	0.36	0.737712	0.011	0.160087
64129	TINAGL1	0.3305	0.70034	0.011	0.160087
54499	TMCO1	0.329	0.698327	0.011	0.160087
54765	TRIM44	0.3519	0.727863	0.011	0.160087
7386	UQCRFS1	-0.3475	-0.747198	0.011	0.160087
23038	WDTC1	-0.3256	-0.719045	0.011	0.160087
57507	ZNF608	0.334	0.704993	0.011	0.160087
55347	ABHD10	-0.3699	-0.773461	0.012	0.167631
79722	ANKRD55	-0.3665	-0.769634	0.012	0.167631
79002	C19orf43	-0.3492	-0.749279	0.012	0.167631
27099	C7orf54	-0.3368	-0.733757	0.012	0.167631
915	CD3D	-0.3062	-0.691958	0.012	0.167631
995	CDC25C	-0.3563	-0.757813	0.012	0.167631
1193	CLIC2	-0.3066	-0.692538	0.012	0.167631
1337	COX6A1	-0.3423	-0.74074	0.012	0.167631
200407	CREG2	0.3478	0.72276	0.012	0.167631
1506	CTRL	-0.3385	-0.735932	0.012	0.167631
957	ENTPD5	0.3083	0.669405	0.012	0.167631
2053	EPHX2	-0.2982	-0.680181	0.012	0.167631
2081	ERN1	0.3301	0.699804	0.012	0.167631
2191	FAP	0.3445	0.718595	0.012	0.167631
9638	FEZ1	0.3486	0.723762	0.012	0.167631
2297	FOXD1	-0.3115	-0.699563	0.012	0.167631
3202	HOXA5	0.336	0.707625	0.012	0.167631
3695	ITGB7	-0.333	-0.72884	0.012	0.167631
8690	JRKL	0.3467	0.721378	0.012	0.167631
23078	KIAA0564	0.3679	0.747024	0.012	0.167631
84769	MPV17L2	-0.3368	-0.733757	0.012	0.167631
55167	MSL2	-0.3231	-0.71567	0.012	0.167631
64428	NARFL	-0.3635	-0.76621	0.012	0.167631
4696	NDUFA3	-0.377	-0.781275	0.012	0.167631
4814	NINJ1	-0.3102	-0.697712	0.012	0.167631
10896	OCLM	0.3389	0.711407	0.012	0.167631
26167	PCDHB5	0.3755	0.755714	0.012	0.167631
56100	PCDHGB6	0.3427	0.716301	0.012	0.167631
51365	PLA1A	-0.317	-0.707292	0.012	0.167631
648791	PPP1R3G	0.3252	0.693178	0.012	0.167631
78994	PRR14	-0.327	-0.72092	0.012	0.167631
8000	PSCA	-0.327	-0.72092	0.012	0.167631
5738	PTGFRN	0.3455	0.719863	0.012	0.167631
5743	PTGS2	0.369	0.748298	0.012	0.167631
5878	RAB5C	0.3705	0.750026	0.012	0.167631
6322	SCML1	-0.3152	-0.704781	0.012	0.167631
256380	SCML4	-0.3117	-0.699847	0.012	0.167631
9728	SECISBP2L	0.3485	0.723637	0.012	0.167631
2030	SLC29A1	0.3188	0.684344	0.012	0.167631
81893	SLC7A5P1	0.3452	0.719483	0.012	0.167631
64420	SUSD1	0.3366	0.708411	0.012	0.167631
6911	TBX6	-0.3446	-0.743613	0.012	0.167631
8794	TNFRSF10C	0.3362	0.707887	0.012	0.167631
348825	TPRXL	-0.3491	-0.749157	0.012	0.167631
1831	TSC22D3	-0.3198	-0.711162	0.012	0.167631
374666	WASH3P	-0.3378	-0.735038	0.012	0.167631
163255	ZNF540	-0.322	-0.714174	0.012	0.167631
7965	AIMP2	0.353	0.729219	0.013	0.17205
238	ALK	-0.3409	-0.738977	0.013	0.17205
88455	ANKRD13A	-0.3496	-0.749766	0.013	0.17205
64411	ARAP3	0.3388	0.711277	0.013	0.17205
93663	ARHGAP18	0.3225	0.689476	0.013	0.17205
409	ARRB2	-0.3423	-0.74074	0.013	0.17205
374569	ASPG	-0.3439	-0.742741	0.013	0.17205
51398	C19orf56	-0.3367	-0.733628	0.013	0.17205
5199	CFP	-0.3482	-0.748056	0.013	0.17205
1592	CYP26A1	-0.333	-0.72884	0.013	0.17205
79016	DDA1	-0.3317	-0.72714	0.013	0.17205
10212	DDX39	-0.351	-0.751466	0.013	0.17205
1665	DHX15	0.3265	0.694948	0.013	0.17205
10301	DLEU1	0.3444	0.718468	0.013	0.17205
10570	DPYSL4	0.3645	0.743051	0.013	0.17205
9780	FAM38A	0.3378	0.709977	0.013	0.17205
2643	GCH1	-0.3264	-0.720118	0.013	0.17205
55559	HAUS7	-0.3382	-0.735549	0.013	0.17205
3069	HDLBP	0.3526	0.728726	0.013	0.17205
388585	HES5	-0.3234	-0.716076	0.013	0.17205
10808	HSPH1	0.3393	0.711925	0.013	0.17205
27345	KCNMB4	0.333	0.70367	0.013	0.17205
151174	LOC151174	-0.3378	-0.735038	0.013	0.17205
90668	LRRC16B	-0.3228	-0.715262	0.013	0.17205
7798	LUZP1	0.3278	0.696709	0.013	0.17205
6885	MAP3K7	0.3474	0.722258	0.013	0.17205
23195	MDN1	0.3311	0.701142	0.013	0.17205
9019	MPZL1	0.3362	0.707887	0.013	0.17205
4923	NTSR1	0.3609	0.738787	0.013	0.17205
55270	NUDT15	0.343	0.716684	0.013	0.17205
200931	OSTalpha	-0.3329	-0.728709	0.013	0.17205
56107	PCDHGA9	0.3613	0.739264	0.013	0.17205
51050	PI15	0.3638	0.742227	0.013	0.17205
54872	PIGG	0.3299	0.699536	0.013	0.17205
23275	POFUT2	0.3312	0.701275	0.013	0.17205
55771	PRR11	0.3394	0.712055	0.013	0.17205
5803	PTPRZ1	-0.3351	-0.731566	0.013	0.17205
57786	RBAK	0.3398	0.712572	0.013	0.17205
55920	RCC2	-0.337	-0.734013	0.013	0.17205
266747	RGL4	-0.3143	-0.703519	0.013	0.17205
81847	RNF146	0.326	0.694268	0.013	0.17205
950	SCARB2	0.366	0.744811	0.013	0.17205
151011	2015-09-10	0.3438	0.717705	0.013	0.17205
6478	SIAH2	-0.3138	-0.702815	0.013	0.17205
27127	SMC1B	-0.3548	-0.756031	0.013	0.17205
51188	SS18L2	-0.3148	-0.70422	0.013	0.17205
8636	SSNA1	-0.3354	-0.731954	0.013	0.17205
10610	ST6GALNAC2	-0.3698	-0.773349	0.013	0.17205
26228	STAP1	-0.327	-0.72092	0.013	0.17205
6950	TCP1	0.3448	0.718976	0.013	0.17205
201633	TIGIT	-0.3024	-0.686409	0.013	0.17205
26022	TMEM98	0.3457	0.720116	0.013	0.17205
10906	TRAFD1	-0.3334	-0.729361	0.013	0.17205
11219	TREX2	-0.3354	-0.731954	0.013	0.17205
90121	TSR2	-0.3405	-0.738472	0.013	0.17205
10383	TUBB2C	-0.33	-0.724904	0.013	0.17205
84993	UBL7	-0.3157	-0.70548	0.013	0.17205
10868	USP20	-0.3393	-0.73695	0.013	0.17205
55697	VAC14	-0.3339	-0.730011	0.013	0.17205
1462	VCAN	0.3621	0.740215	0.013	0.17205
7450	VWF	0.3455	0.719863	0.013	0.17205
348793	WDR53	-0.3141	-0.703238	0.013	0.17205
284273	ZADH2	-0.3337	-0.729751	0.013	0.17205
7772	ZNF229	0.36	0.737712	0.013	0.17205
23036	ZNF292	0.34399	0.717947	0.013	0.17205
55109	AGGF1	0.3363	0.708018	0.014	0.17698
8659	ALDH4A1	-0.32	-0.711437	0.014	0.17698
23452	ANGPTL2	0.3301	0.699804	0.014	0.17698
23520	ANP32C	-0.35745	-0.759171	0.014	0.17698
51309	ARMCX1	0.3337	0.704596	0.014	0.17698
537	ATP6AP1	-0.328	-0.722254	0.014	0.17698
9274	BCL7C	-0.3737	-0.777673	0.014	0.17698
55909	BIN3	-0.3289	-0.723449	0.014	0.17698
91978	C19orf20	0.3296	0.699133	0.014	0.17698
541578	CXorf40B	-0.3239	-0.716753	0.014	0.17698
1741	DLG3	-0.3223	-0.714582	0.014	0.17698
1942	EFNA1	0.3493	0.724636	0.014	0.17698
55250	ELP2	0.3517	0.727616	0.014	0.17698
2010	EMD	-0.3481	-0.747934	0.014	0.17698
51513	ETV7	-0.3336	-0.729621	0.014	0.17698
26205	GMEB2	-0.3117	-0.699847	0.014	0.17698
79581	GPR172A	0.3447	0.718849	0.014	0.17698
23421	ITGB3BP	-0.3213	-0.713218	0.014	0.17698
222658	KCTD20	0.3437	0.717577	0.014	0.17698
27040	LAT	-0.2981	-0.680032	0.014	0.17698
26119	LDLRAP1	-0.333	-0.72884	0.014	0.17698
284578	LOC284578	-0.3614	-0.763787	0.014	0.17698
81543	LRRC3	0.332	0.702341	0.014	0.17698
219972	MPEG1	-0.3092	-0.696282	0.014	0.17698
744	MPPED2	-0.3446	-0.743613	0.014	0.17698
256236	NAPSB	-0.3309	-0.72609	0.014	0.17698
4835	NQO2	-0.3189	-0.709923	0.014	0.17698
79873	NUDT18	-0.3359	-0.732599	0.014	0.17698
51248	PDZD11	-0.3308	-0.725958	0.014	0.17698
8799	PEX11B	-0.325	-0.718238	0.014	0.17698
196463	PLBD2	0.348	0.723011	0.014	0.17698
122618	PLD4	-0.3118	-0.699989	0.014	0.17698
5451	POU2F1	-0.353	-0.753878	0.014	0.17698
5781	PTPN11	0.315	0.679002	0.014	0.17698
5778	PTPN7	-0.3072	-0.693405	0.014	0.17698
9232	PTTG1	-0.3375	-0.734654	0.014	0.17698
283349	RASSF3	0.341	0.71412	0.014	0.17698
83593	RASSF5	-0.317	-0.707292	0.014	0.17698
7737	RNF113A	-0.3268	-0.720653	0.014	0.17698
285855	RPL7L1	0.3309	0.700874	0.014	0.17698
23034	SAMD4A	0.3553	0.732035	0.014	0.17698
10993	SDS	-0.323	-0.715534	0.014	0.17698
8293	SERF1A	-0.3494	-0.749523	0.014	0.17698
81537	SGPP1	0.3498	0.725259	0.014	0.17698
26503	SLC17A5	0.3099	0.671718	0.014	0.17698
399512	SLC25A35	-0.338	-0.735294	0.014	0.17698
81031	SLC2A10	0.3153	0.679427	0.014	0.17698
10479	SLC9A6	-0.314	-0.703097	0.014	0.17698
125058	TBC1D16	0.3187	0.684205	0.014	0.17698
3196	TLX2	-0.3497	-0.749888	0.014	0.17698
201931	TMEM192	0.3123	0.675162	0.014	0.17698
3842	TNPO1	0.3135	0.676873	0.014	0.17698
65267	WNK3	-0.3356	-0.732212	0.014	0.17698
22803	XRN2	0.3402	0.713089	0.014	0.17698
55063	ZCWPW1	-0.339	-0.736569	0.014	0.17698
55954	ZMAT5	-0.3261	-0.719716	0.014	0.17698
121274	ZNF641	0.3204	0.686572	0.014	0.17698
339500	ZNF678	0.325	0.692905	0.014	0.17698
218	ALDH3A1	-0.356	-0.757457	0.015	0.182431
118429	ANTXR2	0.332	0.702341	0.015	0.182431
360	AQP3	-0.3298	-0.72464	0.015	0.182431
466	ATF1	0.3186	0.684065	0.015	0.182431
9474	ATG5	0.2989	0.655555	0.015	0.182431
483	ATP1B3	-0.3316	-0.727009	0.015	0.182431
112849	C14orf149	0.3387	0.711148	0.015	0.182431
116028	C16orf75	-0.3391	-0.736696	0.015	0.182431
84226	C2orf16	0.3224	0.689339	0.015	0.182431
84657	C3orf42	-0.306	-0.691668	0.015	0.182431
387263	C6orf120	0.3008	0.658391	0.015	0.182431
830	CAPZA2	0.3061	0.666204	0.015	0.182431
9720	CCDC144A	0.3386	0.711018	0.015	0.182431
962	CD48	-0.2837	-0.657909	0.015	0.182431
10423	CDIPT	-0.3174	-0.707847	0.015	0.182431
284040	CDRT4	-0.3424	-0.740865	0.015	0.182431
9575	CLOCK	0.3463	0.720873	0.015	0.182431
1345	COX6C	-0.343	-0.741617	0.015	0.182431
1615	DARS	0.3378	0.709977	0.015	0.182431
8525	DGKZ	-0.322	-0.714174	0.015	0.182431
1793	DOCK1	0.3197	0.685599	0.015	0.182431
1846	DUSP4	0.3596	0.737233	0.015	0.182431
1956	EGFR	0.3325	0.703006	0.015	0.182431
162427	FAM134C	-0.3343	-0.73053	0.015	0.182431
115557	GEFT	0.34	0.712831	0.015	0.182431
8479	HIRIP3	-0.3434	-0.742117	0.015	0.182431
3097	HIVEP2	0.3442	0.718214	0.015	0.182431
91749	KIAA1919	0.2907	0.6431	0.015	0.182431
89857	KLHL6	-0.305	-0.690214	0.015	0.182431
441208	LOC441208	0.3273	0.696032	0.015	0.182431
8076	MFAP5	0.3232	0.69044	0.015	0.182431
114130	MGC16384	0.3339	0.704861	0.015	0.182431
91977	MYOZ3	0.331	0.701008	0.015	0.182431
10135	NAMPT	0.3541	0.730568	0.015	0.182431
55916	NXT2	-0.332	-0.727533	0.015	0.182431
8481	OFD1	-0.3393	-0.73695	0.015	0.182431
57575	PCDH10	0.3823	0.763271	0.015	0.182431
56108	PCDHGA7	0.3017	0.659728	0.015	0.182431
5368	PNOC	-0.3314	-0.726747	0.015	0.182431
26051	PPP1R16B	-0.3291	-0.723714	0.015	0.182431
5638	PRRG1	0.3093	0.670852	0.015	0.182431
137902	PXDNL	0.3342	0.705257	0.015	0.182431
64062	RBM26	0.329	0.698327	0.015	0.182431
64218	SEMA4A	-0.334	-0.730141	0.015	0.182431
6541	SLC7A1	0.353	0.729219	0.015	0.182431
6678	SPARC	0.3378	0.709977	0.015	0.182431
3925	STMN1	-0.345	-0.74411	0.015	0.182431
57551	TAOK1	0.3271	0.695761	0.015	0.182431
55161	TMEM33	0.3087	0.669984	0.015	0.182431
252839	TMEM9	0.3377	0.709847	0.015	0.182431
55737	VPS35	0.31	0.671862	0.015	0.182431
57182	ANKRD50	0.3157	0.679992	0.016	0.187619
22809	ATF5	-0.282	-0.655219	0.016	0.187619
84915	C12orf34	-0.293	-0.672332	0.016	0.187619
91574	C12orf65	-0.341	-0.739103	0.016	0.187619
283897	C16orf54	-0.3068	-0.692827	0.016	0.187619
401115	C4orf48	0.31	0.671862	0.016	0.187619
201134	CCDC46	0.3106	0.672725	0.016	0.187619
6347	CCL2	0.3252	0.693178	0.016	0.187619
951	CD37	-0.29	-0.667734	0.016	0.187619
55636	CHD7	0.328	0.696979	0.016	0.187619
643	CXCR5	-0.3021	-0.685967	0.016	0.187619
23333	DPY19L1	0.3448	0.718976	0.016	0.187619
1840	DTX1	-0.3367	-0.733628	0.016	0.187619
253152	EPHX4	0.356	0.732887	0.016	0.187619
2132	EXT2	0.3234	0.690714	0.016	0.187619
2153	F5	-0.3084	-0.695134	0.016	0.187619
51011	FAHD2A	-0.33514	-0.731618	0.016	0.187619
168537	GIMAP7	-0.3069	-0.692972	0.016	0.187619
192286	HIGD2A	-0.3214	-0.713355	0.016	0.187619
3481	IGF2	0.3338	0.704729	0.016	0.187619
3777	KCNK3	0.3068	0.667225	0.016	0.187619
3786	KCNQ3	0.3363	0.708018	0.016	0.187619
3998	LMAN1	0.3506	0.726254	0.016	0.187619
84057	MND1	-0.3208	-0.712534	0.016	0.187619
4628	MYH10	0.322	0.688787	0.016	0.187619
4707	NDUFB1	-0.3711	-0.774799	0.016	0.187619
4837	NNMT	0.3417	0.71502	0.016	0.187619
23117	NPIPL3	-0.3263	-0.719984	0.016	0.187619
50863	NTM	0.3179	0.683086	0.016	0.187619
149420	PDIK1L	-0.3526	-0.753397	0.016	0.187619
5210	PFKFB4	0.327	0.695626	0.016	0.187619
5281	PIGF	0.3255	0.693587	0.016	0.187619
5291	PIK3CB	-0.3499	-0.750131	0.016	0.187619
29992	PILRA	-0.3023	-0.686262	0.016	0.187619
10687	PNMA2	0.306	0.666058	0.016	0.187619
5777	PTPN6	-0.3147	-0.70408	0.016	0.187619
84236	RHBDD1	0.3024	0.660765	0.016	0.187619
89970	RSPRY1	0.3309	0.700874	0.016	0.187619
113402	SFT2D1	0.3098	0.671574	0.016	0.187619
64744	SMAP2	-0.3041	-0.688901	0.016	0.187619
6732	SRPK1	0.3366	0.708411	0.016	0.187619
6764	ST5	0.3428	0.716429	0.016	0.187619
8803	SUCLA2	0.313	0.676161	0.016	0.187619
26608	TBL2	0.3578	0.735067	0.016	0.187619
23043	TNIK	0.356	0.732887	0.016	0.187619
60385	TSKS	-0.332	-0.727533	0.016	0.187619
84460	ZMAT1	-0.3444	-0.743364	0.016	0.187619
7775	ZNF232	-0.3415	-0.739734	0.016	0.187619
285349	ZNF660	0.3534	0.72971	0.016	0.187619
55762	ZNF701	0.3273	0.696032	0.016	0.187619
11215	AKAP11	0.3067	0.66708	0.017	0.19258
120425	AMICA1	-0.2898	-0.667425	0.017	0.19258
305	ANXA2P3	-0.3129	-0.701546	0.017	0.19258
200315	APOBEC3A	-0.3038	-0.688463	0.017	0.19258
51665	ASB1	0.3179	0.683086	0.017	0.19258
2683	B4GALT1	0.3575	0.734705	0.017	0.19258
2647	BLOC1S1	-0.3276	-0.721721	0.017	0.19258
10974	C10orf116	-0.2963	-0.677331	0.017	0.19258
56941	C3orf37	-0.317	-0.707292	0.017	0.19258
157777	C8orf45	-0.3395	-0.737204	0.017	0.19258
835	CASP2	-0.3127	-0.701264	0.017	0.19258
892	CCNC	0.2977	0.653754	0.017	0.19258
27141	CIDEB	-0.3426	-0.741116	0.017	0.19258
1292	COL6A2	0.3357	0.707231	0.017	0.19258
28960	DCPS	-0.3325	-0.728187	0.017	0.19258
27147	DENND2A	0.3291	0.698461	0.017	0.19258
192669	EIF2C3	0.3355	0.706969	0.017	0.19258
27335	EIF3K	-0.336	-0.732728	0.017	0.19258
9214	FAIM3	-0.3018	-0.685525	0.017	0.19258
84498	FAM120B	0.3319	0.702208	0.017	0.19258
401145	FAM190A	0.3059	0.665912	0.017	0.19258
23403	FBXO46	-0.3183	-0.709094	0.017	0.19258
29109	FHOD1	0.3255	0.693587	0.017	0.19258
2535	FZD2	0.3223	0.689201	0.017	0.19258
10014	HDAC5	-0.349	-0.749035	0.017	0.19258
9456	HOMER1	0.3167	0.681401	0.017	0.19258
79711	IPO4	0.3397	0.712443	0.017	0.19258
9858	KIAA0649	0.3234	0.690714	0.017	0.19258
100128191	LOC100128191	-0.326	-0.719582	0.017	0.19258
64101	LRRC4	-0.2884	-0.66526	0.017	0.19258
4430	MYO1B	0.3483	0.723387	0.017	0.19258
10003	NAALAD2	0.3138	0.6773	0.017	0.19258
100287569	NCRNA00173	-0.3218	-0.713901	0.017	0.19258
9520	NPEPPS	0.339	0.711537	0.017	0.19258
4521	NUDT1	-0.318	-0.708679	0.017	0.19258
55486	PARL	-0.302	-0.68582	0.017	0.19258
56102	PCDHGB3	0.3083	0.669405	0.017	0.19258
5158	PDE6B	-0.3372	-0.73427	0.017	0.19258
5437	POLR2H	-0.3276	-0.721721	0.017	0.19258
5990	RFX2	-0.315	-0.704501	0.017	0.19258
4919	ROR1	0.3348	0.706048	0.017	0.19258
54913	RPP25	-0.3363	-0.733114	0.017	0.19258
6404	SELPLG	-0.3123	-0.700698	0.017	0.19258
55423	SIRPG	-0.2979	-0.679732	0.017	0.19258
30837	SOCS7	0.3281	0.697114	0.017	0.19258
79987	SVEP1	0.326	0.694268	0.017	0.19258
55751	TMEM184C	0.3194	0.685181	0.017	0.19258
79230	ZNF557	-0.3076	-0.693982	0.017	0.19258
79149	ZSCAN5A	-0.3224	-0.714718	0.017	0.19258
51129	ANGPTL4	0.3485	0.723637	0.018	0.197216
571	BACH1	0.3315	0.701675	0.018	0.197216
148223	C19orf25	-0.324	-0.716889	0.018	0.197216
29086	C19orf62	-0.3202	-0.711712	0.018	0.197216
375341	C3orf62	-0.3033	-0.68773	0.018	0.197216
10367	CBARA1	-0.3141	-0.703238	0.018	0.197216
904	CCNT1	0.2971	0.652851	0.018	0.197216
80321	CEP70	-0.3172	-0.70757	0.018	0.197216
79645	EFCAB1	-0.3173	-0.707708	0.018	0.197216
8893	EIF2B5	-0.3376	-0.734782	0.018	0.197216
2048	EPHB2	0.3299	0.699536	0.018	0.197216
51466	EVL	-0.29	-0.667734	0.018	0.197216
27022	FOXD3	-0.3133	-0.702111	0.018	0.197216
11337	GABARAP	-0.3193	-0.710474	0.018	0.197216
2702	GJA5	0.3663	0.745161	0.018	0.197216
9402	GRAP2	-0.3136	-0.702534	0.018	0.197216
54919	HEATR2	0.302	0.660172	0.018	0.197216
3603	IL16	-0.2879	-0.664484	0.018	0.197216
3663	IRF5	-0.3498	-0.75001	0.018	0.197216
346689	KLRG2	-0.319	-0.710061	0.018	0.197216
64130	LIN7B	-0.318	-0.708679	0.018	0.197216
5605	MAP2K2	-0.314	-0.703097	0.018	0.197216
23031	MAST3	-0.3353	-0.731825	0.018	0.197216
4775	NFATC3	-0.3129	-0.701546	0.018	0.197216
80896	NPL	-0.3256	-0.719045	0.018	0.197216
56114	PCDHGA1	0.2944	0.648763	0.018	0.197216
5501	PPP1CC	-0.3368	-0.733757	0.018	0.197216
79660	PPP1R3B	0.3367	0.708542	0.018	0.197216
283659	PRTG	0.342	0.715405	0.018	0.197216
100101490	PSIMCT-1	0.313	0.676161	0.018	0.197216
7803	PTP4A1	0.3379	0.710108	0.018	0.197216
5801	PTPRR	0.319	0.684623	0.018	0.197216
6001	RGS10	-0.3007	-0.6839	0.018	0.197216
158787	RIBC1	-0.3333	-0.729231	0.018	0.197216
9403	2015-09-15	0.3109	0.673156	0.018	0.197216
9792	SERTAD2	-0.3409	-0.738977	0.018	0.197216
440044	SLC22A20	-0.2985	-0.680629	0.018	0.197216
139065	SLITRK4	0.3296	0.699133	0.018	0.197216
56916	SMARCAD1	0.3339	0.704861	0.018	0.197216
10910	SUGT1	0.3119	0.67459	0.018	0.197216
6938	TCF12	0.3198	0.685738	0.018	0.197216
7343	UBTF	-0.3127	-0.701264	0.018	0.197216
51377	UCHL5	0.3294	0.698865	0.018	0.197216
253769	WDR27	0.2964	0.651795	0.018	0.197216
123720	WHAMM	-0.3098	-0.697141	0.018	0.197216
463	ZFHX3	0.3235	0.690852	0.018	0.197216
257101	ZNF683	-0.2978	-0.679583	0.018	0.197216
79943	ZNF696	0.3396	0.712314	0.018	0.197216
221584	ZSCAN12P1	0.3106	0.672725	0.018	0.197216
122416	ANKRD9	0.3076	0.668389	0.019	0.201166
162	AP1B1	-0.2915	-0.670039	0.019	0.201166
604	BCL6	-0.328	-0.722254	0.019	0.201166
91653	BOC	-0.3009	-0.684196	0.019	0.201166
80209	C13orf23	0.314	0.677584	0.019	0.201166
148523	C1orf51	-0.3196	-0.710887	0.019	0.201166
150383	C22orf40	-0.3397	-0.737458	0.019	0.201166
140947	C5orf20	-0.2951	-0.67552	0.019	0.201166
389643	C8orf80	-0.3007	-0.6839	0.019	0.201166
158067	C9orf98	-0.3154	-0.705061	0.019	0.201166
966	CD59	0.3323	0.70274	0.019	0.201166
925	CD8A	-0.2932	-0.672637	0.019	0.201166
10523	CHERP	-0.3212	-0.713082	0.019	0.201166
25978	CHMP2B	0.3091	0.670563	0.019	0.201166
196513	DCP1B	0.2852	0.634551	0.019	0.201166
11080	DNAJB4	0.2962	0.651492	0.019	0.201166
100129396	FAM106C	0.33041	0.700219	0.019	0.201166
56975	FAM20C	0.3019	0.660024	0.019	0.201166
2232	FDXR	-0.333	-0.72884	0.019	0.201166
2331	FMOD	0.329	0.698327	0.019	0.201166
2768	GNA12	0.3033	0.662094	0.019	0.201166
29909	GPR171	-0.295	-0.675369	0.019	0.201166
84439	HHIPL1	0.3092	0.670708	0.019	0.201166
8091	HMGA2	0.3106	0.672725	0.019	0.201166
64711	HS3ST6	-0.3329	-0.728709	0.019	0.201166
84056	KATNAL1	0.3231	0.690302	0.019	0.201166
221458	KIF6	0.3344	0.705521	0.019	0.201166
283212	KLHL35	-0.3359	-0.732599	0.019	0.201166
11282	MGAT4B	0.3067	0.66708	0.019	0.201166
9612	NCOR2	0.369	0.748298	0.019	0.201166
283932	NCRNA00095	0.332	0.702341	0.019	0.201166
4712	NDUFB6	-0.3228	-0.715262	0.019	0.201166
84876	ORAI1	-0.32499	-0.718224	0.019	0.201166
55593	OTUD5	-0.2913	-0.669733	0.019	0.201166
196743	PAOX	-0.3051	-0.69036	0.019	0.201166
56103	PCDHGB2	0.3109	0.673156	0.019	0.201166
5134	PDCD2	0.3136	0.677016	0.019	0.201166
7001	PRDX2	-0.3167	-0.706874	0.019	0.201166
6199	RPS6KB2	-0.30841	-0.695148	0.019	0.201166
10512	SEMA3C	0.3071	0.667662	0.019	0.201166
989	2015-09-07	0.321	0.687404	0.019	0.201166
54414	SIAE	0.3082	0.66926	0.019	0.201166
201305	SPNS3	-0.315	-0.704501	0.019	0.201166
10963	STIP1	0.3472	0.722007	0.019	0.201166
6999	TDO2	0.304	0.663125	0.019	0.201166
7980	TFPI2	0.3338	0.704729	0.019	0.201166
23554	TSPAN12	0.2972	0.653001	0.019	0.201166
64061	TSPYL2	-0.3041	-0.688901	0.019	0.201166
56886	UGGT1	0.3155	0.679709	0.019	0.201166
284403	WDR62	-0.293	-0.672332	0.019	0.201166
56949	XAB2	-0.3113	-0.699279	0.019	0.201166
57567	ZNF319	0.3215	0.688096	0.019	0.201166
29880	ALG5	0.3046	0.664007	0.02	0.205374
280	AMY2B	-0.3092	-0.696282	0.02	0.205374
115703	ARHGAP33	-0.3278	-0.721987	0.02	0.205374
9212	AURKB	-0.3272	-0.721187	0.02	0.205374
147685	C19orf18	-0.3488	-0.74879	0.02	0.205374
94032	CAMK2N2	-0.3084	-0.695134	0.02	0.205374
92558	CCDC64	-0.3109	-0.69871	0.02	0.205374
921	CD5	-0.2959	-0.676728	0.02	0.205374
1082	CGB	0.3174	0.682385	0.02	0.205374
2919	CXCL1	0.3169	0.681682	0.02	0.205374
257203	DSCR9	-0.3281	-0.722387	0.02	0.205374
2052	EPHX1	-0.3031	-0.687437	0.02	0.205374
11170	FAM107A	-0.3122	-0.700556	0.02	0.205374
159091	FAM122C	-0.3138	-0.702815	0.02	0.205374
780776	FAM18A	-0.328	-0.722254	0.02	0.205374
83723	FAM57B	-0.3005	-0.683604	0.02	0.205374
283431	GAS2L3	0.3066	0.666934	0.02	0.205374
2639	GCDH	-0.2801	-0.652193	0.02	0.205374
57476	GRAMD1B	0.3168	0.681542	0.02	0.205374
51668	HSPB11	-0.3062	-0.691958	0.02	0.205374
79663	HSPBAP1	-0.3313	-0.726615	0.02	0.205374
339451	KLHL17	0.3252	0.693178	0.02	0.205374
338785	KRT79	-0.3403	-0.738219	0.02	0.205374
3902	LAG3	-0.2967	-0.677933	0.02	0.205374
3918	LAMC2	0.334	0.704993	0.02	0.205374
100271836	LOC100271836	0.318	0.683226	0.02	0.205374
388796	LOC388796	-0.317	-0.707292	0.02	0.205374
729176	LOC729176	0.302	0.660172	0.02	0.205374
83742	MARVELD1	0.3146	0.678436	0.02	0.205374
4488	MSX2	0.2894	0.641094	0.02	0.205374
55967	NDUFA12	-0.3069	-0.692972	0.02	0.205374
4778	NFE2	0.306	0.666058	0.02	0.205374
64805	P2RY12	-0.3213	-0.713218	0.02	0.205374
5625	PRODH	-0.3347	-0.731049	0.02	0.205374
149628	PYHIN1	-0.291	-0.669272	0.02	0.205374
8498	RANBP3	-0.3124	-0.700839	0.02	0.205374
91252	SLC39A13	0.3128	0.675876	0.02	0.205374
23657	SLC7A11	0.3063	0.666496	0.02	0.205374
6717	SRI	0.2928	0.646323	0.02	0.205374
6832	SUPV3L1	-0.3003	-0.683307	0.02	0.205374
26136	TES	0.3189	0.684484	0.02	0.205374
7046	TGFBR1	0.3152	0.679285	0.02	0.205374
117854	TRIM6	0.355	0.731669	0.02	0.205374
378108	TRIM74	-0.3314	-0.726747	0.02	0.205374
147645	VSIG10L	-0.3521	-0.752795	0.02	0.205374
11193	WBP4	0.3009	0.65854	0.02	0.205374
57705	WDFY4	-0.2953	-0.675823	0.02	0.205374
90592	ZNF700	-0.295	-0.675369	0.02	0.205374
372	ARCN1	0.3136	0.677016	0.021	0.209207
51062	ATL1	0.3152	0.679285	0.021	0.209207
124045	C16orf55	-0.3126	-0.701122	0.021	0.209207
51490	C9orf114	-0.322	-0.714174	0.021	0.209207
973	CD79A	-0.302	-0.68582	0.021	0.209207
149111	CNIH3	0.3169	0.681682	0.021	0.209207
8886	DDX18	0.338	0.710238	0.021	0.209207
79961	DENND2D	-0.2975	-0.679133	0.021	0.209207
51295	ECSIT	-0.3221	-0.71431	0.021	0.209207
64834	ELOVL1	0.3279	0.696844	0.021	0.209207
374986	FAM73A	0.3001	0.657348	0.021	0.209207
221472	FGD2	-0.3058	-0.691378	0.021	0.209207
2274	FHL2	0.328	0.696979	0.021	0.209207
23464	GCAT	-0.3096	-0.696855	0.021	0.209207
2734	GLG1	0.315	0.679002	0.021	0.209207
9330	GTF3C3	0.302	0.660172	0.021	0.209207
81932	HDHD3	-0.3291	-0.723714	0.021	0.209207
3628	INPP1	-0.326	-0.719582	0.021	0.209207
25948	KBTBD2	0.3249	0.692769	0.021	0.209207
3831	KLC1	0.3086	0.66984	0.021	0.209207
3851	KRT4	-0.3414	-0.739608	0.021	0.209207
4216	MAP3K4	0.3299	0.699536	0.021	0.209207
56922	MCCC1	-0.3028	-0.686997	0.021	0.209207
64210	MMS19	0.3095	0.671141	0.021	0.209207
143662	MUC15	-0.3222	-0.714446	0.021	0.209207
4607	MYBPC3	-0.304	-0.688755	0.021	0.209207
1463	NCAN	-0.3477	-0.747443	0.021	0.209207
10787	NCKAP1	0.3191	0.684763	0.021	0.209207
9975	NR1D2	-0.3058	-0.691378	0.021	0.209207
114884	OSBPL10	0.3076	0.668389	0.021	0.209207
114883	OSBPL9	0.3234	0.690714	0.021	0.209207
286530	P2RY8	-0.3059	-0.691523	0.021	0.209207
27043	PELP1	-0.3215	-0.713492	0.021	0.209207
5427	POLE2	-0.305	-0.690214	0.021	0.209207
8434	RECK	0.3193	0.685042	0.021	0.209207
10389	SCML2	-0.331	-0.726221	0.021	0.209207
57715	SEMA4G	0.2891	0.64063	0.021	0.209207
22941	SHANK2	0.2785	0.623923	0.021	0.209207
284427	SLC25A41	-0.32	-0.711437	0.021	0.209207
6508	SLC4A3	0.3121	0.674876	0.021	0.209207
28968	SLC6A16	-0.2945	-0.674612	0.021	0.209207
133022	TRAM1L1	0.2864	0.63643	0.021	0.209207
286827	TRIM59	-0.2924	-0.671417	0.021	0.209207
7204	TRIO	0.3013	0.659134	0.021	0.209207
29801	ZDHHC8	0.32	0.686016	0.021	0.209207
7773	ZNF230	-0.2968	-0.678083	0.021	0.209207
57343	ZNF304	0.3149	0.678861	0.021	0.209207
7626	ZNF75D	-0.2872	-0.663396	0.021	0.209207
58492	ZNF77	-0.2694	-0.634757	0.021	0.209207
323	APBB2	0.3309	0.700874	0.022	0.214339
83464	APH1B	0.3104	0.672438	0.022	0.214339
529	ATP6V1E1	-0.3094	-0.696569	0.022	0.214339
100141515	C17orf99	-0.3	-0.682862	0.022	0.214339
389336	C5orf46	0.284	0.632665	0.022	0.214339
137682	C8orf38	-0.3223	-0.714582	0.022	0.214339
79095	C9orf16	-0.3194	-0.710612	0.022	0.214339
400916	CHCHD10	-0.3344	-0.73066	0.022	0.214339
11151	CORO1A	-0.2735	-0.641517	0.022	0.214339
81624	DIAPH3	0.3073	0.667953	0.022	0.214339
5611	DNAJC3	0.2941	0.648307	0.022	0.214339
55194	FAM176B	0.2921	0.645251	0.022	0.214339
51313	FAM198B	0.3192	0.684902	0.022	0.214339
139716	GAB3	-0.275	-0.643965	0.022	0.214339
2571	GAD1	-0.296	-0.676879	0.022	0.214339
2843	GPR20	0.3108	0.673013	0.022	0.214339
9328	GTF3C5	-0.3044	-0.68934	0.022	0.214339
220988	HNRNPA3	-0.3199	-0.7113	0.022	0.214339
3623	INHA	0.286	0.635805	0.022	0.214339
152789	JAKMIP1	-0.296	-0.676879	0.022	0.214339
196374	KRT78	-0.3517	-0.752313	0.022	0.214339
341056	LOC341056	-0.296	-0.676879	0.022	0.214339
4237	MFAP2	0.3338	0.704729	0.022	0.214339
64963	MRPS11	-0.322	-0.714174	0.022	0.214339
4715	NDUFB9	-0.3255	-0.718911	0.022	0.214339
5110	PCMT1	0.2838	0.63235	0.022	0.214339
53916	RAB4B	-0.306	-0.691668	0.022	0.214339
5896	RAG1	0.2982	0.654505	0.022	0.214339
5935	RBM3	-0.3085	-0.695278	0.022	0.214339
29901	SAC3D1	-0.3038	-0.688463	0.022	0.214339
114821	SCAND3	0.3589	0.736392	0.022	0.214339
201175	SH3D20	0.2838	0.63235	0.022	0.214339
64116	SLC39A8	0.2814	0.628552	0.022	0.214339
10388	SYCP2	-0.3247	-0.717834	0.022	0.214339
53345	TM6SF2	0.3018	0.659876	0.022	0.214339
55591	VEZT	0.3163	0.680838	0.022	0.214339
126017	ZNF813	0.2973	0.653152	0.022	0.214339
84836	ABHD14B	-0.2751	-0.644128	0.023	0.21836
433	ASGR2	-0.29506	-0.67546	0.023	0.21836
285973	ATG9B	-0.3376	-0.734782	0.023	0.21836
9689	BZW1	0.3132	0.676446	0.023	0.21836
255809	C19orf38	-0.3189	-0.709923	0.023	0.21836
388125	C2CD4B	-0.2889	-0.666035	0.023	0.21836
51161	C3orf18	0.3107	0.672869	0.023	0.21836
79020	C7orf25	0.2973	0.653152	0.023	0.21836
8208	CHAF1B	-0.3117	-0.699847	0.023	0.21836
254263	CNIH2	-0.3176	-0.708125	0.023	0.21836
8530	CST7	-0.282	-0.655219	0.023	0.21836
54360	CYTL1	0.334	0.704993	0.023	0.21836
1627	DBN1	0.3327	0.703272	0.023	0.21836
55667	DENND4C	0.3164	0.680979	0.023	0.21836
10655	DMRT2	-0.318	-0.708679	0.023	0.21836
131118	DNAJC19	-0.3235	-0.716212	0.023	0.21836
9941	EXOG	-0.3062	-0.691958	0.023	0.21836
2568	GABRP	-0.321	-0.712808	0.023	0.21836
23072	HECW1	0.304	0.663125	0.023	0.21836
55806	HR	-0.3069	-0.692972	0.023	0.21836
3587	IL10RA	-0.2855	-0.66074	0.023	0.21836
3572	IL6ST	0.3107	0.672869	0.023	0.21836
79763	ISOC2	-0.3118	-0.699989	0.023	0.21836
57158	JPH2	0.3177	0.682805	0.023	0.21836
147727	LOC147727	-0.3151	-0.704641	0.023	0.21836
283174	LOC283174	-0.3286	-0.723051	0.023	0.21836
9450	LY86	-0.2841	-0.65854	0.023	0.21836
55090	MED9	-0.2975	-0.679133	0.023	0.21836
54842	MFSD6	-0.3359	-0.732599	0.023	0.21836
10482	NXF1	-0.3154	-0.705061	0.023	0.21836
24145	PANX1	0.3105	0.672582	0.023	0.21836
54984	PINX1	-0.3358	-0.73247	0.023	0.21836
5540	PPYR1	0.3348	0.706048	0.023	0.21836
64926	RASAL3	-0.2716	-0.638396	0.023	0.21836
6276	S100A5	-0.3213	-0.713218	0.023	0.21836
11231	SEC63	0.2783	0.623602	0.023	0.21836
4735	2015-09-02	0.3191	0.684763	0.023	0.21836
10734	STAG3	-0.3166	-0.706735	0.023	0.21836
7039	TGFA	0.322	0.688787	0.023	0.21836
7057	THBS1	0.3155	0.679709	0.023	0.21836
220359	TIGD3	-0.3248	-0.717968	0.023	0.21836
146057	TTBK2	0.2942	0.648459	0.023	0.21836
10652	YKT6	0.2921	0.645251	0.023	0.21836
26974	ZNF285	0.294	0.648154	0.023	0.21836
203	AK1	-0.3052	-0.690506	0.024	0.221803
9181	ARHGEF2	0.317	0.681823	0.024	0.221803
669	BPGM	-0.2749	-0.643803	0.024	0.221803
388011	C14orf64	-0.3332	-0.7291	0.024	0.221803
80262	C16orf70	-0.3236	-0.716347	0.024	0.221803
284325	C19orf54	-0.307	-0.693116	0.024	0.221803
54953	C1orf27	0.2978	0.653904	0.024	0.221803
974	CD79B	-0.2715	-0.638232	0.024	0.221803
79577	CDC73	0.3104	0.672438	0.024	0.221803
10462	CLEC10A	-0.2911	-0.669426	0.024	0.221803
8738	CRADD	-0.2869	-0.662928	0.024	0.221803
56253	CRTAM	-0.2828	-0.656487	0.024	0.221803
283742	FAM98B	0.3074	0.668099	0.024	0.221803
79153	GDPD3	-0.3049	-0.690069	0.024	0.221803
2720	GLB1	0.3181	0.683366	0.024	0.221803
8344	HIST1H2BE	-0.295	-0.675369	0.024	0.221803
3157	HMGCS1	0.2746	0.617628	0.024	0.221803
9452	ITM2A	-0.2784	-0.649467	0.024	0.221803
256949	KANK3	-0.2896	-0.667117	0.024	0.221803
84678	KDM2B	-0.2976	-0.679283	0.024	0.221803
57221	KIAA1244	0.2865	0.636586	0.024	0.221803
29956	LASS2	0.3137	0.677158	0.024	0.221803
3957	LGALS2	-0.2885	-0.665415	0.024	0.221803
149837	LOC149837	0.2883	0.639389	0.024	0.221803
399959	LOC399959	0.333	0.70367	0.024	0.221803
650623	LOC650623	0.3091	0.670563	0.024	0.221803
10894	LYVE1	0.3223	0.689201	0.024	0.221803
9848	MFAP3L	0.2942	0.648459	0.024	0.221803
8569	MKNK1	-0.282	-0.655219	0.024	0.221803
79682	MLF1IP	-0.3094	-0.696569	0.024	0.221803
79710	MORC4	-0.285	-0.659955	0.024	0.221803
4695	NDUFA2	-0.3063	-0.692103	0.024	0.221803
4833	NME4	0.3035	0.662389	0.024	0.221803
5037	PEBP1	-0.2949	-0.675218	0.024	0.221803
5209	PFKFB3	0.2921	0.645251	0.024	0.221803
5305	PIP4K2A	-0.2977	-0.679433	0.024	0.221803
51195	RAPGEFL1	-0.3535	-0.754478	0.024	0.221803
57142	RTN4	0.294	0.648154	0.024	0.221803
6319	SCD	0.3014	0.659283	0.024	0.221803
27240	SIT1	-0.2733	-0.641189	0.024	0.221803
474343	SPIN2B	-0.2859	-0.661366	0.024	0.221803
10252	SPRY1	0.297	0.6527	0.024	0.221803
9901	SRGAP3	-0.289	-0.66619	0.024	0.221803
9524	TECR	-0.3411	-0.739229	0.024	0.221803
10452	TOMM40	-0.3071	-0.693261	0.024	0.221803
51114	ZDHHC9	0.3098	0.671574	0.024	0.221803
221302	ZUFSP	0.2818	0.629187	0.024	0.221803
10096	ACTR3	0.3068	0.667225	0.025	0.226189
23536	ADAT1	0.2871	0.637522	0.025	0.226189
552	AVPR1A	0.329	0.698327	0.025	0.226189
583	BBS2	0.289	0.640475	0.025	0.226189
658	BMPR1B	0.2957	0.650736	0.025	0.226189
126526	C19orf47	-0.302	-0.68582	0.025	0.226189
125988	C19orf70	-0.3169	-0.707153	0.025	0.226189
767	CA8	0.3119	0.67459	0.025	0.226189
91057	CCDC34	-0.3149	-0.704361	0.025	0.226189
23607	CD2AP	0.3013	0.659134	0.025	0.226189
1588	CYP19A1	0.3097	0.671429	0.025	0.226189
1997	ELF1	0.2935	0.647392	0.025	0.226189
23197	FAF2	0.3054	0.66518	0.025	0.226189
159090	FAM122B	-0.292	-0.670805	0.025	0.226189
2188	FANCF	0.32039	0.686558	0.025	0.226189
2631	GBAS	0.2834	0.631719	0.025	0.226189
51659	GINS2	-0.3125	-0.700981	0.025	0.226189
92797	HELB	0.3008	0.658391	0.025	0.226189
135114	HINT3	0.2718	0.613059	0.025	0.226189
3208	HPCA	-0.3007	-0.6839	0.025	0.226189
29851	ICOS	-0.265	-0.627392	0.025	0.226189
221037	JMJD1C	0.3053	0.665034	0.025	0.226189
85352	KIAA1644	0.3243	0.691948	0.025	0.226189
23008	KLHDC10	0.3025	0.660913	0.025	0.226189
402377	LOC402377	0.3015	0.659431	0.025	0.226189
84918	LRP11	0.2977	0.653754	0.025	0.226189
4047	LSS	0.282	0.629504	0.025	0.226189
4301	MLLT4	0.2955	0.650433	0.025	0.226189
5372	PMM1	-0.2747	-0.643477	0.025	0.226189
5563	PRKAA2	0.2977	0.653754	0.025	0.226189
5954	RCN1	0.301	0.658688	0.025	0.226189
161253	REM2	-0.3074	-0.693694	0.025	0.226189
6039	RNASE6	-0.2921	-0.670958	0.025	0.226189
6238	RRBP1	0.3054	0.66518	0.025	0.226189
6345	SRL	-0.3149	-0.704361	0.025	0.226189
100170229	SRRM5	-0.2804	-0.652672	0.025	0.226189
94056	SYAP1	0.3364	0.708149	0.025	0.226189
344787	ZNF860	0.2874	0.63799	0.025	0.226189
51434	ANAPC7	-0.2905	-0.668504	0.026	0.230769
10095	ARPC1B	0.2901	0.642175	0.026	0.230769
79609	C14orf138	-0.298	-0.679882	0.026	0.230769
389084	C2orf82	0.3051	0.664741	0.026	0.230769
1601	DAB2	0.3092	0.670708	0.026	0.230769
11056	DDX52	0.3313	0.701408	0.026	0.230769
2204	FCAR	0.3223	0.689201	0.026	0.230769
28982	FLVCR1	0.3061	0.666204	0.026	0.230769
8908	GYG2	0.312	0.674733	0.026	0.230769
3768	KCNJ12	0.3051	0.664741	0.026	0.230769
57214	KIAA1199	0.3166	0.68126	0.026	0.230769
202781	LOC202781	-0.2984	-0.68048	0.026	0.230769
400027	LOC400027	-0.304	-0.688755	0.026	0.230769
728554	LOC728554	-0.3122	-0.700556	0.026	0.230769
54947	LPCAT2	0.2984	0.654805	0.026	0.230769
4171	MCM2	-0.2835	-0.657594	0.026	0.230769
9439	MED23	0.2807	0.627439	0.026	0.230769
394263	MUC21	-0.3187	-0.709647	0.026	0.230769
79594	MUL1	0.2802	0.626642	0.026	0.230769
4650	MYO9B	-0.299	-0.681375	0.026	0.230769
4676	NAP1L4	-0.3037	-0.688316	0.026	0.230769
5121	PCP4	-0.3475	-0.747198	0.026	0.230769
54965	PIGX	-0.2973	-0.678834	0.026	0.230769
84265	POLR3GL	-0.2828	-0.656487	0.026	0.230769
22841	RAB11FIP2	0.2959	0.651039	0.026	0.230769
25956	SEC31B	-0.3003	-0.683307	0.026	0.230769
57794	SF4	-0.3095	-0.696712	0.026	0.230769
6573	SLC19A1	0.3143	0.67801	0.026	0.230769
8987	STBD1	0.2745	0.617465	0.026	0.230769
497189	TIFAB	-0.2868	-0.662772	0.026	0.230769
79953	TMEM90B	0.327	0.695626	0.026	0.230769
23495	TNFRSF13B	-0.2813	-0.654107	0.026	0.230769
285386	TPRG1	-0.3004	-0.683456	0.026	0.230769
11326	VSIG4	0.288	0.638923	0.026	0.230769
29066	ZC3H7A	0.2894	0.641094	0.026	0.230769
23527	ACAP2	-0.2948	-0.675066	0.027	0.233686
3268	AGFG2	-0.3082	-0.694846	0.027	0.233686
196	AHR	0.3056	0.665473	0.027	0.233686
80776	B9D2	-0.3019	-0.685673	0.027	0.233686
81576	CCDC130	-0.3015	-0.685083	0.027	0.233686
6364	CCL20	0.331	0.701008	0.027	0.233686
56548	CHST7	-0.2778	-0.648501	0.027	0.233686
10370	CITED2	0.2939	0.648002	0.027	0.233686
1438	CSF2RA	-0.294	-0.673853	0.027	0.233686
3577	CXCR1	0.2995	0.656452	0.027	0.233686
1595	CYP51A1	0.2885	0.6397	0.027	0.233686
51339	DACT1	0.2902	0.64233	0.027	0.233686
8291	DYSF	0.2901	0.642175	0.027	0.233686
55837	EAPP	-0.2986	-0.680778	0.027	0.233686
441518	FAM127C	-0.2914	-0.669886	0.027	0.233686
11116	FGFR1OP	0.2782	0.623442	0.027	0.233686
55137	FIGN	0.2758	0.619573	0.027	0.233686
28964	GIT1	-0.2929	-0.67218	0.027	0.233686
80045	GPR157	0.3093	0.670852	0.027	0.233686
3581	IL9R	-0.2828	-0.656487	0.027	0.233686
441204	LOC441204	0.31	0.671862	0.027	0.233686
9926	LPGAT1	0.3047	0.664154	0.027	0.233686
4033	LRMP	-0.2962	-0.67718	0.027	0.233686
79903	NAT15	-0.2957	-0.676427	0.027	0.233686
135112	NCOA7	0.2829	0.630929	0.027	0.233686
4776	NFATC4	0.3133	0.676589	0.027	0.233686
56130	PCDHB6	0.3227	0.689752	0.027	0.233686
5213	PFKM	0.2938	0.64785	0.027	0.233686
51316	PLAC8	-0.2846	-0.659327	0.027	0.233686
64857	PLEKHG2	0.311	0.6733	0.027	0.233686
5438	POLR2I	-0.2958	-0.676577	0.027	0.233686
9051	PSTPIP1	-0.2708	-0.637076	0.027	0.233686
5802	PTPRS	-0.282	-0.655219	0.027	0.233686
25837	RAB26	-0.312	-0.700273	0.027	0.233686
10179	RBM7	0.2862	0.636117	0.027	0.233686
5984	RFC4	-0.2871	-0.66324	0.027	0.233686
10556	RPP30	-0.297	-0.678383	0.027	0.233686
57419	SLC24A3	0.3202	0.686294	0.027	0.233686
84102	SLC41A2	0.2756	0.61925	0.027	0.233686
6534	SLC6A7	0.287	0.637367	0.027	0.233686
90864	SPSB3	-0.2744	-0.642988	0.027	0.233686
23635	SSBP2	-0.3148	-0.70422	0.027	0.233686
55901	THSD1	0.3367	0.708542	0.027	0.233686
84203	TXNDC2	0.2837	0.632192	0.027	0.233686
55230	USP40	0.2937	0.647697	0.027	0.233686
10885	WDR3	0.2923	0.645558	0.027	0.233686
55888	ZNF167	0.3263	0.694676	0.027	0.233686
84279	C2orf7	-0.3182	-0.708956	0.028	0.238182
10225	CD96	-0.2726	-0.640041	0.028	0.238182
1059	CENPB	-0.2756	-0.644941	0.028	0.238182
92421	CHMP4C	0.3005	0.657944	0.028	0.238182
29121	CLEC2D	-0.2697	-0.635255	0.028	0.238182
22982	DIP2C	0.28	0.626323	0.028	0.238182
85458	DIXDC1	0.3352	0.706575	0.028	0.238182
55007	FAM118A	-0.2977	-0.679433	0.028	0.238182
83417	FCRL4	-0.3102	-0.697712	0.028	0.238182
2793	GNGT2	-0.2733	-0.641189	0.028	0.238182
6596	HLTF	-0.3028	-0.686997	0.028	0.238182
3455	IFNAR2	0.286	0.635805	0.028	0.238182
22998	LIMCH1	0.3001	0.657348	0.028	0.238182
91289	LMF2	-0.2789	-0.650271	0.028	0.238182
388588	LOC388588	0.3009	0.65854	0.028	0.238182
653786	LOC653786	-0.3051	-0.69036	0.028	0.238182
26020	LRP10	0.3068	0.667225	0.028	0.238182
5008	OSM	0.2859	0.635648	0.028	0.238182
5050	PAFAH1B3	-0.2886	-0.66557	0.028	0.238182
445815	PALM2-AKAP2	0.3204	0.686572	0.028	0.238182
9708	PCDHGA8	0.2966	0.652097	0.028	0.238182
56104	PCDHGB1	0.2944	0.648763	0.028	0.238182
51334	PRR16	0.3106	0.672725	0.028	0.238182
326624	RAB37	-0.2759	-0.645428	0.028	0.238182
9367	RAB9A	-0.299	-0.681375	0.028	0.238182
6185	RPN2	0.3099	0.671718	0.028	0.238182
6326	SCN2A	0.2943	0.648611	0.028	0.238182
10572	SIVA1	-0.2739	-0.642171	0.028	0.238182
140597	TCEAL2	-0.3089	-0.695852	0.028	0.238182
55706	TMEM48	0.284	0.632665	0.028	0.238182
127933	UHMK1	0.3078	0.66868	0.028	0.238182
7407	VARS	0.289	0.640475	0.028	0.238182
284309	ZNF776	0.2671	0.605296	0.028	0.238182
388552	BLOC1S3	-0.3091	-0.696139	0.029	0.242651
28952	CCDC22	-0.2867	-0.662616	0.029	0.242651
1291	COL6A1	0.3166	0.68126	0.029	0.242651
1293	COL6A3	0.3079	0.668825	0.029	0.242651
1299	COL9A3	0.2891	0.64063	0.029	0.242651
8292	COLQ	-0.2978	-0.679583	0.029	0.242651
57699	CPNE5	-0.297	-0.678383	0.029	0.242651
4921	DDR2	0.2986	0.655105	0.029	0.242651
2304	FOXE1	-0.2923	-0.671264	0.029	0.242651
2632	GBE1	0.2936	0.647545	0.029	0.242651
27232	GNMT	-0.3015	-0.685083	0.029	0.242651
2961	GTF2E2	-0.3008	-0.684048	0.029	0.242651
3683	ITGAL	-0.2574	-0.614403	0.029	0.242651
10625	IVNS1ABP	0.3102	0.67215	0.029	0.242651
25845	LOC25845	-0.2942	-0.674157	0.029	0.242651
92259	MRPS36	-0.2961	-0.67703	0.029	0.242651
347273	MURC	0.2806	0.62728	0.029	0.242651
114803	MYSM1	0.305	0.664594	0.029	0.242651
51471	NAT8B	-0.2972	-0.678684	0.029	0.242651
654816	NCF1B	-0.2634	-0.624686	0.029	0.242651
53829	P2RY13	-0.275	-0.643965	0.029	0.242651
56097	PCDHGC5	0.2798	0.626004	0.029	0.242651
80003	PCNXL2	0.2771	0.621672	0.029	0.242651
57381	RHOJ	0.3137	0.677158	0.029	0.242651
388228	SBK1	-0.3227	-0.715126	0.029	0.242651
166929	SGMS2	0.3163	0.680838	0.029	0.242651
126969	SLC44A3	0.2793	0.625204	0.029	0.242651
146857	SLFN13	-0.2893	-0.666653	0.029	0.242651
10972	TMED10	0.2826	0.630455	0.029	0.242651
7253	TSHR	-0.301	-0.684344	0.029	0.242651
10382	TUBB4	-0.3008	-0.684048	0.029	0.242651
7559	ZNF12	0.2918	0.644791	0.029	0.242651
80325	ABTB1	-0.2774	-0.647856	0.03	0.245985
25841	ABTB2	0.3014	0.659283	0.03	0.245985
50	ACO2	-0.2823	-0.655695	0.03	0.245985
151188	ARL6IP6	0.2886	0.639855	0.03	0.245985
138199	C9orf41	0.2868	0.637055	0.03	0.245985
22918	CD93	0.3203	0.686433	0.03	0.245985
1185	CLCN6	0.2969	0.652549	0.03	0.245985
1186	CLCN7	-0.2857	-0.661053	0.03	0.245985
283420	CLEC9A	-0.298	-0.679882	0.03	0.245985
93058	COQ10A	-0.2794	-0.651073	0.03	0.245985
283106	CSNK2A1P	0.2937	0.647697	0.03	0.245985
55040	EPN3	-0.2966	-0.677782	0.03	0.245985
23359	FAM189A1	0.3045	0.663861	0.03	0.245985
9637	FEZ2	0.2789	0.624564	0.03	0.245985
6624	FSCN1	0.2888	0.640165	0.03	0.245985
3004	GZMM	-0.2625	-0.623157	0.03	0.245985
57722	IGDCC4	0.3095	0.671141	0.03	0.245985
4678	NASP	-0.2848	-0.659641	0.03	0.245985
85407	NKD1	0.2921	0.645251	0.03	0.245985
4682	NUBP1	-0.2753	-0.644454	0.03	0.245985
26747	NUFIP1	0.3015	0.659431	0.03	0.245985
146183	OTOA	-0.281	-0.653629	0.03	0.245985
10954	PDIA5	0.3313	0.701408	0.03	0.245985
84725	PLEKHA8	0.3052	0.664887	0.03	0.245985
441263	PMS2L11	-0.3186	-0.709509	0.03	0.245985
8612	PPAP2C	-0.3001	-0.683011	0.03	0.245985
196051	PPAPDC1A	0.2978	0.653904	0.03	0.245985
80243	PREX2	0.3026	0.661061	0.03	0.245985
79641	ROGDI	-0.3012	-0.68464	0.03	0.245985
6497	SKI	0.2844	0.633295	0.03	0.245985
8614	STC2	0.294	0.648154	0.03	0.245985
7024	TFCP2	0.2884	0.639545	0.03	0.245985
7162	TPBG	0.2847	0.633766	0.03	0.245985
59341	TRPV4	-0.292	-0.670805	0.03	0.245985
10077	TSPAN32	-0.294	-0.673853	0.03	0.245985
27229	TUBGCP4	0.2871	0.637522	0.03	0.245985
85015	USP45	0.2628	0.598092	0.03	0.245985
11152	WDR45	-0.2941	-0.674005	0.03	0.245985
51741	WWOX	-0.2929	-0.67218	0.03	0.245985
346157	ZNF391	0.305	0.664594	0.03	0.245985
116987	AGAP1	0.2807	0.627439	0.031	0.249925
55252	ASXL2	0.2953	0.65013	0.031	0.249925
28958	CCDC56	-0.3126	-0.701122	0.031	0.249925
3075	CFH	0.289	0.640475	0.031	0.249925
[truncated: 14,359 more rows]

## Sheet: COAD
Entrez ID	Gene Name	Raw Cox Coefficient	Sigmoidal Normalized Cox Coefficient	Raw Cox P-Value	BH Adjusted P-Value	Model: coxph(Surv(times,died) ~ gene + sex + age
170961	ANKRD24	0.4902	0.957926	9.4e-06	0.090277
2563	GABRD	0.5101	0.96389	1.1e-05	0.090277
23145	SSPO	0.4503	0.942927	5.4e-05	0.295452
8497	PPFIA4	0.4137	0.92469	7.2e-05	0.295452
525	ATP6V1B1	0.4571	0.945808	0.00012	0.340668
140459	ASB6	0.4335	0.93516	0.00017	0.340668
392617	ELFN1	0.3824	0.904759	0.00018	0.340668
23275	POFUT2	0.405	0.919592	0.00019	0.340668
26508	HEYL	0.414	0.92486	0.0002	0.340668
196872	MGC23270	0.4063	0.920374	0.00022	0.340668
1588	CYP19A1	0.4185	0.927368	0.00025	0.340668
9253	NUMBL	0.3831	0.905255	0.00025	0.340668
8334	HIST1H2AC	0.4552	0.945018	0.00027	0.340668
220930	LOC220930	0.3759	0.900033	0.00033	0.340668
114043	C21orf90	0.411	0.923142	0.00036	0.340668
3017	HIST1H2BD	0.4195	0.927915	0.00041	0.340668
9	NAT1	-0.365	-0.931413	0.00042	0.340668
10858	CYP46A1	0.3889	0.909273	0.00046	0.340668
283521	FLJ37307	0.395	0.913323	0.00047	0.340668
57864	SLC46A2	0.4016	0.917511	0.00047	0.340668
374654	KIF7	0.3878	0.908524	0.00049	0.340668
200765	TIGD1	0.3626	0.889661	0.0005	0.340668
166785	MMAA	-0.36112	-0.929024	0.00051	0.340668
286223	C9orf47	0.3702	0.895706	0.00053	0.340668
57622	LRFN1	0.3763	0.90033	0.00054	0.340668
60677	CELF6	0.3756	0.899809	0.00057	0.340668
8349	HIST2H2BE	0.3868	0.907838	0.00062	0.340668
6529	SLC6A1	0.3621	0.889251	0.00062	0.340668
1413	CRYBA4	0.3903	0.910218	0.00063	0.340668
26470	SEZ6L2	0.355	0.883287	0.00064	0.340668
910	CD1B	-0.4111	-0.954469	0.00073	0.340668
53407	STX18	-0.3599	-0.928256	0.00073	0.340668
23539	SLC16A8	0.38092	0.903702	0.00075	0.340668
4059	BCAM	0.3551	0.883373	0.00079	0.340668
6329	SCN4A	0.3723	0.89732	0.00082	0.340668
55472	C8orf39	0.3627	0.889742	0.00083	0.340668
7781	SLC30A3	0.3926	0.911751	0.00085	0.340668
2936	GSR	-0.3595	-0.928003	0.00087	0.340668
441381	LRRC24	0.3392	0.868916	0.00089	0.340668
115948	CCDC151	0.3685	0.894381	0.0009	0.340668
85358	SHANK3	0.346	0.875292	0.00091	0.340668
23353	SUN1	0.3388	0.868532	0.00091	0.340668
79970	ZNF767	0.3513	0.88006	0.00091	0.340668
57828	CATSPERG	0.3575	0.885421	0.00095	0.340668
55300	PI4K2B	-0.3541	-0.924495	0.001	0.340668
7322	UBE2D2	-0.3645	-0.93111	0.001	0.340668
27439	CECR6	0.3538	0.882249	0.0011	0.340668
3151	HMGN2	-0.3551	-0.925157	0.0011	0.340668
3748	KCNC3	0.3429	0.872422	0.0011	0.340668
57787	MARK4	0.3531	0.88164	0.0011	0.340668
27068	PPA2	-0.3358	-0.91135	0.0011	0.340668
5863	RGL2	0.34861	0.877662	0.0011	0.340668
54437	SEMA5B	0.3384	0.868146	0.0011	0.340668
57184	C15orf17	0.3415	0.871106	0.0012	0.351729
100216545	LOC100216545	0.3359	0.865714	0.0012	0.351729
92162	TMEM88	0.3502	0.879085	0.0012	0.351729
2926	GRSF1	-0.3367	-0.912045	0.0013	0.353532
3012	HIST1H2AE	0.3811	0.903831	0.0013	0.353532
6262	RYR2	0.3073	0.834776	0.0013	0.353532
22893	BAHD1	0.348	0.877112	0.0014	0.353532
26086	GPSM1	0.3585	0.886264	0.0014	0.353532
84894	LINGO1	0.3543	0.882683	0.0014	0.353532
4355	MPP2	0.342	0.871578	0.0014	0.353532
283948	NHLRC4	0.3489	0.877923	0.0014	0.353532
5253	PHF2	0.3744	0.898911	0.0014	0.353532
80863	PRRT1	0.3431	0.872609	0.0015	0.354897
25994	HIGD1A	-0.352	-0.923088	0.0016	0.354897
3574	IL7	-0.3452	-0.918354	0.0016	0.354897
10984	KCNQ1OT1	0.3356	0.865419	0.0016	0.354897
8019	BRD3	0.3275	0.857232	0.0017	0.354897
51162	EGFL7	0.3503	0.879174	0.0017	0.354897
55056	FLJ10038	0.3327	0.862539	0.0017	0.354897
390598	LBXCOR1	0.3508	0.879618	0.0017	0.354897
81562	LMAN2L	0.3457	0.875017	0.0017	0.354897
7873	MANF	-0.34479	-0.91806	0.0017	0.354897
221955	DAGLB	0.3351	0.864926	0.0018	0.354897
2664	GDI1	0.3348	0.86463	0.0018	0.354897
3303	HSPA1A	0.32034	0.849614	0.0018	0.354897
25806	VAX2	0.3795	0.902677	0.0018	0.354897
374887	YJEFN3	0.35331	0.881823	0.0018	0.354897
8602	NOP14	-0.3621	-0.929635	0.0019	0.354897
5314	PKHD1	0.3462	0.875475	0.0019	0.354897
387890	TMEM233	0.3293	0.85909	0.0019	0.354897
7480	WNT10B	0.3168	0.845711	0.0019	0.354897
93233	CCDC114	0.3294	0.859192	0.002	0.354897
440689	HIST2H2BF	0.3511	0.879883	0.002	0.354897
3770	KCNJ14	0.31374	0.842263	0.002	0.354897
85474	LBX2	0.3251	0.854719	0.002	0.354897
55379	LRRC59	-0.3375	-0.912658	0.002	0.354897
5265	SERPINA1	-0.3381	-0.913115	0.002	0.354897
253982	ASPHD1	0.33287	0.862709	0.0021	0.354897
131408	FAM131A	0.3419	0.871483	0.0021	0.354897
84893	FBXO18	0.3333	0.863139	0.0021	0.354897
3750	KCND1	0.3425	0.872047	0.0021	0.354897
5745	PTH1R	0.3291	0.858885	0.0021	0.354897
5935	RBM3	-0.3179	-0.8964	0.0021	0.354897
1822	ATN1	0.342	0.871578	0.0022	0.354897
401232	DKFZP686I15217	0.3258	0.855456	0.0022	0.354897
29952	DPP7	0.3298	0.859602	0.0022	0.354897
27434	POLM	0.3348	0.86463	0.0022	0.354897
1417	CRYBB3	0.3505	0.879351	0.0023	0.354897
338758	LOC338758	0.3467	0.875932	0.0023	0.354897
259232	NALCN	0.3523	0.88094	0.0023	0.354897
153478	PLEKHG4B	0.3548	0.883114	0.0023	0.354897
132241	RPL32P3	0.31977	0.848992	0.0023	0.354897
1376	CPT2	-0.3154	-0.894131	0.0024	0.354897
55846	ITFG2	0.3403	0.869968	0.0024	0.354897
84740	LOC84740	0.3192	0.848367	0.0024	0.354897
8996	NOL3	0.34274	0.872272	0.0024	0.354897
347148	QRFP	0.3411	0.870728	0.0024	0.354897
83439	TCF7L1	0.3253	0.85493	0.0024	0.354897
64773	FAM113A	0.3092	0.837018	0.0025	0.359956
3838	KPNA2	-0.3347	-0.910494	0.0025	0.359956
100272217	LOC100272217	0.3345	0.864333	0.0025	0.359956
29883	CNOT7	-0.3222	-0.900196	0.0026	0.367674
202915	TMEM184A	0.3188	0.847928	0.0026	0.367674
342035	GLDN	0.3404	0.870063	0.0027	0.367674
2935	GSPT1	-0.3261	-0.903524	0.0027	0.367674
56124	PCDHB12	0.3084	0.836077	0.0027	0.367674
210	ALAD	0.3378	0.867566	0.0028	0.367674
3299	HSF4	0.3375	0.867275	0.0028	0.367674
5718	PSMD12	-0.3353	-0.910962	0.0028	0.367674
84074	QRICH2	0.3372	0.866984	0.0028	0.367674
56159	TEX11	-0.3504	-0.921998	0.0028	0.367674
8427	ZNF282	0.3217	0.851089	0.0028	0.367674
51023	MRPS18C	-0.32029	-0.898526	0.0029	0.372516
128414	NKAIN4	0.3388	0.868532	0.0029	0.372516
2027	ENO3	0.3228	0.852273	0.003	0.372516
138311	FAM69B	0.3168	0.845711	0.003	0.372516
51704	GPRC5B	0.3214	0.850765	0.003	0.372516
1737	DLAT	-0.3115	-0.890498	0.0031	0.372516
8701	DNAH11	0.3465	0.87575	0.0031	0.372516
9737	GPRASP1	0.3146	0.84324	0.0031	0.372516
8365	HIST1H4H	0.3408	0.870443	0.0031	0.372516
283731	LOC283731	0.3416	0.8712	0.0031	0.372516
339674	LOC339674	0.3211	0.85044	0.0031	0.372516
71	ACTG1	-0.3189	-0.897295	0.0032	0.372516
54793	KCTD9	-0.3154	-0.894131	0.0032	0.372516
55276	PGM2	-0.3069	-0.886061	0.0032	0.372516
10891	PPARGC1A	-0.3081	-0.887235	0.0032	0.372516
90673	PPP1R3E	0.33696	0.86675	0.0032	0.372516
995	CDC25C	-0.3073	-0.886454	0.0033	0.378785
122953	JDP2	0.3094	0.837252	0.0033	0.378785
58190	CTDSP1	0.3332	0.86304	0.0034	0.380457
64116	SLC39A8	-0.2817	-0.858619	0.0034	0.380457
2745	GLRX	-0.322	-0.900022	0.0035	0.380457
164312	LRRN4	0.3111	0.839232	0.0035	0.380457
5367	PMCH	-0.3504	-0.921998	0.0035	0.380457
5900	RALGDS	0.3117	0.839926	0.0035	0.380457
6615	SNAI1	0.3293	0.85909	0.0035	0.380457
644150	WIPF3	0.3189	0.848038	0.0035	0.380457
575	BAI1	0.3117	0.839926	0.0036	0.381228
2222	FDFT1	-0.3129	-0.891815	0.0036	0.381228
63977	PRDM15	0.3342	0.864036	0.0036	0.381228
10494	STK25	0.3182	0.847266	0.0036	0.381228
2242	FES	0.3022	0.828618	0.0037	0.381961
3625	INHBB	0.2973	0.822506	0.0037	0.381961
125336	LOXHD1	0.3294	0.859192	0.0037	0.381961
284086	NEK8	0.3233	0.852808	0.0037	0.381961
22881	ANKRD6	0.3236	0.853128	0.0038	0.386212
4123	MAN2C1	0.3084	0.836077	0.0038	0.386212
199857	ALG14	-0.2975	-0.876465	0.0039	0.386212
10500	SEMA6C	0.3062	0.833465	0.0039	0.386212
10554	AGPAT1	0.3095	0.837369	0.004	0.386212
1857	DVL3	0.3174	0.846379	0.004	0.386212
7867	MAPKAPK3	-0.33803	-0.913062	0.004	0.386212
55768	NGLY1	-0.3048	-0.88398	0.004	0.386212
4926	NUMA1	0.3298	0.859602	0.004	0.386212
5252	PHF1	0.3037	0.83045	0.004	0.386212
10325	RRAGB	0.307	0.834419	0.004	0.386212
27235	COQ2	-0.3001	-0.879192	0.0041	0.386767
64582	GPR135	0.3023	0.828741	0.0041	0.386767
9013	TAF1C	0.3132	0.841648	0.0041	0.386767
255043	TMEM86B	0.3179	0.846934	0.0041	0.386767
8915	BCL10	-0.298	-0.876994	0.0042	0.391698
9095	TBX19	0.3044	0.831299	0.0042	0.391698
646762	LOC646762	0.3157	0.84448	0.0043	0.394303
9344	TAOK2	0.3091	0.8369	0.0043	0.394303
29062	WDR91	0.3121	0.840387	0.0043	0.394303
1408	CRY2	0.3013	0.82751	0.0045	0.408083
5601	MAPK9	-0.30213	-0.881283	0.0045	0.408083
79567	FAM65A	0.297	0.822126	0.0046	0.414859
80150	ASRGL1	-0.3188	-0.897206	0.0047	0.42066
147011	PROCA1	0.29368	0.817866	0.0048	0.42066
51807	TUBA8	0.3066	0.833943	0.0048	0.42066
24147	FJX1	0.3143	0.8429	0.0049	0.42066
7841	MOGS	0.32109	0.850429	0.0049	0.42066
83714	NRIP2	0.3144	0.843013	0.0049	0.42066
135250	RAET1E	-0.30325	-0.882421	0.0049	0.42066
6390	SDHB	-0.2846	-0.862064	0.0049	0.42066
375341	C3orf62	0.30281	0.829365	0.005	0.42066
29093	MRPL22	-0.3091	-0.888204	0.005	0.42066
54453	RIN2	0.2941	0.81841	0.005	0.42066
9962	SLC23A2	0.3103	0.838303	0.005	0.42066
80167	C4orf29	-0.313	-0.891909	0.0051	0.42066
285908	NCRNA00174	0.3046	0.831541	0.0051	0.42066
5451	POU2F1	0.3016	0.82788	0.0051	0.42066
80263	TRIM45	0.3032	0.829841	0.0051	0.42066
403341	ZBTB34	0.305	0.832024	0.0051	0.42066
79706	PRKRIP1	0.2944	0.818797	0.0052	0.421644
79819	WDR78	-0.2908	-0.86917	0.0052	0.421644
250	ALPP	0.3092	0.837018	0.0053	0.421644
9820	CUL7	0.2972	0.82238	0.0053	0.421644
1612	DAPK1	0.287	0.809015	0.0053	0.421644
11043	MID2	0.2864	0.808202	0.0053	0.421644
7062	TCHH	0.2821	0.80228	0.0053	0.421644
56990	CDC42SE2	-0.2911	-0.869505	0.0054	0.421644
148113	CILP2	0.2943	0.818668	0.0054	0.421644
283011	FLJ37201	0.2891	0.811838	0.0054	0.421644
51809	GALNT7	-0.2993	-0.878359	0.0054	0.421644
152100	CMC1	-0.3083	-0.887429	0.0055	0.421644
100128285	DNM1P35	0.3042	0.831057	0.0055	0.421644
5998	RGS3	0.3102	0.838187	0.0055	0.421644
84734	FAM167B	0.2865	0.808337	0.0056	0.421644
3396	ICT1	-0.3174	-0.89595	0.0056	0.421644
27158	NDOR1	0.305	0.832024	0.0056	0.421644
93145	OLFM2	0.2849	0.806154	0.0056	0.421644
147912	SIX5	0.3058	0.832986	0.0056	0.421644
9454	HOMER3	0.2846	0.805743	0.0057	0.422869
169834	ZNF883	0.3043	0.831178	0.0057	0.422869
11273	ATXN2L	0.2869	0.80888	0.0058	0.422869
79852	EPHX3	0.30276	0.829304	0.0058	0.422869
10868	USP20	0.3072	0.834657	0.0058	0.422869
54084	C21orf29	0.286901	0.808881	0.0059	0.422869
100270710	LOC100270710	0.288	0.810364	0.0059	0.422869
10811	NOXA1	0.309	0.836783	0.0059	0.422869
54476	RNF216	0.26489	0.776926	0.0059	0.422869
54910	SEMA4C	0.3012	0.827386	0.0059	0.422869
414918	FAM116B	0.3069	0.8343	0.006	0.422869
2321	FLT1	0.2962	0.821108	0.006	0.422869
404037	HAPLN4	0.3076	0.835132	0.006	0.422869
23309	SIN3B	0.3069	0.8343	0.006	0.422869
169436	C9orf96	0.2896	0.812505	0.0061	0.422869
427	ASAH1	-0.2929	-0.871499	0.0062	0.422869
2817	GPC1	0.28	0.79933	0.0062	0.422869
4855	NOTCH4	0.2958	0.820597	0.0062	0.422869
151	ADRA2B	0.3182	0.847266	0.0063	0.422869
900	CCNG1	-0.2872	-0.865087	0.0063	0.422869
8671	SLC4A4	-0.2791	-0.855463	0.0063	0.422869
79149	ZSCAN5A	-0.29391	-0.872605	0.0063	0.422869
1523	CUX1	0.2951	0.819699	0.0064	0.422869
389072	PLEKHM3	0.2978	0.823139	0.0064	0.422869
90459	ERI1	-0.29312	-0.87174	0.0065	0.422869
143630	UBQLNL	0.299	0.824649	0.0065	0.422869
90338	ZNF160	0.2704	0.785338	0.0065	0.422869
10695	CNPY3	0.2915	0.815019	0.0066	0.422869
57593	EBF4	0.2852	0.806565	0.0066	0.422869
51573	GDE1	-0.3025	-0.88166	0.0066	0.422869
53833	IL20RB	0.3105	0.838536	0.0066	0.422869
100286844	LOC100286844	0.281844	0.801923	0.0066	0.422869
642826	LOC642826	0.2885	0.811036	0.0066	0.422869
54995	OXSM	-0.2866	-0.864395	0.0066	0.422869
222255	ATXN7L1	0.3009	0.827015	0.0067	0.422869
153684	LOC153684	0.3016	0.82788	0.0067	0.422869
64061	TSPYL2	0.2938	0.818021	0.0067	0.422869
79820	CATSPERB	-0.2837	-0.861003	0.0068	0.422869
26577	PCOLCE2	0.2947	0.819184	0.0068	0.422869
6911	TBX6	0.2861	0.807794	0.0068	0.422869
729171	ANKRD20B	0.3069	0.8343	0.0069	0.422869
6373	CXCL11	-0.2965	-0.875401	0.007	0.422869
4803	NGF	0.2938	0.818021	0.007	0.422869
5457	POU4F1	0.3128	0.84119	0.007	0.422869
7386	UQCRFS1	-0.2839	-0.86124	0.007	0.422869
256764	WDR72	0.2794	0.79848	0.007	0.422869
285343	C3orf23	-0.291	-0.869393	0.0071	0.422869
821	CANX	-0.2922	-0.870727	0.0071	0.422869
1466	CSRP2	0.2786	0.797341	0.0071	0.422869
10211	FLOT1	0.2926	0.81646	0.0071	0.422869
51649	MRPS23	-0.3082	-0.887332	0.0071	0.422869
65980	BRD9	0.295	0.819571	0.0072	0.422869
1665	DHX15	-0.2975	-0.876465	0.0072	0.422869
4034	LRCH4	0.2987	0.824272	0.0072	0.422869
55174	INTS10	-0.287507	-0.865439	0.0073	0.422869
283314	LOC283314	0.2928	0.816721	0.0073	0.422869
9232	PTTG1	-0.2808	-0.857534	0.0073	0.422869
116988	AGAP3	0.2885	0.811036	0.0074	0.422869
60494	CCDC81	0.3081	0.835723	0.0074	0.422869
1749	DLX5	0.3028	0.829353	0.0074	0.422869
114130	MGC16384	0.2924	0.816199	0.0074	0.422869
64779	MTHFSD	0.283848	0.804707	0.0074	0.422869
11162	NUDT6	-0.2861	-0.863815	0.0074	0.422869
5686	PSMA5	-0.2773	-0.85324	0.0074	0.422869
387264	KRTAP5-1	0.2808	0.800458	0.0075	0.422869
100129387	LOC100129387	0.2943	0.818668	0.0075	0.422869
1953	MEGF6	0.2894	0.812239	0.0075	0.422869
79957	PAQR6	0.2753	0.792584	0.0075	0.422869
142680	SLC34A3	0.295	0.819571	0.0075	0.422869
399726	C10orf114	0.2863	0.808066	0.0076	0.422869
1397	CRIP2	0.2762	0.793891	0.0076	0.422869
115290	FBXO17	0.2812	0.801021	0.0076	0.422869
151534	LOC151534	0.2822	0.80242	0.0076	0.422869
51253	MRPL37	-0.2816	-0.858499	0.0076	0.422869
4712	NDUFB6	-0.2928	-0.871389	0.0076	0.422869
221078	NSUN6	0.2819	0.802001	0.0076	0.422869
6421	SFPQ	-0.2941	-0.872812	0.0076	0.422869
8941	CDK5R2	0.2817	0.801721	0.0077	0.42412
2107	ETF1	-0.2909	-0.869282	0.0077	0.42412
124842	TMEM132E	0.3099	0.837837	0.0077	0.42412
1815	DRD4	0.2872	0.809286	0.0078	0.426764
7701	ZNF142	0.2995	0.825274	0.0078	0.426764
610	HCN2	0.274	0.790683	0.0079	0.427448
653113	LOC653113	0.3003	0.826271	0.0079	0.427448
401303	ZNF815	0.2706	0.785638	0.0079	0.427448
54328	GPR173	0.2865	0.808337	0.008	0.427448
51081	MRPS7	-0.293	-0.871609	0.008	0.427448
5798	PTPRN	0.2785	0.797198	0.008	0.427448
56267	CCBL2	-0.2765	-0.852242	0.0081	0.427448
51335	NGRN	0.2744	0.79127	0.0081	0.427448
5635	PRPSAP1	-0.28537	-0.862966	0.0081	0.427448
64940	STAG3L4	0.2749	0.792001	0.0081	0.427448
8801	SUCLG2	-0.2758	-0.851364	0.0081	0.427448
26137	ZBTB20	0.2863	0.808066	0.0082	0.427448
7988	ZNF212	0.2778	0.796197	0.0082	0.427448
440905	LOC440905	0.2934	0.817502	0.0083	0.427448
7692	ZNF133	0.2885	0.811036	0.0083	0.427448
53371	NUP54	-0.2826	-0.859697	0.0084	0.427448
9364	RAB28	-0.2816	-0.858499	0.0084	0.427448
9640	ZNF592	0.2991	0.824774	0.0084	0.427448
54872	PIGG	-0.2905	-0.868834	0.0085	0.427448
79844	ZDHHC11	0.2874	0.809556	0.0085	0.427448
8754	ADAM9	-0.2822	-0.859219	0.0086	0.427448
80864	EGFL8	0.2745	0.791416	0.0086	0.427448
2296	FOXC1	0.2751	0.792293	0.0086	0.427448
200312	RNF215	0.283	0.803533	0.0086	0.427448
78989	COLEC11	0.2801	0.799471	0.0087	0.427448
1795	DOCK3	0.2844	0.805468	0.0087	0.427448
10736	SIX2	0.2882	0.810633	0.0087	0.427448
23261	CAMTA1	-0.2807	-0.857413	0.0088	0.427448
221914	GPC2	0.28879	0.811424	0.0088	0.427448
22880	MORC2	0.28688	0.808853	0.0088	0.427448
23339	VPS39	0.2745	0.791416	0.0088	0.427448
84445	LZTS2	0.2699	0.784587	0.0089	0.427448
5324	PLAG1	0.2691	0.783379	0.0089	0.427448
1903	S1PR3	0.2609	0.770655	0.0089	0.427448
116969	ART5	0.3015	0.827757	0.009	0.427448
84865	CCDC142	0.28972	0.812665	0.009	0.427448
113189	CHST14	0.273	0.78921	0.009	0.427448
8841	HDAC3	-0.28824	-0.866278	0.009	0.427448
3093	UBE2K	-0.2842	-0.861594	0.009	0.427448
145407	C14orf37	0.2929	0.816852	0.0091	0.427448
388969	C2orf68	0.29479	0.8193	0.0091	0.427448
3640	INSL3	0.2777	0.796053	0.0091	0.427448
339983	NAT8L	0.3037	0.83045	0.0091	0.427448
4854	NOTCH3	0.2779	0.79634	0.0091	0.427448
7022	TFAP2C	0.2762	0.793891	0.0091	0.427448
285629	LOC285629	-0.29872	-0.877752	0.0092	0.427448
27153	ZNF777	0.289	0.811705	0.0092	0.427448
8632	DNAH17	0.2838	0.804641	0.0093	0.427448
112970	KTI12	-0.2851	-0.86265	0.0093	0.427448
92249	LOC92249	0.2721	0.787877	0.0093	0.427448
54797	MED18	-0.2747	-0.849974	0.0093	0.427448
8615	USO1	-0.2728	-0.847545	0.0093	0.427448
146059	CDAN1	0.27291	0.789077	0.0094	0.427448
30818	KCNIP3	0.2784	0.797055	0.0094	0.427448
678655	LOC678655	0.279	0.797911	0.0094	0.427448
51106	TFB1M	-0.2776	-0.853613	0.0094	0.427448
360200	TMPRSS9	0.2959	0.820725	0.0094	0.427448
6047	RNF4	-0.2816	-0.858499	0.0095	0.427448
26012	NELF	0.2682	0.782013	0.0096	0.427448
56666	PANX2	0.2855	0.806976	0.0096	0.427448
85364	ZCCHC3	0.2668	0.779874	0.0096	0.427448
51304	ZDHHC3	-0.2865	-0.864279	0.0096	0.427448
121274	ZNF641	0.2883	0.810767	0.0096	0.427448
221749	C6orf145	0.284	0.804917	0.0097	0.427448
4157	MC1R	0.256	0.762745	0.0097	0.427448
111	ADCY5	0.2568	0.764052	0.0098	0.427448
645811	CCDC154	0.2778	0.796197	0.0098	0.427448
389741	MGC21881	0.2849	0.806154	0.0098	0.427448
57003	CCDC47	-0.2863	-0.864047	0.0099	0.427448
339105	PRSS53	0.2964	0.821363	0.0099	0.427448
51660	BRP44L	-0.26414	-0.83601	0.01	0.427448
254427	C10orf47	0.2746	0.791562	0.01	0.427448
909	CD1A	-0.2737	-0.8487	0.01	0.427448
1639	DCTN1	0.2797	0.798905	0.01	0.427448
50619	DEF6	0.2831	0.803672	0.01	0.427448
80153	EDC3	0.2778	0.796197	0.01	0.427448
83933	HDAC10	0.2778	0.796197	0.01	0.427448
8339	HIST1H2BG	0.29767	0.822975	0.01	0.427448
57549	IGSF9	0.2626	0.773345	0.01	0.427448
143666	LOC143666	0.2872	0.809286	0.01	0.427448
57380	MRS2	-0.28	-0.856563	0.01	0.427448
112476	PRRT2	0.286	0.807658	0.01	0.427448
10302	SNAPC5	0.2695	0.783984	0.01	0.427448
83595	SOX7	0.2729	0.789063	0.01	0.427448
84696	ABHD1	0.2751	0.792293	0.011	0.439304
11093	ADAMTS13	0.27603	0.793645	0.011	0.439304
196500	C12orf53	0.2685	0.78247	0.011	0.439304
51093	C1orf66	0.2733	0.789653	0.011	0.439304
85026	C9orf37	0.2907	0.813964	0.011	0.439304
778	CACNA1F	0.2927	0.816591	0.011	0.439304
124093	CCDC78	0.256	0.762745	0.011	0.439304
54805	CNNM2	0.2742	0.790976	0.011	0.439304
2919	CXCL1	-0.2667	-0.8395	0.011	0.439304
3300	DNAJB2	0.2817	0.801721	0.011	0.439304
8448	DOC2A	0.27149	0.786969	0.011	0.439304
255031	FLJ35390	0.2629	0.773817	0.011	0.439304
3074	HEXB	-0.27596	-0.851565	0.011	0.439304
3225	HOXC9	0.2866	0.808473	0.011	0.439304
3984	LIMK1	0.2758	0.793311	0.011	0.439304
57509	MTUS1	-0.2577	-0.826923	0.011	0.439304
57701	NCKAP5L	0.2781	0.796627	0.011	0.439304
57595	PDZD4	0.2625	0.773188	0.011	0.439304
79037	PVRIG	0.2947	0.819184	0.011	0.439304
169714	QSOX2	0.2701	0.784888	0.011	0.439304
53637	S1PR5	0.2698	0.784436	0.011	0.439304
4246	SCGB2A1	-0.2922	-0.870727	0.011	0.439304
8273	SLC10A3	0.2659	0.778489	0.011	0.439304
6621	SNAPC4	0.2758	0.793311	0.011	0.439304
7015	TERT	0.2983	0.823769	0.011	0.439304
7139	TNNT2	0.2806	0.800177	0.011	0.439304
7442	TRPV1	0.2764	0.794181	0.011	0.439304
155060	?	0.2624	0.77303	0.012	0.439661
5825	ABCD3	-0.2609	-0.831494	0.012	0.439661
242	ALOX12B	0.2644	0.776164	0.012	0.439661
23237	ARC	0.2606	0.770177	0.012	0.439661
9828	ARHGEF17	0.2547	0.760607	0.012	0.439661
673	BRAF	0.27334	0.789712	0.012	0.439661
25874	BRP44	-0.2578	-0.827068	0.012	0.439661
286122	C8orf31	0.2659	0.778489	0.012	0.439661
9478	CABP1	0.2575	0.765191	0.012	0.439661
891	CCNB1	-0.2619	-0.8329	0.012	0.439661
1040	CDS1	-0.262	-0.83304	0.012	0.439661
51138	COPS4	-0.2801	-0.856685	0.012	0.439661
1495	CTNNA1	-0.2748	-0.850101	0.012	0.439661
9265	CYTH3	0.278	0.796483	0.012	0.439661
1760	DMPK	0.2543	0.759946	0.012	0.439661
283849	EXOC3L	0.2756	0.79302	0.012	0.439661
2593	GAMT	0.2781	0.796627	0.012	0.439661
2787	GNG5	-0.2611	-0.831776	0.012	0.439661
2961	GTF2E2	-0.2675	-0.840577	0.012	0.439661
57817	HAMP	0.2688	0.782925	0.012	0.439661
3161	HMMR	-0.2687	-0.84218	0.012	0.439661
57611	ISLR2	0.2881	0.810499	0.012	0.439661
154881	KCTD7	0.26633	0.779152	0.012	0.439661
145783	LOC145783	0.2823	0.802559	0.012	0.439661
253039	LOC253039	0.28428	0.805302	0.012	0.439661
2615	LRRC32	0.2685	0.78247	0.012	0.439661
4052	LTBP1	0.2563	0.763236	0.012	0.439661
375775	PNPLA7	0.2741	0.79083	0.012	0.439661
8073	PTP4A2	-0.267	-0.839905	0.012	0.439661
5866	RAB3IL1	0.2616	0.771766	0.012	0.439661
401331	RASA4P	0.2649	0.776941	0.012	0.439661
252983	STXBP4	-0.2851	-0.86265	0.012	0.439661
79865	TREML2	0.263	0.773974	0.012	0.439661
7364	UGT2B7	-0.2636	-0.835265	0.012	0.439661
126374	WTIP	0.2553	0.761596	0.012	0.439661
100125288	ZGLP1	0.2817	0.801721	0.012	0.439661
57209	ZNF248	0.2718	0.787431	0.012	0.439661
8546	AP3B1	-0.273	-0.847802	0.013	0.445341
149478	BTBD19	0.2672	0.780487	0.013	0.445341
140701	C20orf135	0.2715	0.786984	0.013	0.445341
129790	C7orf13	0.2675	0.780946	0.013	0.445341
10423	CDIPT	0.2732	0.789506	0.013	0.445341
1198	CLK3	0.2661	0.778798	0.013	0.445341
285521	COX18	-0.2644	-0.836368	0.013	0.445341
127579	DCST2	0.2793	0.798338	0.013	0.445341
25981	DNAH1	0.2755	0.792875	0.013	0.445341
2550	GABBR1	0.27142	0.786865	0.013	0.445341
392862	GRID2IP	0.2596	0.768579	0.013	0.445341
3015	H2AFZ	-0.258	-0.827356	0.013	0.445341
3040	HBA2	0.2688	0.782925	0.013	0.445341
3233	HOXD4	0.2836	0.804364	0.013	0.445341
9358	ITGBL1	0.2895	0.812372	0.013	0.445341
7975	MAFK	0.2705	0.785488	0.013	0.445341
8510	MMP23B	0.268	0.781709	0.013	0.445341
54148	MRPL39	-0.2629	-0.834295	0.013	0.445341
400508	NCRNA00169	0.2843	0.80533	0.013	0.445341
91754	NEK9	0.26492	0.776972	0.013	0.445341
4843	NOS2	-0.256814	-0.825638	0.013	0.445341
56965	PARP6	0.2581	0.766164	0.013	0.445341
56121	PCDHB15	0.2554	0.76176	0.013	0.445341
79990	PLEKHH3	0.2587	0.767132	0.013	0.445341
5414	2015-09-04	0.2654	0.777716	0.013	0.445341
6426	SFRS1	-0.2641	-0.835955	0.013	0.445341
4087	SMAD2	-0.2651	-0.837327	0.013	0.445341
79816	TLE6	0.2825	0.802838	0.013	0.445341
55858	TMEM165	-0.275	-0.850354	0.013	0.445341
10188	TNK2	0.2731	0.789358	0.013	0.445341
27327	TNRC6A	0.2809	0.800599	0.013	0.445341
57406	ABHD6	-0.2654	-0.837737	0.014	0.445341
118932	ANKRD22	-0.2664	-0.839095	0.014	0.445341
306	ANXA3	-0.2575	-0.826634	0.014	0.445341
23621	BACE1	0.2507	0.753924	0.014	0.445341
399761	BMS1P5	0.2721	0.787877	0.014	0.445341
440087	C12orf69	0.281	0.80074	0.014	0.445341
124783	C17orf46	0.2709	0.786088	0.014	0.445341
828	CAPS	0.2743	0.791123	0.014	0.445341
1107	CHD3	0.2746	0.791562	0.014	0.445341
200407	CREG2	0.2735	0.789948	0.014	0.445341
196792	FAM24B	0.25498	0.761069	0.014	0.445341
2806	GOT2	-0.2833	-0.86053	0.014	0.445341
440435	GPR179	0.27513	0.792336	0.014	0.445341
8370	HIST2H4A	0.2926	0.81646	0.014	0.445341
57338	JPH3	0.2704	0.785338	0.014	0.445341
27094	KCNMB3	0.2645	0.77632	0.014	0.445341
375616	KCP	0.2758	0.793311	0.014	0.445341
151174	LOC151174	0.2767	0.794614	0.014	0.445341
1241	LTB4R	0.2571	0.764541	0.014	0.445341
4327	MMP19	0.2749	0.792001	0.014	0.445341
89795	NAV3	0.2671	0.780334	0.014	0.445341
283932	NCRNA00095	0.2616	0.771766	0.014	0.445341
4897	NRCAM	0.2673	0.78064	0.014	0.445341
23659	PLA2G15	0.2699	0.784587	0.014	0.445341
64857	PLEKHG2	0.2639	0.775384	0.014	0.445341
5395	PMS2	0.24934	0.751616	0.014	0.445341
441191	RNF216L	0.256	0.762745	0.014	0.445341
94081	SFXN1	-0.259	-0.828794	0.014	0.445341
28972	SPCS1	-0.2764	-0.852117	0.014	0.445341
57731	SPTBN4	0.2648	0.776786	0.014	0.445341
90019	SYT8	0.2618	0.772083	0.014	0.445341
5726	TAS2R38	0.2641	0.775696	0.014	0.445341
23424	TDRD7	-0.284	-0.861358	0.014	0.445341
7138	TNNT1	0.2686	0.782621	0.014	0.445341
22954	TRIM32	0.2747	0.791709	0.014	0.445341
149076	ZNF362	0.2735	0.789948	0.014	0.445341
9726	ZNF646	0.2588	0.767294	0.014	0.445341
51	ACOX1	-0.2673	-0.840308	0.015	0.451761
150709	ANKAR	0.2688	0.782925	0.015	0.451761
338692	ANKRD13D	0.2662	0.778952	0.015	0.451761
364	AQP7	0.28632	0.808093	0.015	0.451761
487	ATP2A1	0.2659	0.778489	0.015	0.451761
10476	ATP5H	-0.273	-0.847802	0.015	0.451761
685	BTC	-0.2666	-0.839365	0.015	0.451761
401253	C6orf227	0.2751	0.792293	0.015	0.451761
117155	CATSPER2	0.2552	0.761431	0.015	0.451761
2057	EPOR	0.2649	0.776941	0.015	0.451761
2324	FLT4	0.266	0.778643	0.015	0.451761
2298	FOXD4	0.2739	0.790536	0.015	0.451761
8324	FZD7	0.2404	0.735975	0.015	0.451761
283383	GPR133	0.2707	0.785788	0.015	0.451761
84289	ING5	0.27213	0.787922	0.015	0.451761
26548	ITGB1BP2	0.2411	0.737229	0.015	0.451761
11178	LZTS1	0.2652	0.777407	0.015	0.451761
339483	MTMR9L	0.2617	0.771925	0.015	0.451761
400866	NCRNA00114	-0.266212	-0.83884	0.015	0.451761
25849	PARM1	-0.2452	-0.807976	0.015	0.451761
55872	PBK	-0.2582	-0.827645	0.015	0.451761
5502	PPP1R1A	0.2684	0.782318	0.015	0.451761
5777	PTPN6	0.2631	0.774131	0.015	0.451761
79933	SYNPO2L	0.2732	0.789506	0.015	0.451761
7157	TP53	-0.2679	-0.841113	0.015	0.451761
83882	TSPAN10	0.254	0.759449	0.015	0.451761
51465	UBE2J1	-0.2593	-0.829223	0.015	0.451761
8408	ULK1	0.2677	0.781252	0.015	0.451761
84640	USP38	-0.2586	-0.82822	0.015	0.451761
10347	ABCA7	0.2654	0.777716	0.016	0.463182
55139	ANKZF1	0.261	0.770814	0.016	0.463182
91828	C14orf73	0.2642	0.775852	0.016	0.463182
284836	C21orf125	0.27045	0.785413	0.016	0.463182
64753	CCDC136	0.2407	0.736513	0.016	0.463182
50624	CUZD1	0.2572	0.764704	0.016	0.463182
3155	HMGCL	-0.2547	-0.822536	0.016	0.463182
65123	INTS3	0.2491	0.751207	0.016	0.463182
6787	NEK4	-0.246	-0.809242	0.016	0.463182
80336	PABPC1L	0.249	0.751036	0.016	0.463182
55690	PACS1	0.2528	0.757452	0.016	0.463182
5153	PDE1B	0.2594	0.768258	0.016	0.463182
54101	RIPK4	0.2658	0.778335	0.016	0.463182
641977	SEPT7P2	0.24375	0.741932	0.016	0.463182
399512	SLC25A35	0.251	0.754431	0.016	0.463182
55706	TMEM48	-0.2608	-0.831353	0.016	0.463182
388730	TMEM81	0.2642	0.775852	0.016	0.463182
7327	UBE2G2	0.2627	0.773503	0.016	0.463182
6843	VAMP1	0.2704	0.785338	0.016	0.463182
201501	ZBTB7C	-0.26351	-0.835141	0.016	0.463182
83637	ZMIZ2	0.2492	0.751377	0.016	0.463182
387590	psiTPTE22	0.2548	0.760772	0.016	0.463182
51099	ABHD5	-0.2597	-0.829793	0.017	0.465063
474	ATOH1	-0.25673	-0.825516	0.017	0.465063
526	ATP6V1B2	-0.2535	-0.820754	0.017	0.465063
400073	C12orf76	0.2656	0.778026	0.017	0.465063
1018	CDK3	0.2689	0.783076	0.017	0.465063
1029	CDKN2A	0.2334	0.723153	0.017	0.465063
92806	CENPBD1	0.2528	0.757452	0.017	0.465063
493856	CISD2	-0.2457	-0.808768	0.017	0.465063
137075	CLDN23	-0.2566	-0.825326	0.017	0.465063
90639	COX19	0.2465	0.746735	0.017	0.465063
399665	FAM102A	0.2562	0.763072	0.017	0.465063
81558	FAM117A	0.2636	0.774915	0.017	0.465063
284069	FAM171A2	0.2555	0.761925	0.017	0.465063
2259	FGF14	0.2744	0.79127	0.017	0.465063
11146	GLMN	-0.2506	-0.816379	0.017	0.465063
2946	GSTM2	0.2468	0.747255	0.017	0.465063
115106	HAUS1	-0.2556	-0.823863	0.017	0.465063
8353	HIST1H3E	0.2726	0.788619	0.017	0.465063
90246	LOC90246	0.2686	0.782621	0.017	0.465063
83742	MARVELD1	0.237	0.729811	0.017	0.465063
8512	MBL1P	0.2795	0.798621	0.017	0.465063
4861	NPAS1	0.2548	0.760772	0.017	0.465063
56133	PCDHB2	0.2606	0.770177	0.017	0.465063
5125	PCSK5	0.2538	0.759117	0.017	0.465063
5224	PGAM2	0.2628	0.77366	0.017	0.465063
5373	PMM2	-0.2545	-0.82224	0.017	0.465063
116362	RBP7	0.2647	0.776631	0.017	0.465063
23231	SEL1L3	-0.2544	-0.822092	0.017	0.465063
10237	SLC35B1	-0.2541	-0.821647	0.017	0.465063
117178	SSX2IP	-0.2504	-0.816073	0.017	0.465063
93643	TJAP1	0.24361	0.741685	0.017	0.465063
349136	WDR86	0.2593	0.768098	0.017	0.465063
7710	ZNF154	0.2643	0.776008	0.017	0.465063
10060	ABCC9	0.248	0.749323	0.018	0.469678
251	ALPPL2	0.2566	0.763726	0.018	0.469678
375484	C5orf25	-0.2553	-0.823422	0.018	0.469678
81571	C9orf45	0.2664	0.779259	0.018	0.469678
30850	CDR2L	0.249	0.751036	0.018	0.469678
9746	CLSTN3	0.2592	0.767937	0.018	0.469678
8178	ELL	0.2534	0.758453	0.018	0.469678
8933	FAM127A	0.2532	0.75812	0.018	0.469678
60681	FKBP10	0.2652	0.777407	0.018	0.469678
25794	FSCN2	0.2553	0.761596	0.018	0.469678
2582	GALE	-0.2483	-0.812841	0.018	0.469678
2888	GRB14	0.2318	0.720149	0.018	0.469678
2922	GRP	0.2639	0.775384	0.018	0.469678
51564	HDAC7	0.2512	0.754768	0.018	0.469678
643719	LOC643719	0.2589	0.767455	0.018	0.469678
10296	MAEA	-0.2538	-0.821201	0.018	0.469678
51108	METTL9	-0.2609	-0.831494	0.018	0.469678
203245	NAIF1	0.2672	0.780487	0.018	0.469678
126147	NTN5	0.2582	0.766325	0.018	0.469678
26167	PCDHB5	0.2524	0.756784	0.018	0.469678
7703	PCGF2	0.251	0.754431	0.018	0.469678
65979	PHACTR4	-0.25821	-0.827659	0.018	0.469678
55361	PI4K2A	0.2408	0.736693	0.018	0.469678
340526	RGAG4	0.2455	0.744998	0.018	0.469678
51804	SIX4	0.2605	0.770018	0.018	0.469678
23169	SLC35D1	-0.2472	-0.811127	0.018	0.469678
51760	SYT17	0.2456	0.745172	0.018	0.469678
83878	USHBP1	0.2532	0.75812	0.018	0.469678
10297	APC2	0.2543	0.759946	0.019	0.469678
347	APOD	0.2553	0.761596	0.019	0.469678
393	ARHGAP4	0.25163	0.755492	0.019	0.469678
404550	C16orf74	0.24502	0.74416	0.019	0.469678
100130311	C17orf107	0.2534	0.758453	0.019	0.469678
11064	CEP110	0.2562	0.763072	0.019	0.469678
1182	CLCN3	-0.2587	-0.828364	0.019	0.469678
143884	CWF19L2	0.2444	0.743074	0.019	0.469678
54431	DNAJC10	-0.2468	-0.810501	0.019	0.469678
1775	DNASE1L2	0.25911	0.767792	0.019	0.469678
2307	FOXS1	0.2596	0.768579	0.019	0.469678
26330	GAPDHS	0.2645	0.77632	0.019	0.469678
128312	HIST3H2BB	0.26411	0.775712	0.019	0.469678
51477	ISYNA1	0.2416	0.738122	0.019	0.469678
64147	KIF9	-0.2625	-0.833738	0.019	0.469678
441455	LOC441455	0.2607	0.770337	0.019	0.469678
642852	LOC642852	0.2562	0.763072	0.019	0.469678
55631	LRRC40	-0.2503	-0.815921	0.019	0.469678
6300	MAPK12	0.255	0.761102	0.019	0.469678
10724	MGEA5	0.2727	0.788767	0.019	0.469678
79873	NUDT18	-0.2582	-0.827645	0.019	0.469678
54760	PCSK4	0.2448	0.743775	0.019	0.469678
55558	PLXNA3	0.2619	0.772241	0.019	0.469678
9374	PPT2	0.2382	0.732	0.019	0.469678
23637	RABGAP1	0.2596	0.768579	0.019	0.469678
5914	RARA	0.2375	0.730725	0.019	0.469678
6253	RTN2	0.2393	0.733994	0.019	0.469678
5413	2015-09-05	0.2576	0.765353	0.019	0.469678
10463	SLC30A9	-0.2514	-0.817595	0.019	0.469678
60559	SPCS3	-0.2538	-0.821201	0.019	0.469678
54429	TAS2R5	0.2559	0.762581	0.019	0.469678
7076	TIMP1	0.2398	0.734896	0.019	0.469678
29850	TRPM5	0.2572	0.764704	0.019	0.469678
7993	UBXN8	-0.2436	-0.805421	0.019	0.469678
137492	VPS37A	-0.2513	-0.817443	0.019	0.469678
155382	VPS37D	0.2513	0.754937	0.019	0.469678
79777	ACBD4	0.238	0.731637	0.02	0.473026
196883	ADCY4	0.2491	0.751207	0.02	0.473026
26993	AKAP8L	0.24178	0.738443	0.02	0.473026
100133941	CD24	-0.2513	-0.817443	0.02	0.473026
84940	CORO6	0.2466	0.746909	0.02	0.473026
1353	COX11	-0.254	-0.821498	0.02	0.473026
23116	FAM179B	0.2734	0.7898	0.02	0.473026
2588	GALNS	0.2426	0.7399	0.02	0.473026
10539	GLRX3	-0.2598	-0.829935	0.02	0.473026
55027	HEATR3	-0.2569	-0.825763	0.02	0.473026
8344	HIST1H2BE	0.2618	0.772083	0.02	0.473026
8970	HIST1H2BJ	0.2683	0.782166	0.02	0.473026
337875	HIST2H2BA	0.2664	0.779259	0.02	0.473026
9858	KIAA0649	0.2457	0.745346	0.02	0.473026
23395	LARS2	-0.266	-0.838553	0.02	0.473026
149134	LOC149134	0.2625	0.773188	0.02	0.473026
8932	MBD2	-0.25015	-0.815691	0.02	0.473026
10392	NOD1	0.25529	0.761579	0.02	0.473026
25926	NOL11	-0.2558	-0.824156	0.02	0.473026
153768	PRELID2	-0.25	-0.815461	0.02	0.473026
5549	PRELP	0.2556	0.762089	0.02	0.473026
864	RUNX3	0.2309	0.718448	0.02	0.473026
151295	SLC23A3	0.2598	0.7689	0.02	0.473026
9197	SLC33A1	-0.2484	-0.812996	0.02	0.473026
6543	SLC8A2	0.2463	0.746389	0.02	0.473026
6857	SYT1	0.22624	0.7095	0.02	0.473026
50999	TMED5	-0.2471	-0.810971	0.02	0.473026
7273	TTN	0.2659	0.778489	0.02	0.473026
7329	UBE2I	-0.2541	-0.821647	0.02	0.473026
54532	USP53	-0.2591	-0.828937	0.02	0.473026
1173	AP2M1	0.249	0.751036	0.021	0.484121
91050	CCDC149	-0.25265	-0.819481	0.021	0.484121
79071	ELOVL6	-0.2484	-0.812996	0.021	0.484121
252995	FNDC5	0.2475	0.748463	0.021	0.484121
56850	GRIPAP1	0.259	0.767616	0.021	0.484121
728323	LOC728323	0.2639	0.775384	0.021	0.484121
23164	MPRIP	0.2503	0.753247	0.021	0.484121
151507	MSL3L2	0.2278	0.712522	0.021	0.484121
9572	NR1D1	0.2347	0.725573	0.021	0.484121
79646	PANK3	-0.2477	-0.811908	0.021	0.484121
29964	PRICKLE4	0.2614	0.771449	0.021	0.484121
51560	RAB6B	0.233	0.722404	0.021	0.484121
5893	RAD52	0.2564	0.763399	0.021	0.484121
6853	SYN1	0.2504	0.753417	0.021	0.484121
11076	TPPP	0.2363	0.728527	0.021	0.484121
11219	TREX2	0.2455	0.744998	0.021	0.484121
7410	VAV2	0.2294	0.715593	0.021	0.484121
23039	XPO7	-0.2549	-0.822832	0.021	0.484121
83543	AIF1L	0.2553	0.761596	0.022	0.493317
79624	C6orf211	-0.2435	-0.80526	0.022	0.493317
85417	CCNB3	0.258	0.766002	0.022	0.493317
157313	CDCA2	-0.2407	-0.800712	0.022	0.493317
51167	CYB5R4	-0.2491	-0.814078	0.022	0.493317
8527	DGKD	0.2524	0.756784	0.022	0.493317
3239	HOXD13	0.2528	0.757452	0.022	0.493317
57613	KIAA1467	0.2432	0.740962	0.022	0.493317
43849	KLK12	-0.2422	-0.80316	0.022	0.493317
4122	MAN2A2	0.2438	0.74202	0.022	0.493317
9020	MAP3K14	0.2478	0.74898	0.022	0.493317
114044	MCM3APAS	0.2396	0.734536	0.022	0.493317
201626	PDE12	-0.2479	-0.812219	0.022	0.493317
29990	PILRB	0.2382	0.732	0.022	0.493317
768206	PRCD	0.253	0.757786	0.022	0.493317
55095	SAMD4B	0.2507	0.753924	0.022	0.493317
55164	SHQ1	-0.2542	-0.821795	0.022	0.493317
442578	STAG3L3	0.2516	0.755442	0.022	0.493317
441151	TMEM151B	0.2436	0.741667	0.022	0.493317
84874	ZNF514	0.2519	0.755946	0.022	0.493317
63874	ABHD4	0.2557	0.762253	0.023	0.502024
101	ADAM8	0.2413	0.737587	0.023	0.502024
217	ALDH2	-0.2479	-0.812219	0.023	0.502024
9331	B4GALT6	-0.2412	-0.801531	0.023	0.502024
1812	DRD1	0.2474	0.748291	0.023	0.502024
79927	GRRP1	0.2369	0.729628	0.023	0.502024
8357	HIST1H3H	0.263	0.773974	0.023	0.502024
3235	HOXD9	0.2413	0.737587	0.023	0.502024
3425	IDUA	0.253	0.757786	0.023	0.502024
64087	MCCC2	-0.2376	-0.795568	0.023	0.502024
51072	MEMO1	-0.2575	-0.826634	0.023	0.502024
4998	ORC1L	-0.25234	-0.819015	0.023	0.502024
5520	PPP2R2A	-0.2433	-0.804938	0.023	0.502024
10737	RFPL3S	0.2547	0.760607	0.023	0.502024
9783	RIMS3	-0.24159	-0.802168	0.023	0.502024
201595	STT3B	-0.2418	-0.80251	0.023	0.502024
6872	TAF1	0.2408	0.736693	0.023	0.502024
26000	TBC1D10B	0.2556	0.762089	0.023	0.502024
81789	TIGD6	-0.2501	-0.815615	0.023	0.502024
9352	TXNL1	-0.2431	-0.804616	0.023	0.502024
419	ART3	-0.2381	-0.796405	0.024	0.508488
140680	C20orf96	0.2316	0.719772	0.024	0.508488
25966	C2CD2	0.2359	0.727791	0.024	0.508488
9635	CLCA2	-0.2795	-0.855953	0.024	0.508488
1196	CLK2	0.2375	0.730725	0.024	0.508488
79690	GAL3ST4	0.2343	0.72483	0.024	0.508488
51206	GP6	0.2369	0.729628	0.024	0.508488
57117	INTS12	-0.2317	-0.78545	0.024	0.508488
4135	MAP6	0.2295	0.715784	0.024	0.508488
4200	ME2	-0.2294	-0.781388	0.024	0.508488
79854	NCRNA00115	0.251	0.754431	0.024	0.508488
4858	NOVA2	0.238	0.731637	0.024	0.508488
80742	PRR3	0.23416	0.72457	0.024	0.508488
5690	PSMB2	-0.24025	-0.799973	0.024	0.508488
22870	SAPS1	0.2453	0.744649	0.024	0.508488
5274	SERPINI1	0.2493	0.751548	0.024	0.508488
6499	SKIV2L	0.2466	0.746909	0.024	0.508488
161497	STRC	0.2482	0.749667	0.024	0.508488
84790	TUBA1C	-0.2557	-0.82401	0.024	0.508488
6293	VPS52	0.241	0.737051	0.024	0.508488
11174	ADAMTS6	0.2407	0.736513	0.025	0.508488
367	AR	0.2513	0.754937	0.025	0.508488
23192	ATG4B	0.2406	0.736334	0.025	0.508488
348738	C2orf48	0.2526	0.757118	0.025	0.508488
220388	CCDC89	0.2479	0.749151	0.025	0.508488
55755	CDK5RAP2	0.2517	0.75561	0.025	0.508488
1347	COX7A2	-0.2534	-0.820604	0.025	0.508488
2921	CXCL3	-0.237	-0.794558	0.025	0.508488
1762	DMWD	0.2392	0.733813	0.025	0.508488
1956	EGFR	0.23532	0.726721	0.025	0.508488
26234	FBXL5	-0.24304	-0.804519	0.025	0.508488
2256	FGF11	0.2495	0.751888	0.025	0.508488
2271	FH	-0.2409	-0.80104	0.025	0.508488
652968	GATSL3	0.2442	0.742723	0.025	0.508488
2887	GRB10	0.233	0.722404	0.025	0.508488
7978	MTERF	0.2441	0.742547	0.025	0.508488
64151	NCAPG	-0.2341	-0.789618	0.025	0.508488
54413	NLGN3	0.2329	0.722217	0.025	0.508488
29881	NPC1L1	0.2413	0.737587	0.025	0.508488
57107	PDSS2	-0.24	-0.799561	0.025	0.508488
8864	PER2	0.25734	0.764931	0.025	0.508488
138429	PIP5KL1	0.2549	0.760937	0.025	0.508488
344405	PRDXDD1P	0.2367	0.729262	0.025	0.508488
137902	PXDNL	0.2494	0.751718	0.025	0.508488
64284	RAB17	0.2469	0.747428	0.025	0.508488
5989	RFX1	0.2399	0.735076	0.025	0.508488
57494	RIMKLB	0.2401	0.735436	0.025	0.508488
120103	SLC36A4	-0.2398	-0.799231	0.025	0.508488
50840	TAS2R14	0.24491	0.743967	0.025	0.508488
3196	TLX2	0.2621	0.772557	0.025	0.508488
80723	TMEM22	0.2312	0.719016	0.025	0.508488
388121	TNFAIP8L3	0.2263	0.709617	0.025	0.508488
7170	TPM3	-0.2461	-0.8094	0.025	0.508488
388165	UBE2Q2P1	0.2505	0.753586	0.025	0.508488
26100	WIPI2	0.23028	0.717271	0.025	0.508488
1636	ACE	0.2387	0.732908	0.026	0.512938
387763	AG2	0.2274	0.711749	0.026	0.512938
570	BAAT	-0.247	-0.810814	0.026	0.512938
256329	C11orf35	0.2468	0.747255	0.026	0.512938
100134934	C17orf106	-0.2387	-0.797407	0.026	0.512938
54964	C1orf56	0.25	0.752738	0.026	0.512938
339453	C1orf70	0.2333	0.722966	0.026	0.512938
1852	DUSP9	0.2483	0.749838	0.026	0.512938
11328	FKBP9	0.2267	0.710394	0.026	0.512938
55691	FRMD4A	0.243	0.740608	0.026	0.512938
3142	HLX	0.2257	0.708448	0.026	0.512938
3156	HMGCR	-0.233	-0.787717	0.026	0.512938
3312	HSPA8	-0.23	-0.782454	0.026	0.512938
344595	LOC344595	0.2294	0.715593	0.026	0.512938
80741	LY6G5C	0.2382	0.732	0.026	0.512938
64598	MOSPD3	0.24148	0.737908	0.026	0.512938
84148	MYST1	0.2302	0.717119	0.026	0.512938
4798	NFRKB	0.2417	0.7383	0.026	0.512938
11188	NISCH	0.2567	0.763889	0.026	0.512938
6474	SHOX2	0.2525	0.756951	0.026	0.512938
159963	SLC5A12	0.2483	0.749838	0.026	0.512938
8831	SYNGAP1	0.2527	0.757285	0.026	0.512938
64852	TUT1	0.24	0.735256	0.026	0.512938
85463	ZC3H12C	-0.2318	-0.785625	0.026	0.512938
84124	ZNF394	0.2354	0.726869	0.026	0.512938
39	ACAT2	-0.2509	-0.816836	0.027	0.514725
84364	ARFGAP2	0.2495	0.751888	0.027	0.514725
537	ATP6AP1	0.2358	0.727607	0.027	0.514725
283870	C16orf79	0.2397	0.734716	0.027	0.514725
284018	C17orf58	-0.2388	-0.797573	0.027	0.514725
440574	C1orf151	-0.2281	-0.779063	0.027	0.514725
767846	C1orf152	0.2457	0.745346	0.027	0.514725
51490	C9orf114	0.2438	0.74202	0.027	0.514725
55036	CCDC40	0.23876	0.733017	0.027	0.514725
27440	CECR5	-0.2462	-0.809557	0.027	0.514725
27292	DIMT1L	-0.2397	-0.799066	0.027	0.514725
1847	DUSP5	0.2348	0.725758	0.027	0.514725
3295	HSD17B4	-0.2263	-0.775807	0.027	0.514725
11279	KLF8	0.2433	0.741138	0.027	0.514725
389458	LOC389458	0.2446	0.743425	0.027	0.514725
56901	NDUFA4L2	0.2444	0.743074	0.027	0.514725
56288	PARD3	0.2386	0.732727	0.027	0.514725
51317	PHF21A	0.2341	0.724458	0.027	0.514725
5511	PPP1R8	-0.2289	-0.780496	0.027	0.514725
170679	PSORS1C1	0.24534	0.744719	0.027	0.514725
5917	RARS	-0.2408	-0.800876	0.027	0.514725
5054	SERPINE1	0.2297	0.716166	0.027	0.514725
9792	SERTAD2	0.2386	0.732727	0.027	0.514725
50944	SHANK1	0.246	0.745868	0.027	0.514725
84969	TOX2	0.2335	0.723339	0.027	0.514725
283629	TSSK4	0.2498	0.752399	0.027	0.514725
7323	UBE2D3	-0.2347	-0.790649	0.027	0.514725
55689	YEATS2	0.2415	0.737944	0.027	0.514725
169270	ZNF596	-0.23636	-0.793477	0.027	0.514725
79796	ALG9	-0.2346	-0.790477	0.028	0.517559
518	ATP5G3	-0.2375	-0.7954	0.028	0.517559
56033	BARX1	0.2453	0.744649	0.028	0.517559
663	BNIP2	0.2374	0.730543	0.028	0.517559
400798	C1orf220	0.24168	0.738265	0.028	0.517559
55262	C7orf43	0.2421	0.739012	0.028	0.517559
10576	CCT2	-0.2473	-0.811284	0.028	0.517559
200186	CRTC2	0.23551	0.727072	0.028	0.517559
1837	DTNA	0.2112	0.679005	0.028	0.517559
378805	FLJ43663	0.2405	0.736155	0.028	0.517559
3221	HOXC4	0.2379	0.731455	0.028	0.517559
388324	INCA1	0.2478	0.74898	0.028	0.517559
23028	KDM1A	-0.2361	-0.793036	0.028	0.517559
285033	LOC285033	0.2308	0.718258	0.028	0.517559
23363	OBSL1	0.2189	0.694929	0.028	0.517559
5032	P2RY11	0.2459	0.745694	0.028	0.517559
23532	PRAME	0.24674	0.747151	0.028	0.517559
26108	PYGO1	0.2444	0.743074	0.028	0.517559
10179	RBM7	-0.2276	-0.778162	0.028	0.517559
54581	SCAND2	0.2371	0.729994	0.028	0.517559
6478	SIAH2	0.22	0.69715	0.028	0.517559
6570	SLC18A1	-0.2471	-0.810971	0.028	0.517559
222962	SLC29A4	0.2422	0.73919	0.028	0.517559
26206	SPAG8	0.2503	0.753247	0.028	0.517559
7059	THBS3	0.2392	0.733813	0.028	0.517559
130612	TMEM198	0.218711	0.694546	0.028	0.517559
7248	TSC1	0.23578	0.72757	0.028	0.517559
10093	ARPC4	-0.2488	-0.813615	0.029	0.522739
54058	C21orf58	0.2388	0.73309	0.029	0.522739
441476	C9orf173	0.2468	0.747255	0.029	0.522739
57658	CALCOCO1	0.2418	0.738479	0.029	0.522739
23113	CUL9	0.23705	0.729903	0.029	0.522739
55789	DEPDC1B	-0.2245	-0.772509	0.029	0.522739
55635	DEPDC1	-0.2272	-0.77744	0.029	0.522739
10272	FSTL3	0.2186	0.694321	0.029	0.522739
51083	GAL	0.241712	0.738322	0.029	0.522739
64599	GIGYF1	0.2401	0.735436	0.029	0.522739
2700	GJA3	0.2402	0.735616	0.029	0.522739
3094	HINT1	-0.2348	-0.79082	0.029	0.522739
23526	HMHA1	0.2282	0.713292	0.029	0.522739
3187	HNRNPH1	-0.2397	-0.799066	0.029	0.522739
3643	INSR	0.2373	0.73036	0.029	0.522739
57582	KCNT1	0.2401	0.735436	0.029	0.522739
23484	LEPROTL1	-0.22832	-0.779458	0.029	0.522739
8643	PTCH2	0.2456	0.745172	0.029	0.522739
871	SERPINH1	0.2309	0.718448	0.029	0.522739
51375	SNX7	-0.2348	-0.79082	0.029	0.522739
6731	SRP72	-0.2389	-0.797739	0.029	0.522739
79735	TBC1D17	0.2367	0.729262	0.029	0.522739
51390	AIG1	-0.2466	-0.810187	0.03	0.522739
124401	ANKS3	0.2468	0.747255	0.03	0.522739
314	AOC2	0.2266	0.7102	0.03	0.522739
8639	AOC3	0.219	0.695132	0.03	0.522739
286076	BREA2	0.23995	0.735166	0.03	0.522739
100128569	C19orf71	0.2379	0.731455	0.03	0.522739
140828	C20orf56	-0.2287	-0.780139	0.03	0.522739
286257	C9orf142	0.24003	0.73531	0.03	0.522739
80152	CENPT	0.2375	0.730725	0.03	0.522739
80303	EFHD1	0.2399	0.735076	0.03	0.522739
2013	EMP2	-0.23425	-0.789876	0.03	0.522739
2114	ETS2	-0.2421	-0.802998	0.03	0.522739
23127	GLT25D2	0.2265	0.710006	0.03	0.522739
9653	HS2ST1	-0.2345	-0.790306	0.03	0.522739
8242	KDM5C	0.2665	0.779413	0.03	0.522739
23138	N4BP3	0.2371	0.729994	0.03	0.522739
4905	NSF	-0.2284	-0.779601	0.03	0.522739
56924	PAK6	0.2312	0.719016	0.03	0.522739
57661	PHRF1	0.2428	0.740254	0.03	0.522739
5365	PLXNB3	0.2268	0.710588	0.03	0.522739
5428	POLG	0.2369	0.729628	0.03	0.522739
10848	PPP1R13L	0.2225	0.702149	0.03	0.522739
23082	PPRC1	0.2448	0.743775	0.03	0.522739
255783	PRR24	0.2382	0.732	0.03	0.522739
203069	R3HCC1	-0.2312	-0.784573	0.03	0.522739
84991	RBM17	0.2398	0.734896	0.03	0.522739
6427	SFRS2	-0.2403	-0.800055	0.03	0.522739
6433	SFRS8	0.2381	0.731819	0.03	0.522739
353189	SLCO4C1	-0.25755	-0.826706	0.03	0.522739
79622	SNRNP25	-0.2406	-0.800548	0.03	0.522739
8089	YEATS4	-0.2424	-0.803485	0.03	0.522739
92822	ZNF276	0.2458	0.74552	0.03	0.522739
57505	AARS2	0.2259	0.708838	0.031	0.525774
128	ADH5	-0.2248	-0.773062	0.031	0.525774
84446	BRSK1	0.2241	0.705313	0.031	0.525774
80035	C15orf28	0.2368	0.729445	0.031	0.525774
996	CDC27	-0.2327	-0.787196	0.031	0.525774
26038	CHD5	0.2286	0.714061	0.031	0.525774
55810	FOXJ2	0.2418	0.738479	0.031	0.525774
8347	HIST1H2BC	0.2509	0.754262	0.031	0.525774
140862	ISM1	0.2372	0.730177	0.031	0.525774
22973	LAMB2L	0.2284	0.713677	0.031	0.525774
4054	LTBP3	0.2292	0.715211	0.031	0.525774
57149	LYRM1	-0.2373	-0.795064	0.031	0.525774
4319	MMP10	-0.2236	-0.770844	0.031	0.525774
23148	NACAD	0.2216	0.700357	0.031	0.525774
10316	NMUR1	0.2315	0.719583	0.031	0.525774
200035	NUDT17	0.2337	0.723713	0.031	0.525774
5162	PDHB	-0.2352	-0.791504	0.031	0.525774
146206	RLTPR	0.218	0.693102	0.031	0.525774
26001	RNF167	0.2211	0.699358	0.031	0.525774
388591	RNF207	0.237	0.729811	0.031	0.525774
6428	SFRS3	-0.2262	-0.775625	0.031	0.525774
6515	SLC2A3	0.2268	0.710588	0.031	0.525774
55504	TNFRSF19	0.2375	0.730725	0.031	0.525774
131601	TPRA1	0.2401	0.735436	0.031	0.525774
92181	UBTD2	-0.23687	-0.794339	0.031	0.525774
57538	ALPK3	0.22903	0.714885	0.032	0.525774
127829	ARL8A	0.2296	0.715975	0.032	0.525774
114900	C1QTNF4	0.2331	0.722592	0.032	0.525774
84317	CCDC115	0.22525	0.707569	0.032	0.525774
83987	CCDC8	0.2268	0.710588	0.032	0.525774
166012	CHST13	0.2411	0.737229	0.032	0.525774
51192	CKLF	-0.23747	-0.795349	0.032	0.525774
1213	CLTC	-0.2425	-0.803647	0.032	0.525774
84923	FAM104A	-0.2341	-0.789618	0.032	0.525774
8928	FOXH1	0.2443	0.742899	0.032	0.525774
2717	GLA	-0.2304	-0.783163	0.032	0.525774
8351	HIST1H3D	0.2399	0.735076	0.032	0.525774
26173	INTS1	0.2408	0.736693	0.032	0.525774
55818	KDM3A	0.23634	0.728601	0.032	0.525774
9907	KIAA0415	0.2234	0.703932	0.032	0.525774
147727	LOC147727	0.23682	0.729481	0.032	0.525774
4085	MAD2L1	-0.231	-0.784221	0.032	0.525774
4242	MFNG	0.226	0.709033	0.032	0.525774
65080	MRPL44	-0.2301	-0.782632	0.032	0.525774
92259	MRPS36	-0.236	-0.792867	0.032	0.525774
119369	NUDT9P1	0.232	0.720526	0.032	0.525774
114880	OSBPL6	0.2209	0.698958	0.032	0.525774
5621	PRNP	0.2224	0.701951	0.032	0.525774
5805	PTS	-0.2292	-0.781032	0.032	0.525774
7884	SLBP	-0.2335	-0.788583	0.032	0.525774
6838	SURF6	0.2298	0.716357	0.032	0.525774
7169	TPM2	0.2194	0.69594	0.032	0.525774
10867	TSPAN9	0.2335	0.723339	0.032	0.525774
7419	VDAC3	-0.2195	-0.763126	0.032	0.525774
155368	WBSCR27	0.2137	0.684247	0.032	0.525774
3104	ZBTB48	0.2308	0.718258	0.032	0.525774
285676	ZNF454	0.2402	0.735616	0.032	0.525774
220	ALDH1A3	0.2358	0.727607	0.033	0.526487
340591	CA5BP	0.2571	0.764541	0.033	0.526487
836	CASP3	-0.224	-0.771585	0.033	0.526487
875	CBS	0.2233	0.703734	0.033	0.526487
54480	CHPF2	0.2207	0.698557	0.033	0.526487
6320	CLEC11A	0.2174	0.691879	0.033	0.526487
9231	DLG5	0.2392	0.733813	0.033	0.526487
283807	FBXL22	0.2229	0.702943	0.033	0.526487
91010	FMNL3	0.2184	0.693915	0.033	0.526487
134266	GRPEL2	-0.2233	-0.770287	0.033	0.526487
253018	HCG27	0.2367	0.729262	0.033	0.526487
8343	HIST1H2BF	0.2492	0.751377	0.033	0.526487
100131434	LOC100131434	0.2375	0.730725	0.033	0.526487
550643	LOC550643	0.223	0.703141	0.033	0.526487
23531	MMD	-0.2308	-0.783869	0.033	0.526487
4772	NFATC1	0.2316	0.719772	0.033	0.526487
23386	NUDCD3	0.222407	0.701964	0.033	0.526487
284451	ODF3L2	0.239	0.733452	0.033	0.526487
5339	PLEC	0.2288	0.714445	0.033	0.526487
10733	PLK4	-0.2266	-0.776352	0.033	0.526487
58506	SCAF1	0.2183	0.693712	0.033	0.526487
57533	TBC1D14	-0.2377	-0.795735	0.033	0.526487
8557	TCAP	0.2172	0.69147	0.033	0.526487
113277	TMEM106A	0.2237	0.704524	0.033	0.526487
8792	TNFRSF11A	-0.2293	-0.78121	0.033	0.526487
7185	TRAF1	0.2285	0.713869	0.033	0.526487
10131	TRAP1	-0.2382	-0.796573	0.033	0.526487
7706	TRIM25	-0.2402	-0.79989	0.033	0.526487
27	ABL2	0.2304	0.717499	0.034	0.526487
375790	AGRN	0.2323	0.721091	0.034	0.526487
79798	ARMC5	0.2372	0.730177	0.034	0.526487
6369	CCL24	-0.2262	-0.775625	0.034	0.526487
890	CCNA2	-0.2263	-0.775807	0.034	0.526487
9377	COX5A	-0.2329	-0.787543	0.034	0.526487
9785	DHX38	0.2364	0.728711	0.034	0.526487
1738	DLD	-0.2371	-0.794727	0.034	0.526487
144132	DNHD1	0.23038	0.717461	0.034	0.526487
55520	ELAC1	-0.2304	-0.783163	0.034	0.526487
2048	EPHB2	-0.2257	-0.774712	0.034	0.526487
201627	FAM116A	-0.2217	-0.767295	0.034	0.526487
54629	FAM63B	0.2276	0.712136	0.034	0.526487
2224	FDPS	-0.2231	-0.769915	0.034	0.526487
26301	GBGT1	0.2265	0.710006	0.034	0.526487
57520	HECW2	0.2277	0.712329	0.034	0.526487
55600	ITLN1	-0.2252	-0.773796	0.034	0.526487
30819	KCNIP2	0.2337	0.723713	0.034	0.526487
93621	MRFAP1	-0.2298	-0.7821	0.034	0.526487
4830	NME1	-0.2434	-0.805099	0.034	0.526487
9891	NUAK1	0.2235	0.70413	0.034	0.526487
5101	PCDH9	0.2227	0.702546	0.034	0.526487
5464	PPA1	-0.2351	-0.791333	0.034	0.526487
727800	RNF208	0.2285	0.713869	0.034	0.526487
11102	RPP14	-0.2327	-0.787196	0.034	0.526487
8034	SLC25A16	-0.2187	-0.761594	0.034	0.526487
6619	SNAPC3	0.2376	0.730908	0.034	0.526487
54974	THG1L	-0.2225	-0.768795	0.034	0.526487
59341	TRPV4	0.2342	0.724644	0.034	0.526487
81628	TSC22D4	0.2297	0.716166	0.034	0.526487
51096	UTP18	-0.2338	-0.789101	0.034	0.526487
155061	ZNF746	0.21004	0.676548	0.034	0.526487
7589	ZSCAN21	0.2213	0.699758	0.034	0.526487
27236	ARFIP1	-0.2297	-0.781922	0.035	0.528996
515	ATP5F1	-0.2137	-0.751824	0.035	0.528996
112849	C14orf149	0.232	0.720526	0.035	0.528996
26505	CNNM3	0.2304	0.717499	0.035	0.528996
1616	DAXX	0.2182	0.693509	0.035	0.528996
1650	DDOST	-0.21178	-0.747982	0.035	0.528996
1742	DLG4	0.2319	0.720338	0.035	0.528996
9941	EXOG	-0.2236	-0.770844	0.035	0.528996
51608	GET4	0.21432	0.685537	0.035	0.528996
199720	GGN	0.2153	0.687566	0.035	0.528996
114823	LENG8	0.224	0.705116	0.035	0.528996
115399	LRRC56	0.2321	0.720714	0.035	0.528996
197187	MGC23284	0.229	0.714828	0.035	0.528996
5516	PPP2CB	-0.2286	-0.77996	0.035	0.528996
387849	REP15	-0.2233	-0.770287	0.035	0.528996
6195	RPS6KA1	-0.2177	-0.759667	0.035	0.528996
25813	SAMM50	-0.2224	-0.768608	0.035	0.528996
6391	SDHC	-0.237	-0.794558	0.035	0.528996
9351	SLC9A3R2	0.2235	0.70413	0.035	0.528996
285955	SPDYE1	0.2349	0.725944	0.035	0.528996
140901	STK35	0.2138	0.684456	0.035	0.528996
27347	STK39	-0.2219	-0.767671	0.035	0.528996
7186	TRAF2	0.2255	0.708058	0.035	0.528996
7384	UQCRC1	-0.2405	-0.800384	0.035	0.528996
7425	VGF	0.2117	0.680059	0.035	0.528996
9213	XPR1	-0.2237	-0.77103	0.035	0.528996
55028	C17orf80	-0.2246	-0.772693	0.036	0.535724
285051	C2orf61	0.2333	0.722966	0.036	0.535724
56853	CELF4	0.233	0.722404	0.036	0.535724
5611	DNAJC3	-0.2099	-0.744171	0.036	0.535724
344875	DVWA	0.22	0.69715	0.036	0.535724
157574	FBXO16	-0.22381	-0.771234	0.036	0.535724
4616	GADD45B	0.2226	0.702348	0.036	0.535724
2736	GLI2	0.2233	0.703734	0.036	0.535724
654466	KGFLP2	0.2314	0.719394	0.036	0.535724
51176	LEF1	0.226	0.709033	0.036	0.535724
387647	LOC387647	0.2258	0.708643	0.036	0.535724
8379	MAD1L1	0.21753	0.692144	0.036	0.535724
5250	SLC25A3	-0.234879	-0.790955	0.036	0.535724
503542	SPRN	0.2244	0.705903	0.036	0.535724
9322	TRIP10	0.2374	0.730543	0.036	0.535724
7582	ZNF33B	0.2301	0.716928	0.036	0.535724
100131827	ZNF717	0.2214	0.699958	0.036	0.535724
645851	?	0.22705	0.711072	0.037	0.53888
482	ATP1B2	0.2183	0.693712	0.037	0.53888
498	ATP5A1	-0.2119	-0.748224	0.037	0.53888
2583	B4GALNT1	0.2245	0.706099	0.037	0.53888
84553	C6orf168	0.2017	0.65844	0.037	0.53888
199731	CADM4	0.2378	0.731272	0.037	0.53888
26093	CCDC9	0.2264	0.709811	0.037	0.53888
892	CCNC	-0.2278	-0.778523	0.037	0.53888
10693	CCT6B	-0.2303	-0.782986	0.037	0.53888
51148	CERCAM	0.2187	0.694524	0.037	0.53888
10683	DLL3	0.2397	0.734716	0.037	0.53888
84173	ELMOD3	0.2403	0.735796	0.037	0.53888
2517	FUCA1	-0.2226	-0.768982	0.037	0.53888
23421	ITGB3BP	-0.2211	-0.766165	0.037	0.53888
5064	PALM	0.2128	0.682368	0.037	0.53888
29941	PKN3	0.2288	0.714445	0.037	0.53888
9861	PSMD6	-0.234	-0.789446	0.037	0.53888
25898	RCHY1	-0.2235	-0.770659	0.037	0.53888
9092	SART1	0.2377	0.73109	0.037	0.53888
344558	SH3RF3	0.2222	0.701553	0.037	0.53888
6722	SRF	0.2249	0.706884	0.037	0.53888
284612	SYPL2	0.2245	0.706099	0.037	0.53888
55831	TMEM111	-0.2242	-0.771955	0.037	0.53888
55761	TTC17	0.222143	0.70144	0.037	0.53888
10449	ACAA2	-0.22365	-0.770937	0.038	0.542376
262	AMD1	-0.2227	-0.769169	0.038	0.542376
666	BOK	0.2168	0.690651	0.038	0.542376
8558	CDK10	0.2255	0.708058	0.038	0.542376
22802	CLCA4	-0.22873	-0.780192	0.038	0.542376
284131	FLJ35220	0.2027	0.660653	0.038	0.542376
9908	G3BP2	-0.2278	-0.778523	0.038	0.542376
10220	GDF11	0.2386	0.732727	0.038	0.542376
3035	HARS	-0.21693	-0.758174	0.038	0.542376
3764	KCNJ8	0.2171	0.691266	0.038	0.542376
85442	KNDC1	0.2193	0.695738	0.038	0.542376
9520	NPEPPS	-0.2207	-0.765408	0.038	0.542376
5051	PAFAH2	-0.2138	-0.752023	0.038	0.542376
2889	RAPGEF1	0.2314	0.719394	0.038	0.542376
10609	SC65	0.2284	0.713677	0.038	0.542376
9117	SEC22C	-0.2261	-0.775442	0.038	0.542376
56164	STK31	0.22187	0.700896	0.038	0.542376
134957	STXBP5	-0.234433	-0.790191	0.038	0.542376
9913	SUPT7L	0.216	0.689009	0.038	0.542376
6915	TBXA2R	0.2144	0.685703	0.038	0.542376
1200	TPP1	0.2123	0.68132	0.038	0.542376
7205	TRIP6	0.2304	0.717499	0.038	0.542376
79724	ZNF768	0.2226	0.702348	0.038	0.542376
79814	AGMAT	-0.2205	-0.765029	0.039	0.544342
761	CA3	0.225	0.70708	0.039	0.544342
899	CCNF	-0.2312	-0.784573	0.039	0.544342
998	CDC42	-0.2171	-0.758504	0.039	0.544342
348174	CLEC18A	0.2295	0.715784	0.039	0.544342
8475	EPR1	-0.2154	-0.755184	0.039	0.544342
11082	ESM1	0.229219	0.715247	0.039	0.544342
2150	F2RL1	-0.22576	-0.774822	0.039	0.544342
126433	FBXO27	0.2299	0.716547	0.039	0.544342
7976	FZD3	-0.2139	-0.752221	0.039	0.544342
79411	GLB1L	0.222	0.701155	0.039	0.544342
2788	GNG7	0.2162	0.68942	0.039	0.544342
3270	HRC	0.2205	0.698156	0.039	0.544342
3598	IL13RA2	-0.2307	-0.783692	0.039	0.544342
81621	KAZALD1	0.23	0.716738	0.039	0.544342
51305	KCNK9	0.2262	0.709422	0.039	0.544342
23030	KDM4B	0.2198	0.696747	0.039	0.544342
728392	LOC728392	0.2131	0.682996	0.039	0.544342
26231	LRRC29	0.2245	0.706099	0.039	0.544342
9258	MFHAS1	-0.22184	-0.767558	0.039	0.544342
84628	NTNG2	0.2143	0.685495	0.039	0.544342
283208	P4HA3	0.224	0.705116	0.039	0.544342
91608	RASL10B	0.22198	0.701115	0.039	0.544342
5267	SERPINA4	0.2189	0.694929	0.039	0.544342
100131211	TMEM194B	0.2062	0.668309	0.039	0.544342
26140	TTLL3	0.2271	0.711169	0.039	0.544342
145447	ABHD12B	0.2357	0.727422	0.04	0.546678
11217	AKAP2	0.2258	0.708643	0.04	0.546678
9854	C2CD2L	0.22089	0.698938	0.04	0.546678
343990	C2orf55	0.22141	0.699978	0.04	0.546678
55286	C4orf19	-0.2133	-0.751028	0.04	0.546678
402573	C7orf61	0.2137	0.684247	0.04	0.546678
6367	CCL22	-0.206	-0.736108	0.04	0.546678
126129	CPT1C	0.2248	0.706688	0.04	0.546678
163933	FAM43B	0.2241	0.705313	0.04	0.546678
117248	GALNTL2	0.2126	0.681949	0.04	0.546678
10014	HDAC5	0.2232	0.703537	0.04	0.546678
3182	HNRNPAB	-0.20882	-0.741959	0.04	0.546678
3960	LGALS4	-0.2117	-0.747821	0.04	0.546678
56262	LRRC8A	0.2221	0.701354	0.04	0.546678
4534	MTM1	-0.2235	-0.770659	0.04	0.546678
22909	MTMR15	0.2082	0.672621	0.04	0.546678
23522	MYST4	0.2302	0.717119	0.04	0.546678
113791	PIK3IP1	0.2355	0.727053	0.04	0.546678
127435	PODN	0.2185	0.694118	0.04	0.546678
25759	SHC2	0.224554	0.706205	0.04	0.546678
6494	SIPA1	0.2203	0.697754	0.04	0.546678
6710	SPTB	0.2312	0.719016	0.04	0.546678
112755	STX1B	0.2231	0.703339	0.04	0.546678
80145	THOC7	-0.2229	-0.769542	0.04	0.546678
81027	TUBB1	-0.2248	-0.773062	0.04	0.546678
9138	ARHGEF1	0.21013	0.67674	0.041	0.550715
63035	BCORL1	0.2123	0.68132	0.041	0.550715
644809	C15orf56	0.216781	0.690613	0.041	0.550715
64755	C16orf58	0.22082	0.698798	0.041	0.550715
4849	CNOT3	0.2181	0.693305	0.041	0.550715
1479	CSTF3	-0.2202	-0.76446	0.041	0.550715
3338	DNAJC4	0.2111	0.678794	0.041	0.550715
92292	GLYATL1	-0.2193	-0.762744	0.041	0.550715
27239	GPR162	0.213	0.682787	0.041	0.550715
253012	HEPACAM2	-0.2219	-0.767671	0.041	0.550715
3223	HOXC6	0.2189	0.694929	0.041	0.550715
3236	HOXD10	0.2137	0.684247	0.041	0.550715
9956	HS3ST2	0.2169	0.690856	0.041	0.550715
23107	MRPS27	-0.2104	-0.745189	0.041	0.550715
23026	MYO16	0.2333	0.722966	0.041	0.550715
57162	PELI1	0.2251	0.707276	0.041	0.550715
22864	R3HDM2	0.214379	0.685659	0.041	0.550715
222068	TMED4	0.2141	0.68508	0.041	0.550715
84629	TNRC18	0.20958	0.67557	0.041	0.550715
55062	WIPI1	-0.2284	-0.779601	0.041	0.550715
100129482	ZNF37B	0.2175	0.692083	0.041	0.550715
126549	ANKLE1	0.2199	0.696949	0.042	0.552394
55107	ANO1	0.219	0.695132	0.042	0.552394
10620	ARID3B	0.22	0.69715	0.042	0.552394
147081	C17orf69	0.22097	0.699098	0.042	0.552394
1025	CDK9	0.2218	0.700756	0.042	0.552394
25978	CHMP2B	-0.224	-0.771585	0.042	0.552394
22796	COG2	-0.2147	-0.753805	0.042	0.552394
51380	CSAD	0.2247	0.706492	0.042	0.552394
1489	CTF1	0.2105	0.677524	0.042	0.552394
54808	DYM	-0.2085	-0.741301	0.042	0.552394
1859	DYRK1A	0.2177	0.692491	0.042	0.552394
283229	EFCAB4A	0.2251	0.707276	0.042	0.552394
355	FAS	-0.2127	-0.749829	0.042	0.552394
26261	FBXO24	0.2265	0.710006	0.042	0.552394
121504	HIST4H4	0.23501	0.726147	0.042	0.552394
3416	IDE	-0.2087	-0.741712	0.042	0.552394
90865	IL33	-0.2079	-0.740062	0.042	0.552394
4025	LPO	0.21297	0.682724	0.042	0.552394
8425	LTBP4	0.2299	0.716547	0.042	0.552394
56917	MEIS3	0.2123	0.68132	0.042	0.552394
57708	MIER1	-0.2136	-0.751625	0.042	0.552394
4482	MSRA	-0.2226	-0.768982	0.042	0.552394
55800	SCN3B	0.2046	0.664826	0.042	0.552394
10959	TMED2	-0.2195	-0.763126	0.042	0.552394
23559	WBP1	0.225	0.70708	0.042	0.552394
7584	ZNF35	-0.2165	-0.757337	0.042	0.552394
84869	CBR4	-0.2238	-0.771215	0.043	0.554876
79643	CHMP6	-0.22666	-0.776461	0.043	0.554876
6376	CX3CL1	0.2096	0.675613	0.043	0.554876
10671	DCTN6	-0.21808	-0.760401	0.043	0.554876
1655	DDX5	-0.2237	-0.77103	0.043	0.554876
23770	FKBP8	0.2123	0.68132	0.043	0.554876
8479	HIRIP3	0.2249	0.706884	0.043	0.554876
3237	HOXD11	0.2138	0.684456	0.043	0.554876
8517	IKBKG	0.2181	0.693305	0.043	0.554876
56623	INPP5E	0.218	0.693102	0.043	0.554876
51194	IPO11	-0.2133	-0.751028	0.043	0.554876
100134259	LOC100134259	0.2186	0.694321	0.043	0.554876
100272228	LOC100272228	0.2226	0.702348	0.043	0.554876
255252	LRRC57	0.22318	0.703497	0.043	0.554876
8085	MLL2	0.2323	0.721091	0.043	0.554876
9853	RUSC2	0.2154	0.687773	0.043	0.554876
27284	SULT1B1	-0.2157	-0.755773	0.043	0.554876
7024	TFCP2	0.222176	0.701505	0.043	0.554876
84233	TMEM126A	-0.2161	-0.756556	0.043	0.554876
79931	TNIP3	-0.2113	-0.747014	0.043	0.554876
253769	WDR27	0.2204	0.697955	0.043	0.554876
55063	ZCWPW1	0.2061	0.668092	0.043	0.554876
25946	ZNF385A	0.2079	0.671977	0.043	0.554876
93134	ZNF561	-0.2148	-0.754003	0.043	0.554876
80325	ABTB1	0.2296	0.715975	0.044	0.558127
36	ACADSB	-0.2074	-0.739027	0.044	0.558127
829	CAPZA1	-0.2118	-0.748022	0.044	0.558127
23492	CBX7	0.2111	0.678794	0.044	0.558127
1410	CRYAB	0.2065	0.668958	0.044	0.558127
8029	CUBN	0.2183	0.693712	0.044	0.558127
51523	CXXC5	-0.2133	-0.751028	0.044	0.558127
51635	DHRS7	0.2226	0.702348	0.044	0.558127
55192	DNAJC17	0.2122	0.68111	0.044	0.558127
157570	ESCO2	-0.2086	-0.741507	0.044	0.558127
84668	FAM126A	0.209	0.674333	0.044	0.558127
2624	GATA2	0.2019	0.658883	0.044	0.558127
219347	LOC219347	0.208	0.672192	0.044	0.558127
401588	LOC401588	0.2166	0.690242	0.044	0.558127
27035	NOX1	-0.2058	-0.735688	0.044	0.558127
5420	PODXL	0.2046	0.664826	0.044	0.558127
158787	RIBC1	0.2163	0.689626	0.044	0.558127
11182	SLC2A6	0.2088	0.673906	0.044	0.558127
23516	SLC39A14	-0.2114	-0.747216	0.044	0.558127
9014	TAF1B	-0.2205	-0.765029	0.044	0.558127
129303	TMEM150A	0.224	0.705116	0.044	0.558127
79175	ZNF343	0.1996	0.653755	0.044	0.558127
53947	A4GALT	0.202	0.659105	0.045	0.560843
9719	ADAMTSL2	0.2172	0.69147	0.045	0.560843
1388	ATF6B	0.2024	0.65999	0.045	0.560843
140947	C5orf20	-0.22161	-0.767126	0.045	0.560843
375757	C9orf119	0.20674	0.669477	0.045	0.560843
171425	CLYBL	-0.2116	-0.747619	0.045	0.560843
8449	DHX16	0.2076	0.671332	0.045	0.560843
375513	GUSBL2	0.22155	0.700258	0.045	0.560843
8367	HIST1H4E	0.2211	0.699358	0.045	0.560843
378465	HSN2	0.2285	0.713869	0.045	0.560843
83700	JAM3	0.2009	0.656661	0.045	0.560843
163782	KANK4	0.2215	0.700158	0.045	0.560843
55384	MEG3	0.22	0.69715	0.045	0.560843
55052	MRPL20	-0.2081	-0.740476	0.045	0.560843
359821	MRPL42P5	0.215744	0.688482	0.045	0.560843
4706	NDUFAB1	-0.223	-0.769729	0.045	0.560843
4882	NPR2	0.212	0.68069	0.045	0.560843
9924	PAN2	0.216	0.689009	0.045	0.560843
5207	PFKFB1	0.2295	0.715784	0.045	0.560843
29015	SLC43A3	0.208	0.672192	0.045	0.560843
10090	UST	0.2038	0.663074	0.045	0.560843
29799	YPEL1	0.2328	0.72203	0.045	0.560843
79797	ZNF408	0.2179	0.692898	0.045	0.560843
160428	ALDH1L2	0.2057	0.667223	0.046	0.564308
554	AVPR2	0.2125	0.68174	0.046	0.564308
79864	C11orf63	0.2169	0.690856	0.046	0.564308
64207	C14orf4	0.2132	0.683205	0.046	0.564308
388135	C15orf59	0.2058	0.667441	0.046	0.564308
92340	C17orf72	0.2103	0.6771	0.046	0.564308
140706	C20orf160	0.2102	0.676888	0.046	0.564308
100132403	FAM157B	0.2267	0.710394	0.046	0.564308
2894	GRID1	0.2065	0.668958	0.046	0.564308
55132	LARP1B	-0.208	-0.740269	0.046	0.564308
642846	LOC642846	0.229	0.714828	0.046	0.564308
4204	MECP2	0.2133	0.683413	0.046	0.564308
57326	PBXIP1	0.216	0.689009	0.046	0.564308
10015	PDCD6IP	-0.2266	-0.776352	0.046	0.564308
10081	PDCD7	0.2103	0.6771	0.046	0.564308
5634	PRPS2	-0.2095	-0.743354	0.046	0.564308
10180	RBM6	0.2158	0.688597	0.046	0.564308
27290	SPINK4	-0.2075	-0.739234	0.046	0.564308
7385	UQCRC2	-0.2056	-0.735268	0.046	0.564308
51699	VPS29	-0.22094	-0.765862	0.046	0.564308
118813	ZFYVE27	0.21524	0.687442	0.046	0.564308
81794	ADAMTS10	0.2115	0.679638	0.047	0.567666
374569	ASPG	-0.2298	-0.7821	0.047	0.567666
28990	ASTE1	0.2185	0.694118	0.047	0.567666
8209	C21orf33	0.2103	0.6771	0.047	0.567666
1592	CYP26A1	0.2226	0.702348	0.047	0.567666
283417	DPY19L2	0.217	0.691061	0.047	0.567666
9775	EIF4A3	-0.2173	-0.758893	0.047	0.567666
23307	FKBP15	0.2201	0.697352	0.047	0.567666
23438	HARS2	-0.2138	-0.752023	0.047	0.567666
3486	IGFBP3	0.2084	0.67305	0.047	0.567666
79649	MAP7D3	0.2016	0.658218	0.047	0.567666
64802	NMNAT1	-0.2066	-0.737362	0.047	0.567666
267004	PGBD3	0.214	0.684872	0.047	0.567666
123228	SENP8	-0.211	-0.746407	0.047	0.567666
84068	SLC10A7	-0.2091	-0.742534	0.047	0.567666
81619	TSPAN14	0.2238	0.704722	0.047	0.567666
51060	TXNDC12	-0.2063	-0.736735	0.047	0.567666
7334	UBE2N	-0.2187	-0.761594	0.047	0.567666
140685	ZBTB46	0.213	0.682787	0.047	0.567666
653808	ZG16	-0.2111	-0.746609	0.047	0.567666
146050	ZSCAN29	0.2136	0.684039	0.047	0.567666
215	ABCD1	0.1979	0.649925	0.048	0.570922
84726	BAT2L1	0.2051	0.665918	0.048	0.570922
92922	CCDC102A	0.2021	0.659326	0.048	0.570922
8483	CILP	0.1977	0.649473	0.048	0.570922
55847	CISD1	-0.2163	-0.756947	0.048	0.570922
1362	CPD	-0.2167	-0.757727	0.048	0.570922
9787	DLGAP5	-0.2106	-0.745596	0.048	0.570922
100192386	FLJ16779	0.2179	0.692898	0.048	0.570922
2672	GFI1	-0.2115	-0.747418	0.048	0.570922
388588	LOC388588	0.2102	0.676888	0.048	0.570922
284739	NCRNA00176	0.2159	0.688803	0.048	0.570922
10529	NEBL	-0.219	-0.76217	0.048	0.570922
11165	NUDT3	0.2159	0.688803	0.048	0.570922
7732	RNF112	0.2049	0.665481	0.048	0.570922
55238	SLC38A7	0.2099	0.676251	0.048	0.570922
56907	SPIRE1	0.1996	0.653755	0.048	0.570922
51204	TACO1	-0.2196	-0.763317	0.048	0.570922
199964	TMEM61	-0.2176	-0.759474	0.048	0.570922
63923	TNN	0.2329	0.722217	0.048	0.570922
81629	TSSK3	0.226	0.709033	0.048	0.570922
344787	ZNF860	0.22172	0.700597	0.048	0.570922
245973	ATP6V1C2	0.2264	0.709811	0.049	0.573759
8938	BAIAP3	0.2039	0.663293	0.049	0.573759
387104	C6orf174	0.209	0.674333	0.049	0.573759
65981	CAPRIN2	0.208	0.672192	0.049	0.573759
1666	DECR1	-0.2051	-0.734216	0.049	0.573759
9002	F2RL3	0.2124	0.68153	0.049	0.573759
60343	FAM3A	0.2072	0.670471	0.049	0.573759
2901	GRIK5	0.2106	0.677736	0.049	0.573759
387755	INSC	-0.2131	-0.750629	0.049	0.573759
83552	MFRP	0.2044	0.664389	0.049	0.573759
5310	PKD1	0.2205	0.698156	0.049	0.573759
10714	POLD3	-0.2119	-0.748224	0.049	0.573759
10935	PRDX3	-0.2042	-0.732314	0.049	0.573759
55278	QRSL1	-0.2123	-0.749028	0.049	0.573759
284439	SLC25A42	0.2189	0.694929	0.049	0.573759
26032	SUSD5	0.2103	0.6771	0.049	0.573759
55852	TEX2	-0.214	-0.75242	0.049	0.573759
64801	ARV1	-0.1988	-0.720656	0.05	0.573759
534	ATP6V1G2	0.2063	0.668525	0.05	0.573759
201895	C4orf34	-0.2196	-0.763317	0.05	0.573759
794	CALB2	0.2111	0.678794	0.05	0.573759
92558	CCDC64	0.196	0.645606	0.05	0.573759
54951	COMMD8	-0.2101	-0.744579	0.05	0.573759
2028	ENPEP	0.2152	0.68736	0.05	0.573759
2134	EXTL1	0.2165	0.690036	0.05	0.573759
440078	FAM66C	0.2062	0.668309	0.05	0.573759
10922	FASTK	0.2199	0.696949	0.05	0.573759
3612	IMPA1	-0.2102	-0.744782	0.05	0.573759
387787	LIPT2	-0.2117	-0.747821	0.05	0.573759
56413	LTB4R2	0.212	0.68069	0.05	0.573759
4353	MPO	0.21	0.676463	0.05	0.573759
9722	NOS1AP	0.2041	0.663732	0.05	0.573759
9369	NRXN3	0.1992	0.652857	0.05	0.573759
11247	NXPH4	0.21	0.676463	0.05	0.573759
5191	PEX7	-0.2107	-0.745799	0.05	0.573759
10761	PLAC1	0.2179	0.692898	0.05	0.573759
9651	PLCH2	0.20675	0.669499	0.05	0.573759
8541	PPFIA3	0.2156	0.688185	0.05	0.573759
9733	SART3	0.2096	0.675613	0.05	0.573759
10507	SEMA4D	0.2144	0.685703	0.05	0.573759
5271	SERPINB8	-0.2095	-0.743354	0.05	0.573759
6601	SMARCC2	0.2139	0.684664	0.05	0.573759
751867	SNHG3-RCC1	-0.21004	-0.744456	0.05	0.573759
169981	SPIN3	0.2098	0.676038	0.05	0.573759
92715	WDR85	0.2167	0.690447	0.05	0.573759
10472	ZNF238	-0.2013	-0.726105	0.05	0.573759
57541	ZNF398	0.2038	0.663074	0.05	0.573759
55565	ZNF821	0.2151	0.687153	0.05	0.573759
633	BGN	0.212	0.68069	0.051	0.573759
801	CALM1	-0.2089	-0.742124	0.051	0.573759
80323	CCDC68	-0.213	-0.750429	0.051	0.573759
56477	CCL28	-0.2099	-0.744171	0.051	0.573759
9391	CIAO1	0.21101	0.678604	0.051	0.573759
1856	DVL2	0.2007	0.656215	0.051	0.573759
79813	EHMT1	0.2077	0.671547	0.051	0.573759
114794	ELFN2	0.2061	0.668092	0.051	0.573759
23149	FCHO1	0.2108	0.67816	0.051	0.573759
2560	GABRB1	-0.2336	-0.788756	0.051	0.573759
55592	GOLGA2B	0.2191	0.695334	0.051	0.573759
3313	HSPA9	-0.212	-0.748425	0.051	0.573759
285830	LOC285830	0.2033	0.661975	0.051	0.573759
8567	MADD	0.2119	0.68048	0.051	0.573759
4258	MGST2	-0.2124	-0.749228	0.051	0.573759
54587	MXRA8	0.205	0.665699	0.051	0.573759
80862	NCRNA00171	0.2051	0.665918	0.051	0.573759
56654	NPDC1	0.2132	0.683205	0.051	0.573759
7376	NR1H2	0.202	0.659105	0.051	0.573759
5555	PRH2	0.2249	0.706884	0.051	0.573759
6522	SLC4A2	0.2149	0.686739	0.051	0.573759
7031	TFF1	-0.1953	-0.712874	0.051	0.573759
147138	TMC8	0.2137	0.684247	0.051	0.573759
51014	TMED7	-0.2101	-0.744579	0.051	0.573759
7145	TNS1	0.195	0.643316	0.051	0.573759
10376	TUBA1B	-0.21378	-0.751983	0.051	0.573759
8237	USP11	0.2071	0.670255	0.051	0.573759
10269	ZMPSTE24	-0.2166	-0.757532	0.051	0.573759
54753	ZNF853	0.2082	0.672621	0.051	0.573759
54993	ZSCAN2	0.2134	0.683622	0.051	0.573759
79364	ZXDC	0.2179	0.692898	0.051	0.573759
11332	ACOT7	-0.20641	-0.736965	0.052	0.575541
9495	AKAP5	-0.2035	-0.730826	0.052	0.575541
285	ANGPT2	0.2084	0.67305	0.052	0.575541
54859	C3orf75	-0.22133	-0.766599	0.052	0.575541
202243	CCDC125	-0.2069	-0.737987	0.052	0.575541
1106	CHD2	0.2149	0.686739	0.052	0.575541
1499	CTNNB1	-0.2043	-0.732526	0.052	0.575541
79980	DSN1	-0.2075	-0.739234	0.052	0.575541
90332	EXOC3L2	0.21	0.676463	0.052	0.575541
8908	GYG2	-0.2042	-0.732314	0.052	0.575541
57689	LRRC4C	0.2169	0.690856	0.052	0.575541
10299	2015-03-06	0.2088	0.673906	0.052	0.575541
4776	NFATC4	0.2162	0.68942	0.052	0.575541
4804	NGFR	0.1939	0.640783	0.052	0.575541
5089	PBX2	0.2096	0.675613	0.052	0.575541
161779	PGBD4	0.2053	0.666353	0.052	0.575541
5330	PLCB2	0.2018	0.658661	0.052	0.575541
5361	PLXNA1	0.2171	0.691266	0.052	0.575541
10940	POP1	-0.2255	-0.774346	0.052	0.575541
26469	PTPN18	0.2109	0.678371	0.052	0.575541
51734	SEPX1	-0.21356	-0.751546	0.052	0.575541
6712	SPTBN2	0.2101	0.676676	0.052	0.575541
7075	TIE1	0.2031	0.661535	0.052	0.575541
55884	WSB2	-0.2106	-0.745596	0.052	0.575541
29929	ALG6	-0.2022	-0.728045	0.053	0.576885
79135	APOO	-0.2066	-0.737362	0.053	0.576885
10123	ARL4C	0.2053	0.666353	0.053	0.576885
388962	BOLA3	-0.2119	-0.748224	0.053	0.576885
9577	BRE	-0.2094	-0.743149	0.053	0.576885
23473	CAPN7	-0.2086	-0.741507	0.053	0.576885
84701	COX4I2	0.2016	0.658218	0.053	0.576885
79993	ELOVL7	-0.2048	-0.733584	0.053	0.576885
2687	GGT5	0.2098	0.676038	0.053	0.576885
80273	GRPEL1	-0.2114	-0.747216	0.053	0.576885
100130086	HSFX2	0.2121	0.6809	0.053	0.576885
51056	LAP3	-0.2093	-0.742944	0.053	0.576885
114785	MBD6	0.2006	0.655992	0.053	0.576885
63941	NECAB3	0.21279	0.682347	0.053	0.576885
5116	PCNT	0.2153	0.687566	0.053	0.576885
9762	ProSAPiP1	0.2088	0.673906	0.053	0.576885
117584	RFFL	-0.2096	-0.743558	0.053	0.576885
55197	RPRD1A	-0.2087	-0.741712	0.053	0.576885
25956	SEC31B	0.2215	0.700158	0.053	0.576885
91252	SLC39A13	0.2099	0.676251	0.053	0.576885
6664	SOX11	0.2163	0.689626	0.053	0.576885
55665	URGCP	0.20629	0.668504	0.053	0.576885
84292	WDR83	0.1979	0.649925	0.053	0.576885
221527	ZBTB12	0.2093	0.674974	0.053	0.576885
171017	ZNF384	0.2155	0.687979	0.053	0.576885
29882	ANAPC2	0.2099	0.676251	0.054	0.581217
144233	BCDIN3D	-0.2034	-0.730613	0.054	0.581217
51279	C1RL	0.2083	0.672835	0.054	0.581217
55848	C9orf46	-0.2074	-0.739027	0.054	0.581217
386593	CHKB-CPT1B	0.2068	0.669607	0.054	0.581217
9337	CNOT8	-0.216	-0.75636	0.054	0.581217
2920	CXCL2	-0.1981	-0.719114	0.054	0.581217
1759	DNM1	0.189	0.629331	0.054	0.581217
2694	GIF	-0.2187	-0.761594	0.054	0.581217
100132707	LOC100132707	0.2133	0.683413	0.054	0.581217
124801	LSM12	-0.2194	-0.762935	0.054	0.581217
4683	NBN	-0.2084	-0.741095	0.054	0.581217
5892	RAD51L3	0.2045	0.664607	0.054	0.581217
8786	RGS11	0.2052	0.666135	0.054	0.581217
9252	RPS6KA5	-0.1966	-0.715785	0.054	0.581217
6339	SCNN1D	0.2068	0.669607	0.054	0.581217
6725	SRMS	0.2122	0.68111	0.054	0.581217
9507	ADAMTS4	0.2019	0.658883	0.055	0.584317
200539	ANKRD23	0.2169	0.690856	0.055	0.584317
389336	C5orf46	0.2236	0.704327	0.055	0.584317
58478	ENOPH1	-0.2027	-0.729117	0.055	0.584317
79807	GSTCD	-0.2025	-0.728689	0.055	0.584317
22824	HSPA4L	-0.2117	-0.747821	0.055	0.584317
100271722	LOC100271722	0.2085	0.673264	0.055	0.584317
4326	MMP17	0.1991	0.652632	0.055	0.584317
65008	MRPL1	-0.2027	-0.729117	0.055	0.584317
28957	MRPS28	-0.2094	-0.743149	0.055	0.584317
4826	NNAT	0.1955	0.644462	0.055	0.584317
133015	PACRGL	-0.2039	-0.731677	0.055	0.584317
5336	PLCG2	0.1941	0.641245	0.055	0.584317
79156	PLEKHF1	0.2037	0.662854	0.055	0.584317
5910	RAP1GDS1	-0.2005	-0.724371	0.055	0.584317
257364	SNX33	0.2046	0.664826	0.055	0.584317
6613	SUMO2	-0.2078	-0.739855	0.055	0.584317
25823	TPSG1	-0.2015	-0.726537	0.055	0.584317
55815	TSNAXIP1	0.2058	0.667441	0.055	0.584317
55769	ZNF83	0.1859	0.621942	0.055	0.584317
130872	AHSA2	0.20372	0.662898	0.056	0.586963
6046	BRD2	0.20525	0.666244	0.056	0.586963
83638	C11orf68	0.2018	0.658661	0.056	0.586963
79034	C7orf26	0.2095	0.6754	0.056	0.586963
126661	CCDC163P	-0.2049	-0.733795	0.056	0.586963
152302	CIDECP	0.2004	0.655546	0.056	0.586963
51143	DYNC1LI1	-0.207	-0.738195	0.056	0.586963
2235	FECH	-0.2009	-0.725239	0.056	0.586963
2557	GABRA4	-0.21448	-0.753371	0.056	0.586963
8294	HIST1H4I	0.208	0.672192	0.056	0.586963
3613	IMPA2	-0.2124	-0.749228	0.056	0.586963
3796	KIF2A	-0.2083	-0.740889	0.056	0.586963
27430	MAT2B	-0.2173	-0.758893	0.056	0.586963
5007	OSBP	-0.2031	-0.729973	0.056	0.586963
5585	PKN1	0.19201	0.636399	0.056	0.586963
57479	PRR12	0.2074	0.670902	0.056	0.586963
10076	PTPRU	0.1925	0.63754	0.056	0.586963
64221	ROBO3	0.2162	0.68942	0.056	0.586963
9153	SLC28A2	-0.2065	-0.737153	0.056	0.586963
402682	UFSP1	0.1939	0.640783	0.056	0.586963
147645	VSIG10L	0.1975	0.649019	0.056	0.586963
32	ACACB	0.2026	0.660432	0.057	0.589116
9311	ACCN3	0.216	0.689009	0.057	0.589116
134265	AFAP1L1	0.2064	0.668742	0.057	0.589116
28984	C13orf15	0.2089	0.67412	0.057	0.589116
57604	C8orf79	-0.20589	-0.735877	0.057	0.589116
23152	CIC	0.209	0.674333	0.057	0.589116
51164	DCTN4	-0.1969	-0.716454	0.057	0.589116
54932	EXD3	0.213	0.682787	0.057	0.589116
134145	FAM173B	-0.1968	-0.716231	0.057	0.589116
64841	GNPNAT1	-0.2037	-0.731252	0.057	0.589116
54914	KIAA1797	-0.2027	-0.729117	0.057	0.589116
8861	LDB1	0.2068	0.669607	0.057	0.589116
81543	LRRC3	0.1928	0.638237	0.057	0.589116
2847	MCHR1	0.2054	0.666571	0.057	0.589116
54039	PCBP3	0.1857	0.621461	0.057	0.589116
57717	PCDHB16	0.196	0.645606	0.057	0.589116
8396	PIP4K2B	0.19778	0.649654	0.057	0.589116
10197	PSME3	-0.2102	-0.744782	0.057	0.589116
130132	RFTN2	0.211	0.678582	0.057	0.589116
84973	SNHG7	0.2028	0.660873	0.057	0.589116
10440	TIMM17A	-0.2017	-0.726969	0.057	0.589116
104	ADARB1	0.194	0.641014	0.058	0.589116
388815	C21orf34	0.22	0.69715	0.058	0.589116
26122	EPC2	0.2057	0.667223	0.058	0.589116
729830	FAM160A1	-0.2144	-0.753212	0.058	0.589116
11251	GPR44	-0.2151	-0.754594	0.058	0.589116
57476	GRAMD1B	0.201	0.656884	0.058	0.589116
3357	HTR2B	0.2022	0.659548	0.058	0.589116
55699	IARS2	-0.1988	-0.720656	0.058	0.589116
145501	ISM2	0.2071	0.670255	0.058	0.589116
3767	KCNJ11	0.2082	0.672621	0.058	0.589116
284252	KCTD1	0.1983	0.650829	0.058	0.589116
158358	KIAA2026	0.21	0.676463	0.058	0.589116
100287227	LOC100287227	0.2063	0.668525	0.058	0.589116
135112	NCOA7	-0.1904	-0.701678	0.058	0.589116
197135	PATL2	0.2074	0.670902	0.058	0.589116
56131	PCDHB4	0.194	0.641014	0.058	0.589116
148713	PTPRVP	0.2086	0.673478	0.058	0.589116
10169	SERF2	0.199	0.652407	0.058	0.589116
6734	SRPR	0.2065	0.668958	0.058	0.589116
29888	STRN4	0.1981	0.650378	0.058	0.589116
6902	TBCA	-0.2014	-0.726321	0.058	0.589116
9804	TOMM20	-0.2017	-0.726969	0.058	0.589116
81603	TRIM8	0.1968	0.64743	0.058	0.589116
9341	VAMP3	-0.1927	-0.706978	0.058	0.589116
220001	VWCE	0.2089	0.67412	0.058	0.589116
117166	WFIKKN1	0.2129	0.682577	0.058	0.589116
6375	XCL1	0.21	0.676463	0.058	0.589116
10444	ZER1	0.2055	0.666789	0.058	0.589116
51042	ZNF593	-0.2045	-0.732949	0.058	0.589116
55324	ABCF3	0.2055	0.666789	0.059	0.593762
59	ACTA2	0.189	0.629331	0.059	0.593762
84938	ATG4C	-0.2037	-0.731252	0.059	0.593762
126695	C1orf172	-0.1935	-0.708803	0.059	0.593762
1840	DTX1	0.2092	0.67476	0.059	0.593762
23462	HEY1	0.1916	0.635443	0.059	0.593762
653319	KIAA0895L	0.21	0.676463	0.059	0.593762
550112	LOC550112	0.2054	0.666571	0.059	0.593762
127018	LYPLAL1	-0.2099	-0.744171	0.059	0.593762
8774	NAPG	-0.2033	-0.7304	0.059	0.593762
132160	PPM1M	0.1997	0.653979	0.059	0.593762
4007	PRICKLE3	0.198	0.650152	0.059	0.593762
51100	SH3GLB1	-0.1971	-0.716898	0.059	0.593762
123036	TC2N	-0.1971	-0.716898	0.059	0.593762
63925	ZNF335	0.202	0.659105	0.059	0.593762
79575	ABHD8	0.1983	0.650829	0.06	0.596511
57472	CNOT6	-0.2025	-0.728689	0.06	0.596511
2023	ENO1	-0.1971	-0.716898	0.06	0.596511
56181	FAM54B	-0.1913	-0.703761	0.06	0.596511
51659	GINS2	-0.207	-0.738195	0.06	0.596511
338328	GPIHBP1	0.2028	0.660873	0.06	0.596511
653238	GTF2H2B	-0.2052	-0.734427	0.06	0.596511
10042	HMGXB4	-0.2051	-0.734216	0.06	0.596511
169355	IDO2	-0.2309	-0.784045	0.06	0.596511
284440	LOC284440	0.1884	0.62791	0.06	0.596511
65996	MGC2752	-0.2015	-0.726537	0.06	0.596511
64091	POPDC2	0.1958	0.645149	0.06	0.596511
441212	RP9P	0.19904	0.652497	0.06	0.596511
55972	SLC25A40	-0.2112	-0.746811	0.06	0.596511
6878	TAF6	0.1948	0.642856	0.06	0.596511
10189	THOC4	-0.2074	-0.739027	0.06	0.596511
641649	TMEM91	0.2078	0.671762	0.06	0.596511
90249	UNC5A	0.2014	0.657773	0.06	0.596511
10493	VAT1	0.1804	0.608554	0.06	0.596511
168544	ZNF467	0.2043	0.66417	0.06	0.596511
378708	APITD1	-0.1984	-0.719775	0.061	0.597407
387103	CENPW	-0.2008	-0.725022	0.061	0.597407
285605	DTWD2	-0.1992	-0.721534	0.061	0.597407
8891	EIF2B3	-0.2045	-0.732949	0.061	0.597407
2074	ERCC6	0.207	0.670039	0.061	0.597407
57579	FAM135A	-0.2057	-0.735478	0.061	0.597407
3021	H3F3B	-0.1998	-0.722846	0.061	0.597407
10657	KHDRBS1	-0.1932	-0.708119	0.061	0.597407
65095	KRI1	0.19911	0.652654	0.061	0.597407
3931	LCAT	0.197	0.647885	0.061	0.597407
10186	LHFP	0.2023	0.659769	0.061	0.597407
100130093	LOC100130093	0.208	0.672192	0.061	0.597407
158056	MAMDC4	0.2158	0.688597	0.061	0.597407
9175	MAP3K13	0.2088	0.673906	0.061	0.597407
10	NAT2	-0.1962	-0.714892	0.061	0.597407
5281	PIGF	-0.2066	-0.737362	0.061	0.597407
23236	PLCB1	0.2072	0.670471	0.061	0.597407
5784	PTPN14	0.2102	0.676888	0.061	0.597407
9609	RAB36	-0.20345	-0.73072	0.061	0.597407
349667	RTN4RL2	0.1999	0.654427	0.061	0.597407
6423	SFRP2	0.2047	0.665045	0.061	0.597407
55061	SUSD4	0.203	0.661314	0.061	0.597407
7048	TGFBR2	0.2095	0.6754	0.061	0.597407
27010	TPK1	-0.1902	-0.701214	0.061	0.597407
7716	VEZF1	-0.2028	-0.729331	0.061	0.597407
9049	AIP	0.196	0.645606	0.062	0.60004
153642	ARSK	-0.2007	-0.724805	0.062	0.60004
192134	B3GNT6	-0.2039	-0.731677	0.062	0.60004
219771	CCNY	0.198	0.650152	0.062	0.60004
1264	CNN1	0.1867	0.62386	0.062	0.60004
55224	ETNK2	0.2059	0.667658	0.062	0.60004
2170	FABP3	0.1867	0.62386	0.062	0.60004
3992	FADS1	0.201	0.656884	0.062	0.60004
54537	FAM35A	-0.2018	-0.727184	0.062	0.60004
117283	IP6K3	-0.20417	-0.73225	0.062	0.60004
23162	MAPK8IP3	0.2014	0.657773	0.062	0.60004
92014	MCART1	-0.2141	-0.752618	0.062	0.60004
11044	PAPD7	0.2117	0.680059	0.062	0.60004
27351	PPPDE2	-0.1988	-0.720656	0.062	0.60004
353116	RILPL1	0.1962	0.646063	0.062	0.60004
9353	SLIT2	0.1941	0.641245	0.062	0.60004
6950	TCP1	-0.2072	-0.738611	0.062	0.60004
203068	TUBB	-0.20261	-0.728925	0.062	0.60004
7416	VDAC1	-0.1927	-0.706978	0.062	0.60004
55205	ZNF532	0.1908	0.633571	0.062	0.60004
632	BGLAP	0.2083	0.672835	0.063	0.600164
199800	C19orf76	0.2103	0.6771	0.063	0.600164
140710	C20orf117	0.1953	0.644004	0.063	0.600164
1195	CLK1	0.20587	0.667593	0.063	0.600164
83401	ELOVL3	0.197	0.647885	0.063	0.600164
2801	GOLGA2	0.2044	0.664389	0.063	0.600164
23072	HECW1	0.2057	0.667223	0.063	0.600164
22997	IGSF9B	0.1911	0.634274	0.063	0.600164
43847	KLK14	0.207	0.670039	0.063	0.600164
79412	KREMEN2	0.2047	0.665045	0.063	0.600164
401052	LOC401052	0.1994	0.653306	0.063	0.600164
91694	LONRF1	-0.1977	-0.718229	0.063	0.600164
4294	MAP3K10	0.2003	0.655322	0.063	0.600164
148932	MOBKL2C	0.2008	0.656438	0.063	0.600164
79922	MRM1	0.2064	0.668742	0.063	0.600164
54948	MRPL16	-0.2014	-0.726321	0.063	0.600164
50507	NOX4	0.2043	0.66417	0.063	0.600164
8612	PPAP2C	-0.2026	-0.728903	0.063	0.600164
83886	PRSS27	0.1984	0.651055	0.063	0.600164
5867	RAB4A	-0.1963	-0.715116	0.063	0.600164
387	RHOA	-0.2065	-0.737153	0.063	0.600164
51136	RNFT1	-0.2041	-0.732102	0.063	0.600164
6343	SCT	0.2142	0.685288	0.063	0.600164
283130	SLC25A45	0.201	0.656884	0.063	0.600164
6829	SUPT5H	0.2017	0.65844	0.063	0.600164
83719	YPEL3	0.1977	0.649473	0.063	0.600164
65249	ZSWIM4	0.2082	0.672621	0.063	0.600164
51166	AADAT	-0.1906	-0.702142	0.064	0.601314
64137	ABCG4	0.2046	0.664826	0.064	0.601314
70	ACTC1	0.1907	0.633336	0.064	0.601314
23092	ARHGAP26	-0.1968	-0.716231	0.064	0.601314
398	ARHGDIG	0.192	0.636376	0.064	0.601314
8313	AXIN2	-0.2048	-0.733584	0.064	0.601314
285382	C3orf70	-0.1874	-0.694647	0.064	0.601314
3491	CYR61	0.1945	0.642166	0.064	0.601314
64421	DCLRE1C	0.2012	0.657329	0.064	0.601314
2167	FABP4	0.1985	0.651281	0.064	0.601314
139285	FAM123B	0.192	0.636376	0.064	0.601314
3036	HAS1	0.2018	0.658661	0.064	0.601314
3067	HDC	-0.2007	-0.724805	0.064	0.601314
3305	HSPA1L	0.1976	0.649246	0.064	0.601314
200942	KLHDC8B	0.204	0.663513	0.064	0.601314
286967	NCRNA00204B	0.2008	0.656438	0.064	0.601314
9061	PAPSS1	-0.2	-0.723283	0.064	0.601314
4860	PNP	-0.199	-0.721095	0.064	0.601314
91433	RCCD1	0.21221	0.681131	0.064	0.601314
6299	SALL1	-0.1971	-0.716898	0.064	0.601314
50651	SLC45A1	0.1916	0.635443	0.064	0.601314
85013	TMEM128	-0.2025	-0.728689	0.064	0.601314
26019	UPF2	0.2091	0.674547	0.064	0.601314
7424	VEGFC	0.1948	0.642856	0.064	0.601314
145741	C2CD4A	-0.1807	-0.678455	0.065	0.602516
51759	C9orf78	0.2072	0.670471	0.065	0.602516
1044	CDX1	-0.1906	-0.702142	0.065	0.602516
25839	COG4	0.2065	0.668958	0.065	0.602516
3627	CXCL10	-0.199009	-0.721115	0.065	0.602516
1788	DNMT3A	0.2114	0.679427	0.065	0.602516
51513	ETV7	-0.2089	-0.742124	0.065	0.602516
113828	FAM83F	-0.1917	-0.704683	0.065	0.602516
3386	ICAM4	0.191	0.634039	0.065	0.602516
285074	LOC285074	0.1983	0.650829	0.065	0.602516
6182	MRPL12	-0.2063	-0.736735	0.065	0.602516
9801	MRPL19	-0.1988	-0.720656	0.065	0.602516
56125	PCDHB11	0.1927	0.638005	0.065	0.602516
5165	PDK3	-0.2012	-0.725889	0.065	0.602516
57333	RCN3	0.1988	0.651957	0.065	0.602516
6185	RPN2	-0.1887	-0.697711	0.065	0.602516
6875	TAF4B	0.1923	0.637075	0.065	0.602516
83756	TAS1R3	0.201	0.656884	0.065	0.602516
116985	ARAP1	0.2022	0.659548	0.066	0.602516
57194	ATP10A	0.1943	0.641706	0.066	0.602516
729096	BMS1P4	0.2012	0.657329	0.066	0.602516
219833	C11orf45	0.1915	0.635209	0.066	0.602516
84284	C1orf57	-0.2072	-0.738611	0.066	0.602516
10753	CAPN9	-0.2075	-0.739234	0.066	0.602516
55349	CHDH	-0.1887	-0.697711	0.066	0.602516
80034	CSRNP3	0.2107	0.677948	0.066	0.602516
145483	FAM161B	0.2074	0.670902	0.066	0.602516
3033	HADH	-0.1854	-0.689885	0.066	0.602516
23463	ICMT	-0.1875	-0.694884	0.066	0.602516
57158	JPH2	0.1859	0.621942	0.066	0.602516
28999	KLF15	0.1889	0.629095	0.066	0.602516
100128822	LOC100128822	0.2071	0.670255	0.066	0.602516
729234	LOC729234	0.1998	0.654203	0.066	0.602516
10446	LRRN2	0.1981	0.650378	0.066	0.602516
11253	MAN1B1	0.2019	0.658883	0.066	0.602516
8550	MAPKAPK5	-0.1972	-0.717121	0.066	0.602516
64978	MRPL38	-0.2035	-0.730826	0.066	0.602516
4548	MTR	0.1908	0.633571	0.066	0.602516
51168	MYO15A	0.2021	0.659326	0.066	0.602516
152559	PAQR3	-0.1952	-0.712649	0.066	0.602516
51294	PCDH12	0.1949	0.643086	0.066	0.602516
5110	PCMT1	-0.201	-0.725456	0.066	0.602516
9678	PHF14	0.1998	0.654203	0.066	0.602516
5290	PIK3CA	0.2	0.654651	0.066	0.602516
54498	SMOX	0.202	0.659105	0.066	0.602516
23166	STAB1	0.1941	0.641245	0.066	0.602516
54968	TMEM70	-0.2049	-0.733795	0.066	0.602516
7349	UCN	0.2109	0.678371	0.066	0.602516
7704	ZBTB16	0.1979	0.649925	0.066	0.602516
9203	ZMYM3	0.18878	0.628811	0.066	0.602516
643641	ZNF862	0.1978	0.649699	0.066	0.602516
10768	AHCYL1	-0.18656	-0.692655	0.067	0.606585
29798	C2orf27A	0.2072	0.670471	0.067	0.606585
124583	CANT1	-0.1927	-0.706978	0.067	0.606585
9034	CCRL2	-0.18602	-0.691368	0.067	0.606585
8534	CHST1	0.1959	0.645377	0.067	0.606585
494513	DFNB59	0.1942	0.641475	0.067	0.606585
85465	EPT1	-0.2026	-0.728903	0.067	0.606585
90952	ESAM	0.1866	0.62362	0.067	0.606585
9896	FIG4	-0.197	-0.716676	0.067	0.606585
653604	HIST2H3D	0.206	0.667875	0.067	0.606585
3678	ITGA5	0.1825	0.613708	0.067	0.606585
4337	MOCS1	0.188	0.62696	0.067	0.606585
6745	SSR1	-0.1822	-0.68214	0.067	0.606585
7581	ZNF33A	0.1969	0.647657	0.067	0.606585
54764	ZRANB1	0.1935	0.639859	0.067	0.606585
79169	C1orf35	0.1967	0.647202	0.068	0.608552
10363	HMG20A	0.1989	0.652182	0.068	0.608552
116379	IL22RA2	-0.2212	-0.766353	0.068	0.608552
100130581	LOC100130581	0.1905	0.632867	0.068	0.608552
4314	MMP3	-0.1874	-0.694647	0.068	0.608552
4330	MN1	0.1946	0.642397	0.068	0.608552
4716	NDUFB10	-0.2007	-0.724805	0.068	0.608552
5026	P2RX5	0.1983	0.650829	0.068	0.608552
149420	PDIK1L	-0.1884	-0.697006	0.068	0.608552
84816	RTN4IP1	-0.1959	-0.714221	0.068	0.608552
6342	SCP2	-0.193	-0.707663	0.068	0.608552
84947	SERAC1	-0.1913	-0.703761	0.068	0.608552
6717	SRI	-0.1997	-0.722628	0.068	0.608552
10460	TACC3	-0.1972	-0.717121	0.068	0.608552
90121	TSR2	0.1936	0.64009	0.068	0.608552
7265	TTC1	-0.1995	-0.722191	0.068	0.608552
85378	TUBGCP6	0.2037	0.662854	0.068	0.608552
165324	UBXN2A	-0.1968	-0.716231	0.068	0.608552
7347	UCHL3	-0.2035	-0.730826	0.068	0.608552
653635	WASH7P	0.1977	0.649473	0.068	0.608552
7559	ZNF12	0.1912	0.634508	0.068	0.608552
140766	ADAMTS14	0.1897	0.630985	0.069	0.608552
55326	AGPAT5	-0.1972	-0.717121	0.069	0.608552
92714	ARRDC1	0.1834	0.615901	0.069	0.608552
85319	BAGE2	0.2044	0.664389	0.069	0.608552
283149	BCL9L	0.1882	0.627435	0.069	0.608552
55909	BIN3	-0.20337	-0.730549	0.069	0.608552
339942	C3orf47	0.2106	0.677736	0.069	0.608552
79616	CCNJL	-0.1881	-0.6963	0.069	0.608552
1179	CLCA1	-0.1897	-0.70005	0.069	0.608552
1284	COL4A2	0.1954	0.644233	0.069	0.608552
55760	DHX32	-0.2	-0.723283	0.069	0.608552
80820	EEPD1	0.19279	0.638214	0.069	0.608552
2036	EPB41L1	0.201	0.656884	0.069	0.608552
253152	EPHX4	-0.19302	-0.707709	0.069	0.608552
64110	MAGEF1	0.1981	0.650378	0.069	0.608552
619373	MBOAT4	0.21055	0.67763	0.069	0.608552
2206	MS4A2	-0.1989	-0.720875	0.069	0.608552
9612	NCOR2	0.1929	0.638469	0.069	0.608552
54660	PCDHB18	0.1962	0.646063	0.069	0.608552
440456	PLEKHM1P	0.2047	0.665045	0.069	0.608552
57716	PRX	0.1976	0.649246	0.069	0.608552
6523	SLC5A1	-0.1903	-0.701446	0.069	0.608552
7494	XBP1	-0.1857	-0.690603	0.069	0.608552
197320	ZNF778	0.197	0.647885	0.069	0.608552
20	ABCA2	0.2013	0.657551	0.07	0.608552
119016	AGAP4	0.2017	0.65844	0.07	0.608552
79444	BIRC7	0.192	0.636376	0.07	0.608552
55010	C12orf48	-0.1947	-0.711522	0.07	0.608552
784	CACNB3	0.2	0.654651	0.07	0.608552
22897	CEP164	0.20182	0.658706	0.07	0.608552
119467	CLRN3	-0.1915	-0.704223	0.07	0.608552
79659	DYNC2H1	0.1938	0.640552	0.07	0.608552
24139	EML2	0.1971	0.648112	0.07	0.608552
10013	HDAC6	0.1988	0.651957	0.07	0.608552
3665	IRF7	0.1989	0.652182	0.07	0.608552
23416	KCNH3	0.1929	0.638469	0.07	0.608552
23383	KIAA0892	0.1971	0.648112	0.07	0.608552
349114	LOC349114	0.195475	0.644405	0.07	0.608552
91977	MYOZ3	0.2044	0.664389	0.07	0.608552
5159	PDGFRB	0.1931	0.638933	0.07	0.608552
5720	PSME1	-0.1974	-0.717565	0.07	0.608552
8045	RASSF7	0.19876	0.651867	0.07	0.608552
7355	SLC35A2	0.196	0.645606	0.07	0.608552
140290	TCP10L	0.2015	0.657996	0.07	0.608552
8794	TNFRSF10C	-0.1986	-0.720216	0.07	0.608552
7172	TPMT	-0.1902	-0.701214	0.07	0.608552
6434	TRA2B	-0.1884	-0.697006	0.07	0.608552
27089	UQCRQ	-0.197	-0.716676	0.07	0.608552
114990	VASN	0.1898	0.63122	0.07	0.608552
7450	VWF	0.192	0.636376	0.07	0.608552
7490	WT1	0.182	0.612486	0.07	0.608552
644353	ZCCHC18	0.2026	0.660432	0.07	0.608552
118738	ZNF488	0.191	0.634039	0.07	0.608552
201514	ZNF584	-0.19468	-0.711477	0.07	0.608552
11214	AKAP13	0.1946	0.642397	0.071	0.608552
230	ALDOC	0.1905	0.632867	0.071	0.608552
27106	ARRDC2	0.192537	0.637626	0.071	0.608552
472	ATM	0.2005	0.655769	0.071	0.608552
54880	BCOR	0.199	0.652407	0.071	0.608552
9244	CRLF1	0.1876	0.626008	0.071	0.608552
1589	CYP21A2	0.1927	0.638005	0.071	0.608552
255520	ELMOD2	-0.2004	-0.724154	0.071	0.608552
132884	EVC2	0.1938	0.640552	0.071	0.608552
10146	G3BP1	-0.1968	-0.716231	0.071	0.608552
160622	GRASP	0.1831	0.615171	0.071	0.608552
3787	KCNS1	0.1982	0.650604	0.071	0.608552
3930	LBR	-0.1915	-0.704223	0.071	0.608552
4285	MIPEP	-0.2065	-0.737153	0.071	0.608552
10412	NSA2	-0.1917	-0.704683	0.071	0.608552
84875	PARP10	0.2007	0.656215	0.071	0.608552
25886	POC1A	-0.1874	-0.694647	0.071	0.608552
5698	PSMB9	-0.1884	-0.697006	0.071	0.608552
26056	RAB11FIP5	0.1857	0.621461	0.071	0.608552
6286	S100P	-0.1935	-0.708803	0.071	0.608552
26278	SACS	0.1889	0.629095	0.071	0.608552
56996	SLC12A9	0.19644	0.64661	0.071	0.608552
51669	TMEM66	-0.1907	-0.702374	0.071	0.608552
8717	TRADD	0.1978	0.649699	0.071	0.608552
54853	WDR55	-0.1932	-0.708119	0.071	0.608552
677	ZFP36L1	0.2039	0.663293	0.071	0.608552
10017	BCL2L10	0.196	0.645606	0.072	0.608552
90120	C9orf69	0.1881	0.627198	0.072	0.608552
80381	CD276	0.1845	0.618568	0.072	0.608552
79958	DENND1C	0.1924	0.637307	0.072	0.608552
9695	EDEM1	-0.195	-0.712199	0.072	0.608552
2071	ERCC3	0.1914	0.634975	0.072	0.608552
339768	ESPNL	0.2021	0.659326	0.072	0.608552
2335	FN1	0.1957	0.64492	0.072	0.608552
115330	GPR146	0.1962	0.646063	0.072	0.608552
3635	INPP5D	0.1834	0.615901	0.072	0.608552
3792	KEL	0.1964	0.646519	0.072	0.608552
3908	LAMA2	0.191	0.634039	0.072	0.608552
100009676	LOC100009676	0.1956	0.644691	0.072	0.608552
100130742	LRRC69	0.1996	0.653755	0.072	0.608552
55904	MLL5	0.1979	0.649925	0.072	0.608552
30849	PIK3R4	0.1985	0.651281	0.072	0.608552
147699	PPM1N	0.2071	0.670255	0.072	0.608552
10213	PSMD14	-0.2006	-0.724588	0.072	0.608552
57109	REXO4	0.1896	0.630749	0.072	0.608552
220134	SKA1	-0.1893	-0.699116	0.072	0.608552
4091	SMAD6	0.1947	0.642627	0.072	0.608552
6604	SMARCD3	0.1947	0.642627	0.072	0.608552
6666	SOX12	0.1867	0.62386	0.072	0.608552
7158	TP53BP1	0.1797	0.606825	0.072	0.608552
219699	UNC5B	0.1957	0.64492	0.072	0.608552
100134938	UPK3BL	0.2013	0.657551	0.072	0.608552
10838	ZNF275	0.1914	0.634975	0.072	0.608552
84838	ZNF496	0.183	0.614927	0.072	0.608552
83607	AMMECR1L	0.1988	0.651957	0.073	0.609782
322	APBB1	0.183	0.614927	0.073	0.609782
149428	BNIPL	0.2019	0.658883	0.073	0.609782
283450	C12orf51	0.2014	0.657773	0.073	0.609782
55181	C17orf71	-0.2017	-0.726969	0.073	0.609782
54863	C9orf167	0.1997	0.653979	0.073	0.609782
91782	CHMP7	-0.19375	-0.709371	0.073	0.609782
10938	EHD1	0.1896	0.630749	0.073	0.609782
83541	FAM110A	0.1931	0.638933	0.073	0.609782
26259	FBXW8	0.1883	0.627673	0.073	0.609782
2673	GFPT1	-0.1819	-0.681405	0.073	0.609782
387036	GUSBL1	0.2042	0.663951	0.073	0.609782
374443	LOC374443	0.1991	0.652632	0.073	0.609782
401431	LOC401431	0.1831	0.615171	0.073	0.609782
5600	MAPK11	0.1873	0.625293	0.073	0.609782
134492	NUDCD2	-0.197	-0.716676	0.073	0.609782
9400	RECQL5	0.1869	0.624338	0.073	0.609782
56920	SEMA3G	0.1909	0.633805	0.073	0.609782
54662	TBC1D13	0.1954	0.644233	0.073	0.609782
6919	TCEA2	0.189	0.629331	0.073	0.609782
8463	TEAD2	0.1814	0.611015	0.073	0.609782
7041	TGFB1I1	0.1789	0.604842	0.073	0.609782
57178	ZMIZ1	0.1965	0.646747	0.073	0.609782
113	ADCY7	0.1845	0.618568	0.074	0.613143
79025	C20orf195	0.195	0.643316	0.074	0.613143
727	C5	0.19222	0.636888	0.074	0.613143
51727	CMPK1	-0.1862	-0.691797	0.074	0.613143
23181	DIP2A	0.199	0.652407	0.074	0.613143
9721	GPRIN2	0.1863	0.622902	0.074	0.613143
84542	KIAA1841	-0.1902	-0.701214	0.074	0.613143
89796	NAV1	0.1921	0.636609	0.074	0.613143
5021	OXTR	0.17962	0.606627	0.074	0.613143
11315	PARK7	-0.1876	-0.69512	0.074	0.613143
89801	PPP1R3F	0.168	0.577066	0.074	0.613143
10728	PTGES3	-0.1893	-0.699116	0.074	0.613143
55005	RMND1	-0.1909	-0.702837	0.074	0.613143
3925	STMN1	-0.1889	-0.69818	0.074	0.613143
81844	TRIM56	0.1941	0.641245	0.074	0.613143
23503	ZFYVE26	0.1994	0.653306	0.074	0.613143
395	ARHGAP6	0.1856	0.621221	0.075	0.61491
130813	C2orf50	0.18225	0.613097	0.075	0.61491
286207	C9orf117	0.1944	0.641936	0.075	0.61491
55246	CCDC25	-0.1919	-0.705143	0.075	0.61491
9973	CCS	0.1949	0.643086	0.075	0.61491
1013	CDH15	0.192	0.636376	0.075	0.61491
23406	COTL1	0.1905	0.632867	0.075	0.61491
1663	DDX11	0.2055	0.666789	0.075	0.61491
6993	DYNLT1	-0.1959	-0.714221	0.075	0.61491
56929	FEM1C	-0.1869	-0.693463	0.075	0.61491
8443	GNPAT	-0.1898	-0.700283	0.075	0.61491
81606	LBH	0.1926	0.637772	0.075	0.61491
4602	MYB	-0.1898	-0.700283	0.075	0.61491
4629	MYH11	0.1782	0.6031	0.075	0.61491
10135	NAMPT	-0.1815	-0.680424	0.075	0.61491
22861	NLRP1	0.1783	0.603349	0.075	0.61491
5446	PON3	0.18997	0.631621	0.075	0.61491
5814	PURB	0.1904	0.632632	0.075	0.61491
[truncated: 14,415 more rows]

## Sheet: GBM
Entrez ID	Gene Name	Raw Cox Coefficient	Sigmoidal Normalized Cox Coefficient	Raw Cox P-Value	BH Adjusted P-Value	Model: coxph(Surv(times,died) ~ gene + sex + age
5798	PTPRN	0.5112	0.979629	4.4e-06	0.0740652
5799	PTPRN2	0.4249	0.956406	1.3e-05	0.109414
7547	ZIC3	-0.3736	-0.964705	6e-05	0.33666
57864	SLC46A2	0.4085	0.949685	0.0001	0.403992
10956	OS9	0.3901	0.940941	0.00012	0.403992
3241	HPCAL1	0.3486	0.91549	0.00016	0.411473
27075	TSPAN13	0.384	0.937729	0.00022	0.411473
4824	NKX3-1	0.4005	0.94605	0.00023	0.411473
55313	CPPED1	0.3451	0.912917	0.00024	0.411473
9369	NRXN3	0.3572	0.921507	0.00028	0.411473
345757	FAM174A	0.3754	0.932913	0.00033	0.411473
3257	HPS1	0.369	0.929097	0.00035	0.411473
11025	LILRB3	0.348	0.915054	0.00037	0.411473
55758	RCOR3	-0.329	-0.943584	0.00038	0.411473
1133	CHRM5	0.3542	0.919456	0.0004	0.411473
100130776	LOC100130776	0.3553	0.920214	0.00042	0.411473
6302	TSPAN31	0.3298	0.900768	0.00043	0.411473
116832	RPL39L	0.3795	0.935252	0.00044	0.411473
6533	SLC6A6	0.3494	0.916068	0.00054	0.456896
2020	EN2	0.3357	0.905632	0.00055	0.456896
10406	WFDC2	0.315	0.8875	0.00057	0.456896
256380	SCML4	0.3444	0.912394	0.0006	0.459082
255031	FLJ35390	0.3078	0.880457	0.00063	0.461078
653857	ACTR3C	0.317	0.889386	0.00068	0.473818
728358	DEFA1B	0.3331	0.903517	0.00074	0.473818
5378	PMS1	-0.3086	-0.930222	0.00074	0.473818
133957	CCDC127	0.3148	0.88731	0.00076	0.473818
50943	FOXP3	0.2994	0.87172	0.00086	0.496358
286	ANK1	0.3747	0.932505	0.00093	0.496358
554202	LOC554202	0.3534	0.918901	0.00095	0.496358
55224	ETNK2	0.3241	0.895843	0.00099	0.496358
79577	CDC73	-0.3136	-0.933755	0.001	0.496358
84222	TMEM191A	0.376	0.93326	0.001	0.496358
84277	DNAJC30	0.3399	0.908956	0.0011	0.496358
3695	ITGB7	0.3214	0.893431	0.0011	0.496358
4745	NELL1	0.3115	0.884126	0.0011	0.496358
388610	TRNP1	0.3564	0.920965	0.0011	0.496358
4606	MYBPC2	0.3478	0.914908	0.0012	0.496358
5270	SERPINE2	0.3085	0.88116	0.0012	0.496358
7421	VDR	0.3154	0.887879	0.0012	0.496358
56172	ANKH	0.3058	0.878429	0.0013	0.496358
169044	COL22A1	0.2934	0.865118	0.0013	0.496358
5859	QARS	-0.3214	-0.938924	0.0013	0.496358
84916	CIRH1A	-0.32076	-0.938515	0.0015	0.496358
27122	DKK3	0.3068	0.879447	0.0015	0.496358
23148	NACAD	0.3038	0.876368	0.0015	0.496358
79605	PGBD5	0.2984	0.870641	0.0015	0.496358
51435	SCARA3	0.3014	0.873852	0.0015	0.496358
51496	CTDSPL2	-0.3457	-0.952642	0.0016	0.496358
148266	ZNF569	-0.3177	-0.936523	0.0016	0.496358
64090	GAL3ST2	0.2941	0.865904	0.0017	0.496358
5829	PXN	0.3213	0.89334	0.0017	0.496358
387032	ZKSCAN4	-0.28563	-0.911525	0.0017	0.496358
9668	ZNF432	-0.2752	-0.901536	0.0017	0.496358
83605	CCM2	0.2968	0.868897	0.0018	0.496358
4064	CD180	0.3145	0.887024	0.0018	0.496358
2706	GJB2	0.3145	0.887024	0.0018	0.496358
2262	GPC5	0.3326	0.903105	0.0018	0.496358
57142	RTN4	0.2774	0.845945	0.0018	0.496358
1523	CUX1	0.3082	0.880859	0.0019	0.496358
9358	ITGBL1	0.2902	0.861469	0.0019	0.496358
148789	B3GALNT2	-0.2738	-0.900117	0.002	0.496358
2700	GJA3	-0.3027	-0.925818	0.002	0.496358
4353	MPO	0.3451	0.912917	0.002	0.496358
10404	PGCP	0.316	0.888447	0.002	0.496358
23096	IQSEC2	0.291	0.86239	0.0021	0.496358
9180	OSMR	0.3026	0.875116	0.0021	0.496358
23007	PLCH1	0.2952	0.867131	0.0021	0.496358
9921	RNF10	0.3079	0.880558	0.0021	0.496358
54811	ZNF562	-0.2784	-0.90471	0.0021	0.496358
90576	ZNF799	-0.3023	-0.92551	0.0021	0.496358
975	CD81	0.2845	0.854744	0.0022	0.496358
85411	C6orf114	0.3011	0.873535	0.0023	0.496358
79961	DENND2D	0.298	0.870207	0.0023	0.496358
55138	FAM90A1	0.2894	0.860543	0.0023	0.496358
100134229	LOC100134229	0.3104	0.883047	0.0023	0.496358
5029	P2RY2	0.303	0.875535	0.0023	0.496358
8572	PDLIM4	0.3059	0.878531	0.0023	0.496358
92558	CCDC64	0.2951	0.86702	0.0025	0.500817
1508	CTSB	0.2884	0.859377	0.0026	0.500817
11166	SOX21	-0.2892	-0.914717	0.0026	0.500817
83787	ARMC10	0.3017	0.874169	0.0027	0.500817
57211	GPR126	-0.2831	-0.909195	0.0027	0.500817
65999	LRRC61	0.2743	0.841952	0.0027	0.500817
4046	LSP1	0.2903	0.861585	0.0027	0.500817
84246	MED10	0.303	0.875535	0.0027	0.500817
377	ARF3	0.2917	0.863191	0.0028	0.500817
10505	SEMA4F	0.30378	0.876347	0.0028	0.500817
55343	SLC35C1	0.2989	0.871181	0.0028	0.500817
50651	SLC45A1	0.2743	0.841952	0.0028	0.500817
261729	STEAP2	0.2904	0.8617	0.0028	0.500817
330	BIRC3	0.2864	0.857018	0.0029	0.500817
140947	C5orf20	0.2884	0.859377	0.0029	0.500817
136895	C7orf31	0.2685	0.834227	0.0029	0.500817
4008	LMO7	0.3132	0.885777	0.0029	0.500817
2139	EYA2	-0.2673	-0.893268	0.003	0.500817
9208	LRRFIP1	0.2946	0.866463	0.003	0.500817
55350	VNN3	0.326	0.89751	0.003	0.500817
245812	CNPY4	0.3059	0.878531	0.0031	0.500817
55695	NSUN5	0.27437	0.842044	0.0031	0.500817
5329	PLAUR	0.3068	0.879447	0.0031	0.500817
25813	SAMM50	-0.2859	-0.911771	0.0031	0.500817
3489	IGFBP6	0.3155	0.887974	0.0033	0.500817
387890	TMEM233	0.2841	0.85426	0.0033	0.500817
6936	C2orf3	-0.2863	-0.912133	0.0034	0.500817
129293	C2orf89	0.3238	0.895578	0.0034	0.500817
28988	DBNL	0.2927	0.864328	0.0034	0.500817
84514	GHDC	0.252	0.810341	0.0034	0.500817
4016	LOXL1	0.3183	0.890596	0.0034	0.500817
80317	ZKSCAN3	-0.2458	-0.867334	0.0034	0.500817
79020	C7orf25	0.2561	0.816549	0.0035	0.500817
7288	TULP2	0.2919	0.863419	0.0035	0.500817
165	AEBP1	0.261	0.823729	0.0036	0.500817
63917	GALNT11	0.2819	0.851577	0.0036	0.500817
3036	HAS1	0.3045	0.877093	0.0036	0.500817
10553	HTATIP2	0.2844	0.854623	0.0036	0.500817
3693	ITGB5	0.2685	0.834227	0.0036	0.500817
8228	PNPLA4	0.2823	0.852068	0.0036	0.500817
84679	SLC9A7	0.3042	0.876783	0.0036	0.500817
6781	STC1	0.3181	0.89041	0.0036	0.500817
81501	TM7SF4	0.2875	0.85832	0.0036	0.500817
783	CACNB2	0.279	0.84797	0.0037	0.503665
284391	ZNF844	-0.2814	-0.907596	0.0037	0.503665
1509	CTSD	0.2957	0.867685	0.0038	0.503665
220930	LOC220930	-0.3038	-0.926659	0.0038	0.503665
283050	LOC283050	0.3144	0.886928	0.0038	0.503665
3084	NRG1	0.303	0.875535	0.0038	0.503665
2058	EPRS	-0.2775	-0.903827	0.0039	0.50499
54537	FAM35A	-0.27556	-0.901898	0.0039	0.50499
27342	RABGEF1	0.2748	0.842603	0.0039	0.50499
81565	NDEL1	0.3001	0.87247	0.004	0.507296
4013	VWA5A	0.2645	0.828701	0.0041	0.507296
121601	ANO4	0.2926	0.864214	0.0042	0.507296
366	AQP9	0.2696	0.835718	0.0042	0.507296
6609	SMPD1	0.2898	0.861007	0.0042	0.507296
79369	B3GNT4	0.3005	0.872897	0.0043	0.507296
645431	LOC645431	0.2937	0.865455	0.0043	0.507296
9752	PCDHA9	0.2659	0.830654	0.0043	0.507296
30851	TAX1BP3	0.2719	0.838796	0.0043	0.507296
84503	ZNF527	-0.2801	-0.906356	0.0043	0.507296
10218	ANGPTL7	0.2956	0.867574	0.0044	0.507296
26580	BSCL2	0.2784	0.847213	0.0044	0.507296
54973	CPSF3L	-0.2669	-0.892832	0.0044	0.507296
64838	FNDC4	0.2835	0.853533	0.0044	0.507296
5794	PTPRH	0.2973	0.869444	0.0044	0.507296
7378	UPP1	0.278	0.846707	0.0044	0.507296
84295	PHF6	-0.2674	-0.893377	0.0045	0.515296
5918	RARRES1	0.2946	0.866463	0.0046	0.515511
64374	SIL1	0.267	0.832174	0.0046	0.515511
6696	SPP1	0.2724	0.839459	0.0046	0.515511
2984	GUCY2C	0.3059	0.878531	0.0047	0.515511
57708	MIER1	-0.25812	-0.882838	0.0047	0.515511
55740	ENAH	-0.28094	-0.907159	0.0048	0.515511
3669	ISG20	0.244	0.797684	0.0048	0.515511
55650	PIGV	0.2613	0.82416	0.0048	0.515511
7532	YWHAG	0.268	0.833545	0.0048	0.515511
6372	CXCL6	0.2649	0.829261	0.0049	0.515511
10447	FAM3C	0.2632	0.826869	0.0049	0.515511
730971	FLJ36777	0.2707	0.837197	0.0049	0.515511
57414	RHBDD2	0.2643	0.82842	0.0049	0.515511
147040	KCTD11	0.2759	0.844025	0.005	0.51635
10628	TXNIP	0.2633	0.827011	0.005	0.51635
84146	ZNF644	-0.2695	-0.895634	0.005	0.51635
4688	NCF2	0.2619	0.82502	0.0053	0.537439
148418	SAMD13	-0.2965	-0.920904	0.0053	0.537439
50853	VILL	0.268664	0.83445	0.0053	0.537439
80111	C3orf36	0.2855	0.855945	0.0054	0.544301
79718	TBL1XR1	-0.2793	-0.905585	0.0055	0.54782
51061	TXNDC11	0.2686	0.834363	0.0055	0.54782
200058	FLJ23867	0.2758	0.843896	0.0056	0.551426
1522	CTSZ	0.2743	0.841952	0.0057	0.551426
54206	ERRFI1	0.256	0.8164	0.0057	0.551426
3212	HOXB2	0.2525	0.811108	0.0057	0.551426
9021	SOCS3	0.277	0.845435	0.0057	0.551426
974	CD79B	0.2777	0.846327	0.0058	0.554831
25825	BACE2	0.283	0.852924	0.0059	0.554831
192668	CYS1	0.278	0.846707	0.0059	0.554831
23219	FBXO28	-0.2474	-0.86945	0.0059	0.554831
84912	SLC35B4	0.25559	0.815787	0.0059	0.554831
162239	ZFP1	-0.2776	-0.903926	0.006	0.5611
11332	ACOT7	0.2592	0.821122	0.0061	0.5611
55466	DNAJA4	0.297	0.869116	0.0061	0.5611
717	C2	0.2581	0.819511	0.0062	0.5611
2896	GRN	0.2732	0.840513	0.0062	0.5611
9123	SLC16A3	0.2834	0.853411	0.0062	0.5611
90589	ZNF625	-0.2333	-0.849673	0.0062	0.5611
1649	DDIT3	0.2618	0.824877	0.0064	0.562977
114879	OSBPL5	0.2722	0.839194	0.0064	0.562977
6929	TCF3	-0.2351	-0.852343	0.0064	0.562977
528	ATP6V1C1	0.253	0.811872	0.0065	0.562977
57863	CADM3	0.268	0.833545	0.0065	0.562977
163050	ZNF564	-0.2528	-0.876363	0.0065	0.562977
2001	ELF5	0.2691	0.835042	0.0067	0.562977
222234	FAM185A	0.2763	0.844539	0.0067	0.562977
653333	FAM86B2	0.2605	0.823008	0.0067	0.562977
83943	IMMP2L	0.2772	0.84569	0.0067	0.562977
5153	PDE1B	0.287	0.85773	0.0067	0.562977
6279	S100A8	0.2559	0.816251	0.0067	0.562977
9744	ACAP1	0.2616	0.82459	0.0068	0.562977
84803	AGPAT9	0.2698	0.835988	0.0068	0.562977
3363	HTR7	0.2713	0.837999	0.0068	0.562977
6715	SRD5A1	0.2765	0.844796	0.0069	0.562977
7425	VGF	0.2728	0.839987	0.0069	0.562977
283507	SUGT1L1	-0.272	-0.898263	0.007	0.562977
57711	ZNF529	-0.2528	-0.876363	0.007	0.562977
924	CD7	0.2673	0.832587	0.0071	0.562977
344967	LOC344967	0.2483	0.804578	0.0071	0.562977
56975	FAM20C	0.2752	0.843121	0.0073	0.562977
3215	HOXB5	0.2657	0.830376	0.0073	0.562977
3706	ITPKA	0.2829	0.852802	0.0073	0.562977
254042	MAP1D	-0.2503	-0.873206	0.0073	0.562977
23401	FRAT2	-0.2689	-0.894994	0.0074	0.562977
8809	IL18R1	0.2609	0.823585	0.0075	0.562977
2660	MSTN	-0.2663	-0.892176	0.0075	0.562977
9295	SFRS11	-0.2358	-0.85337	0.0075	0.562977
9425	CDYL	-0.2716	-0.897847	0.0076	0.562977
11226	GALNT6	0.2472	0.802834	0.0076	0.562977
51019	CCDC53	0.2628	0.826302	0.0077	0.562977
255101	CCDC108	0.2307	0.77498	0.0078	0.562977
23608	MKRN1	0.2598	0.821995	0.0078	0.562977
4999	ORC2L	-0.24966	-0.872386	0.0078	0.562977
81554	WBSCR16	0.2896	0.860775	0.0078	0.562977
50486	G0S2	0.2415	0.793577	0.0079	0.562977
5806	PTX3	0.2732	0.840513	0.0079	0.562977
10054	UBA2	-0.24772	-0.86987	0.0079	0.562977
2268	FGR	0.2415	0.793577	0.008	0.562977
6000	RGS7	0.2736	0.841038	0.008	0.562977
3984	LIMK1	0.2686	0.834363	0.0081	0.562977
10439	OLFM1	0.2715	0.838265	0.0081	0.562977
9536	PTGES	0.264	0.827998	0.0081	0.562977
272	AMPD3	0.2579	0.819217	0.0082	0.562977
79697	C14orf169	0.2505	0.808023	0.0082	0.562977
9925	ZBTB5	-0.2584	-0.88317	0.0082	0.562977
79973	ZNF442	-0.2438	-0.864644	0.0082	0.562977
1757	SARDH	0.272	0.838929	0.0083	0.562977
6666	SOX12	-0.2416	-0.861626	0.0083	0.562977
646658	TMEM90A	0.2587	0.820391	0.0083	0.562977
7106	TSPAN4	0.2717	0.838531	0.0083	0.562977
84871	AGBL4	0.251615	0.809748	0.0084	0.562977
657	BMPR1A	-0.2582	-0.882933	0.0084	0.562977
22924	MAPRE3	0.2678	0.833272	0.0084	0.562977
64005	MYO1G	0.2653	0.829819	0.0084	0.562977
57451	ODZ2	0.25846	0.82004	0.0084	0.562977
54472	TOLLIP	0.2677	0.833135	0.0084	0.562977
64856	VWA1	0.256	0.8164	0.0084	0.562977
2295	FOXF2	-0.2512	-0.874351	0.0085	0.562977
117245	HRASLS5	0.2404	0.791747	0.0085	0.562977
3897	L1CAM	0.249	0.80568	0.0085	0.562977
79883	PODNL1	0.2898	0.861007	0.0085	0.562977
79918	SETD6	-0.2396	-0.858829	0.0085	0.562977
29887	SNX10	0.2499	0.807089	0.0085	0.562977
8553	BHLHE40	0.28	0.849222	0.0086	0.562977
3219	HOXB9	0.293	0.864667	0.0086	0.562977
199964	TMEM61	0.2365	0.785142	0.0086	0.562977
387509	GPR153	0.2708	0.837331	0.0087	0.562977
2979	GUCA1B	-0.2642	-0.889848	0.0087	0.562977
7052	TGM2	0.2747	0.842473	0.0087	0.562977
1176	AP3S1	0.2717	0.838531	0.0088	0.562977
26112	CCDC69	0.2682	0.833818	0.0088	0.562977
84085	FBXO30	-0.253	-0.876612	0.0088	0.562977
30008	EFEMP2	0.288	0.858908	0.009	0.562977
23596	OPN3	0.245	0.799306	0.009	0.562977
597	BCL2A1	0.2572	0.818184	0.0091	0.562977
399668	NCRNA00086	0.258	0.819364	0.0091	0.562977
91662	NLRP12	0.2787	0.847592	0.0091	0.562977
140767	NRSN1	0.2643	0.82842	0.0091	0.562977
611	OPN1SW	0.262	0.825163	0.0091	0.562977
55729	ATF7IP	-0.236	-0.853662	0.0092	0.562977
2532	DARC	0.2449	0.799144	0.0092	0.562977
51011	FAHD2A	0.2684	0.834091	0.0092	0.562977
92579	G6PC3	0.2514	0.809417	0.0092	0.562977
9330	GTF3C3	-0.2429	-0.863417	0.0092	0.562977
7549	ZNF2	-0.2546	-0.87859	0.0092	0.562977
83401	ELOVL3	0.2585	0.820098	0.0093	0.562977
2213	FCGR2B	0.2592	0.821122	0.0093	0.562977
29118	DDX25	0.2619	0.82502	0.0094	0.562977
9516	LITAF	0.2412	0.79308	0.0094	0.562977
79722	ANKRD55	0.2811	0.85059	0.0095	0.562977
152877	FAM53A	0.254	0.813393	0.0095	0.562977
643866	CBLN3	0.269	0.834906	0.0096	0.562977
23213	SULF1	0.2421	0.79457	0.0097	0.562977
131669	UROC1	0.2429	0.795886	0.0097	0.562977
54507	ADAMTSL4	0.2503	0.807712	0.0098	0.562977
4126	MANBA	0.2583	0.819805	0.0099	0.562977
9633	MTL5	0.2536	0.812786	0.0099	0.562977
129049	SGSM1	0.2593	0.821267	0.0099	0.562977
7695	ZNF136	-0.258	-0.882695	0.0099	0.562977
55256	ADI1	0.2548	0.814601	0.01	0.562977
9595	CYTIP	0.248	0.804104	0.01	0.562977
2039	EPB49	0.2586	0.820245	0.01	0.562977
3892	KRT86	0.242	0.794404	0.01	0.562977
653786	LOC653786	0.2572	0.818184	0.01	0.562977
9645	MICAL2	0.2558	0.816101	0.01	0.562977
79083	MLPH	0.2639	0.827858	0.01	0.562977
53343	NUDT9	0.2531	0.812025	0.01	0.562977
84795	PYROXD2	0.2662	0.83107	0.01	0.562977
6938	TCF12	-0.2396	-0.858829	0.01	0.562977
114990	VASN	0.2618	0.824877	0.01	0.562977
80095	ZNF606	-0.2407	-0.860374	0.01	0.562977
53	ACP2	0.24356	0.796966	0.011	0.564521
535	ATP6V0A1	0.2481	0.804262	0.011	0.564521
57415	C3orf14	0.2792	0.848221	0.011	0.564521
1236	CCR7	0.2464	0.801558	0.011	0.564521
1514	CTSL1	0.2546	0.8143	0.011	0.564521
399697	CTXN2	0.2578	0.81907	0.011	0.564521
26122	EPC2	-0.2546	-0.87859	0.011	0.564521
54552	GNL3L	-0.2274	-0.840607	0.011	0.564521
2799	GNS	0.2517	0.809879	0.011	0.564521
3735	KARS	-0.2594	-0.884348	0.011	0.564521
66004	LYNX1	0.2463	0.801398	0.011	0.564521
333926	PPM1J	0.2534	0.812482	0.011	0.564521
145270	PRIMA1	0.2473	0.802993	0.011	0.564521
5621	PRNP	0.254	0.813393	0.011	0.564521
10636	RGS14	0.2349	0.78238	0.011	0.564521
90701	SEC11C	0.2369	0.785828	0.011	0.564521
56833	SLAMF8	0.249	0.80568	0.011	0.564521
126969	SLC44A3	0.2438	0.797358	0.011	0.564521
122809	SOCS4	-0.2561	-0.880418	0.011	0.564521
84926	SPRYD3	0.2344	0.78151	0.011	0.564521
10735	STAG2	-0.2655	-0.891294	0.011	0.564521
6873	TAF2	-0.2501	-0.872951	0.011	0.564521
256130	TMEM196	0.2465	0.801718	0.011	0.564521
55665	URGCP	0.2543	0.813847	0.011	0.564521
57687	VAT1L	0.2558	0.816101	0.011	0.564521
339324	ZNF260	-0.2517	-0.874983	0.011	0.564521
10224	ZNF443	-0.2287	-0.842646	0.011	0.564521
654254	ZNF732	-0.2337	-0.85027	0.011	0.564521
390927	ZNF793	-0.2288	-0.842802	0.011	0.564521
22	ABCB7	-0.2515	-0.874731	0.012	0.565815
141	ADPRH	0.2322	0.777648	0.012	0.565815
59344	ALOXE3	0.2633	0.827011	0.012	0.565815
1174	AP1S1	0.2491	0.805837	0.012	0.565815
7919	BAT1	-0.2231	-0.833687	0.012	0.565815
54718	BTN2A3	-0.2441	-0.865051	0.012	0.565815
117144	CATSPER1	0.2839	0.854018	0.012	0.565815
56267	CCBL2	-0.252	-0.875361	0.012	0.565815
6352	CCL5	0.2444	0.798334	0.012	0.565815
912	CD1D	0.264	0.827998	0.012	0.565815
1089	CEACAM4	0.2417	0.793908	0.012	0.565815
10063	COX17	0.2335	0.779937	0.012	0.565815
54935	DUSP23	0.2507	0.808334	0.012	0.565815
11328	FKBP9	0.2435	0.796868	0.012	0.565815
2978	GUCA1A	0.228	0.770107	0.012	0.565815
3622	ING2	0.2356	0.783592	0.012	0.565815
84171	LOXL4	0.25215	0.810571	0.012	0.565815
64747	MFSD1	0.2217	0.75838	0.012	0.565815
4327	MMP19	0.2757	0.843767	0.012	0.565815
4482	MSRA	0.2368	0.785657	0.012	0.565815
54587	MXRA8	0.2766	0.844924	0.012	0.565815
63935	PCIF1	-0.2317	-0.847262	0.012	0.565815
64425	POLR1E	-0.2325	-0.848472	0.012	0.565815
5468	PPARG	0.2449	0.799144	0.012	0.565815
57709	SLC7A14	0.251	0.808799	0.012	0.565815
6861	SYT5	0.2557	0.815952	0.012	0.565815
83857	TMTC1	0.2555	0.815652	0.012	0.565815
10773	ZBTB6	-0.2532	-0.876861	0.012	0.565815
9310	ZNF235	-0.2156	-0.820963	0.012	0.565815
526	ATP6V1B2	0.2255	0.765514	0.013	0.569867
256329	C11orf35	0.2407	0.792248	0.013	0.569867
90529	C1orf201	0.239	0.789397	0.013	0.569867
23313	C22orf9	0.2503	0.807712	0.013	0.569867
1114	CHGB	0.2494	0.806307	0.013	0.569867
55748	CNDP2	0.228	0.770107	0.013	0.569867
11269	DDX19B	-0.2361	-0.853808	0.013	0.569867
728656	DMRTC1B	0.2283	0.770653	0.013	0.569867
1965	EIF2S1	-0.2322	-0.848019	0.013	0.569867
1991	ELANE	0.2536	0.812786	0.013	0.569867
285966	FAM115C	0.2362	0.784627	0.013	0.569867
2582	GALE	0.2337	0.780288	0.013	0.569867
3229	HOXC13	0.2612	0.824017	0.013	0.569867
51440	HPCAL4	0.2506	0.808178	0.013	0.569867
7850	IL1R2	0.234	0.780812	0.013	0.569867
387755	INSC	0.2499	0.807089	0.013	0.569867
79944	L2HGDH	-0.2444	-0.865456	0.013	0.569867
79873	NUDT18	0.2475	0.803311	0.013	0.569867
126014	OSCAR	0.2422	0.794734	0.013	0.569867
9601	PDIA4	0.2588	0.820537	0.013	0.569867
5577	PRKAR2B	0.245	0.799306	0.013	0.569867
284119	PTRF	0.2368	0.785657	0.013	0.569867
950	SCARB2	0.2268	0.767912	0.013	0.569867
158931	TCEAL6	0.2542	0.813695	0.013	0.569867
7768	ZNF225	-0.2282	-0.841865	0.013	0.569867
84449	ZNF333	-0.2215	-0.831044	0.013	0.569867
84924	ZNF566	-0.2376	-0.85598	0.013	0.569867
10282	BET1	0.2257	0.765884	0.014	0.583322
219738	C10orf35	0.2429	0.795886	0.014	0.583322
100129792	CCDC152	0.2391	0.789566	0.014	0.583322
64866	CDCP1	0.2298	0.773366	0.014	0.583322
5010	CLDN11	0.2238	0.762345	0.014	0.583322
64693	CTAGE1	-0.2366	-0.854535	0.014	0.583322
23604	DAPK2	0.2219	0.75876	0.014	0.583322
2517	FUCA1	0.2282	0.770471	0.014	0.583322
3166	HMX1	0.2384	0.788383	0.014	0.583322
100302401	LOC100302401	0.23	0.773725	0.014	0.583322
729156	LOC729156	0.2266	0.767545	0.014	0.583322
64419	MTMR14	0.2359	0.78411	0.014	0.583322
4681	NBL1	0.2587	0.820391	0.014	0.583322
64127	NOD2	0.2413	0.793246	0.014	0.583322
115827	RAB3C	0.2435	0.796868	0.014	0.583322
26470	SEZ6L2	0.2302	0.774084	0.014	0.583322
169166	SNX31	-0.239	-0.85798	0.014	0.583322
284114	TMEM102	0.234	0.780812	0.014	0.583322
10318	TNIP1	0.221	0.757045	0.014	0.583322
147923	ZNF420	-0.2349	-0.852049	0.014	0.583322
221	ALDH3B1	0.2367	0.785486	0.015	0.587495
247	ALOX15B	0.207	0.729	0.015	0.587495
644	BLVRA	0.2273	0.768829	0.015	0.587495
55172	C14orf104	-0.2272	-0.840291	0.015	0.587495
84570	COL25A1	-0.2351	-0.852343	0.015	0.587495
5045	FURIN	0.2421	0.79457	0.015	0.587495
2747	GLUD2	-0.24195	-0.86211	0.015	0.587495
55766	H2AFJ	0.2442	0.798009	0.015	0.587495
138050	HGSNAT	0.241	0.792747	0.015	0.587495
8870	IER3	0.2556	0.815802	0.015	0.587495
65095	KRI1	-0.2211	-0.830377	0.015	0.587495
255167	LOC255167	0.2389	0.789228	0.015	0.587495
4794	NFKBIE	0.2473	0.802993	0.015	0.587495
152518	NFXL1	-0.2281	-0.841708	0.015	0.587495
55660	PRPF40A	-0.2293	-0.84358	0.015	0.587495
5879	RAC1	0.2346	0.781859	0.015	0.587495
113157	RPLP0P2	0.2382	0.788044	0.015	0.587495
114132	SIGLEC11	0.2219	0.75876	0.015	0.587495
8470	SORBS2	0.2663	0.831208	0.015	0.587495
85025	TMEM60	0.22972	0.773222	0.015	0.587495
256051	ZNF549	-0.215	-0.819908	0.015	0.587495
23394	ADNP	-0.222	-0.831874	0.016	0.587495
57037	ANKMY2	0.2344	0.78151	0.016	0.587495
374	AREG	0.255	0.814902	0.016	0.587495
57820	CCNB1IP1	-0.2248	-0.836455	0.016	0.587495
1368	CPM	0.2085	0.73213	0.016	0.587495
10563	CXCL13	0.248	0.804104	0.016	0.587495
2171	FABP5	0.2525	0.811108	0.016	0.587495
84142	FAM175A	-0.2387	-0.857553	0.016	0.587495
26240	FAM50B	0.2254	0.765328	0.016	0.587495
3002	GZMB	0.2571	0.818036	0.016	0.587495
79192	IRX1	0.2416	0.793743	0.016	0.587495
4121	MAN1A1	0.2355	0.78342	0.016	0.587495
114044	MCM3APAS	-0.2232	-0.833851	0.016	0.587495
246330	PELI3	0.2274	0.769012	0.016	0.587495
79837	PIP4K2C	0.2283	0.770653	0.016	0.587495
84950	PRPF38A	-0.2281	-0.841708	0.016	0.587495
8899	PRPF4B	-0.219	-0.826837	0.016	0.587495
285533	RNF175	0.2358	0.783938	0.016	0.587495
55328	RNLS	0.2467	0.802037	0.016	0.587495
6447	SCG5	0.2248	0.764214	0.016	0.587495
26135	SERBP1	-0.2069	-0.805108	0.016	0.587495
80024	SLC24A6	0.2357	0.783765	0.016	0.587495
9874	TLK1	-0.2302	-0.84497	0.016	0.587495
8741	TNFSF13	0.2251	0.764772	0.016	0.587495
57570	TRMT5	-0.235	-0.852196	0.016	0.587495
23335	WDR7	0.2262	0.766808	0.016	0.587495
7570	ZNF22	-0.2352	-0.85249	0.016	0.587495
163087	ZNF383	-0.2277	-0.84108	0.016	0.587495
65985	AACS	0.237	0.785999	0.017	0.587495
9429	ABCG2	-0.231	-0.846197	0.017	0.587495
219	ALDH1B1	-0.2407	-0.860374	0.017	0.587495
55911	APOB48R	0.2325	0.778178	0.017	0.587495
219621	C10orf107	0.2128	0.740936	0.017	0.587495
23632	CA14	-0.2332	-0.849523	0.017	0.587495
1212	CLTB	0.2349	0.78238	0.017	0.587495
1802	DPH2	-0.2184	-0.825813	0.017	0.587495
2203	FBP1	0.219	0.753198	0.017	0.587495
2281	FKBP1B	0.2326	0.778354	0.017	0.587495
3162	HMOX1	0.2613	0.82416	0.017	0.587495
57578	KIAA1409	0.237	0.785999	0.017	0.587495
4234	METTL1	0.2145	0.744349	0.017	0.587495
8974	P4HA2	0.2394	0.790071	0.017	0.587495
5087	PBX1	-0.2267	-0.839499	0.017	0.587495
22925	PLA2R1	0.2408	0.792414	0.017	0.587495
196463	PLBD2	0.226	0.766439	0.017	0.587495
10769	PLK2	0.2249	0.7644	0.017	0.587495
80339	PNPLA3	-0.2361	-0.853808	0.017	0.587495
57804	POLD4	0.2389	0.789228	0.017	0.587495
23682	RAB38	0.2268	0.767912	0.017	0.587495
200162	SPAG17	0.2111	0.737485	0.017	0.587495
6804	STX1A	0.2481	0.804262	0.017	0.587495
1200	TPP1	0.2217	0.75838	0.017	0.587495
134111	UBE2QL1	0.2431	0.796214	0.017	0.587495
93134	ZNF561	-0.2116	-0.813823	0.017	0.587495
7562	ZNF708	-0.2343	-0.851162	0.017	0.587495
35	ACADS	0.238	0.787704	0.018	0.587495
537	ATP6AP1	0.2225	0.759897	0.018	0.587495
29919	C18orf8	0.2383	0.788213	0.018	0.587495
165257	C1QL2	0.2254	0.765328	0.018	0.587495
25966	C2CD2	0.2319	0.777116	0.018	0.587495
653140	C2orf84	0.2543	0.813847	0.018	0.587495
54825	CDHR2	0.2319	0.777116	0.018	0.587495
51816	CECR1	0.2095	0.734201	0.018	0.587495
1571	CYP2E1	-0.2199	-0.828362	0.018	0.587495
79269	DCAF10	-0.2293	-0.84358	0.018	0.587495
79672	FN3KRP	0.2151	0.745544	0.018	0.587495
10272	FSTL3	0.224	0.76272	0.018	0.587495
2618	GART	-0.2303	-0.845124	0.018	0.587495
27198	GPR81	-0.2149	-0.819731	0.018	0.587495
27197	GPR82	0.2305	0.774622	0.018	0.587495
92815	HIST3H2A	-0.2164	-0.822361	0.018	0.587495
7184	HSP90B1	0.229	0.771922	0.018	0.587495
7071	KLF10	0.2378	0.787364	0.018	0.587495
4025	LPO	0.2503	0.807712	0.018	0.587495
4357	MPST	-0.2244	-0.835808	0.018	0.587495
58529	MYOZ1	0.2236	0.76197	0.018	0.587495
9970	NR1I3	0.2234	0.761594	0.018	0.587495
80228	ORAI2	0.2254	0.765328	0.018	0.587495
55742	PARVA	0.2493	0.806151	0.018	0.587495
138429	PIP5KL1	-0.2238	-0.834832	0.018	0.587495
54896	PQLC2	0.2266	0.767545	0.018	0.587495
10419	PRMT5	-0.2023	-0.796227	0.018	0.587495
54458	PRR13	0.2125	0.74033	0.018	0.587495
54913	RPP25	0.228	0.770107	0.018	0.587495
6556	SLC11A1	0.214	0.743349	0.018	0.587495
4093	SMAD9	-0.2219	-0.831708	0.018	0.587495
136853	SRCRB4D	0.2329	0.778883	0.018	0.587495
9399	STOML1	0.214	0.743349	0.018	0.587495
84107	ZIC4	0.2133	0.741944	0.018	0.587495
284370	ZNF615	-0.2106	-0.811998	0.018	0.587495
27063	ANKRD1	0.249	0.80568	0.019	0.587495
317648	C4orf10	0.237	0.785999	0.019	0.587495
968	CD68	0.224	0.76272	0.019	0.587495
8904	CPNE1	-0.206	-0.803398	0.019	0.587495
1588	CYP19A1	0.222	0.75895	0.019	0.587495
150350	ENTHD1	0.2454	0.799952	0.019	0.587495
83888	FGFBP2	0.2172	0.74969	0.019	0.587495
2768	GNA12	0.2317	0.776761	0.019	0.587495
3248	HPGD	-0.22123	-0.830594	0.019	0.587495
57535	KIAA1324	0.2167	0.748708	0.019	0.587495
4897	NRCAM	0.2109	0.737076	0.019	0.587495
5058	PAK1	0.2302	0.774084	0.019	0.587495
5122	PCSK1	0.2514	0.809417	0.019	0.587495
26147	PHF19	-0.2104	-0.811631	0.019	0.587495
283659	PRTG	-0.22	-0.828531	0.019	0.587495
677777	SCARNA12	-0.2326	-0.848623	0.019	0.587495
6441	SFTPD	0.2402	0.791413	0.019	0.587495
54937	SOHLH2	-0.2034	-0.798383	0.019	0.587495
6676	SPAG4	0.2303	0.774264	0.019	0.587495
65267	WNK3	-0.2206	-0.82954	0.019	0.587495
9531	BAG3	0.2234	0.761594	0.02	0.587495
254427	C10orf47	-0.2207	-0.829708	0.02	0.587495
84270	C9orf89	0.2238	0.762345	0.02	0.587495
939	CD27	0.2208	0.756663	0.02	0.587495
56253	CRTAM	0.2213	0.757618	0.02	0.587495
1534	CYB561	0.2265	0.767361	0.02	0.587495
6990	DYNLT3	0.2122	0.739722	0.02	0.587495
1908	EDN3	-0.2392	-0.858263	0.02	0.587495
2019	EN1	0.2213	0.757618	0.02	0.587495
2046	EPHA8	0.2398	0.790743	0.02	0.587495
3614	IMPDH1	0.2186	0.752422	0.02	0.587495
3675	ITGA3	0.2372	0.786341	0.02	0.587495
84456	L3MBTL3	-0.217	-0.823403	0.02	0.587495
100134713	LOC100134713	0.2351	0.782727	0.02	0.587495
84557	MAP1LC3A	0.2211	0.757236	0.02	0.587495
80198	MUS81	-0.2446	-0.865726	0.02	0.587495
5459	POU4F3	0.2407	0.792248	0.02	0.587495
644943	RASSF10	0.2437	0.797195	0.02	0.587495
27289	RND1	0.2437	0.797195	0.02	0.587495
64094	SMOC2	0.2678	0.833272	0.02	0.587495
55240	STEAP3	0.2092	0.733581	0.02	0.587495
80731	THSD7B	-0.2287	-0.842646	0.02	0.587495
222068	TMED4	0.23772	0.787228	0.02	0.587495
9712	USP6NL	-0.2303	-0.845124	0.02	0.587495
128434	VSTM2L	0.2222	0.759329	0.02	0.587495
7472	WNT2	0.224	0.76272	0.02	0.587495
22835	ZFP30	-0.2137	-0.817603	0.02	0.587495
90204	ZSWIM1	-0.2165	-0.822535	0.02	0.587495
8120	AP3B2	0.2367	0.785486	0.021	0.587495
392	ARHGAP1	0.2192	0.753585	0.021	0.587495
414	ARSD	0.21174	0.738788	0.021	0.587495
389203	C4orf52	0.2236	0.76197	0.021	0.587495
905	CCNT2	-0.2109	-0.812547	0.021	0.587495
9308	CD83	0.2225	0.759897	0.021	0.587495
2068	ERCC2	-0.2089	-0.80886	0.021	0.587495
3291	HSD11B2	-0.2113	-0.813277	0.021	0.587495
5654	HTRA1	0.2075	0.730047	0.021	0.587495
3600	IL15	0.223	0.760841	0.021	0.587495
79168	LILRA6	0.2289	0.771741	0.021	0.587495
100132111	LOC100132111	0.2293	0.772465	0.021	0.587495
84466	MEGF10	0.22096	0.756969	0.021	0.587495
10797	MTHFD2	-0.244	-0.864915	0.021	0.587495
84073	MYCBPAP	0.1971	0.707557	0.021	0.587495
140838	NANP	-0.2015	-0.794647	0.021	0.587495
654817	NCF1C	0.2177	0.750669	0.021	0.587495
25812	POM121L1P	0.23768	0.78716	0.021	0.587495
84957	RELT	0.2466	0.801878	0.021	0.587495
80352	RNF39	-0.1985	-0.788623	0.021	0.587495
6341	SCO1	0.2372	0.786341	0.021	0.587495
162515	SLC16A11	0.2183	0.751839	0.021	0.587495
144195	SLC2A14	0.239	0.789397	0.021	0.587495
6541	SLC7A1	-0.2205	-0.829372	0.021	0.587495
7955	STL	0.2291	0.772103	0.021	0.587495
5987	TRIM27	-0.2106	-0.811998	0.021	0.587495
127733	UBXN10	0.2143	0.743949	0.021	0.587495
26100	WIPI2	0.2426	0.795393	0.021	0.587495
64288	ZNF323	-0.2235	-0.834342	0.021	0.587495
25946	ZNF385A	0.2206	0.75628	0.021	0.587495
92283	ZNF461	-0.2096	-0.810158	0.021	0.587495
257106	ARHGAP30	0.2294	0.772645	0.022	0.587495
55069	C7orf42	0.229582	0.772973	0.022	0.587495
1040	CDS1	0.2242	0.763094	0.022	0.587495
9718	ECE2	0.1991	0.711999	0.022	0.587495
10961	ERP29	0.2238	0.762345	0.022	0.587495
83989	FAM172A	0.2226	0.760086	0.022	0.587495
51030	FAM18B	0.1991	0.711999	0.022	0.587495
89848	FCHSD1	0.2218	0.75857	0.022	0.587495
125111	GJD3	0.2267	0.767728	0.022	0.587495
3073	HEXA	0.2164	0.748118	0.022	0.587495
3116	HLA-DPB2	0.2393	0.789903	0.022	0.587495
3217	HOXB7	0.2274	0.769012	0.022	0.587495
222537	HS3ST5	0.2346	0.781859	0.022	0.587495
10437	IFI30	0.2228	0.760464	0.022	0.587495
2531	KDSR	0.2095	0.734201	0.022	0.587495
606724	LOC606724	0.2067	0.72837	0.022	0.587495
5604	MAP2K1	0.2125	0.74033	0.022	0.587495
84975	MFSD5	0.2077	0.730464	0.022	0.587495
26227	PHGDH	-0.2145	-0.819024	0.022	0.587495
5447	POR	0.24439	0.798318	0.022	0.587495
5580	PRKCD	0.2268	0.767912	0.022	0.587495
64864	RFX7	-0.2472	-0.869188	0.022	0.587495
5999	RGS4	0.2361	0.784455	0.022	0.587495
6285	S100B	0.217	0.749298	0.022	0.587495
441027	TMEM150C	0.2075	0.730047	0.022	0.587495
7291	TWIST1	0.1965	0.706213	0.022	0.587495
245806	VGLL2	0.2297	0.773186	0.022	0.587495
150244	ZDHHC8P1	0.2297	0.773186	0.022	0.587495
10172	ZNF256	-0.199	-0.789637	0.022	0.587495
79744	ZNF419	-0.202	-0.795636	0.022	0.587495
90594	ZNF439	-0.2122	-0.81491	0.022	0.587495
147657	ZNF480	-0.22	-0.828531	0.022	0.587495
163255	ZNF540	-0.2368	-0.854825	0.022	0.587495
284323	ZNF780A	-0.1961	-0.783692	0.022	0.587495
55552	ZNF823	-0.2123	-0.81509	0.022	0.587495
240	ALOX5	0.2135	0.742346	0.023	0.587495
375607	C7orf52	0.2356	0.783592	0.023	0.587495
919	CD247	0.2401	0.791246	0.023	0.587495
1453	CSNK1D	0.2121	0.739519	0.023	0.587495
1489	CTF1	0.2039	0.722432	0.023	0.587495
6374	CXCL5	0.2425	0.795229	0.023	0.587495
1674	DES	0.2195	0.754164	0.023	0.587495
8893	EIF2B5	-0.211415	-0.813486	0.023	0.587495
2184	FAH	0.2342	0.781162	0.023	0.587495
8139	GAN	-0.1923	-0.775678	0.023	0.587495
2825	GPR1	0.22	0.755128	0.023	0.587495
387036	GUSBL1	-0.2083	-0.807741	0.023	0.587495
23510	KCTD2	0.2131	0.741541	0.023	0.587495
137994	LETM2	0.2248	0.764214	0.023	0.587495
4760	NEUROD1	-0.2316	-0.84711	0.023	0.587495
5008	OSM	0.2335	0.779937	0.023	0.587495
10158	PDZK1IP1	0.223	0.760841	0.023	0.587495
51455	REV1	-0.1912	-0.77331	0.023	0.587495
6014	RIT2	0.2401	0.791246	0.023	0.587495
6282	S100A11	0.2232	0.761218	0.023	0.587495
55800	SCN3B	0.2288	0.77156	0.023	0.587495
23231	SEL1L3	0.2095	0.734201	0.023	0.587495
5271	SERPINB8	0.2337	0.780288	0.023	0.587495
89790	SIGLEC10	0.2029	0.720285	0.023	0.587495
115111	SLC26A7	-0.22744	-0.84067	0.023	0.587495
6598	SMARCB1	-0.2256	-0.837743	0.023	0.587495
7072	TIA1	-0.2061	-0.803588	0.023	0.587495
7076	TIMP1	0.2219	0.75876	0.023	0.587495
26036	ZNF451	-0.2133	-0.816888	0.023	0.587495
92285	ZNF585B	-0.2181	-0.825299	0.023	0.587495
146556	C16orf89	0.22	0.755128	0.024	0.597621
55352	C17orf79	0.1916	0.695047	0.024	0.597621
1665	DHX15	-0.2226	-0.832865	0.024	0.597621
64787	EPS8L2	0.214	0.743349	0.024	0.597621
201158	FAM18B2	0.2023	0.71899	0.024	0.597621
23403	FBXO46	-0.2068	-0.804918	0.024	0.597621
81606	LBH	0.254	0.813393	0.024	0.597621
55239	OGFOD1	-0.2205	-0.829372	0.024	0.597621
56103	PCDHGB2	0.2433	0.796541	0.024	0.597621
89801	PPP1R3F	0.2244	0.763468	0.024	0.597621
23221	RHOBTB2	0.2339	0.780638	0.024	0.597621
10653	SPINT2	0.233	0.779059	0.024	0.597621
60436	TGIF2	-0.2105	-0.811815	0.024	0.597621
84128	WDR75	-0.2066	-0.804539	0.024	0.597621
388566	ZNF470	-0.2193	-0.827346	0.024	0.597621
113146	AHNAK2	0.2226	0.760086	0.025	0.597621
26229	B3GAT3	0.2271	0.768463	0.025	0.597621
84935	C13orf33	0.2267	0.767728	0.025	0.597621
84254	CAMKK1	0.2112	0.737689	0.025	0.597621
221184	CPNE2	-0.19792	-0.78744	0.025	0.597621
1583	CYP11A1	0.209	0.733167	0.025	0.597621
11160	ERLIN2	0.2248	0.764214	0.025	0.597621
94234	FOXQ1	-0.1973	-0.78617	0.025	0.597621
100130557	LOC100130557	-0.21052	-0.811852	0.025	0.597621
8394	PIP5K1A	-0.2049	-0.80129	0.025	0.597621
5335	PLCG1	-0.2015	-0.794647	0.025	0.597621
64766	S100PBP	-0.1997	-0.791051	0.025	0.597621
1992	SERPINB1	0.203	0.7205	0.025	0.597621
9869	SETDB1	-0.2204	-0.829204	0.025	0.597621
6445	SGCG	-0.2062	-0.803779	0.025	0.597621
153769	SH3RF2	0.2516	0.809725	0.025	0.597621
400709	SIGLEC16	0.2267	0.767728	0.025	0.597621
63027	SLC22A23	0.2077	0.730464	0.025	0.597621
374403	TBC1D10C	0.2334	0.779762	0.025	0.597621
6934	TCF7L2	-0.2061	-0.803588	0.025	0.597621
50852	TRAT1	0.2168	0.748905	0.025	0.597621
55621	TRMT1	-0.1942	-0.779717	0.025	0.597621
23217	ZFR2	0.2155	0.746338	0.025	0.597621
84911	ZNF382	-0.1992	-0.790042	0.025	0.597621
353088	ZNF429	-0.2221	-0.83204	0.025	0.597621
163081	ZNF567	-0.207	-0.805297	0.025	0.597621
273	AMPH	0.2249	0.7644	0.026	0.597621
51744	CD244	0.2211	0.757236	0.026	0.597621
921	CD5	0.2036	0.721789	0.026	0.597621
151835	CPNE9	0.218	0.751254	0.026	0.597621
115265	DDIT4L	0.2257	0.765884	0.026	0.597621
2277	FIGF	0.2238	0.762345	0.026	0.597621
144321	GLIPR1L2	0.2132	0.741742	0.026	0.597621
29909	GPR171	0.2279	0.769925	0.026	0.597621
2878	GPX3	0.2062	0.727317	0.026	0.597621
121504	HIST4H4	0.2332	0.779411	0.026	0.597621
100124700	HOTAIR	0.2225	0.759897	0.026	0.597621
3739	KCNA4	0.2257	0.765884	0.026	0.597621
3903	LAIR1	0.2089	0.73296	0.026	0.597621
64844	2015-03-07	-0.21	-0.810896	0.026	0.597621
23164	MPRIP	0.216	0.747328	0.026	0.597621
10232	MSLN	0.2086	0.732338	0.026	0.597621
4841	NONO	-0.213	-0.81635	0.026	0.597621
5382	PMS2L4	0.2105	0.736257	0.026	0.597621
29774	POM121L9P	0.231	0.775515	0.026	0.597621
8000	PSCA	0.2151	0.745544	0.026	0.597621
653390	RRN3P2	0.1884	0.687569	0.026	0.597621
6289	SAA2	0.2076	0.730256	0.026	0.597621
9410	SNRNP40	-0.18788	-0.766031	0.026	0.597621
79713	TMEM149	0.2116	0.738504	0.026	0.597621
200728	TMEM17	0.218	0.751254	0.026	0.597621
65264	UBE2Z	0.2111	0.737485	0.026	0.597621
155368	WBSCR27	0.2103	0.735847	0.026	0.597621
151888	BTLA	0.2172	0.74969	0.027	0.597621
9191	DEDD	-0.215	-0.819908	0.027	0.597621
2135	EXTL2	-0.2183	-0.825642	0.027	0.597621
2968	GTF2H4	-0.2137	-0.817603	0.027	0.597621
3236	HOXD10	0.2199	0.754936	0.027	0.597621
116835	HSPA12B	-0.21	-0.810896	0.027	0.597621
3397	ID1	-0.20854	-0.808189	0.027	0.597621
3684	ITGAM	0.2069	0.72879	0.027	0.597621
57574	2015-03-04	0.2035	0.721575	0.027	0.597621
10588	MTHFS	0.2119	0.739114	0.027	0.597621
644596	NCRNA00087	0.2034	0.72136	0.027	0.597621
9891	NUAK1	0.2254	0.765328	0.027	0.597621
56133	PCDHB2	-0.1977	-0.78699	0.027	0.597621
5465	PPARA	-0.194	-0.779295	0.027	0.597621
25782	RAB3GAP2	-0.209	-0.809046	0.027	0.597621
1318	SLC31A2	0.2037	0.722003	0.027	0.597621
55234	SMU1	-0.219	-0.826837	0.027	0.597621
135892	TRIM50	0.2476	0.80347	0.027	0.597621
7568	ZNF20	-0.1963	-0.784107	0.027	0.597621
55609	ZNF280C	-0.1967	-0.784934	0.027	0.597621
115560	ZNF501	-0.2124	-0.815271	0.027	0.597621
90956	ADCK2	0.213	0.741339	0.028	0.597621
10095	ARPC1B	0.214	0.743349	0.028	0.597621
411	ARSB	0.2097	0.734613	0.028	0.597621
580	BARD1	-0.2148	-0.819555	0.028	0.597621
221424	C6orf154	0.2076	0.730256	0.028	0.597621
388372	CCL4L2	0.2121	0.739519	0.028	0.597621
894	CCND2	-0.205	-0.801482	0.028	0.597621
56474	CTPS2	-0.2243	-0.835645	0.028	0.597621
114757	CYGB	0.2254	0.765328	0.028	0.597621
80821	DDHD1	-0.2001	-0.791855	0.028	0.597621
1938	EEF2	-0.1963	-0.784107	0.028	0.597621
2746	GLUD1	-0.2034	-0.798383	0.028	0.597621
3223	HOXC6	0.1991	0.711999	0.028	0.597621
4131	MAP1B	0.1999	0.71376	0.028	0.597621
92935	MARS2	-0.2164	-0.822361	0.028	0.597621
9112	MTA1	-0.2068	-0.804918	0.028	0.597621
10071	MUC12	0.2135	0.742346	0.028	0.597621
4801	NFYB	0.1887	0.688276	0.028	0.597621
285855	RPL7L1	-0.1965	-0.784521	0.028	0.597621
5104	SERPINA5	0.196	0.705089	0.028	0.597621
10946	SF3A3	-0.19	-0.770702	0.028	0.597621
201232	SLC16A13	0.2224	0.759708	0.028	0.597621
10102	TSFM	0.208	0.73109	0.028	0.597621
117581	TWIST2	0.2063	0.727528	0.028	0.597621
8876	VNN1	0.2169	0.749101	0.028	0.597621
170261	ZCCHC12	0.223	0.760841	0.028	0.597621
7738	ZNF184	-0.2096	-0.810158	0.028	0.597621
125919	ZNF543	-0.2108	-0.812364	0.028	0.597621
51193	ZNF639	-0.2181	-0.825299	0.028	0.597621
55024	BANK1	0.204	0.722646	0.029	0.597621
51272	BET1L	0.237	0.785999	0.029	0.597621
6347	CCL2	0.1989	0.711557	0.029	0.597621
8534	CHST1	0.2038	0.722218	0.029	0.597621
28955	DEXI	0.2111	0.737485	0.029	0.597621
954	ENTPD2	0.216	0.747328	0.029	0.597621
79852	EPHX3	0.202	0.718341	0.029	0.597621
2091	FBL	-0.1887	-0.767848	0.029	0.597621
127943	FCRLB	0.2237	0.762158	0.029	0.597621
94104	GCFC1	-0.1914	-0.773742	0.029	0.597621
9380	GRHPR	-0.2068	-0.804918	0.029	0.597621
727957	HEATR7A	0.2115	0.7383	0.029	0.597621
3315	HSPB1	0.2113	0.737893	0.029	0.597621
3588	IL10RB	0.2192	0.753585	0.029	0.597621
22863	KIAA0831	-0.204	-0.79955	0.029	0.597621
100302640	LOC100302640	0.2242	0.763094	0.029	0.597621
4213	MEIS3P1	0.2096	0.734407	0.029	0.597621
4255	MGMT	0.199	0.711778	0.029	0.597621
8996	NOL3	0.2137	0.742748	0.029	0.597621
11051	NUDT21	-0.2142	-0.818492	0.029	0.597621
56924	PAK6	0.2161	0.747526	0.029	0.597621
5701	PSMC2	0.2135	0.742346	0.029	0.597621
6004	RGS16	0.20465	0.724033	0.029	0.597621
23504	RIMBP2	0.2224	0.759708	0.029	0.597621
6335	SCN9A	0.2197	0.75455	0.029	0.597621
[truncated: 16,031 more rows]

## Sheet: HNSC
Entrez ID	Gene Name	Raw Cox Coefficient	Sigmoidal Normalized Cox Coefficient	Raw Cox P-Value	BH Adjusted P-Value	Model: coxph(Surv(times,died) ~ gene + grade1 + grade2 + grade3 + grade4 + sex + age
[truncated: 16,652 more rows]

[truncated: 10 more sheets: KIRC, KIRP, LAML, LGG, LIHC, LUAD, LUSC, OV, SKCM, STAD]
