# Supplementary material for: A pan-cancer analysis of prognostic genes
Source: PeerJ. 2016 Feb 16;3:e1499. doi: 10.7717/peerj.1499 (PMC4815555; doi:10.7717/peerj.1499)
Supplement: Table S3 [file peerj-03-1499-s003.xlsx]

## Sheet: Sheet1
	Number of Genes	Gene Sets
Proliferation/DNA repair	1108	PUJANA_CHEK2_PCC_NETWORK/REACTOME_CELL_CYCLE_MITOTIC/KEGG_CELL_CYCLE,/REACTOME_DNA_REPAIR
Immune cell	448	REACTOME_CYTOKINE_SIGNALING_IN_IMMUNE_SYSTEM/KEGG_HEMATOPOIETIC_CELL_LINEAGE/REACTOME_TCR_SIGNALING/KEGG_NATURAL_KILLER_CELL_MEDIATED_CYTOTOXICITY
Tumor suppressing miRNA targets	1545	DACOSTA_UV_RESPONSE_VIA_ERCC3_DN/GTTTGTT,MIR-495/TGCTTTG,MIR-330/ACATTCC,MIR-1,MIR-206
MES/ECM	1090	HS_Red7/KEGG_ECM_RECEPTOR_INTERACTION/ORGAN_DEVELOPMENT/KEGG_FOCAL_ADHESION
MYC targets/TERT	1426	DANG_BOUND_BY_MYC/DAIRKEE_TERT_TARGETS_UP
Squamous diffrentiation/development	382	RICKMAN_TUMOR_DIFFERENTIATED_WELL_VS_POORLY_DN
Estrogen signaling	790	SMID_BREAST_CANCER_BASAL_DN/VANTVEER_BREAST_CANCER_ESR1_UP
FOXO/stemness	2510	TTGTTT_V$FOXO4_01/YTATTTTNR_V$MEF2_02
Cell-cell adhesion	96	Mclaudin_cluster
Fatty acid oxidation	414	CARBOXYLIC_ACID_METABOLIC_PROCESS/OXIDOREDUCTASE_ACTIVITY
Interferon	78	ZHANG_INTERFERON_RESPONSE/BROWNE_INTERFERON_RESPONSIVE_GENES
Hypoxia/Glycolysis	57	SEMENZA_HIF1_TARGETS/REACTOME_GLYCOLYSIS
Neural signaling	544	MODULE_100
Plasma membrane cell-cell signaling	247	MORF_CNTN1/MORF_CASP2/MORF_PML/MORF_DDX11
EGF signaling	58	NAGASHIMA_EGF_SIGNALING_UP
MAPKs	667	INTRACELLULAR_SIGNALING_CASCADE
Basal signaling	649	SMID_BREAST_CANCER_BASAL_UP/DOANE_BREAST_CANCER_ESR1_DN
Vesicle	17	MEMBRANE_COAT
1Q amplicon	188	HS_Green17
TAL1	100	GNF2_TAL1/GNF2_ANK1/GNF2_SPTB/GNF2_SPTA1/GNF2_MAP2K3
Anti-apoptosis/DNA stability	246	MORF_MT4
16Q22 amplicon	168	chr16q22
